# Supplementary material
Source: Research Square preprint supplement (doi:10.21203/rs.3.rs-9011956/v1)
Supplement: Supplementary file 1 [file e917373fef4c0de22bfd35f8.xlsx]

## Sheet: Data_1
Supplementary Data 1A. Type III tests of the fixed effects for the GLIMMIX model on Phytophthora nicotianae DNA concentrations
Effect	DF	F-value	Pr > F
Field	2	Infty	<0.0001
Sampling Time	4	Infty	<0.0001
Sampling Time * Field	8	Infty	<0.0001
Supplementary Data 1B. Least square means of Phytophthora nicotianae DNA by field
Field	Estimate	DF	t Value	Pr > |t|
Barnes	2803.18	161	0.32	0.748
C&C	67852	161	7.79	<.0001
Ferrel	64588	161	7.41	<.0001
Supplementary Data 1C. Least square means of Phytophthora nicotianae DNA by time point at each farm
Field	Sampling Time	Estimate	DF	t Value	Pr > |t|
Barnes	T1	346.75	55	0.4	0.6903
	T2	804.08	55	0.93	0.3571
	T3	4008.5	55	4.63	<.0001
	T4	7030.42	55	8.12	<.0001
	T5	1826.17	55	2.11	0.0395
C&C	T1	17064	51	1.96	0.0557
	T2	8618.5	51	0.99	0.3273
	T3	12808	51	1.47	0.1477
	T4	267735	51	30.73	<.0001
	T5	33037	51	3.79	0.0004
Ferrel	T1	52935	55	Infty	<.0001
	T2	32048	55	Infty	<.0001
	T3	192869	55	Infty	<.0001
	T4	41069	55	Infty	<.0001
	T5	4018.08	55	Infty	<.0001

## Sheet: Data_2
Supplementary Data 2. P-values for the effects of specices within each field on the relative abundance of the top ten bacterial and fungal genera determined by the Kruskal-Wallis test
	Barnes		C&C		Ferrel
Bacterial genus	Mean	Pr > ChiSq	Mean	Pr > ChiSq	Mean	Pr > ChiSq
Sphingomonas	2.74024	<.0001	5.14133	<.0001	4.06832	<.0001
Nocardioides	2.48507		4.54423		3.7148
Pseudarthrobacter	5.16445		3.43972		1.76075
Bacillus	1.55107		3.52491		2.19406
X67.14_ge	1.55396		2.36465		2.10332
Streptomyces	1.52903		2.18768		1.84674
Mycobacterium	1.27512		1.59901		1.51087
Conexibacter	1.10367		1.59006		1.59819
Solirubrobacter	1.1473		1.55114		1.49879
Bradyrhizobium	1.46946		0.987103		1.42002
Fungal genus	Mean	Pr > ChiSq	Mean	Pr > ChiSq	Mean	Pr > ChiSq
Fusarium	7.19782	<.0001	10.8024	<.0001	14.8829	<.0001
Trichoderma	0.587335		29.4474		0.881388
Gibellulopsis	10.3128		4.37991		7.99244
Actinomucor	0		0.00482		8.11523
Chaetomiaceae_unclassified	2.45675		2.52773		6.95858
Mortierellaceae_unclassified	2.15897		2.678		4.26573
Cladosporium	1.12196		0.369599		5.23624
Plectosphaerella	3.71573		1.80555		0.63563
Globodera	0.491757		4.95938		0.234672
Lasiosphaeris	4.9386		0.001902		0.057884

## Sheet: Data_3
Supplementary Data 3. Pairwise two-sided multiple comparison analysis of the top ten bacterial and fungal genera using Dwass, Steel, Critchlow-Fligner methd implemented in the Kruskal-Wallis test
	Barnes			C&C			Ferrel
Bacterial species comparison	Wilcoxon Z	DSCF Value	Pr > DSCF	Wilcoxon Z	DSCF Value	Pr > DSCF	Wilcoxon Z	DSCF Value	Pr > DSCF
Sphingomonas vs. Nocardioides	1.2715	1.7981	0.96	1.8517	2.6187	0.7018	1.0793	1.5263	0.9867
Sphingomonas vs. Pseudarthrobacter	-3.9327	5.5616	0.0034	4.5064	6.373	0.0003	5.7511	8.1333	<.0001
Sphingomonas vs. Bacillus	5.2337	7.4016	<.0001	3.982	5.6314	0.0027	5.2633	7.4434	<.0001
Sphingomonas vs. X67.14_ge	5.4998	7.7779	<.0001	6.1942	8.76	<.0001	5.6477	7.987	<.0001
Sphingomonas vs. Streptomyces	5.6477	7.987	<.0001	6.4236	9.0844	<.0001	6.3277	8.9488	<.0001
Sphingomonas vs. Mycobacterium	6.2686	8.8651	<.0001	6.4236	9.0844	<.0001	6.6086	9.346	<.0001
Sphingomonas vs. Conexibacter	6.5939	9.3251	<.0001	6.4236	9.0844	<.0001	6.5347	9.2415	<.0001
Sphingomonas vs. Solirubrobacter	6.4312	9.0951	<.0001	6.4236	9.0844	<.0001	6.5495	9.2624	<.0001
Sphingomonas vs. Bradyrhizobium	5.7511	8.1333	<.0001	6.4236	9.0844	<.0001	6.653	9.4088	<.0001
Nocardioides vs. Pseudarthrobacter	-4.6571	6.5861	0.0001	3.7034	5.2374	0.0081	5.9286	8.3842	<.0001
Nocardioides vs. Bacillus	5.0415	7.1297	<.0001	2.4908	3.5225	0.2732	5.2337	7.4016	<.0001
Nocardioides vs. X67.14_ge	5.2189	7.3806	<.0001	5.4404	7.6939	<.0001	5.8842	8.3215	<.0001
Nocardioides vs. Streptomyces	5.4407	7.6943	<.0001	5.8337	8.2501	<.0001	6.3425	8.9697	<.0001
Nocardioides vs. Mycobacterium	6.1799	8.7397	<.0001	6.4236	9.0844	<.0001	6.5791	9.3042	<.0001
Nocardioides vs. Conexibacter	6.653	9.4088	<.0001	6.3089	8.9222	<.0001	6.5347	9.2415	<.0001
Nocardioides vs. Solirubrobacter	6.3869	9.0324	<.0001	6.3745	9.0149	<.0001	6.5347	9.2415	<.0001
Nocardioides vs. Bradyrhizobium	5.5737	7.8824	<.0001	6.4236	9.0844	<.0001	6.5051	9.1997	<.0001
Pseudarthrobacter vs. Bacillus	6.0616	8.5724	<.0001	-1.8517	2.6187	0.7018	-2.2768	3.2199	0.4042
Pseudarthrobacter vs. X67.14_ge	6.3869	9.0324	<.0001	2.2942	3.2444	0.3927	-2.055	2.9063	0.5596
Pseudarthrobacter vs. Streptomyces	6.4608	9.1369	<.0001	2.3433	3.314	0.3608	-1.375	1.9445	0.935
Pseudarthrobacter vs. Mycobacterium	6.5495	9.2624	<.0001	5.7846	8.1806	<.0001	0.3696	0.5227	1
Pseudarthrobacter vs. Conexibacter	6.653	9.4088	<.0001	5.3749	7.6012	<.0001	0.0148	0.0209	1
Pseudarthrobacter vs. Solirubrobacter	6.6086	9.346	<.0001	5.5715	7.8793	<.0001	0.6801	0.9618	0.9996
Pseudarthrobacter vs. Bradyrhizobium	6.5051	9.1997	<.0001	6.1123	8.6441	<.0001	0.547	0.7736	0.9999
Bacillus vs. X67.14_ge	-1.715	2.4254	0.7873	3.6707	5.1911	0.0091	0	0	1
Bacillus vs. Streptomyces	-1.7002	2.4045	0.7958	4.2278	5.979	0.001	1.094	1.5472	0.9854
Bacillus vs. Mycobacterium	0.6949	0.9827	0.9995	5.5388	7.833	<.0001	3.6813	5.2062	0.0088
Bacillus vs. Conexibacter	2.4246	3.429	0.3109	5.4568	7.7171	<.0001	2.9865	4.2235	0.0835
Bacillus vs. Solirubrobacter	2.3655	3.3453	0.3468	5.5715	7.8793	<.0001	3.5778	5.0598	0.0128
Bacillus vs. Bradyrhizobium	-1.1532	1.6309	0.979	5.7518	8.1342	<.0001	3.4596	4.8926	0.0193
X67.14_ge vs. Streptomyces	-0.1183	0.1673	1	0.3113	0.4403	1	1.5376	2.1745	0.8772
X67.14_ge vs. Mycobacterium	3.2082	4.5371	0.0437	3.9165	5.5387	0.0036	3.844	5.4362	0.0048
X67.14_ge vs. Conexibacter	5.0563	7.1507	<.0001	3.7854	5.3533	0.006	3.2378	4.5789	0.0398
X67.14_ge vs. Solirubrobacter	4.3023	6.0843	0.0007	3.9656	5.6082	0.0029	3.6961	5.2271	0.0083
X67.14_ge vs. Bradyrhizobium	0.5175	0.7318	1	5.1291	7.2536	<.0001	3.5926	5.0807	0.0121
Streptomyces vs. Mycobacterium	3.0308	4.2862	0.0737	3.5396	5.0057	0.0146	3.0308	4.2862	0.0737
Streptomyces vs. Conexibacter	4.938	6.9834	<.0001	3.1299	4.4263	0.0553	2.1733	3.0735	0.4753
Streptomyces vs. Solirubrobacter	4.3023	6.0843	0.0007	3.3265	4.7044	0.0301	2.883	4.0771	0.1102
Streptomyces vs. Bradyrhizobium	0.8427	1.1918	0.9979	4.8669	6.8828	<.0001	2.809	3.9726	0.1332
Mycobacterium vs. Conexibacter	1.9959	2.8226	0.6019	0.4588	0.6489	1	-0.7097	1.0036	0.9995
Mycobacterium vs. Solirubrobacter	1.9663	2.7808	0.6229	0.9832	1.3905	0.9932	0.2366	0.3345	1
Mycobacterium vs. Bradyrhizobium	-2.4838	3.5126	0.2771	2.8677	4.0555	0.1147	-0.2809	0.3973	1
Conexibacter vs. Solirubrobacter	0.0444	0.0627	1	0.3605	0.5098	1	1.0645	1.5054	0.988
Conexibacter vs. Bradyrhizobium	-4.2727	6.0425	0.0008	2.8349	4.0092	0.1248	0.7392	1.0454	0.9993
Solirubrobacter vs. Bradyrhizobium	-3.5335	4.9971	0.015	2.4253	3.4298	0.3105	0	0	1
Fungal species comparison	Wilcoxon Z	DSCF Value	Pr > DSCF	Wilcoxon Z	DSCF Value	Pr > DSCF	Wilcoxon Z	DSCF Value	Pr > DSCF
Fusarium vs. Trichoderma	6.6234	9.3669	<.0001	-5.1291	7.2536	<.0001	6.6086	9.346	<.0001
Fusarium vs. Gibellulopsis	-1.4784	2.0908	0.901	3.9328	5.5619	0.0033	4.5832	6.4816	0.0002
Fusarium vs. Actinomucor	7.1119	10.0578	<.0001	6.486	9.1726	<.0001	3.9622	5.6034	0.003
Fusarium vs. Chaetomiaceae_unclassified	5.6181	7.9452	<.0001	4.703	6.6511	0.0001	6.032	8.5306	<.0001
Fusarium vs. Mortierellaceae_unclassified	5.5589	7.8615	<.0001	4.5719	6.4657	0.0002	6.0912	8.6142	<.0001
Fusarium vs. Cladosporium	6.3721	9.0115	<.0001	6.2925	8.899	<.0001	4.9232	6.9625	<.0001
Fusarium vs. Plectosphaerella	4.4501	6.2934	0.0004	5.7354	8.1111	<.0001	6.653	9.4088	<.0001
Fusarium vs. Globodera	6.6049	9.3407	<.0001	3.769	5.3302	0.0063	6.7794	9.5876	<.0001
Fusarium vs. Lasiosphaeris	3.2821	4.6417	0.0347	6.5526	9.2667	<.0001	6.6582	9.4161	<.0001
Trichoderma vs. Gibellulopsis	-6.6382	9.3878	<.0001	5.9976	8.4819	<.0001	-6.0616	8.5724	<.0001
Trichoderma vs. Actinomucor	7.1119	10.0578	<.0001	6.486	9.1726	<.0001	-5.2485	7.4225	<.0001
Trichoderma vs. Chaetomiaceae_unclassified	-5.9433	8.4052	<.0001	6.4073	9.0612	<.0001	-5.8694	8.3006	<.0001
Trichoderma vs. Mortierellaceae_unclassified	-3.3561	4.7462	0.0273	6.3745	9.0149	<.0001	-5.6772	8.0288	<.0001
Trichoderma vs. Cladosporium	-1.5967	2.2581	0.8502	6.4236	9.0844	<.0001	-3.77	5.3316	0.0063
Trichoderma vs. Plectosphaerella	-6.4608	9.1369	<.0001	6.1287	8.6673	<.0001	1.5006	2.1222	0.8924
Trichoderma vs. Globodera	2.251	3.1834	0.4216	5.588	7.9026	<.0001	5.8906	8.3305	<.0001
Trichoderma vs. Lasiosphaeris	-5.8103	8.217	<.0001	6.5526	9.2667	<.0001	6.2735	8.872	<.0001
Gibellulopsis vs. Actinomucor	7.1119	10.0578	<.0001	6.486	9.1726	<.0001	-0.3548	0.5018	1
Gibellulopsis vs. Chaetomiaceae_unclassified	6.0616	8.5724	<.0001	0.7538	1.066	0.9991	-0.6949	0.9827	0.9995
Gibellulopsis vs. Mortierellaceae_unclassified	5.8398	8.2588	<.0001	1.3765	1.9467	0.9346	1.4489	2.049	0.9117
Gibellulopsis vs. Cladosporium	6.4608	9.1369	<.0001	5.7518	8.1342	<.0001	1.3158	1.8608	0.9503
Gibellulopsis vs. Plectosphaerella	5.0858	7.1925	<.0001	5.1291	7.2536	<.0001	6.2242	8.8024	<.0001
Gibellulopsis vs. Globodera	6.6493	9.4035	<.0001	2.0812	2.9432	0.5409	6.4179	9.0762	<.0001
Gibellulopsis vs. Lasiosphaeris	3.9474	5.5825	0.0032	6.5526	9.2667	<.0001	6.6582	9.4161	<.0001
Actinomucor vs. Chaetomiaceae_unclassified	-7.1119	10.0578	<.0001	-6.486	9.1726	<.0001	0.0591	0.0836	1
Actinomucor vs. Mortierellaceae_unclassified	-7.1119	10.0578	<.0001	-6.486	9.1726	<.0001	1.7741	2.509	0.7518
Actinomucor vs. Cladosporium	-7.1119	10.0578	<.0001	-6.2875	8.8918	<.0001	1.4489	2.049	0.9117
Actinomucor vs. Plectosphaerella	-7.1119	10.0578	<.0001	-6.486	9.1726	<.0001	5.692	8.0497	<.0001
Actinomucor vs. Globodera	-5.4677	7.7325	<.0001	-5.5512	7.8505	<.0001	6.448	9.1188	<.0001
Actinomucor vs. Lasiosphaeris	-7.1119	10.0578	<.0001	1.3949	1.9727	0.9292	6.5842	9.3115	<.0001
Chaetomiaceae_unclassified vs. Mortierellaceae_unclassified	1.9811	2.8017	0.6125	0.8357	1.1819	0.998	3.0308	4.2862	0.0737
Chaetomiaceae_unclassified vs. Cladosporium	4.1988	5.938	0.0011	5.7518	8.1342	<.0001	1.5228	2.1536	0.8834
Chaetomiaceae_unclassified vs. Plectosphaerella	-3.2969	4.6626	0.0331	4.9652	7.0219	<.0001	6.3425	8.9697	<.0001
Chaetomiaceae_unclassified vs. Globodera	5.4942	7.77	<.0001	1.7862	2.5261	0.7442	6.448	9.1188	<.0001
Chaetomiaceae_unclassified vs. Lasiosphaeris	-2.5134	3.5544	0.261	6.5526	9.2667	<.0001	6.6286	9.3742	<.0001
Mortierellaceae_unclassified vs. Cladosporium	1.8333	2.5926	0.714	4.6375	6.5584	0.0002	0.2809	0.3973	1
Mortierellaceae_unclassified vs. Plectosphaerella	-3.6665	5.1853	0.0093	3.4248	4.8435	0.0217	5.7659	8.1543	<.0001
Mortierellaceae_unclassified vs. Globodera	4.1169	5.8222	0.0016	1.1143	1.5759	0.9834	6.2823	8.8845	<.0001
Mortierellaceae_unclassified vs. Lasiosphaeris	-3.1934	4.5162	0.0457	6.5526	9.2667	<.0001	6.6138	9.3533	<.0001
Cladosporium vs. Plectosphaerella	-5.3224	7.527	<.0001	-2.6711	3.7774	0.1854	4.4649	6.3143	0.0003
Cladosporium vs. Globodera	3.2432	4.5866	0.0392	-2.2286	3.1518	0.4368	6.3275	8.9484	<.0001
Cladosporium vs. Lasiosphaeris	-4.8197	6.8161	<.0001	6.469	9.1485	<.0001	6.4806	9.165	<.0001
Plectosphaerella vs. Globodera	6.3087	8.9218	<.0001	-0.7866	1.1124	0.9988	5.8454	8.2666	<.0001
Plectosphaerella vs. Lasiosphaeris	0.3253	0.46	1	6.5526	9.2667	<.0001	6.0663	8.5791	<.0001
Globodera vs. Lasiosphaeris	-5.9237	8.3773	<.0001	5.842	8.2619	<.0001	-3.3108	4.6822	0.0316

## Sheet: Data_4
Supplementary Data 4. P-values for the effects of sampling time within each field on the relative abundance of the top ten bacterial and fungal genera determined by the Kruskal-Wallis test
Top 10 bacterial genera	Field	Timepoint comparation	Sphingomonas	Nocardioides	Pseudarthrobacter	Bacillus	X67.14_ge	Streptomyces	Mycobacterium	Conexibacter	Solirubrobacter	Bradyrhizobium
	Barnes	T1 vs. T2	0.3964	0.6009	0.8727	0.3057	0.9892	0.8727	0.4965	0.9977	0.3964	0.0775
		T1 vs. T3	0.7956	0.703	0.228	0.9977	0.703	0.8727	0.9977	0.9684	0.703	0.0775
		T1 vs. T4	0.1147	0.4965	0.0775	0.0322	0.9684	0.0775	0.0508	0.228	0.1147	0.0775
		T1 vs. T5	0.6009	0.1644	0.9892	0.9684	0.8727	0.9999	0.3057	0.9684	0.4965	0.1644
		T2 vs. T3	0.9999	0.9305	0.0775	0.6009	0.4965	0.4965	0.9305	0.9999	0.7956	0.3057
		T2 vs. T4	0.0322	0.228	0.0322	0.0775	0.9892	0.3057	0.3057	0.7956	0.9977	1
		T2 vs. T5	0.0508	0.0322	0.9999	0.9977	0.7956	0.703	0.8727	0.8727	0.3964	0.9892
		T3 vs. T4	0.0322	0.3964	0.9999	0.0775	0.4965	0.1147	0.0775	0.8727	0.703	0.703
		T3 vs. T5	0.228	0.0775	0.1147	0.9977	0.9684	0.9977	0.3057	0.7956	0.9684	0.8727
		T4 vs. T5	0.1147	0.3057	0.0508	0.1644	0.4965	0.0322	0.9892	0.1644	0.228	0.8727
	C&C	T1 vs. T2	0.9305	0.9999	0.4965	0.9305	0.9999	0.3964	0.0322	0.9684	1	0.8727
		T1 vs. T3	0.3057	0.1147	0.9977	0.9684	0.8727	0.3057	0.0322	0.9684	0.8727	0.9305
		T1 vs. T4	0.824	0.2064	0.9995	0.0782	0.1308	0.7041	0.0782	0.9995	0.9139	0.9995
		T1 vs. T5	0.9999	0.9999	0.3057	0.9977	0.0775	0.703	0.3057	0.228	0.228	0.9684
		T2 vs. T3	0.9999	0.1644	0.9305	0.9892	0.9999	0.9684	1	0.9999	0.8727	0.9977
		T2 vs. T4	0.7041	0.2064	0.9686	0.3072	0.7041	0.3072	0.9995	0.9995	0.7041	0.9995
		T2 vs. T5	0.9305	0.9892	0.9999	0.7956	0.4965	0.3057	0.703	0.703	0.1147	0.9977
		T3 vs. T4	0.2064	0.9995	1	0.3072	0.9686	0.4304	0.9931	0.9995	0.9686	0.9995
		T3 vs. T5	0.4965	0.228	0.8727	0.8727	0.703	0.3057	0.4965	0.703	1	0.9977
		T4 vs. T5	0.824	0.2064	0.9995	0.0782	0.9931	0.824	0.7041	0.5674	0.7041	0.9139
	Ferrel	T1 vs. T2	0.8727	0.0775	0.3964	0.3057	0.9999	0.7956	0.9305	0.228	0.3964	0.1147
		T1 vs. T3	0.0322	0.1147	0.0775	0.7956	0.8727	0.3057	0.7956	0.703	0.9305	0.9684
		T1 vs. T4	0.1644	0.7956	0.0322	0.8727	0.1308	0.9684	0.9305	0.7956	0.7956	0.703
		T1 vs. T5	0.0775	0.9684	0.8727	0.9684	0.0775	0.9684	0.7956	0.6009	0.9892	0.9977
		T2 vs. T3	0.1147	0.9684	0.9684	0.9892	0.9999	0.9892	0.9999	0.0775	0.228	0.228
		T2 vs. T4	0.4965	0.0322	0.1147	0.9892	0.7041	0.7956	0.7956	0.1644	0.3057	0.0322
		T2 vs. T5	0.4965	0.0775	0.9999	0.228	0.4965	0.7956	0.8727	0.0775	0.1147	0.0775
		T3 vs. T4	0.703	0.0508	0.703	0.9892	0.9686	0.703	0.8727	0.9892	0.9977	0.3964
		T3 vs. T5	0.6009	0.1147	0.9977	0.703	0.703	0.3057	0.703	0.9892	0.8727	0.8727
		T4 vs. T5	1	0.9999	0.3057	0.9892	0.9931	0.9305	0.8727	0.9999	0.9892	0.9305
Top 10 fungal genera	Field	Timepoint comparation	Fusarium	Trichoderma	Gibellulopsis	Actinomucor	Chaetomiaceae_unclassified	Mortierellaceae_unclassified	Cladosporium	Plectosphaerella	Globodera	Lasiosphaeris
	Barnes	T1 vs. T2	0.3057	0.703	0.9977	1	0.8727	0.9977	0.9684	0.3964	0.9676	0.9892
		T1 vs. T3	0.703	0.703	0.9305	1	0.8727	0.3057	0.9305	0.9977	0.074	1
		T1 vs. T4	0.9892	0.3057	0.3057	1	0.8727	0.9892	0.1644	0.703	0.5307	0.9999
		T1 vs. T5	0.703	0.6009	0.7956	1	0.8727	0.0322	1	0.7956	0.6088	0.228
		T2 vs. T3	0.0322	0.9684	0.8727	1	0.9892	0.703	0.9977	0.3964	0.1644	0.9999
		T2 vs. T4	0.4965	0.4965	0.3964	1	1	0.9999	0.0775	0.3057	0.7956	0.9305
		T2 vs. T5	0.0775	0.9305	0.703	1	0.9999	0.0322	0.9684	0.0322	0.0235	0.703
		T3 vs. T4	0.0508	1	0.6009	1	0.9977	0.7956	0.228	0.703	0.6009	0.9892
		T3 vs. T5	0.8727	0.9684	0.9977	1	0.9892	0.6009	0.8727	0.9305	0.0235	0.228
		T4 vs. T5	0.228	0.8727	0.9305	1	0.9999	0.703	0.228	0.9684	0.0955	0.0322
	C&C	T1 vs. T2	0.0322	0.703	0.0508	0.7913	0.9977	0.0322	0.9999	0.0508	0.9301	0.9123
		T1 vs. T3	0.0322	0.703	0.9977	0.482	0.1147	0.0322	0.7956	0.9892	0.1644	0.8329
		T1 vs. T4	0.9686	0.5674	0.7041	0.1532	0.1308	0.0782	0.9995	0.9931	0.9139	1
		T1 vs. T5	0.9305	0.228	0.8727	0.248	0.4965	0.9684	0.8727	0.9305	0.9999	0.9837
		T2 vs. T3	0.1644	0.228	0.703	0.7219	0.7956	0.1644	0.9305	0.228	0.9301	0.9999
		T2 vs. T4	0.2064	0.4304	0.3072	0.3057	0.9931	0.4304	0.9995	0.2064	1	0.9345
		T2 vs. T5	0.3057	1	0.7956	0.8572	0.9892	0.0508	0.4965	0.4965	0.872	0.9702
		T3 vs. T4	0.0482	1	0.9931	0.9257	0.9686	0.9686	0.824	1	0.4304	0.8323
		T3 vs. T5	0.0322	0.0775	0.9892	0.9123	0.9684	0.0322	0.3964	0.9684	0.703	0.9702
		T4 vs. T5	0.9995	0.0782	0.9931	0.5142	1	0.0782	0.9139	0.9686	0.9686	0.9892
	Ferrel	T1 vs. T2	0.1644	0.1147	0.9999	0.9977	0.703	0.9892	0.0775	0.0322	0.5774	0.163
		T1 vs. T3	0.6009	0.1147	0.8727	0.3964	0.703	0.9977	0.0508	0.9977	0.5774	0.703
		T1 vs. T4	0.0508	0.9892	0.9684	0.9684	0.6009	0.0775	0.0322	0.3057	0.1492	0.6974
		T1 vs. T5	0.703	0.6009	0.0322	0.9977	0.6009	0.3057	0.0322	1	0.5774	0.9682
		T2 vs. T3	0.9684	0.9892	0.9684	0.8727	0.6009	0.8727	0.6009	0.4965	0.9955	0.0501
		T2 vs. T4	0.9977	0.6009	1	0.9892	0.9305	0.1147	0.0322	1	0.6486	0.9998
		T2 vs. T5	0.8727	0.8727	0.1147	0.9977	0.9684	0.228	0.7956	0.4965	0.9955	0.7847
		T3 vs. T4	0.703	0.3964	0.9892	0.9977	0.3964	0.228	0.3057	0.7956	0.9971	0.2986
		T3 vs. T5	0.9977	0.4965	0.4965	0.9305	0.703	0.4965	0.9305	0.9977	0.9997	0.4947
		T4 vs. T5	0.4965	0.9999	0.7956	0.9999	0.9305	0.9684	0.0775	0.703	0.9861	0.9998
	P < 0.05

## Sheet: Data_5
Supplementary Data 5. Bacterial and Fungal OTUs associaated with P. nicotianae identified by SparCC-based co-occurrence networks (|r| >= 0.5, P < 0.01)
Location	Source	Target	Corr	Pval	Sign	Kingdom	Phylum	Class	Order	Family	Genus
Barnes	Phn	Otu000057	-0.550084	0.01	negative	Bacteria	Proteobacteria	Alphaproteobacteria	Rhizobiales	Devosiaceae	Devosia
Barnes	Phn	Otu000058	-0.527918	0.01	negative	Bacteria	Proteobacteria	Alphaproteobacteria	Rhizobiales	Xanthobacteraceae	Xanthobacteraceae_unclassified
Barnes	Phn	Otu000095	-0.584373	0.01	negative	Bacteria	Proteobacteria	Gammaproteobacteria	Xanthomonadales	Rhodanobacteraceae	Chujaibacter
Barnes	Phn	Otu000162	0.620443	0.01	positive	Bacteria	Actinobacteriota	Actinobacteria	Pseudonocardiales	Pseudonocardiaceae	Amycolatopsis
Barnes	Phn	Otu000192	-0.561992	0.01	negative	Bacteria	Acidobacteriota	Acidobacteriae	Acidobacteriales	uncultured	uncultured_ge
Barnes	Phn	Otu000204	0.57095	0.01	positive	Bacteria	Actinobacteriota	Thermoleophilia	Solirubrobacterales	Solirubrobacteraceae	Conexibacter
Barnes	Phn	Otu000244	-0.533549	0.01	negative	Bacteria	Proteobacteria	Alphaproteobacteria	Azospirillales	uncultured	uncultured_ge
Barnes	Phn	Otu000270	-0.548811	0.01	negative	Bacteria	Proteobacteria	Gammaproteobacteria	Xanthomonadales	Rhodanobacteraceae	Rhodanobacter
Barnes	Phn	Otu000289	-0.517582	0.01	negative	Bacteria	Actinobacteriota	Thermoleophilia	Gaiellales	uncultured	uncultured_ge
Barnes	Phn	Otu000335	-0.53655	0.01	negative	Bacteria	Chloroflexi	JG30-KF-CM66	JG30-KF-CM66_or	JG30-KF-CM66_fa	JG30-KF-CM66_ge
Barnes	Phn	Otu000337	-0.503456	0.01	negative	Bacteria	Firmicutes	Bacilli	Paenibacillales	Paenibacillaceae	Cohnella
Barnes	Phn	Otu000394	0.512155	0.01	positive	Bacteria	Actinobacteriota	Actinobacteria	Corynebacteriales	Nocardiaceae	Gordonia
Barnes	Phn	Otu000447	-0.505556	0.01	negative	Bacteria	Bacteroidota	Bacteroidia	Chitinophagales	Chitinophagaceae	uncultured
Barnes	Phn	Otu000451	0.535515	0.01	positive	Bacteria	Actinobacteriota	Actinobacteria	Frankiales	Geodermatophilaceae	Geodermatophilus
Barnes	Phn	Otu000453	0.514838	0.01	positive	Bacteria	Actinobacteriota	Actinobacteria	Corynebacteriales	Nocardiaceae	Rhodococcus
Barnes	Phn	Otu000542	-0.597515	0.01	negative	Bacteria	Proteobacteria	Gammaproteobacteria	Burkholderiales	A21b	A21b_ge
Barnes	Phn	Otu000624	-0.585761	0.01	negative	Bacteria	Acidobacteriota	Acidobacteriae	Subgroup_2	Subgroup_2_fa	Subgroup_2_ge
Barnes	Phn	Otu000643	-0.530951	0.01	negative	Bacteria	Firmicutes	Bacilli	Paenibacillales	Paenibacillaceae	Paenibacillus
Barnes	Phn	Otu000664	-0.519492	0.01	negative	Bacteria	Proteobacteria	Alphaproteobacteria	uncultured	uncultured_fa	uncultured_ge
Barnes	Phn	Otu000751	0.535432	0.01	positive	Bacteria	Gemmatimonadota	Gemmatimonadetes	Gemmatimonadales	Gemmatimonadaceae	Gemmatimonadaceae_unclassified
Barnes	Phn	Otu000854	0.590151	0.01	positive	Bacteria	Proteobacteria	Alphaproteobacteria	Caulobacterales	Caulobacteraceae	uncultured
Barnes	Phn	Otu001026	-0.51833	0.01	negative	Bacteria	Acidobacteriota	Acidobacteriae	Subgroup_2	Subgroup_2_fa	Subgroup_2_ge
Barnes	Phn	Otu001029	-0.503145	0.01	negative	Bacteria	Proteobacteria	Alphaproteobacteria	Elsterales	uncultured	uncultured_ge
Barnes	Phn	Otu001240	-0.662932	0.01	negative	Bacteria	Proteobacteria	Gammaproteobacteria	Burkholderiales	SC-I-84	SC-I-84_ge
Barnes	Phn	Otu001305	0.509036	0.01	positive	Bacteria	Actinobacteriota	Thermoleophilia	Solirubrobacterales	Solirubrobacterales_unclassified	Solirubrobacterales_unclassified
Barnes	Phn	Otu001481	0.542906	0.01	positive	Bacteria	Acidobacteriota	Vicinamibacteria	Vicinamibacterales	Vicinamibacterales_unclassified	Vicinamibacterales_unclassified
Barnes	Phn	Otu001533	0.560711	0.01	positive	Bacteria	Acidobacteriota	Vicinamibacteria	Vicinamibacterales	Vicinamibacterales_unclassified	Vicinamibacterales_unclassified
Barnes	Phn	Otu001551	-0.526506	0.01	negative	Bacteria	Firmicutes	Clostridia	Clostridiales	Clostridiaceae	Clostridium_sensu_stricto_8
Barnes	Phn	Otu001847	-0.518497	0.01	negative	Bacteria	Proteobacteria	Alphaproteobacteria	Caulobacterales	Caulobacteraceae	Asticcacaulis
Barnes	Phn	Otu001941	0.566006	0.01	positive	Bacteria	Acidobacteriota	Vicinamibacteria	Vicinamibacterales	uncultured	uncultured_ge
C&C	Phn	Otu000381	-0.544847	0.01	negative	Bacteria	Gemmatimonadota	Gemmatimonadetes	Gemmatimonadales	Gemmatimonadaceae	Gemmatimonas
C&C	Phn	Otu000533	-0.5358	0.01	negative	Bacteria	Acidobacteriota	Acidobacteriae	Bryobacterales	Bryobacteraceae	Bryobacter
C&C	Phn	Otu000620	-0.505913	0.01	negative	Bacteria	Acidobacteriota	Acidobacteriae	Acidobacteriales	uncultured	uncultured_ge
C&C	Phn	Otu000894	-0.56412	0.01	negative	Bacteria	Proteobacteria	Gammaproteobacteria	Burkholderiales	Oxalobacteraceae	Noviherbaspirillum
C&C	Phn	Otu001339	-0.506788	0.01	negative	Bacteria	Proteobacteria	Alphaproteobacteria	Dongiales	Dongiaceae	Dongia
C&C	Phn	Otu002323	-0.551653	0.01	negative	Bacteria	Gemmatimonadota	Gemmatimonadetes	Gemmatimonadales	Gemmatimonadaceae	Gemmatimonas
C&C	Phn	Otu000198	0.577818	0.01	positive	Bacteria	Chloroflexi	Chloroflexia	Thermomicrobiales	JG30-KF-CM45	JG30-KF-CM45_ge
C&C	Phn	Otu000364	0.597677	0.01	positive	Bacteria	Chloroflexi	Chloroflexia	Chloroflexales	Roseiflexaceae	uncultured
C&C	Phn	Otu000766	0.580534	0.01	positive	Bacteria	Actinobacteriota	Acidimicrobiia	Microtrichales	Iamiaceae	Iamia
C&C	Phn	Otu000818	0.543192	0.01	positive	Bacteria	Chloroflexi	Chloroflexia	Thermomicrobiales	AKYG1722	AKYG1722_ge
C&C	Phn	Otu000868	0.694041	0.01	positive	Bacteria	Firmicutes	Bacilli	Bacillales	Bacillaceae	Terribacillus
C&C	Phn	Otu000936	0.525846	0.01	positive	Bacteria	Proteobacteria	Alphaproteobacteria	Tistrellales	Geminicoccaceae	Candidatus_Alysiosphaera
C&C	Phn	Otu001607	0.549028	0.01	positive	Bacteria	Proteobacteria	Gammaproteobacteria	Burkholderiales	SC-I-84	SC-I-84_ge
Ferrel	Phn	Otu000036	-0.60547	0.01	negative	Bacteria	Firmicutes	Bacilli	Bacillales	Bacillaceae	Bacillus
Ferrel	Phn	Otu000051	-0.505797	0.01	negative	Bacteria	Actinobacteriota	Actinobacteria	Frankiales	Frankiaceae	Jatrophihabitans
Ferrel	Phn	Otu000065	-0.564449	0.01	negative	Bacteria	Actinobacteriota	Actinobacteria	Frankiales	Geodermatophilaceae	Geodermatophilus
Ferrel	Phn	Otu000093	-0.506697	0.01	negative	Bacteria	Firmicutes	Bacilli	Alicyclobacillales	Alicyclobacillaceae	Tumebacillus
Ferrel	Phn	Otu000167	-0.583866	0.01	negative	Bacteria	Actinobacteriota	Actinobacteria	Pseudonocardiales	Pseudonocardiaceae	Crossiella
Ferrel	Phn	Otu000269	-0.530937	0.01	negative	Bacteria	Proteobacteria	Gammaproteobacteria	Burkholderiales	SC-I-84	SC-I-84_ge
Ferrel	Phn	Otu000301	-0.535384	0.01	negative	Bacteria	Actinobacteriota	Acidimicrobiia	Acidimicrobiales	Acidimicrobiaceae	uncultured
Ferrel	Phn	Otu000329	-0.547795	0.01	negative	Bacteria	Proteobacteria	Alphaproteobacteria	Tistrellales	Geminicoccaceae	Candidatus_Alysiosphaera
Ferrel	Phn	Otu000380	-0.547334	0.01	negative	Bacteria	Actinobacteriota	Thermoleophilia	Gaiellales	Gaiellaceae	Gaiella
Ferrel	Phn	Otu000440	-0.56401	0.01	negative	Bacteria	Acidobacteriota	Acidobacteriae	Acidobacteriales	uncultured	uncultured_ge
Ferrel	Phn	Otu000450	-0.577158	0.01	negative	Bacteria	Proteobacteria	Alphaproteobacteria	Elsterales	uncultured	uncultured_ge
Ferrel	Phn	Otu000465	-0.516877	0.01	negative	Bacteria	Proteobacteria	Alphaproteobacteria	Sphingomonadales	Sphingomonadaceae	Sphingomonadaceae_unclassified
Ferrel	Phn	Otu000586	-0.500722	0.01	negative	Bacteria	Proteobacteria	Gammaproteobacteria	Burkholderiales	Burkholderiaceae	Burkholderia-Caballeronia-Paraburkholderia
Ferrel	Phn	Otu001029	-0.522495	0.01	negative	Bacteria	Proteobacteria	Alphaproteobacteria	Elsterales	uncultured	uncultured_ge
Ferrel	Phn	Otu001085	-0.508841	0.01	negative	Bacteria	Chloroflexi	JG30-KF-CM66	JG30-KF-CM66_or	JG30-KF-CM66_fa	JG30-KF-CM66_ge
Ferrel	Phn	Otu001787	-0.538115	0.01	negative	Bacteria	Gemmatimonadota	Gemmatimonadetes	Gemmatimonadales	Gemmatimonadaceae	Gemmatimonadaceae_unclassified
Ferrel	Phn	Otu001918	-0.54815	0.01	negative	Bacteria	Firmicutes	Bacilli	Bacillales	Bacillaceae	Bacillaceae_unclassified
Ferrel	Phn	Otu004324	-0.501599	0.01	negative	Bacteria	Firmicutes	Bacilli	Bacillales	Planococcaceae	Rummeliibacillus
Ferrel	Phn	Otu000067	0.552773	0.01	positive	Bacteria	Actinobacteriota	Thermoleophilia	Solirubrobacterales	Solirubrobacteraceae	Conexibacter
Ferrel	Phn	Otu000077	0.541644	0.01	positive	Bacteria	Acidobacteriota	Vicinamibacteria	Vicinamibacterales	Vicinamibacteraceae	Vicinamibacteraceae_ge
Ferrel	Phn	Otu000083	0.528897	0.01	positive	Bacteria	Actinobacteriota	Thermoleophilia	Gaiellales	Gaiellaceae	Gaiella
Ferrel	Phn	Otu000114	0.547792	0.01	positive	Bacteria	Proteobacteria	Alphaproteobacteria	Azospirillales	Azospirillaceae	Skermanella
Ferrel	Phn	Otu000197	0.508148	0.01	positive	Bacteria	Actinobacteriota	Actinobacteria	Propionibacteriales	Nocardioidaceae	Kribbella
Ferrel	Phn	Otu000210	0.60113	0.01	positive	Bacteria	Acidobacteriota	Acidobacteriae	Bryobacterales	Bryobacteraceae	Bryobacter
Ferrel	Phn	Otu000240	0.540901	0.01	positive	Bacteria	RCP2-54	RCP2-54_cl	RCP2-54_or	RCP2-54_fa	RCP2-54_ge
Ferrel	Phn	Otu000274	0.551535	0.01	positive	Bacteria	Proteobacteria	Gammaproteobacteria	Gammaproteobacteria_Incertae_Sedis	Unknown_Family	Acidibacter
Ferrel	Phn	Otu000340	0.506045	0.01	positive	Bacteria	Actinobacteriota	Actinobacteria	Pseudonocardiales	Pseudonocardiaceae	Pseudonocardia
Ferrel	Phn	Otu000426	0.582377	0.01	positive	Bacteria	Proteobacteria	Alphaproteobacteria	Rhizobiales	Rhodomicrobiaceae	Rhodomicrobium
Ferrel	Phn	Otu000655	0.512636	0.01	positive	Bacteria	Proteobacteria	Alphaproteobacteria	Rhizobiales	Xanthobacteraceae	Tardiphaga
Ferrel	Phn	Otu000692	0.522291	0.01	positive	Bacteria	Actinobacteriota	Thermoleophilia	Gaiellales	Gaiellales_unclassified	Gaiellales_unclassified
Ferrel	Phn	Otu000697	0.525792	0.01	positive	Bacteria	Chloroflexi	Chloroflexia	Chloroflexales	Roseiflexaceae	uncultured
Ferrel	Phn	Otu000805	0.526907	0.01	positive	Bacteria	Myxococcota	Myxococcia	Myxococcales	Anaeromyxobacteraceae	Anaeromyxobacter
Ferrel	Phn	Otu000852	0.569942	0.01	positive	Bacteria	Acidobacteriota	Vicinamibacteria	Vicinamibacterales	uncultured	uncultured_ge
Ferrel	Phn	Otu001076	0.581317	0.01	positive	Bacteria	Acidobacteriota	Acidobacteriae	Solibacterales	Solibacteraceae	Candidatus_Solibacter
Ferrel	Phn	Otu001226	0.517509	0.01	positive	Bacteria	Chloroflexi	Chloroflexia	Chloroflexales	Roseiflexaceae	uncultured
Ferrel	Phn	Otu001274	0.578142	0.01	positive	Bacteria	Gemmatimonadota	Gemmatimonadetes	Gemmatimonadales	Gemmatimonadaceae	Gemmatimonadaceae_unclassified
Ferrel	Phn	Otu001277	0.590396	0.01	positive	Bacteria	Chloroflexi	TK10	TK10_or	TK10_fa	TK10_ge
Ferrel	Phn	Otu001285	0.54854	0.01	positive	Bacteria	Proteobacteria	Gammaproteobacteria	Burkholderiales	A21b	A21b_ge
Ferrel	Phn	Otu001527	0.565218	0.01	positive	Bacteria	Chloroflexi	Chloroflexia	Chloroflexales	Roseiflexaceae	uncultured
Ferrel	Phn	Otu001713	0.521212	0.01	positive	Bacteria	Acidobacteriota	Vicinamibacteria	Vicinamibacterales	uncultured	uncultured_ge
Ferrel	Phn	Otu001718	0.590062	0.01	positive	Bacteria	Methylomirabilota	Methylomirabilia	Rokubacteriales	Rokubacteriales_fa	Rokubacteriales_ge
Ferrel	Phn	Otu001779	0.51952	0.01	positive	Bacteria	Myxococcota	Myxococcia	Myxococcales	Anaeromyxobacteraceae	Anaeromyxobacter
Ferrel	Phn	Otu002353	0.518639	0.01	positive	Bacteria	Chloroflexi	Ktedonobacteria	C0119	C0119_fa	C0119_ge
Ferrel	Phn	Otu002860	0.500892	0.01	positive	Bacteria	Proteobacteria	Alphaproteobacteria	Sphingomonadales	Sphingomonadaceae	Sphingomonas
Ferrel	Phn	Otu003087	0.548169	0.01	positive	Bacteria	Latescibacterota	Latescibacterota_cl	Latescibacterota_or	Latescibacterota_fa	Latescibacterota_ge
Ferrel	Phn	Otu004021	0.548528	0.01	positive	Bacteria	Gemmatimonadota	Gemmatimonadetes	Gemmatimonadales	Gemmatimonadaceae	uncultured
Ferrel	Phn	Otu004156	0.544859	0.01	positive	Bacteria	Chloroflexi	Chloroflexia	Chloroflexales	Roseiflexaceae	uncultured
Barnes	Phn	Otu000138	-0.550152	0.01	negative	Fungi	Ascomycota	Leotiomycetes	Helotiales	Tricladiaceae	Halenospora
Barnes	Phn	Otu000039	0.510403	0.01	positive	Fungi	unclassified	unclassified	unclassified	unclassified	unclassified
C&C	Phn	Otu000009	-0.520639	0.01	negative	Fungi	Ascomycota	Dothideomycetes	Capnodiales	Cladosporiaceae	Cladosporium
C&C	Phn	Otu000063	-0.578722	0.01	negative	Fungi	Mucoromycota	Mucoromycetes	Mucorales	Mucoraceae	Mucor
C&C	Phn	Otu000188	-0.509649	0.01	negative	Fungi	Ascomycota	Dothideomycetes	Pleosporales	Tetraplosphaeriaceae	Tetraploa
C&C	Phn	Otu000334	-0.576123	0.01	negative	Fungi	Basidiomycota	Tremellomycetes	Tremellales	Bulleribasidiaceae	Vishniacozyma
C&C	Phn	Otu001243	-0.535063	0.01	negative	Fungi	Ascomycota	Sordariomycetes	Sordariales	Chaetomiaceae	Chaetomiaceae_unclassified
C&C	Phn	Otu000014	0.55456	0.01	positive	Fungi	Ascomycota	Sordariomycetes	Sordariales	Lasiosphaeriaceae	Schizothecium
C&C	Phn	Otu000028	0.536116	0.01	positive	Fungi	Basidiomycota	Agaricomycetes	Phallales	Phallaceae	Phallus
Ferrel	Phn	Otu000043	-0.506078	0.01	negative	Fungi	Ascomycota	Sordariomycetes	Hypocreales	Hypocreales_fam_Incertae_sedis	Emericellopsis
Ferrel	Phn	Otu000094	-0.535851	0.01	negative	Fungi	Ascomycota	Dothideomycetes	Pleosporales	Massarinaceae	Stagonospora
Ferrel	Phn	Otu000100	-0.506298	0.01	negative	Fungi	Fungi_unclassified	Fungi_unclassified	Fungi_unclassified	Fungi_unclassified	Fungi_unclassified
Ferrel	Phn	Otu000111	0.538236	0.01	positive	Fungi	Ascomycota	Eurotiomycetes	Eurotiales	Aspergillaceae	Talaromyces
Ferrel	Phn	Otu000197	-0.542301	0.01	negative	Fungi	Ascomycota	Dothideomycetes	Mycosphaerellales	Extremaceae	Extremopsis
Ferrel	Phn	Otu000211	0.532748	0.01	positive	Fungi	Ascomycota	Sordariomycetes	Xylariales	Sporocadaceae	Robillarda
Ferrel	Phn	Otu000214	0.516943	0.01	positive	Fungi	Ascomycota	Sordariomycetes	Hypocreales	Hypocreales_unclassified	Hypocreales_unclassified
Ferrel	Phn	Otu000232	-0.547692	0.01	negative	Fungi	Ascomycota	Sordariomycetes	Sordariales	Chaetomiaceae	Microthielavia
Ferrel	Phn	Otu000252	0.524294	0.01	positive	Fungi	Ascomycota	Dothideomycetes	Pleosporales	Lindgomycetaceae	Lindgomycetaceae_unclassified
Ferrel	Phn	Otu000437	0.515306	0.01	positive	Fungi	Ascomycota	Leotiomycetes	Helotiales	Helotiales_unclassified	Helotiales_unclassified
Ferrel	Phn	Otu000468	0.536684	0.01	positive	Fungi	Ascomycota	Eurotiomycetes	Eurotiales	Trichocomaceae	Sagenomella
Ferrel	Phn	Otu000531	-0.500296	0.01	negative	Fungi	Ascomycota	Eurotiomycetes	Onygenales	Onygenales_fam_Incertae_sedis	Spiromastix
Ferrel	Phn	Otu000773	-0.501223	0.01	negative	Fungi	Ascomycota	Eurotiomycetes	Eurotiales	Aspergillaceae	Aspergillaceae_unclassified
Ferrel	Phn	Otu001060	-0.547098	0.01	negative	Fungi	Fungi_unclassified	Fungi_unclassified	Fungi_unclassified	Fungi_unclassified	Fungi_unclassified
Ferrel	Phn	Otu001073	-0.528534	0.01	negative	Fungi	Fungi_unclassified	Fungi_unclassified	Fungi_unclassified	Fungi_unclassified	Fungi_unclassified
