# Supplementary material
Source: Research Square preprint supplement (doi:10.21203/rs.3.rs-9011956/v1)
Supplement: Supplementary file 2 [file f15dfac98f71af7fb37c9518.xlsx]

## Sheet: Fig.3ABC, Fig.5AB;Fig.S2A;FigS4
Source Data 1. Taxonomic information for 16S OTUs.
OTU	Kingdom	Phylum	Class	Order	Family	Genus
Otu000001	Bacteria	Actinobacteriota	Actinobacteria	Micrococcales	Micrococcaceae	Pseudarthrobacter
Otu000002	Bacteria	Proteobacteria	Alphaproteobacteria	Sphingomonadales	Sphingomonadaceae	Sphingomonas
Otu000003	Bacteria	Proteobacteria	Alphaproteobacteria	Rhizobiales	Xanthobacteraceae	Bradyrhizobium
Otu000004	Bacteria	Firmicutes	Bacilli	Bacillales	Bacillaceae	Bacillus
Otu000005	Bacteria	Actinobacteriota	Actinobacteria	Streptomycetales	Streptomycetaceae	Streptomyces
Otu000006	Bacteria	Actinobacteriota	Actinobacteria	Micrococcales	Micrococcaceae	Micrococcaceae_unclassified
Otu000007	Bacteria	Proteobacteria	Alphaproteobacteria	Rhizobiales	Xanthobacteraceae	Xanthobacteraceae_unclassified
Otu000008	Bacteria	Proteobacteria	Alphaproteobacteria	Rhizobiales	Xanthobacteraceae	uncultured
Otu000009	Bacteria	Actinobacteriota	Actinobacteria	Micrococcales	Intrasporangiaceae	Intrasporangiaceae_unclassified
Otu000010	Bacteria	Proteobacteria	Gammaproteobacteria	Pseudomonadales	Pseudomonadaceae	Pseudomonas
Otu000011	Bacteria	Firmicutes	Bacilli	Bacillales	Bacillaceae	Bacillus
Otu000012	Bacteria	Actinobacteriota	Actinobacteria	Propionibacteriales	Nocardioidaceae	Marmoricola
Otu000013	Bacteria	Actinobacteriota	Thermoleophilia	Solirubrobacterales	Solirubrobacteraceae	Solirubrobacter
Otu000014	Bacteria	Proteobacteria	Alphaproteobacteria	Rhizobiales	Methyloligellaceae	uncultured
Otu000015	Bacteria	Actinobacteriota	Thermoleophilia	Gaiellales	uncultured	uncultured_ge
Otu000016	Bacteria	Firmicutes	Bacilli	Bacillales	Bacillales_unclassified	Bacillales_unclassified
Otu000017	Bacteria	Actinobacteriota	Actinobacteria	Micrococcales	Micrococcaceae	Paenarthrobacter
Otu000018	Bacteria	Actinobacteriota	Actinobacteria	Corynebacteriales	Mycobacteriaceae	Mycobacterium
Otu000019	Bacteria	Actinobacteriota	Actinobacteria	Corynebacteriales	Mycobacteriaceae	Mycobacterium
Otu000020	Bacteria	Chloroflexi	KD4-96	KD4-96_or	KD4-96_fa	KD4-96_ge
Otu000021	Bacteria	Actinobacteriota	Thermoleophilia	Gaiellales	Gaiellaceae	Gaiella
Otu000022	Bacteria	Actinobacteriota	Actinobacteria	Micrococcales	Microbacteriaceae	Microbacterium
Otu000023	Bacteria	Actinobacteriota	Actinobacteria	Micrococcales	Intrasporangiaceae	Terrabacter
Otu000024	Bacteria	Actinobacteriota	Actinobacteria	Pseudonocardiales	Pseudonocardiaceae	Pseudonocardia
Otu000025	Bacteria	Actinobacteriota	Thermoleophilia	Gaiellales	Gaiellales_unclassified	Gaiellales_unclassified
Otu000026	Bacteria	Acidobacteriota	Acidobacteriae	Solibacterales	Solibacteraceae	Candidatus_Solibacter
Otu000027	Bacteria	Proteobacteria	Alphaproteobacteria	Rhizobiales	Xanthobacteraceae	uncultured
Otu000028	Bacteria	Firmicutes	Bacilli	Bacillales	Bacillaceae	Bacillus
Otu000029	Bacteria	Actinobacteriota	Thermoleophilia	Solirubrobacterales	67-14	67-14_ge
Otu000030	Bacteria	Actinobacteriota	Actinobacteria	Streptomycetales	Streptomycetaceae	Streptomycetaceae_unclassified
Otu000031	Bacteria	Actinobacteriota	Thermoleophilia	Solirubrobacterales	Solirubrobacteraceae	Conexibacter
Otu000032	Bacteria	Actinobacteriota	Thermoleophilia	Solirubrobacterales	67-14	67-14_ge
Otu000033	Bacteria	Actinobacteriota	Thermoleophilia	Gaiellales	uncultured	uncultured_ge
Otu000034	Bacteria	Actinobacteriota	Thermoleophilia	Gaiellales	uncultured	uncultured_ge
Otu000035	Bacteria	Actinobacteriota	Actinobacteria	Frankiales	Frankiaceae	Jatrophihabitans
Otu000036	Bacteria	Firmicutes	Bacilli	Bacillales	Bacillaceae	Bacillus
Otu000037	Bacteria	Actinobacteriota	Actinobacteria	Frankiales	Geodermatophilaceae	Blastococcus
Otu000038	Bacteria	Chloroflexi	Chloroflexia	Chloroflexales	Roseiflexaceae	uncultured
Otu000039	Bacteria	Proteobacteria	Alphaproteobacteria	Rhizobiales	Rhizobiaceae	Mesorhizobium
Otu000040	Bacteria	Actinobacteriota	Actinobacteria	Micrococcales	Microbacteriaceae	Microbacteriaceae_unclassified
Otu000041	Bacteria	Actinobacteriota	Actinobacteria	Propionibacteriales	Nocardioidaceae	Nocardioides
Otu000042	Bacteria	Actinobacteriota	Actinobacteria	Micromonosporales	Micromonosporaceae	Micromonosporaceae_unclassified
Otu000043	Bacteria	Actinobacteriota	Actinobacteria	Micrococcales	Intrasporangiaceae	Pedococcus-Phycicoccus
Otu000044	Bacteria	Proteobacteria	Alphaproteobacteria	Rhizobiales	Rhizobiaceae	Allorhizobium-Neorhizobium-Pararhizobium-Rhizobium
Otu000045	Bacteria	Gemmatimonadota	Gemmatimonadetes	Gemmatimonadales	Gemmatimonadaceae	uncultured
Otu000046	Bacteria	Proteobacteria	Gammaproteobacteria	Burkholderiales	Oxalobacteraceae	Massilia
Otu000047	Bacteria	Actinobacteriota	Actinobacteria	Streptomycetales	Streptomycetaceae	Streptomyces
Otu000048	Bacteria	Actinobacteriota	Actinobacteria	Frankiales	Acidothermaceae	Acidothermus
Otu000049	Bacteria	Proteobacteria	Gammaproteobacteria	Pseudomonadales	Pseudomonadaceae	Pseudomonas
Otu000050	Bacteria	Acidobacteriota	Vicinamibacteria	Vicinamibacterales	uncultured	uncultured_ge
Otu000051	Bacteria	Actinobacteriota	Actinobacteria	Frankiales	Frankiaceae	Jatrophihabitans
Otu000052	Bacteria	Actinobacteriota	Actinobacteria	Propionibacteriales	Nocardioidaceae	Nocardioides
Otu000053	Bacteria	Proteobacteria	Gammaproteobacteria	Pseudomonadales	Pseudomonadaceae	Pseudomonas
Otu000054	Bacteria	Proteobacteria	Alphaproteobacteria	Rhizobiales	Xanthobacteraceae	Rhodoplanes
Otu000055	Bacteria	Proteobacteria	Alphaproteobacteria	Rhizobiales	Hyphomicrobiaceae	Pedomicrobium
Otu000056	Bacteria	Gemmatimonadota	Gemmatimonadetes	Gemmatimonadales	Gemmatimonadaceae	uncultured
Otu000057	Bacteria	Proteobacteria	Alphaproteobacteria	Rhizobiales	Devosiaceae	Devosia
Otu000058	Bacteria	Proteobacteria	Alphaproteobacteria	Rhizobiales	Xanthobacteraceae	Xanthobacteraceae_unclassified
Otu000059	Bacteria	Actinobacteriota	Actinobacteria	Micromonosporales	Micromonosporaceae	Micromonosporaceae_unclassified
Otu000060	Bacteria	Proteobacteria	Alphaproteobacteria	Rhizobiales	Hyphomicrobiaceae	Hyphomicrobium
Otu000061	Bacteria	Proteobacteria	Gammaproteobacteria	Gammaproteobacteria_Incertae_Sedis	Unknown_Family	Acidibacter
Otu000062	Bacteria	Actinobacteriota	Actinobacteria	Micrococcales	Cellulomonadaceae	Cellulomonas
Otu000063	Bacteria	Actinobacteriota	Thermoleophilia	Gaiellales	uncultured	uncultured_ge
Otu000064	Bacteria	Firmicutes	Bacilli	Bacillales	Bacillaceae	Bacillus
Otu000065	Bacteria	Actinobacteriota	Actinobacteria	Frankiales	Geodermatophilaceae	Geodermatophilus
Otu000066	Bacteria	Acidobacteriota	Acidobacteriae	Bryobacterales	Bryobacteraceae	Bryobacter
Otu000067	Bacteria	Actinobacteriota	Thermoleophilia	Solirubrobacterales	Solirubrobacteraceae	Conexibacter
Otu000068	Bacteria	Acidobacteriota	Blastocatellia	Pyrinomonadales	Pyrinomonadaceae	RB41
Otu000069	Bacteria	Actinobacteriota	Actinobacteria	Propionibacteriales	Propionibacteriaceae	Microlunatus
Otu000070	Bacteria	Actinobacteriota	Actinobacteria	Streptosporangiales	Thermomonosporaceae	Actinoallomurus
Otu000071	Bacteria	Actinobacteriota	Actinobacteria	Propionibacteriales	Nocardioidaceae	Nocardioides
Otu000072	Bacteria	Actinobacteriota	Actinobacteria	Frankiales	Acidothermaceae	Acidothermus
Otu000073	Bacteria	Actinobacteriota	Thermoleophilia	Gaiellales	uncultured	uncultured_ge
Otu000074	Bacteria	Proteobacteria	Gammaproteobacteria	Burkholderiales	Oxalobacteraceae	Massilia
Otu000075	Bacteria	Proteobacteria	Alphaproteobacteria	Elsterales	uncultured	uncultured_ge
Otu000076	Bacteria	Acidobacteriota	Acidobacteriae	Acidobacteriales	uncultured	uncultured_ge
Otu000077	Bacteria	Acidobacteriota	Vicinamibacteria	Vicinamibacterales	Vicinamibacteraceae	Vicinamibacteraceae_ge
Otu000078	Bacteria	Actinobacteriota	Acidimicrobiia	Microtrichales	Ilumatobacteraceae	uncultured
Otu000079	Bacteria	Proteobacteria	Gammaproteobacteria	Enterobacterales	Erwiniaceae	Pantoea
Otu000080	Bacteria	Actinobacteriota	Actinobacteria	Frankiales	Nakamurellaceae	Nakamurella
Otu000081	Bacteria	Proteobacteria	Gammaproteobacteria	Burkholderiales	Burkholderiaceae	Burkholderia-Caballeronia-Paraburkholderia
Otu000082	Bacteria	Proteobacteria	Alphaproteobacteria	Sphingomonadales	Sphingomonadaceae	Sphingomonas
Otu000083	Bacteria	Actinobacteriota	Thermoleophilia	Gaiellales	Gaiellaceae	Gaiella
Otu000084	Bacteria	Actinobacteriota	Actinobacteria	Micrococcales	Microbacteriaceae	Leifsonia
Otu000085	Bacteria	Firmicutes	Bacilli	Bacillales	Bacillaceae	Bacillaceae_unclassified
Otu000086	Bacteria	Proteobacteria	Alphaproteobacteria	Rhizobiales	Xanthobacteraceae	Pseudolabrys
Otu000087	Bacteria	Actinobacteriota	Actinobacteria	Frankiales	uncultured	uncultured_ge
Otu000088	Bacteria	Actinobacteriota	Thermoleophilia	Gaiellales	Gaiellales_unclassified	Gaiellales_unclassified
Otu000089	Bacteria	Actinobacteriota	Actinobacteria	Frankiales	Geodermatophilaceae	Geodermatophilaceae_unclassified
Otu000090	Bacteria	Proteobacteria	Gammaproteobacteria	Burkholderiales	Burkholderiaceae	Burkholderia-Caballeronia-Paraburkholderia
Otu000091	Bacteria	Actinobacteriota	Thermoleophilia	Gaiellales	Gaiellaceae	Gaiella
Otu000092	Bacteria	Actinobacteriota	Thermoleophilia	Gaiellales	uncultured	uncultured_ge
Otu000093	Bacteria	Firmicutes	Bacilli	Alicyclobacillales	Alicyclobacillaceae	Tumebacillus
Otu000094	Bacteria	Actinobacteriota	Thermoleophilia	Solirubrobacterales	67-14	67-14_ge
Otu000095	Bacteria	Proteobacteria	Gammaproteobacteria	Xanthomonadales	Rhodanobacteraceae	Chujaibacter
Otu000096	Bacteria	Actinobacteriota	Actinobacteria	Propionibacteriales	Nocardioidaceae	Nocardioides
Otu000097	Bacteria	Actinobacteriota	Thermoleophilia	Solirubrobacterales	Solirubrobacteraceae	Conexibacter
Otu000098	Bacteria	Chloroflexi	KD4-96	KD4-96_or	KD4-96_fa	KD4-96_ge
Otu000099	Bacteria	Actinobacteriota	Thermoleophilia	Solirubrobacterales	Solirubrobacteraceae	Solirubrobacter
Otu000100	Bacteria	Proteobacteria	Alphaproteobacteria	Rhizobiales	Beijerinckiaceae	Microvirga
Otu000101	Bacteria	Actinobacteriota	Thermoleophilia	Solirubrobacterales	67-14	67-14_ge
Otu000102	Bacteria	Proteobacteria	Alphaproteobacteria	Sphingomonadales	Sphingomonadaceae	Ellin6055
Otu000103	Bacteria	Actinobacteriota	Actinobacteria	Micromonosporales	Micromonosporaceae	Actinoplanes
Otu000104	Bacteria	Proteobacteria	Gammaproteobacteria	Burkholderiales	SC-I-84	SC-I-84_ge
Otu000105	Bacteria	Actinobacteriota	Thermoleophilia	Gaiellales	uncultured	uncultured_ge
Otu000106	Bacteria	Acidobacteriota	Vicinamibacteria	Vicinamibacterales	uncultured	uncultured_ge
Otu000107	Bacteria	Proteobacteria	Gammaproteobacteria	Pseudomonadales	Moraxellaceae	Acinetobacter
Otu000108	Bacteria	Proteobacteria	Alphaproteobacteria	Sphingomonadales	Sphingomonadaceae	Sphingomonas
Otu000109	Bacteria	Proteobacteria	Alphaproteobacteria	Caulobacterales	Caulobacteraceae	Phenylobacterium
Otu000110	Bacteria	Proteobacteria	Alphaproteobacteria	Rhizobiales	Xanthobacteraceae	Pseudolabrys
Otu000111	Bacteria	Proteobacteria	Alphaproteobacteria	Rhizobiales	Beijerinckiaceae	Methylobacterium-Methylorubrum
Otu000112	Bacteria	Actinobacteriota	Thermoleophilia	Gaiellales	Gaiellales_unclassified	Gaiellales_unclassified
Otu000113	Bacteria	Actinobacteriota	Actinobacteria	Streptomycetales	Streptomycetaceae	Kitasatospora
Otu000114	Bacteria	Proteobacteria	Alphaproteobacteria	Azospirillales	Azospirillaceae	Skermanella
Otu000115	Bacteria	Actinobacteriota	Thermoleophilia	Solirubrobacterales	Solirubrobacteraceae	Solirubrobacter
Otu000116	Bacteria	Proteobacteria	Alphaproteobacteria	Rhizobiales	Xanthobacteraceae	Xanthobacteraceae_unclassified
Otu000117	Bacteria	Actinobacteriota	Actinobacteria	Micrococcales	Intrasporangiaceae	Janibacter
Otu000118	Bacteria	Actinobacteriota	Actinobacteria	Corynebacteriales	Mycobacteriaceae	Mycobacterium
Otu000119	Bacteria	Firmicutes	Bacilli	Bacillales	Planococcaceae	Sporosarcina
Otu000120	Bacteria	Actinobacteriota	Thermoleophilia	Solirubrobacterales	Solirubrobacteraceae	Conexibacter
Otu000121	Bacteria	Actinobacteriota	Thermoleophilia	Solirubrobacterales	67-14	67-14_ge
Otu000122	Bacteria	Actinobacteriota	Thermoleophilia	Solirubrobacterales	Solirubrobacteraceae	uncultured
Otu000123	Bacteria	Firmicutes	Bacilli	Alicyclobacillales	Alicyclobacillaceae	Tumebacillus
Otu000124	Bacteria	Chloroflexi	Chloroflexia	Thermomicrobiales	JG30-KF-CM45	JG30-KF-CM45_ge
Otu000125	Bacteria	Actinobacteriota	Actinobacteria	Propionibacteriales	Nocardioidaceae	Nocardioides
Otu000126	Bacteria	Actinobacteriota	Actinobacteria	Frankiales	Acidothermaceae	Acidothermus
Otu000127	Bacteria	Actinobacteriota	Thermoleophilia	Gaiellales	uncultured	uncultured_ge
Otu000128	Bacteria	Actinobacteriota	Actinobacteria	Propionibacteriales	Nocardioidaceae	Nocardioides
Otu000129	Bacteria	Actinobacteriota	Thermoleophilia	Gaiellales	uncultured	uncultured_ge
Otu000130	Bacteria	Nitrospirota	Nitrospiria	Nitrospirales	Nitrospiraceae	Nitrospira
Otu000131	Bacteria	Actinobacteriota	Thermoleophilia	Solirubrobacterales	Solirubrobacteraceae	Solirubrobacter
Otu000132	Bacteria	Proteobacteria	Gammaproteobacteria	Burkholderiales	Comamonadaceae	Comamonadaceae_unclassified
Otu000133	Bacteria	Actinobacteriota	Actinobacteria	Frankiales	Frankiales_unclassified	Frankiales_unclassified
Otu000134	Bacteria	Actinobacteriota	Thermoleophilia	Gaiellales	uncultured	uncultured_ge
Otu000135	Bacteria	Proteobacteria	Alphaproteobacteria	Reyranellales	Reyranellaceae	Reyranella
Otu000136	Bacteria	Actinobacteriota	Thermoleophilia	Gaiellales	uncultured	uncultured_ge
Otu000137	Bacteria	Actinobacteriota	Acidimicrobiia	IMCC26256	IMCC26256_fa	IMCC26256_ge
Otu000138	Bacteria	Proteobacteria	Gammaproteobacteria	Pseudomonadales	Pseudomonadaceae	Pseudomonas
Otu000139	Bacteria	Proteobacteria	Gammaproteobacteria	Burkholderiales	Nitrosomonadaceae	Ellin6067
Otu000140	Bacteria	Acidobacteriota	Acidobacteriae	Acidobacteriales	uncultured	uncultured_ge
Otu000141	Bacteria	Actinobacteriota	Actinobacteria	Propionibacteriales	Nocardioidaceae	Nocardioides
Otu000142	Bacteria	Actinobacteriota	Thermoleophilia	Gaiellales	uncultured	uncultured_ge
Otu000143	Bacteria	Actinobacteriota	Actinobacteria	Propionibacteriales	Nocardioidaceae	Aeromicrobium
Otu000144	Bacteria	Actinobacteriota	Thermoleophilia	Gaiellales	Gaiellaceae	Gaiella
Otu000145	Bacteria	Proteobacteria	Alphaproteobacteria	Micropepsales	Micropepsaceae	uncultured
Otu000146	Bacteria	Actinobacteriota	Thermoleophilia	Solirubrobacterales	Solirubrobacteraceae	Conexibacter
Otu000147	Bacteria	Myxococcota	Polyangia	Haliangiales	Haliangiaceae	Haliangium
Otu000148	Bacteria	Firmicutes	Bacilli	Bacillales	Bacillaceae	Bacillaceae_unclassified
Otu000149	Bacteria	Actinobacteriota	Actinobacteria	Corynebacteriales	Nocardiaceae	Rhodococcus
Otu000150	Bacteria	Actinobacteriota	Actinobacteria	Propionibacteriales	Nocardioidaceae	Marmoricola
Otu000151	Bacteria	Proteobacteria	Alphaproteobacteria	Sphingomonadales	Sphingomonadaceae	Novosphingobium
Otu000152	Bacteria	Chloroflexi	KD4-96	KD4-96_or	KD4-96_fa	KD4-96_ge
Otu000153	Bacteria	Actinobacteriota	Acidimicrobiia	IMCC26256	IMCC26256_fa	IMCC26256_ge
Otu000154	Bacteria	Actinobacteriota	Thermoleophilia	Solirubrobacterales	Solirubrobacteraceae	Solirubrobacter
Otu000155	Bacteria	Actinobacteriota	Actinobacteria	Kineosporiales	Kineosporiaceae	Kineosporiaceae_unclassified
Otu000156	Bacteria	Chloroflexi	TK10	TK10_or	TK10_fa	TK10_ge
Otu000157	Bacteria	Actinobacteriota	Thermoleophilia	Gaiellales	uncultured	uncultured_ge
Otu000158	Bacteria	Actinobacteriota	Actinobacteria	Micromonosporales	Micromonosporaceae	Dactylosporangium
Otu000159	Bacteria	Chloroflexi	KD4-96	KD4-96_or	KD4-96_fa	KD4-96_ge
Otu000160	Bacteria	Actinobacteriota	Actinobacteria	Frankiales	Nakamurellaceae	Nakamurella
Otu000161	Bacteria	Proteobacteria	Alphaproteobacteria	Acetobacterales	Acetobacteraceae	Acetobacteraceae_unclassified
Otu000162	Bacteria	Actinobacteriota	Actinobacteria	Pseudonocardiales	Pseudonocardiaceae	Amycolatopsis
Otu000163	Bacteria	Actinobacteriota	Acidimicrobiia	IMCC26256	IMCC26256_fa	IMCC26256_ge
Otu000164	Bacteria	Actinobacteriota	Thermoleophilia	Solirubrobacterales	67-14	67-14_ge
Otu000165	Bacteria	Proteobacteria	Gammaproteobacteria	Enterobacterales	Enterobacteriaceae	Enterobacteriaceae_unclassified
Otu000166	Bacteria	Chloroflexi	AD3	AD3_or	AD3_fa	AD3_ge
Otu000167	Bacteria	Actinobacteriota	Actinobacteria	Pseudonocardiales	Pseudonocardiaceae	Crossiella
Otu000168	Bacteria	Gemmatimonadota	Gemmatimonadetes	Gemmatimonadales	Gemmatimonadaceae	Gemmatimonas
Otu000169	Bacteria	Actinobacteriota	MB-A2-108	MB-A2-108_or	MB-A2-108_fa	MB-A2-108_ge
Otu000170	Bacteria	Actinobacteriota	Acidimicrobiia	Microtrichales	Iamiaceae	Iamia
Otu000171	Bacteria	Proteobacteria	Gammaproteobacteria	Xanthomonadales	Rhodanobacteraceae	Dokdonella
Otu000172	Bacteria	Chloroflexi	KD4-96	KD4-96_or	KD4-96_fa	KD4-96_ge
Otu000173	Bacteria	Actinobacteriota	Actinobacteria	Frankiales	Frankiaceae	Jatrophihabitans
Otu000174	Bacteria	Proteobacteria	Alphaproteobacteria	Rhizobiales	Rhizobiaceae	Allorhizobium-Neorhizobium-Pararhizobium-Rhizobium
Otu000175	Bacteria	Acidobacteriota	Acidobacteriae	Bryobacterales	Bryobacteraceae	Bryobacter
Otu000176	Bacteria	Actinobacteriota	Acidimicrobiia	IMCC26256	IMCC26256_fa	IMCC26256_ge
Otu000177	Bacteria	Actinobacteriota	Actinobacteria	Frankiales	Frankiaceae	Jatrophihabitans
Otu000178	Bacteria	Chloroflexi	Gitt-GS-136	Gitt-GS-136_or	Gitt-GS-136_fa	Gitt-GS-136_ge
Otu000179	Bacteria	Actinobacteriota	Actinobacteria	Pseudonocardiales	Pseudonocardiaceae	Pseudonocardia
Otu000180	Bacteria	Actinobacteriota	Actinobacteria	Propionibacteriales	Nocardioidaceae	Nocardioides
Otu000181	Bacteria	Gemmatimonadota	Gemmatimonadetes	Gemmatimonadales	Gemmatimonadaceae	uncultured
Otu000182	Bacteria	Chloroflexi	Ktedonobacteria	C0119	C0119_fa	C0119_ge
Otu000183	Bacteria	Actinobacteriota	Actinobacteria	Frankiales	uncultured	uncultured_ge
Otu000184	Bacteria	Actinobacteriota	Thermoleophilia	Solirubrobacterales	67-14	67-14_ge
Otu000185	Bacteria	Actinobacteriota	Actinobacteria	Micromonosporales	Micromonosporaceae	Micromonosporaceae_unclassified
Otu000186	Bacteria	Proteobacteria	Alphaproteobacteria	Reyranellales	Reyranellaceae	Reyranella
Otu000187	Bacteria	Actinobacteriota	Thermoleophilia	Gaiellales	uncultured	uncultured_ge
Otu000188	Bacteria	Acidobacteriota	Acidobacteriae	Solibacterales	Solibacteraceae	Candidatus_Solibacter
Otu000189	Bacteria	Actinobacteriota	Actinobacteria	Corynebacteriales	Nocardiaceae	Rhodococcus
Otu000190	Bacteria	Actinobacteriota	Thermoleophilia	Gaiellales	Gaiellaceae	Gaiella
Otu000191	Bacteria	Acidobacteriota	Vicinamibacteria	Vicinamibacterales	uncultured	uncultured_ge
Otu000192	Bacteria	Acidobacteriota	Acidobacteriae	Acidobacteriales	uncultured	uncultured_ge
Otu000193	Bacteria	Proteobacteria	Alphaproteobacteria	Rhizobiales	Methyloligellaceae	Methyloligellaceae_unclassified
Otu000194	Bacteria	Chloroflexi	Chloroflexia	Chloroflexales	Roseiflexaceae	uncultured
Otu000195	Bacteria	Actinobacteriota	Acidimicrobiia	IMCC26256	IMCC26256_fa	IMCC26256_ge
Otu000196	Bacteria	Proteobacteria	Gammaproteobacteria	Enterobacterales	Enterobacteriaceae	Enterobacter
Otu000197	Bacteria	Actinobacteriota	Actinobacteria	Propionibacteriales	Nocardioidaceae	Kribbella
Otu000198	Bacteria	Chloroflexi	Chloroflexia	Thermomicrobiales	JG30-KF-CM45	JG30-KF-CM45_ge
Otu000199	Bacteria	Actinobacteriota	Actinobacteria	Propionibacteriales	Nocardioidaceae	Nocardioides
Otu000200	Bacteria	Actinobacteriota	Actinobacteria	Micromonosporales	Micromonosporaceae	Actinoplanes
Otu000201	Bacteria	Acidobacteriota	Vicinamibacteria	Vicinamibacterales	uncultured	uncultured_ge
Otu000202	Bacteria	Actinobacteriota	Actinobacteria	Propionibacteriales	Nocardioidaceae	Nocardioides
Otu000203	Bacteria	Actinobacteriota	Thermoleophilia	Solirubrobacterales	Solirubrobacteraceae	Solirubrobacter
Otu000204	Bacteria	Actinobacteriota	Thermoleophilia	Solirubrobacterales	Solirubrobacteraceae	Conexibacter
Otu000205	Bacteria	Actinobacteriota	Actinobacteria	Frankiales	Sporichthyaceae	uncultured
Otu000206	Bacteria	Actinobacteriota	Actinobacteria	Corynebacteriales	Mycobacteriaceae	Mycobacterium
Otu000207	Bacteria	Acidobacteriota	Acidobacteriae	Solibacterales	Solibacteraceae	Candidatus_Solibacter
Otu000208	Bacteria	Proteobacteria	Alphaproteobacteria	Sphingomonadales	Sphingomonadaceae	Sphingomonas
Otu000209	Bacteria	Actinobacteriota	Acidimicrobiia	Microtrichales	Ilumatobacteraceae	CL500-29_marine_group
Otu000210	Bacteria	Acidobacteriota	Acidobacteriae	Bryobacterales	Bryobacteraceae	Bryobacter
Otu000211	Bacteria	Actinobacteriota	Thermoleophilia	Gaiellales	Gaiellales_unclassified	Gaiellales_unclassified
Otu000212	Bacteria	Actinobacteriota	Actinobacteria	Micromonosporales	Micromonosporaceae	Luedemannella
Otu000213	Bacteria	Acidobacteriota	Vicinamibacteria	Vicinamibacterales	uncultured	uncultured_ge
Otu000214	Bacteria	Proteobacteria	Alphaproteobacteria	Rhizobiales	Beijerinckiaceae	Bosea
Otu000215	Bacteria	Proteobacteria	Alphaproteobacteria	Rhizobiales	Rhizobiales_Incertae_Sedis	Nordella
Otu000216	Bacteria	Chloroflexi	TK10	TK10_or	TK10_fa	TK10_ge
Otu000217	Bacteria	Proteobacteria	Gammaproteobacteria	Burkholderiales	SC-I-84	SC-I-84_ge
Otu000218	Bacteria	Proteobacteria	Gammaproteobacteria	CCD24	CCD24_fa	CCD24_ge
Otu000219	Bacteria	Actinobacteriota	Thermoleophilia	Solirubrobacterales	Solirubrobacteraceae	Conexibacter
Otu000220	Bacteria	Actinobacteriota	Actinobacteria	Corynebacteriales	Mycobacteriaceae	Mycobacterium
Otu000221	Bacteria	Firmicutes	Bacilli	Paenibacillales	Paenibacillaceae	Paenibacillus
Otu000222	Bacteria	Firmicutes	Bacilli	Alicyclobacillales	Alicyclobacillaceae	Tumebacillus
Otu000223	Bacteria	Proteobacteria	Gammaproteobacteria	Xanthomonadales	Rhodanobacteraceae	Rhodanobacteraceae_unclassified
Otu000224	Bacteria	Chloroflexi	Gitt-GS-136	Gitt-GS-136_or	Gitt-GS-136_fa	Gitt-GS-136_ge
Otu000225	Bacteria	Methylomirabilota	Methylomirabilia	Rokubacteriales	Rokubacteriales_fa	Rokubacteriales_ge
Otu000226	Bacteria	Proteobacteria	Gammaproteobacteria	Burkholderiales	SC-I-84	SC-I-84_ge
Otu000227	Bacteria	Proteobacteria	Alphaproteobacteria	Rhizobiales	Rhizobiaceae	Allorhizobium-Neorhizobium-Pararhizobium-Rhizobium
Otu000228	Bacteria	Proteobacteria	Gammaproteobacteria	Xanthomonadales	Xanthomonadaceae	Arenimonas
Otu000229	Bacteria	Actinobacteriota	Actinobacteria	Micromonosporales	Micromonosporaceae	Actinoplanes
Otu000230	Bacteria	Proteobacteria	Alphaproteobacteria	Sphingomonadales	Sphingomonadaceae	Altererythrobacter
Otu000231	Bacteria	Firmicutes	Bacilli	Alicyclobacillales	Alicyclobacillaceae	Tumebacillus
Otu000232	Bacteria	Firmicutes	Bacilli	Bacillales	Bacillaceae	Bacillus
Otu000233	Bacteria	Proteobacteria	Gammaproteobacteria	Burkholderiales	Comamonadaceae	Ramlibacter
Otu000234	Bacteria	Verrucomicrobiota	Verrucomicrobiae	Chthoniobacterales	Chthoniobacteraceae	Candidatus_Udaeobacter
Otu000235	Bacteria	Acidobacteriota	Vicinamibacteria	Vicinamibacterales	Vicinamibacteraceae	Vicinamibacteraceae_ge
Otu000236	Bacteria	Proteobacteria	Alphaproteobacteria	Acetobacterales	Acetobacteraceae	Acetobacteraceae_unclassified
Otu000237	Bacteria	Actinobacteriota	Actinobacteria	Corynebacteriales	Mycobacteriaceae	Mycobacterium
Otu000238	Bacteria	Chloroflexi	Ktedonobacteria	Ktedonobacterales	Ktedonobacteraceae	1921-3
Otu000239	Bacteria	Chloroflexi	Chloroflexia	Chloroflexales	Roseiflexaceae	Roseiflexaceae_unclassified
Otu000240	Bacteria	RCP2-54	RCP2-54_cl	RCP2-54_or	RCP2-54_fa	RCP2-54_ge
Otu000241	Bacteria	Actinobacteriota	Actinobacteria	Streptosporangiales	Streptosporangiaceae	Nonomuraea
Otu000242	Bacteria	Acidobacteriota	Acidobacteriae	Acidobacteriales	uncultured	uncultured_ge
Otu000243	Bacteria	Proteobacteria	Gammaproteobacteria	Steroidobacterales	Steroidobacteraceae	Steroidobacter
Otu000244	Bacteria	Proteobacteria	Alphaproteobacteria	Azospirillales	uncultured	uncultured_ge
Otu000245	Bacteria	Actinobacteriota	Actinobacteria	Micromonosporales	Micromonosporaceae	Micromonospora
Otu000246	Bacteria	Chloroflexi	KD4-96	KD4-96_or	KD4-96_fa	KD4-96_ge
Otu000247	Bacteria	Actinobacteriota	Actinobacteria	Frankiales	Geodermatophilaceae	Geodermatophilaceae_unclassified
Otu000249	Bacteria	Actinobacteriota	Thermoleophilia	Solirubrobacterales	Solirubrobacterales_unclassified	Solirubrobacterales_unclassified
Otu000250	Bacteria	Actinobacteriota	Actinobacteria	Kineosporiales	Kineosporiaceae	Angustibacter
Otu000251	Bacteria	Actinobacteriota	Thermoleophilia	Solirubrobacterales	67-14	67-14_ge
Otu000252	Bacteria	Chloroflexi	Ktedonobacteria	Ktedonobacterales	Ktedonobacteraceae	1921-3
Otu000253	Bacteria	Proteobacteria	Gammaproteobacteria	Burkholderiales	Nitrosomonadaceae	Nitrosospira
Otu000254	Bacteria	Actinobacteriota	Thermoleophilia	Solirubrobacterales	67-14	67-14_ge
Otu000255	Bacteria	Actinobacteriota	Thermoleophilia	Gaiellales	Gaiellaceae	Gaiella
Otu000256	Bacteria	Actinobacteriota	Actinobacteria	Pseudonocardiales	Pseudonocardiaceae	Pseudonocardia
Otu000257	Bacteria	Proteobacteria	Gammaproteobacteria	Burkholderiales	Comamonadaceae	Variovorax
Otu000258	Bacteria	Bacteroidota	Bacteroidia	Flavobacteriales	Flavobacteriaceae	Flavobacterium
Otu000259	Bacteria	Actinobacteriota	Actinobacteria	Propionibacteriales	Nocardioidaceae	Nocardioides
Otu000260	Bacteria	Actinobacteriota	Acidimicrobiia	Microtrichales	Ilumatobacteraceae	Ilumatobacter
Otu000261	Bacteria	Firmicutes	Bacilli	Bacillales	Bacillaceae	Bacillus
Otu000262	Bacteria	Chloroflexi	Chloroflexia	Thermomicrobiales	JG30-KF-CM45	JG30-KF-CM45_ge
Otu000263	Bacteria	Actinobacteriota	Actinobacteria	Micrococcales	Microbacteriaceae	Agromyces
Otu000264	Bacteria	Actinobacteriota	Actinobacteria	Kineosporiales	Kineosporiaceae	Kineosporia
Otu000265	Bacteria	Actinobacteriota	Thermoleophilia	Solirubrobacterales	67-14	67-14_ge
Otu000266	Bacteria	Actinobacteriota	Actinobacteria	Frankiales	Acidothermaceae	Acidothermus
Otu000267	Bacteria	Acidobacteriota	Vicinamibacteria	Vicinamibacterales	Vicinamibacteraceae	uncultured
Otu000268	Bacteria	Chloroflexi	Dehalococcoidia	S085	S085_fa	S085_ge
Otu000269	Bacteria	Proteobacteria	Gammaproteobacteria	Burkholderiales	SC-I-84	SC-I-84_ge
Otu000270	Bacteria	Proteobacteria	Gammaproteobacteria	Xanthomonadales	Rhodanobacteraceae	Rhodanobacter
Otu000271	Bacteria	Acidobacteriota	Acidobacteriae	Acidobacteriales	Acidobacteriaceae_	Acidipila-Silvibacterium
Otu000272	Bacteria	Proteobacteria	Alphaproteobacteria	Sphingomonadales	Sphingomonadaceae	Sphingomonadaceae_unclassified
Otu000273	Bacteria	Gemmatimonadota	Gemmatimonadetes	Gemmatimonadales	Gemmatimonadaceae	uncultured
Otu000274	Bacteria	Proteobacteria	Gammaproteobacteria	Gammaproteobacteria_Incertae_Sedis	Unknown_Family	Acidibacter
Otu000275	Bacteria	Proteobacteria	Alphaproteobacteria	Rhizobiales	Rhizobiaceae	Rhizobiaceae_unclassified
Otu000276	Bacteria	Actinobacteriota	Actinobacteria	Propionibacteriales	Nocardioidaceae	Nocardioides
Otu000277	Bacteria	Acidobacteriota	Blastocatellia	Pyrinomonadales	Pyrinomonadaceae	RB41
Otu000278	Bacteria	Firmicutes	Bacilli	Paenibacillales	Paenibacillaceae	Paenibacillus
Otu000279	Bacteria	Chloroflexi	Ktedonobacteria	Ktedonobacterales	JG30-KF-AS9	JG30-KF-AS9_ge
Otu000280	Bacteria	Actinobacteriota	Thermoleophilia	Gaiellales	uncultured	uncultured_ge
Otu000281	Bacteria	Proteobacteria	Gammaproteobacteria	Burkholderiales	Comamonadaceae	Ramlibacter
Otu000282	Bacteria	Actinobacteriota	Acidimicrobiia	Microtrichales	uncultured	uncultured_ge
Otu000283	Bacteria	Firmicutes	Bacilli	Alicyclobacillales	Alicyclobacillaceae	Tumebacillus
Otu000284	Bacteria	Actinobacteriota	Acidimicrobiia	Microtrichales	Ilumatobacteraceae	Ilumatobacteraceae_unclassified
Otu000285	Bacteria	Actinobacteriota	Actinobacteria	Actinobacteria_unclassified	Actinobacteria_unclassified	Actinobacteria_unclassified
Otu000286	Bacteria	Proteobacteria	Alphaproteobacteria	Sphingomonadales	Sphingomonadaceae	Sphingomonas
Otu000287	Bacteria	Proteobacteria	Alphaproteobacteria	Dongiales	Dongiaceae	Dongia
Otu000288	Bacteria	Actinobacteriota	Actinobacteria	Micromonosporales	Micromonosporaceae	Dactylosporangium
Otu000289	Bacteria	Actinobacteriota	Thermoleophilia	Gaiellales	uncultured	uncultured_ge
Otu000290	Bacteria	Acidobacteriota	Vicinamibacteria	Vicinamibacterales	Vicinamibacteraceae	Vicinamibacteraceae_ge
Otu000291	Bacteria	Actinobacteriota	Thermoleophilia	Gaiellales	Gaiellales_unclassified	Gaiellales_unclassified
Otu000292	Bacteria	Proteobacteria	Gammaproteobacteria	Pseudomonadales	Pseudomonadaceae	Pseudomonas
Otu000293	Bacteria	Actinobacteriota	Actinobacteria	Streptosporangiales	Streptosporangiaceae	Streptosporangium
Otu000294	Bacteria	Proteobacteria	Alphaproteobacteria	Rhizobiales	Beijerinckiaceae	Roseiarcus
Otu000295	Bacteria	Actinobacteriota	Actinobacteria	Corynebacteriales	Nocardiaceae	Nocardia
Otu000296	Bacteria	Proteobacteria	Gammaproteobacteria	Burkholderiales	Comamonadaceae	Comamonadaceae_unclassified
Otu000297	Bacteria	Actinobacteriota	Actinobacteria	Pseudonocardiales	Pseudonocardiaceae	Actinomycetospora
Otu000298	Bacteria	Proteobacteria	Alphaproteobacteria	Sphingomonadales	Sphingomonadaceae	Sphingomonadaceae_unclassified
Otu000299	Bacteria	Bacteroidota	Bacteroidia	Chitinophagales	Chitinophagaceae	Chitinophaga
Otu000300	Bacteria	Actinobacteriota	Acidimicrobiia	Microtrichales	Ilumatobacteraceae	Ilumatobacter
Otu000301	Bacteria	Actinobacteriota	Acidimicrobiia	Acidimicrobiales	Acidimicrobiaceae	uncultured
Otu000302	Bacteria	Chloroflexi	KD4-96	KD4-96_or	KD4-96_fa	KD4-96_ge
Otu000303	Bacteria	Chloroflexi	Chloroflexia	Chloroflexales	Roseiflexaceae	uncultured
Otu000304	Bacteria	Actinobacteriota	Actinobacteria	Propionibacteriales	Nocardioidaceae	Nocardioides
Otu000305	Bacteria	Actinobacteriota	Actinobacteria	Micrococcales	Microbacteriaceae	Microbacteriaceae_unclassified
Otu000306	Bacteria	Proteobacteria	Alphaproteobacteria	Dongiales	Dongiaceae	Dongia
Otu000307	Bacteria	WPS-2	WPS-2_cl	WPS-2_or	WPS-2_fa	WPS-2_ge
Otu000308	Bacteria	Actinobacteriota	Actinobacteria	Streptosporangiales	Thermomonosporaceae	Actinomadura
Otu000309	Bacteria	Actinobacteriota	Actinobacteria	Micrococcales	Intrasporangiaceae	Oryzihumus
Otu000310	Bacteria	Actinobacteriota	Thermoleophilia	Gaiellales	uncultured	uncultured_ge
Otu000311	Bacteria	Proteobacteria	Gammaproteobacteria	Gammaproteobacteria_Incertae_Sedis	Unknown_Family	Acidibacter
Otu000312	Bacteria	Chloroflexi	Ktedonobacteria	Ktedonobacterales	JG30-KF-AS9	JG30-KF-AS9_ge
Otu000313	Bacteria	Actinobacteriota	Thermoleophilia	Gaiellales	Gaiellales_unclassified	Gaiellales_unclassified
Otu000314	Bacteria	Actinobacteriota	Acidimicrobiia	IMCC26256	IMCC26256_fa	IMCC26256_ge
Otu000315	Bacteria	Actinobacteriota	Actinobacteria	Propionibacteriales	Nocardioidaceae	Nocardioides
Otu000316	Bacteria	Actinobacteriota	Thermoleophilia	uncultured	uncultured_fa	uncultured_ge
Otu000317	Bacteria	Chloroflexi	Gitt-GS-136	Gitt-GS-136_or	Gitt-GS-136_fa	Gitt-GS-136_ge
Otu000318	Bacteria	Actinobacteriota	Actinobacteria	Micrococcales	Micrococcaceae	Sinomonas
Otu000319	Bacteria	Actinobacteriota	Actinobacteria	Pseudonocardiales	Pseudonocardiaceae	Pseudonocardiaceae_unclassified
Otu000320	Bacteria	Proteobacteria	Gammaproteobacteria	Gammaproteobacteria_Incertae_Sedis	Unknown_Family	Acidibacter
Otu000321	Bacteria	Actinobacteriota	Actinobacteria	Micromonosporales	Micromonosporaceae	Micromonospora
Otu000322	Bacteria	Actinobacteriota	Actinobacteria	Corynebacteriales	Nocardiaceae	Smaragdicoccus
Otu000323	Bacteria	Chloroflexi	Ktedonobacteria	Ktedonobacterales	Ktedonobacteraceae	uncultured
Otu000324	Bacteria	Gemmatimonadota	Gemmatimonadetes	Gemmatimonadales	Gemmatimonadaceae	Gemmatimonas
Otu000325	Bacteria	Acidobacteriota	Acidobacteriae	Solibacterales	Solibacteraceae	Candidatus_Solibacter
Otu000326	Bacteria	Acidobacteriota	Holophagae	Subgroup_7	Subgroup_7_fa	Subgroup_7_ge
Otu000327	Bacteria	Proteobacteria	Alphaproteobacteria	Rhizobiales	Labraceae	Labrys
Otu000328	Bacteria	Actinobacteriota	Actinobacteria	Frankiales	Acidothermaceae	Acidothermus
Otu000329	Bacteria	Proteobacteria	Alphaproteobacteria	Tistrellales	Geminicoccaceae	Candidatus_Alysiosphaera
Otu000330	Bacteria	Actinobacteriota	Thermoleophilia	Solirubrobacterales	Solirubrobacterales_unclassified	Solirubrobacterales_unclassified
Otu000331	Bacteria	Proteobacteria	Gammaproteobacteria	Burkholderiales	Burkholderiaceae	Burkholderia-Caballeronia-Paraburkholderia
Otu000332	Bacteria	Proteobacteria	Alphaproteobacteria	Rhizobiales	Rhizobiaceae	Rhizobiaceae_unclassified
Otu000333	Bacteria	Proteobacteria	Gammaproteobacteria	PLTA13	PLTA13_fa	PLTA13_ge
Otu000334	Bacteria	Acidobacteriota	Blastocatellia	Pyrinomonadales	Pyrinomonadaceae	RB41
Otu000335	Bacteria	Chloroflexi	JG30-KF-CM66	JG30-KF-CM66_or	JG30-KF-CM66_fa	JG30-KF-CM66_ge
Otu000336	Bacteria	Firmicutes	Bacilli	Bacillales	Bacillaceae	Bacillaceae_unclassified
Otu000337	Bacteria	Firmicutes	Bacilli	Paenibacillales	Paenibacillaceae	Cohnella
Otu000338	Bacteria	Proteobacteria	Alphaproteobacteria	Acetobacterales	Acetobacteraceae	uncultured
Otu000339	Bacteria	Proteobacteria	Alphaproteobacteria	Rhizobiales	Beijerinckiaceae	Microvirga
Otu000340	Bacteria	Actinobacteriota	Actinobacteria	Pseudonocardiales	Pseudonocardiaceae	Pseudonocardia
Otu000341	Bacteria	Proteobacteria	Alphaproteobacteria	Elsterales	uncultured	uncultured_ge
Otu000342	Bacteria	Myxococcota	Polyangia	Polyangiales	Polyangiaceae	Aetherobacter
Otu000343	Bacteria	Actinobacteriota	Actinobacteriota_unclassified	Actinobacteriota_unclassified	Actinobacteriota_unclassified	Actinobacteriota_unclassified
Otu000344	Bacteria	Proteobacteria	Alphaproteobacteria	Elsterales	uncultured	uncultured_ge
Otu000345	Bacteria	Actinobacteriota	Actinobacteria	Micrococcales	Promicromonosporaceae	Cellulosimicrobium
Otu000346	Bacteria	Actinobacteriota	Actinobacteria	Micromonosporales	Micromonosporaceae	Luedemannella
Otu000347	Bacteria	Actinobacteriota	Actinobacteria	Propionibacteriales	Nocardioidaceae	Nocardioides
Otu000348	Bacteria	Acidobacteriota	Acidobacteriae	Acidobacteriales	Acidobacteriales_unclassified	Acidobacteriales_unclassified
Otu000349	Bacteria	Proteobacteria	Alphaproteobacteria	Rhizobiales	Beijerinckiaceae	alphaI_cluster
Otu000350	Bacteria	Proteobacteria	Gammaproteobacteria	Gammaproteobacteria_Incertae_Sedis	Unknown_Family	Acidibacter
Otu000351	Bacteria	Nitrospirota	Nitrospiria	Nitrospirales	Nitrospiraceae	Nitrospira
Otu000352	Bacteria	Acidobacteriota	Vicinamibacteria	Vicinamibacterales	uncultured	uncultured_ge
Otu000353	Bacteria	Proteobacteria	Alphaproteobacteria	Acetobacterales	Acetobacteraceae	Acetobacteraceae_unclassified
Otu000354	Bacteria	Proteobacteria	Gammaproteobacteria	Burkholderiales	Nitrosomonadaceae	MND1
Otu000355	Bacteria	Proteobacteria	Alphaproteobacteria	Rhizobiales	KF-JG30-B3	KF-JG30-B3_ge
Otu000356	Bacteria	Myxococcota	Polyangia	Polyangiales	Polyangiaceae	Pajaroellobacter
Otu000357	Bacteria	Actinobacteriota	Actinobacteria	Frankiales	Geodermatophilaceae	Geodermatophilus
Otu000358	Bacteria	Actinobacteriota	Actinobacteria	Micrococcales	Intrasporangiaceae	Intrasporangium
Otu000359	Bacteria	Methylomirabilota	Methylomirabilia	Rokubacteriales	WX65	WX65_ge
Otu000360	Bacteria	Myxococcota	Polyangia	Haliangiales	Haliangiaceae	Haliangium
Otu000361	Bacteria	Proteobacteria	Alphaproteobacteria	Tistrellales	Geminicoccaceae	Candidatus_Alysiosphaera
Otu000362	Bacteria	Proteobacteria	Alphaproteobacteria	Rhizobiales	Rhizobiaceae	Rhizobiaceae_unclassified
Otu000363	Bacteria	Acidobacteriota	Vicinamibacteria	Vicinamibacterales	uncultured	uncultured_ge
Otu000364	Bacteria	Chloroflexi	Chloroflexia	Chloroflexales	Roseiflexaceae	uncultured
Otu000365	Bacteria	Actinobacteriota	Actinobacteria	Frankiales	Acidothermaceae	Acidothermus
Otu000366	Bacteria	Actinobacteriota	Actinobacteria	Propionibacteriales	Nocardioidaceae	Nocardioides
Otu000367	Bacteria	Acidobacteriota	Vicinamibacteria	Subgroup_17	Subgroup_17_fa	Subgroup_17_ge
Otu000368	Bacteria	Actinobacteriota	Acidimicrobiia	IMCC26256	IMCC26256_fa	IMCC26256_ge
Otu000369	Bacteria	Actinobacteriota	Actinobacteria	Micrococcales	Microbacteriaceae	Microbacteriaceae_unclassified
Otu000370	Bacteria	Actinobacteriota	Thermoleophilia	Gaiellales	Gaiellaceae	Gaiella
Otu000371	Bacteria	Proteobacteria	Alphaproteobacteria	Rhizobiales	Rhizobiaceae	Shinella
Otu000372	Bacteria	Proteobacteria	Alphaproteobacteria	Acetobacterales	Acetobacteraceae	uncultured
Otu000373	Bacteria	Acidobacteriota	Vicinamibacteria	Vicinamibacterales	Vicinamibacteraceae	Vicinamibacteraceae_ge
Otu000374	Bacteria	Acidobacteriota	Vicinamibacteria	Vicinamibacterales	Vicinamibacteraceae	Vicinamibacteraceae_ge
Otu000375	Bacteria	Chloroflexi	Ktedonobacteria	C0119	C0119_fa	C0119_ge
Otu000376	Bacteria	Acidobacteriota	Subgroup_5	Subgroup_5_or	Subgroup_5_fa	Subgroup_5_ge
Otu000377	Bacteria	Acidobacteriota	Vicinamibacteria	Vicinamibacterales	Vicinamibacteraceae	Vicinamibacteraceae_ge
Otu000378	Bacteria	Chloroflexi	Chloroflexia	Thermomicrobiales	JG30-KF-CM45	JG30-KF-CM45_ge
Otu000379	Bacteria	Chloroflexi	KD4-96	KD4-96_or	KD4-96_fa	KD4-96_ge
Otu000380	Bacteria	Actinobacteriota	Thermoleophilia	Gaiellales	Gaiellaceae	Gaiella
Otu000381	Bacteria	Gemmatimonadota	Gemmatimonadetes	Gemmatimonadales	Gemmatimonadaceae	Gemmatimonas
Otu000382	Bacteria	Actinobacteriota	Actinobacteria	Micrococcales	Intrasporangiaceae	Lapillicoccus
Otu000383	Bacteria	Proteobacteria	Gammaproteobacteria	Burkholderiales	Nitrosomonadaceae	Ellin6067
Otu000384	Bacteria	Proteobacteria	Gammaproteobacteria	Burkholderiales	Burkholderiaceae	Burkholderia-Caballeronia-Paraburkholderia
Otu000385	Bacteria	Firmicutes	Bacilli	Paenibacillales	Paenibacillaceae	Paenibacillus
Otu000386	Bacteria	Proteobacteria	Gammaproteobacteria	Burkholderiales	Nitrosomonadaceae	IS-44
Otu000387	Bacteria	Actinobacteriota	Thermoleophilia	Gaiellales	uncultured	uncultured_ge
Otu000388	Bacteria	Proteobacteria	Alphaproteobacteria	Rhizobiales	Beijerinckiaceae	Microvirga
Otu000389	Bacteria	Actinobacteriota	Thermoleophilia	Gaiellales	uncultured	uncultured_ge
Otu000390	Bacteria	Proteobacteria	Gammaproteobacteria	Xanthomonadales	Xanthomonadaceae	Lysobacter
Otu000391	Bacteria	Actinobacteriota	Actinobacteria	Propionibacteriales	Nocardioidaceae	Nocardioides
Otu000392	Bacteria	Proteobacteria	Alphaproteobacteria	uncultured	uncultured_fa	uncultured_ge
Otu000393	Bacteria	Actinobacteriota	Thermoleophilia	Gaiellales	uncultured	uncultured_ge
Otu000394	Bacteria	Actinobacteriota	Actinobacteria	Corynebacteriales	Nocardiaceae	Gordonia
Otu000395	Bacteria	Firmicutes	Bacilli	Paenibacillales	Paenibacillaceae	Ammoniphilus
Otu000396	Bacteria	Chloroflexi	Ktedonobacteria	Ktedonobacterales	Ktedonobacteraceae	uncultured
Otu000397	Bacteria	Chloroflexi	Ktedonobacteria	Ktedonobacterales	JG30-KF-AS9	JG30-KF-AS9_ge
Otu000398	Bacteria	Proteobacteria	Alphaproteobacteria	Acetobacterales	Acetobacteraceae	Acidiphilium
Otu000399	Bacteria	Actinobacteriota	Actinobacteria	Corynebacteriales	Nocardiaceae	Rhodococcus
Otu000400	Bacteria	Actinobacteriota	Actinobacteria	Propionibacteriales	Nocardioidaceae	Nocardioides
Otu000401	Bacteria	Actinobacteriota	Actinobacteria	Propionibacteriales	Nocardioidaceae	Nocardioides
Otu000402	Bacteria	Proteobacteria	Gammaproteobacteria	Burkholderiales	TRA3-20	TRA3-20_ge
Otu000403	Bacteria	Actinobacteriota	Actinobacteria	Micrococcales	Micrococcaceae	Arthrobacter
Otu000404	Bacteria	Patescibacteria	Saccharimonadia	Saccharimonadales	Saccharimonadales_unclassified	Saccharimonadales_unclassified
Otu000405	Bacteria	Proteobacteria	Alphaproteobacteria	uncultured	uncultured_fa	uncultured_ge
Otu000406	Bacteria	Acidobacteriota	Vicinamibacteria	Vicinamibacterales	uncultured	uncultured_ge
Otu000407	Bacteria	Chloroflexi	Chloroflexia	Thermomicrobiales	JG30-KF-CM45	JG30-KF-CM45_ge
Otu000408	Bacteria	Chloroflexi	Chloroflexia	Thermomicrobiales	JG30-KF-CM45	JG30-KF-CM45_ge
Otu000409	Bacteria	Firmicutes	Bacilli	Paenibacillales	Paenibacillaceae	Paenibacillus
Otu000410	Bacteria	Proteobacteria	Alphaproteobacteria	Sphingomonadales	Sphingomonadaceae	Sphingobium
Otu000411	Bacteria	Actinobacteriota	Actinobacteria	Micromonosporales	Micromonosporaceae	Catellatospora
Otu000412	Bacteria	Actinobacteriota	Actinobacteria	Propionibacteriales	Nocardioidaceae	Nocardioidaceae_unclassified
Otu000413	Bacteria	Actinobacteriota	Acidimicrobiia	Microtrichales	Microtrichales_unclassified	Microtrichales_unclassified
Otu000414	Bacteria	Proteobacteria	Gammaproteobacteria	Burkholderiales	Burkholderiaceae	Burkholderia-Caballeronia-Paraburkholderia
Otu000415	Bacteria	Proteobacteria	Alphaproteobacteria	Rhizobiales	Devosiaceae	Devosiaceae_unclassified
Otu000416	Bacteria	Actinobacteriota	Thermoleophilia	Solirubrobacterales	Solirubrobacteraceae	Solirubrobacteraceae_unclassified
Otu000417	Bacteria	Actinobacteriota	Thermoleophilia	Gaiellales	uncultured	uncultured_ge
Otu000418	Bacteria	Acidobacteriota	Acidobacteriae	Bryobacterales	Bryobacteraceae	Bryobacter
Otu000419	Bacteria	Actinobacteriota	Actinobacteria	Micrococcales	Micrococcaceae	Micrococcaceae_unclassified
Otu000420	Bacteria	Proteobacteria	Alphaproteobacteria	Rhizobiales	Beijerinckiaceae	Microvirga
Otu000421	Bacteria	Proteobacteria	Alphaproteobacteria	Rhizobiales	Xanthobacteraceae	uncultured
Otu000422	Bacteria	Actinobacteriota	Actinobacteria	Propionibacteriales	Nocardioidaceae	Nocardioidaceae_unclassified
Otu000423	Bacteria	Proteobacteria	Gammaproteobacteria	Xanthomonadales	Xanthomonadaceae	Stenotrophomonas
Otu000424	Bacteria	Myxococcota	Myxococcia	Myxococcales	Myxococcaceae	Archangium
Otu000425	Bacteria	Actinobacteriota	Actinobacteria	Pseudonocardiales	Pseudonocardiaceae	Pseudonocardia
Otu000426	Bacteria	Proteobacteria	Alphaproteobacteria	Rhizobiales	Rhodomicrobiaceae	Rhodomicrobium
Otu000427	Bacteria	Actinobacteriota	Actinobacteria	Frankiales	Frankiaceae	Jatrophihabitans
Otu000428	Bacteria	Actinobacteriota	MB-A2-108	MB-A2-108_or	MB-A2-108_fa	MB-A2-108_ge
Otu000429	Bacteria	Proteobacteria	Gammaproteobacteria	Burkholderiales	Comamonadaceae	Comamonadaceae_unclassified
Otu000430	Bacteria	Actinobacteriota	Actinobacteria	Micrococcales	Dermacoccaceae	Flexivirga
Otu000431	Bacteria	Firmicutes	Bacilli	Bacillales	Planococcaceae	Lysinibacillus
Otu000432	Bacteria	Chloroflexi	Chloroflexia	Chloroflexales	Roseiflexaceae	uncultured
Otu000433	Bacteria	Actinobacteriota	Actinobacteria	Kineosporiales	Kineosporiaceae	Kineosporiaceae_unclassified
Otu000434	Bacteria	Actinobacteriota	Actinobacteria	Micromonosporales	Micromonosporaceae	Actinoplanes
Otu000435	Bacteria	Actinobacteriota	Thermoleophilia	Gaiellales	uncultured	uncultured_ge
Otu000436	Bacteria	Acidobacteriota	Vicinamibacteria	Vicinamibacterales	uncultured	uncultured_ge
Otu000437	Bacteria	Actinobacteriota	Acidimicrobiia	Microtrichales	Iamiaceae	Iamia
Otu000438	Bacteria	Proteobacteria	Alphaproteobacteria	Reyranellales	Reyranellaceae	Reyranella
Otu000439	Bacteria	Proteobacteria	Alphaproteobacteria	Caulobacterales	Caulobacteraceae	Caulobacter
Otu000440	Bacteria	Acidobacteriota	Acidobacteriae	Acidobacteriales	uncultured	uncultured_ge
Otu000441	Bacteria	Firmicutes	Bacilli	Alicyclobacillales	Alicyclobacillaceae	Tumebacillus
Otu000442	Bacteria	Actinobacteriota	Acidimicrobiia	Microtrichales	Ilumatobacteraceae	CL500-29_marine_group
Otu000443	Bacteria	Actinobacteriota	Acidimicrobiia	IMCC26256	IMCC26256_fa	IMCC26256_ge
Otu000444	Bacteria	Chloroflexi	Gitt-GS-136	Gitt-GS-136_or	Gitt-GS-136_fa	Gitt-GS-136_ge
Otu000445	Bacteria	Proteobacteria	Alphaproteobacteria	Rhizobiales	Hyphomicrobiaceae	Pedomicrobium
Otu000446	Bacteria	Actinobacteriota	Actinobacteria	Micrococcales	Micrococcaceae	Micrococcaceae_unclassified
Otu000447	Bacteria	Bacteroidota	Bacteroidia	Chitinophagales	Chitinophagaceae	uncultured
Otu000448	Bacteria	Chloroflexi	KD4-96	KD4-96_or	KD4-96_fa	KD4-96_ge
Otu000449	Bacteria	Actinobacteriota	Actinobacteria	Pseudonocardiales	Pseudonocardiaceae	Pseudonocardia
Otu000450	Bacteria	Proteobacteria	Alphaproteobacteria	Elsterales	uncultured	uncultured_ge
Otu000451	Bacteria	Actinobacteriota	Actinobacteria	Frankiales	Geodermatophilaceae	Geodermatophilus
Otu000452	Bacteria	Proteobacteria	Alphaproteobacteria	Rhizobiales	Beijerinckiaceae	Beijerinckiaceae_unclassified
Otu000453	Bacteria	Actinobacteriota	Actinobacteria	Corynebacteriales	Nocardiaceae	Rhodococcus
Otu000454	Bacteria	Actinobacteriota	Actinobacteria	Streptosporangiales	Streptosporangiaceae	Sphaerisporangium
Otu000455	Bacteria	Proteobacteria	Alphaproteobacteria	Rhizobiales	Rhizobiales_unclassified	Rhizobiales_unclassified
Otu000456	Bacteria	Actinobacteriota	Actinobacteria	Corynebacteriales	Mycobacteriaceae	Mycobacterium
Otu000457	Bacteria	Acidobacteriota	Vicinamibacteria	Vicinamibacterales	uncultured	uncultured_ge
Otu000458	Bacteria	Actinobacteriota	Thermoleophilia	Solirubrobacterales	Solirubrobacteraceae	uncultured
Otu000459	Bacteria	Acidobacteriota	Vicinamibacteria	Vicinamibacterales	Vicinamibacteraceae	Vicinamibacteraceae_ge
Otu000460	Bacteria	Proteobacteria	Alphaproteobacteria	Elsterales	uncultured	uncultured_ge
Otu000461	Bacteria	Chloroflexi	Ktedonobacteria	Ktedonobacterales	JG30-KF-AS9	JG30-KF-AS9_ge
Otu000462	Bacteria	Proteobacteria	Alphaproteobacteria	Rhizobiales	Beijerinckiaceae	Methylobacterium-Methylorubrum
Otu000463	Bacteria	Actinobacteriota	Actinobacteria	Micrococcales	Micrococcales_unclassified	Micrococcales_unclassified
Otu000464	Bacteria	Proteobacteria	Gammaproteobacteria	Burkholderiales	Burkholderiaceae	Burkholderia-Caballeronia-Paraburkholderia
Otu000465	Bacteria	Proteobacteria	Alphaproteobacteria	Sphingomonadales	Sphingomonadaceae	Sphingomonadaceae_unclassified
Otu000466	Bacteria	Actinobacteriota	Actinobacteria	Propionibacteriales	Nocardioidaceae	Nocardioides
Otu000467	Bacteria	Acidobacteriota	Vicinamibacteria	Vicinamibacterales	Vicinamibacteraceae	Vicinamibacteraceae_ge
Otu000468	Bacteria	Acidobacteriota	Blastocatellia	Blastocatellales	Blastocatellaceae	Blastocatellaceae_unclassified
Otu000469	Bacteria	Actinobacteriota	Thermoleophilia	Solirubrobacterales	67-14	67-14_ge
Otu000470	Bacteria	Gemmatimonadota	Gemmatimonadetes	Gemmatimonadales	Gemmatimonadaceae	Gemmatimonas
Otu000471	Bacteria	Actinobacteriota	Actinobacteria	Micromonosporales	Micromonosporaceae	Virgisporangium
Otu000472	Bacteria	Firmicutes	Clostridia	Clostridiales	Clostridiaceae	Clostridium_sensu_stricto_1
Otu000473	Bacteria	Actinobacteriota	Actinobacteria	Streptosporangiales	Streptosporangiaceae	Streptosporangiaceae_unclassified
Otu000474	Bacteria	Actinobacteriota	Thermoleophilia	Gaiellales	Gaiellales_unclassified	Gaiellales_unclassified
Otu000475	Bacteria	Proteobacteria	Alphaproteobacteria	Acetobacterales	Acetobacteraceae	Acetobacteraceae_unclassified
Otu000476	Bacteria	Actinobacteriota	Actinobacteria	Frankiales	Acidothermaceae	Acidothermus
Otu000477	Bacteria	Proteobacteria	Gammaproteobacteria	Burkholderiales	Nitrosomonadaceae	MND1
Otu000479	Bacteria	Chloroflexi	TK10	TK10_or	TK10_fa	TK10_ge
Otu000480	Bacteria	Gemmatimonadota	Gemmatimonadetes	Gemmatimonadales	Gemmatimonadaceae	Gemmatimonas
Otu000481	Bacteria	Actinobacteriota	Thermoleophilia	Solirubrobacterales	Solirubrobacteraceae	Conexibacter
Otu000482	Bacteria	Acidobacteriota	Acidobacteriae	Acidobacteriales	Koribacteraceae	Candidatus_Koribacter
Otu000483	Bacteria	Firmicutes	Bacilli	Bacillales	Bacillaceae	Bacillaceae_unclassified
Otu000484	Bacteria	Proteobacteria	Alphaproteobacteria	Acetobacterales	Acetobacteraceae	uncultured
Otu000485	Bacteria	Actinobacteriota	Thermoleophilia	Gaiellales	uncultured	uncultured_ge
Otu000486	Bacteria	Actinobacteriota	MB-A2-108	MB-A2-108_or	MB-A2-108_fa	MB-A2-108_ge
Otu000487	Bacteria	Myxococcota	Polyangia	Haliangiales	Haliangiaceae	Haliangium
Otu000488	Bacteria	Proteobacteria	Gammaproteobacteria	Burkholderiales	Comamonadaceae	Rhizobacter
Otu000489	Bacteria	Chloroflexi	OLB14	OLB14_or	OLB14_fa	OLB14_ge
Otu000490	Bacteria	Actinobacteriota	Thermoleophilia	Gaiellales	uncultured	uncultured_ge
Otu000491	Bacteria	Acidobacteriota	Vicinamibacteria	Vicinamibacterales	Vicinamibacteraceae	Luteitalea
Otu000492	Bacteria	Proteobacteria	Alphaproteobacteria	Rhizobiales	Hyphomicrobiaceae	Hyphomicrobiaceae_unclassified
Otu000493	Bacteria	Proteobacteria	Gammaproteobacteria	Burkholderiales	Comamonadaceae	Ramlibacter
Otu000494	Bacteria	Firmicutes	Bacilli	Bacillales	Bacillaceae	Bacillus
Otu000495	Bacteria	Chloroflexi	Ktedonobacteria	B12-WMSP1	B12-WMSP1_fa	B12-WMSP1_ge
Otu000496	Bacteria	Acidobacteriota	Acidobacteriae	Acidobacteriales	uncultured	uncultured_ge
Otu000497	Bacteria	Proteobacteria	Alphaproteobacteria	Rhizobiales	Beijerinckiaceae	Microvirga
Otu000498	Bacteria	Proteobacteria	Gammaproteobacteria	Burkholderiales	Oxalobacteraceae	Oxalobacteraceae_unclassified
Otu000499	Bacteria	Actinobacteriota	Actinobacteria	Catenulisporales	Catenulisporaceae	Catenulispora
Otu000500	Bacteria	Actinobacteriota	Thermoleophilia	Solirubrobacterales	Solirubrobacteraceae	Conexibacter
Otu000501	Bacteria	Actinobacteriota	Actinobacteria	Frankiales	Acidothermaceae	Acidothermus
Otu000502	Bacteria	Proteobacteria	Alphaproteobacteria	Rhodobacterales	Rhodobacteraceae	Amaricoccus
Otu000503	Bacteria	Desulfobacterota	uncultured	uncultured_or	uncultured_fa	uncultured_ge
Otu000504	Bacteria	Actinobacteriota	Thermoleophilia	Solirubrobacterales	Solirubrobacteraceae	Conexibacter
Otu000505	Bacteria	Actinobacteriota	Acidimicrobiia	IMCC26256	IMCC26256_fa	IMCC26256_ge
Otu000506	Bacteria	Myxococcota	Polyangia	Polyangiales	Sandaracinaceae	uncultured
Otu000507	Bacteria	Chloroflexi	Ktedonobacteria	Ktedonobacterales	Ktedonobacteraceae	Ktedonobacteraceae_unclassified
Otu000508	Bacteria	Chloroflexi	Chloroflexia	Thermomicrobiales	JG30-KF-CM45	JG30-KF-CM45_ge
Otu000509	Bacteria	Chloroflexi	KD4-96	KD4-96_or	KD4-96_fa	KD4-96_ge
Otu000510	Bacteria	Proteobacteria	Alphaproteobacteria	Rhizobiales	Rhizobiales_Incertae_Sedis	Bauldia
Otu000511	Bacteria	Proteobacteria	Gammaproteobacteria	Burkholderiales	Oxalobacteraceae	Pseudoduganella
Otu000512	Bacteria	Actinobacteriota	Acidimicrobiia	Acidimicrobiia_unclassified	Acidimicrobiia_unclassified	Acidimicrobiia_unclassified
Otu000513	Bacteria	Actinobacteriota	Actinobacteria	Streptosporangiales	Streptosporangiaceae	Microbispora
Otu000514	Bacteria	Chloroflexi	Chloroflexia	Chloroflexales	Roseiflexaceae	uncultured
Otu000515	Bacteria	Actinobacteriota	Actinobacteria	Propionibacteriales	Nocardioidaceae	Nocardioides
Otu000516	Bacteria	Acidobacteriota	Acidobacteriae	Acidobacteriales	Koribacteraceae	Candidatus_Koribacter
Otu000517	Bacteria	Verrucomicrobiota	Verrucomicrobiae	Chthoniobacterales	Chthoniobacteraceae	Candidatus_Udaeobacter
Otu000518	Bacteria	Chloroflexi	Ktedonobacteria	Ktedonobacterales	Ktedonobacteraceae	JG30a-KF-32
Otu000519	Bacteria	Chloroflexi	KD4-96	KD4-96_or	KD4-96_fa	KD4-96_ge
Otu000520	Bacteria	Chloroflexi	TK10	TK10_or	TK10_fa	TK10_ge
Otu000521	Bacteria	Myxococcota	Polyangia	Haliangiales	Haliangiaceae	Haliangium
Otu000522	Bacteria	Bacteria_unclassified	Bacteria_unclassified	Bacteria_unclassified	Bacteria_unclassified	Bacteria_unclassified
Otu000523	Bacteria	Bacteria_unclassified	Bacteria_unclassified	Bacteria_unclassified	Bacteria_unclassified	Bacteria_unclassified
Otu000524	Bacteria	Acidobacteriota	Vicinamibacteria	Vicinamibacterales	uncultured	uncultured_ge
Otu000525	Bacteria	Proteobacteria	Gammaproteobacteria	Burkholderiales	Comamonadaceae	Rhizobacter
Otu000526	Bacteria	Proteobacteria	Alphaproteobacteria	Rhizobiales	Xanthobacteraceae	Rhodopseudomonas
Otu000527	Bacteria	Bacteroidota	Bacteroidia	Chitinophagales	Chitinophagaceae	uncultured
Otu000528	Bacteria	Bacteroidota	Bacteroidia	Chitinophagales	Chitinophagaceae	Flavisolibacter
Otu000529	Bacteria	Chloroflexi	Chloroflexia	Thermomicrobiales	JG30-KF-CM45	JG30-KF-CM45_ge
Otu000530	Bacteria	Firmicutes	Bacilli	Paenibacillales	Paenibacillaceae	Paenibacillus
Otu000531	Bacteria	Proteobacteria	Alphaproteobacteria	Elsterales	uncultured	uncultured_ge
Otu000532	Bacteria	Actinobacteriota	Acidimicrobiia	IMCC26256	IMCC26256_fa	IMCC26256_ge
Otu000533	Bacteria	Acidobacteriota	Acidobacteriae	Bryobacterales	Bryobacteraceae	Bryobacter
Otu000534	Bacteria	Myxococcota	Polyangia	Polyangiales	Phaselicystidaceae	Phaselicystis
Otu000535	Bacteria	Chloroflexi	Ktedonobacteria	B12-WMSP1	B12-WMSP1_fa	B12-WMSP1_ge
Otu000536	Bacteria	Actinobacteriota	Thermoleophilia	Gaiellales	uncultured	uncultured_ge
Otu000537	Bacteria	Proteobacteria	Gammaproteobacteria	Enterobacterales	Yersiniaceae	Serratia
Otu000538	Bacteria	Actinobacteriota	MB-A2-108	MB-A2-108_or	MB-A2-108_fa	MB-A2-108_ge
Otu000539	Bacteria	Actinobacteriota	Actinobacteria	Propionibacteriales	Nocardioidaceae	Nocardioides
Otu000540	Bacteria	Chloroflexi	Chloroflexia	Chloroflexales	Roseiflexaceae	uncultured
Otu000541	Bacteria	Proteobacteria	Alphaproteobacteria	Sphingomonadales	Sphingomonadaceae	Sphingobium
Otu000542	Bacteria	Proteobacteria	Gammaproteobacteria	Burkholderiales	A21b	A21b_ge
Otu000543	Bacteria	Actinobacteriota	Actinobacteria	Pseudonocardiales	Pseudonocardiaceae	Pseudonocardia
Otu000544	Bacteria	Proteobacteria	Alphaproteobacteria	Rhizobiales	Xanthobacteraceae	Pseudolabrys
Otu000545	Bacteria	RCP2-54	RCP2-54_cl	RCP2-54_or	RCP2-54_fa	RCP2-54_ge
Otu000546	Bacteria	Actinobacteriota	Thermoleophilia	Gaiellales	uncultured	uncultured_ge
Otu000547	Bacteria	Actinobacteriota	Acidimicrobiia	IMCC26256	IMCC26256_fa	IMCC26256_ge
Otu000548	Bacteria	Gemmatimonadota	Gemmatimonadetes	Gemmatimonadales	Gemmatimonadaceae	uncultured
Otu000549	Bacteria	Chloroflexi	Ktedonobacteria	Ktedonobacterales	Ktedonobacteraceae	HSB_OF53-F07
Otu000550	Bacteria	Chloroflexi	KD4-96	KD4-96_or	KD4-96_fa	KD4-96_ge
Otu000551	Bacteria	Firmicutes	Bacilli	Paenibacillales	Paenibacillaceae	Paenibacillus
Otu000552	Bacteria	Actinobacteriota	Actinobacteria	Frankiales	Geodermatophilaceae	Blastococcus
Otu000553	Bacteria	Bacteroidota	Bacteroidia	Chitinophagales	Chitinophagaceae	Chitinophagaceae_unclassified
Otu000554	Bacteria	Acidobacteriota	Vicinamibacteria	Vicinamibacterales	uncultured	uncultured_ge
Otu000555	Bacteria	Acidobacteriota	Acidobacteriae	Solibacterales	Solibacteraceae	Candidatus_Solibacter
Otu000556	Bacteria	Acidobacteriota	Vicinamibacteria	Vicinamibacterales	uncultured	uncultured_ge
Otu000557	Bacteria	Myxococcota	Polyangia	Polyangiales	Polyangiaceae	Sorangium
Otu000558	Bacteria	Myxococcota	Myxococcia	Myxococcales	Myxococcaceae	Myxococcaceae_unclassified
Otu000559	Bacteria	Proteobacteria	Alphaproteobacteria	Micropepsales	Micropepsaceae	uncultured
Otu000560	Bacteria	Proteobacteria	Gammaproteobacteria	Burkholderiales	Nitrosomonadaceae	mle1-7
Otu000561	Bacteria	Chloroflexi	Chloroflexia	Thermomicrobiales	JG30-KF-CM45	JG30-KF-CM45_ge
Otu000562	Bacteria	Proteobacteria	Alphaproteobacteria	Sphingomonadales	Sphingomonadaceae	Sphingobium
Otu000563	Bacteria	Proteobacteria	Gammaproteobacteria	Burkholderiales	SC-I-84	SC-I-84_ge
Otu000564	Bacteria	Bacteroidota	Bacteroidia	Cytophagales	Microscillaceae	Chryseolinea
Otu000565	Bacteria	Chloroflexi	Ktedonobacteria	C0119	C0119_fa	C0119_ge
Otu000566	Bacteria	Myxococcota	Polyangia	Polyangiales	Polyangiaceae	Pajaroellobacter
Otu000567	Bacteria	Proteobacteria	Gammaproteobacteria	Burkholderiales	Burkholderiaceae	Burkholderia-Caballeronia-Paraburkholderia
Otu000568	Bacteria	Proteobacteria	Alphaproteobacteria	Rhizobiales	Methyloligellaceae	Methyloligellaceae_unclassified
Otu000569	Bacteria	Chloroflexi	Ktedonobacteria	Ktedonobacterales	Ktedonobacteraceae	G12-WMSP1
Otu000570	Bacteria	Proteobacteria	Alphaproteobacteria	Acetobacterales	Acetobacteraceae	Acetobacteraceae_unclassified
Otu000571	Bacteria	Proteobacteria	Gammaproteobacteria	Burkholderiales	Comamonadaceae	Azohydromonas
Otu000572	Bacteria	Actinobacteriota	Actinobacteria	Micromonosporales	Micromonosporaceae	Micromonosporaceae_unclassified
Otu000573	Bacteria	Proteobacteria	Gammaproteobacteria	Xanthomonadales	Rhodanobacteraceae	Dyella
Otu000574	Bacteria	Acidobacteriota	Vicinamibacteria	Vicinamibacterales	uncultured	uncultured_ge
Otu000575	Bacteria	Gemmatimonadota	Gemmatimonadetes	Gemmatimonadales	Gemmatimonadaceae	Gemmatimonas
Otu000576	Bacteria	Actinobacteriota	Actinobacteria	Micrococcales	Microbacteriaceae	Yonghaparkia
Otu000577	Bacteria	Proteobacteria	Alphaproteobacteria	Rhizobiales	Beijerinckiaceae	Beijerinckiaceae_unclassified
Otu000578	Bacteria	Actinobacteriota	Thermoleophilia	Solirubrobacterales	67-14	67-14_ge
Otu000579	Bacteria	Actinobacteriota	Thermoleophilia	Solirubrobacterales	Solirubrobacteraceae	uncultured
Otu000580	Bacteria	Gemmatimonadota	Gemmatimonadetes	Gemmatimonadales	Gemmatimonadaceae	Gemmatimonas
Otu000581	Bacteria	Actinobacteriota	Actinobacteria	Frankiales	Acidothermaceae	Acidothermus
Otu000582	Bacteria	Chloroflexi	KD4-96	KD4-96_or	KD4-96_fa	KD4-96_ge
Otu000583	Bacteria	Proteobacteria	Alphaproteobacteria	Rhizobiales	uncultured	uncultured_ge
Otu000584	Bacteria	Acidobacteriota	Acidobacteriae	Acidobacteriales	Acidobacteriaceae_	Granulicella	100)
Otu000585	Bacteria	Acidobacteriota	Acidobacteriae	Acidobacteriales	Acidobacteriaceae_	Acidobacteriaceae_
Otu000586	Bacteria	Proteobacteria	Gammaproteobacteria	Burkholderiales	Burkholderiaceae	Burkholderia-Caballeronia-Paraburkholderia
Otu000587	Bacteria	Actinobacteriota	Thermoleophilia	Solirubrobacterales	67-14	67-14_ge
Otu000588	Bacteria	Actinobacteriota	Thermoleophilia	Solirubrobacterales	67-14	67-14_ge
Otu000589	Bacteria	Firmicutes	Bacilli	Bacillales	Planococcaceae	Psychrobacillus
Otu000590	Bacteria	Proteobacteria	Alphaproteobacteria	Rhizobiales	Rhizobiales_Incertae_Sedis	Bauldia
Otu000591	Bacteria	Bacteroidota	Bacteroidia	Flavobacteriales	Weeksellaceae	Chryseobacterium
Otu000592	Bacteria	Acidobacteriota	Vicinamibacteria	Vicinamibacterales	Vicinamibacteraceae	Vicinamibacteraceae_ge
Otu000593	Bacteria	Proteobacteria	Gammaproteobacteria	Xanthomonadales	Xanthomonadaceae	Stenotrophomonas
Otu000594	Bacteria	Acidobacteriota	Blastocatellia	45985	11-24_fa	11-24_ge
Otu000595	Bacteria	Proteobacteria	Alphaproteobacteria	Rhodobacterales	Rhodobacteraceae	Rhodobacteraceae_unclassified
Otu000596	Bacteria	Actinobacteriota	Actinobacteria	Propionibacteriales	Nocardioidaceae	Nocardioides
Otu000597	Bacteria	Actinobacteriota	Actinobacteria	Micromonosporales	Micromonosporaceae	Micromonosporaceae_unclassified
Otu000598	Bacteria	Proteobacteria	Alphaproteobacteria	Elsterales	uncultured	uncultured_ge
Otu000599	Bacteria	Proteobacteria	Alphaproteobacteria	Rhizobiales	Xanthobacteraceae	Xanthobacteraceae_unclassified
Otu000600	Bacteria	Proteobacteria	Alphaproteobacteria	Rhodobacterales	Rhodobacteraceae	Amaricoccus
Otu000601	Bacteria	Gemmatimonadota	Gemmatimonadetes	Gemmatimonadales	Gemmatimonadaceae	uncultured
Otu000602	Bacteria	Chloroflexi	Chloroflexia	Thermomicrobiales	JG30-KF-CM45	JG30-KF-CM45_ge
Otu000603	Bacteria	Chloroflexi	Chloroflexia	Chloroflexales	Roseiflexaceae	uncultured
Otu000604	Bacteria	Firmicutes	Bacilli	Paenibacillales	Paenibacillaceae	Paenibacillus
Otu000605	Bacteria	Acidobacteriota	Vicinamibacteria	Vicinamibacterales	uncultured	uncultured_ge
Otu000606	Bacteria	Actinobacteriota	Actinobacteria	Pseudonocardiales	Pseudonocardiaceae	Actinomycetospora
Otu000607	Bacteria	Actinobacteriota	Acidimicrobiia	Microtrichales	Ilumatobacteraceae	CL500-29_marine_group
Otu000608	Bacteria	Actinobacteriota	Acidimicrobiia	Microtrichales	Ilumatobacteraceae	Ilumatobacteraceae_unclassified
Otu000609	Bacteria	Chloroflexi	Chloroflexia	Thermomicrobiales	Thermomicrobiaceae	Sphaerobacter
Otu000610	Bacteria	Proteobacteria	Alphaproteobacteria	Caulobacterales	Caulobacteraceae	uncultured
Otu000611	Bacteria	Actinobacteriota	Actinobacteria	Micrococcales	Dermacoccaceae	Flexivirga
Otu000612	Bacteria	Bacteroidota	Bacteroidia	Flavobacteriales	Flavobacteriaceae	Flavobacterium
Otu000613	Bacteria	Chloroflexi	Ktedonobacteria	Ktedonobacterales	Ktedonobacteraceae	Ktedonobacteraceae_unclassified
Otu000614	Bacteria	Proteobacteria	Alphaproteobacteria	Rhizobiales	Beijerinckiaceae	Beijerinckiaceae_unclassified
Otu000615	Bacteria	Chloroflexi	Ktedonobacteria	Ktedonobacterales	JG30-KF-AS9	JG30-KF-AS9_ge
Otu000616	Bacteria	Proteobacteria	Alphaproteobacteria	Micropepsales	Micropepsaceae	uncultured
Otu000617	Bacteria	Proteobacteria	Alphaproteobacteria	Acetobacterales	Acetobacteraceae	Acidiphilium
Otu000618	Bacteria	Chloroflexi	Ktedonobacteria	Ktedonobacterales	JG30-KF-AS9	JG30-KF-AS9_ge
Otu000619	Bacteria	Chloroflexi	Ktedonobacteria	B12-WMSP1	B12-WMSP1_fa	B12-WMSP1_ge
Otu000620	Bacteria	Acidobacteriota	Acidobacteriae	Acidobacteriales	uncultured	uncultured_ge
Otu000621	Bacteria	Firmicutes	Bacilli	Bacillales	Planococcaceae	Lysinibacillus
Otu000622	Bacteria	Actinobacteriota	Actinobacteria	Pseudonocardiales	Pseudonocardiaceae	Pseudonocardia
Otu000623	Bacteria	Actinobacteriota	Actinobacteria	Propionibacteriales	Nocardioidaceae	Nocardioides
Otu000624	Bacteria	Acidobacteriota	Acidobacteriae	Subgroup_2	Subgroup_2_fa	Subgroup_2_ge
Otu000625	Bacteria	Proteobacteria	Alphaproteobacteria	Rhizobiales	Rhizobiaceae	Mesorhizobium
Otu000626	Bacteria	Acidobacteriota	Vicinamibacteria	Vicinamibacterales	uncultured	uncultured_ge
Otu000627	Bacteria	Acidobacteriota	Acidobacteriae	Acidobacteriales	Koribacteraceae	Candidatus_Koribacter
Otu000628	Bacteria	Acidobacteriota	Blastocatellia	Blastocatellales	Blastocatellaceae	JGI_0001001-H03
Otu000629	Bacteria	Actinobacteriota	Actinobacteria	Propionibacteriales	Propionibacteriaceae	Friedmanniella
Otu000630	Bacteria	Actinobacteriota	Thermoleophilia	Solirubrobacterales	Solirubrobacteraceae	Conexibacter
Otu000631	Bacteria	Proteobacteria	Alphaproteobacteria	Rhizobiales	Amb-16S-1323	Amb-16S-1323_ge
Otu000632	Bacteria	Proteobacteria	Alphaproteobacteria	Rhizobiales	Hyphomicrobiaceae	Pedomicrobium
Otu000633	Bacteria	Actinobacteriota	Thermoleophilia	Gaiellales	Gaiellaceae	Gaiella
Otu000634	Bacteria	Gemmatimonadota	Gemmatimonadetes	Gemmatimonadales	Gemmatimonadaceae	uncultured
Otu000635	Bacteria	Actinobacteriota	Thermoleophilia	Gaiellales	uncultured	uncultured_ge
Otu000636	Bacteria	Actinobacteriota	Thermoleophilia	Solirubrobacterales	67-14	67-14_ge
Otu000637	Bacteria	Proteobacteria	Alphaproteobacteria	Rhizobiales	Xanthobacteraceae	uncultured
Otu000638	Bacteria	Acidobacteriota	Thermoanaerobaculia	Thermoanaerobaculales	Thermoanaerobaculaceae	Subgroup_10
Otu000639	Bacteria	Actinobacteriota	Thermoleophilia	Gaiellales	uncultured	uncultured_ge
Otu000640	Bacteria	Proteobacteria	Gammaproteobacteria	Burkholderiales	Burkholderiaceae	Burkholderia-Caballeronia-Paraburkholderia
Otu000641	Bacteria	Acidobacteriota	Acidobacteriae	Acidobacteriales	uncultured	uncultured_ge
Otu000642	Bacteria	Actinobacteriota	Thermoleophilia	Gaiellales	uncultured	uncultured_ge
Otu000643	Bacteria	Firmicutes	Bacilli	Paenibacillales	Paenibacillaceae	Paenibacillus
Otu000644	Bacteria	Chloroflexi	Chloroflexia	Thermomicrobiales	JG30-KF-CM45	JG30-KF-CM45_ge
Otu000645	Bacteria	Actinobacteriota	MB-A2-108	MB-A2-108_or	MB-A2-108_fa	MB-A2-108_ge
Otu000646	Bacteria	Actinobacteriota	Thermoleophilia	Gaiellales	uncultured	uncultured_ge
Otu000647	Bacteria	Actinobacteriota	Acidimicrobiia	Microtrichales	uncultured	uncultured_ge
Otu000648	Bacteria	Chloroflexi	Chloroflexia	Thermomicrobiales	JG30-KF-CM45	JG30-KF-CM45_ge
Otu000649	Bacteria	Proteobacteria	Gammaproteobacteria	Burkholderiales	Oxalobacteraceae	Massilia
Otu000650	Bacteria	Firmicutes	Bacilli	Paenibacillales	Paenibacillaceae	Paenibacillus
Otu000651	Bacteria	Proteobacteria	Gammaproteobacteria	Xanthomonadales	Rhodanobacteraceae	Rhodanobacter
Otu000652	Bacteria	Actinobacteriota	Actinobacteria	Catenulisporales	Catenulisporaceae	Catenulispora
Otu000653	Bacteria	Actinobacteriota	Acidimicrobiia	Microtrichales	Ilumatobacteraceae	CL500-29_marine_group
Otu000654	Bacteria	Proteobacteria	Alphaproteobacteria	Rhizobiales	Xanthobacteraceae	Xanthobacteraceae_unclassified
Otu000655	Bacteria	Proteobacteria	Alphaproteobacteria	Rhizobiales	Xanthobacteraceae	Tardiphaga
Otu000656	Bacteria	Proteobacteria	Gammaproteobacteria	Xanthomonadales	Rhodanobacteraceae	Dokdonella
Otu000657	Bacteria	Actinobacteriota	Thermoleophilia	Solirubrobacterales	Solirubrobacteraceae	Solirubrobacteraceae_unclassified
Otu000658	Bacteria	Verrucomicrobiota	Verrucomicrobiae	Chthoniobacterales	Chthoniobacteraceae	Candidatus_Udaeobacter
Otu000659	Bacteria	Proteobacteria	Alphaproteobacteria	Elsterales	uncultured	uncultured_ge
Otu000660	Bacteria	Chloroflexi	Ktedonobacteria	Ktedonobacterales	Ktedonobacteraceae	JG30a-KF-32
Otu000661	Bacteria	Bacteroidota	Bacteroidia	Chitinophagales	Chitinophagaceae	uncultured
Otu000662	Bacteria	Proteobacteria	Gammaproteobacteria	Burkholderiales	SC-I-84	SC-I-84_ge
Otu000663	Bacteria	Proteobacteria	Gammaproteobacteria	Enterobacterales	Erwiniaceae	Erwiniaceae_unclassified
Otu000664	Bacteria	Proteobacteria	Alphaproteobacteria	uncultured	uncultured_fa	uncultured_ge
Otu000665	Bacteria	Proteobacteria	Gammaproteobacteria	Burkholderiales	Burkholderiaceae	Cupriavidus
Otu000666	Bacteria	Proteobacteria	Alphaproteobacteria	Rhizobiales	Rhizobiaceae	Ensifer
Otu000667	Bacteria	Proteobacteria	Alphaproteobacteria	Rhizobiales	A0839	A0839_ge
Otu000668	Bacteria	Proteobacteria	Alphaproteobacteria	Caulobacterales	Caulobacteraceae	Caulobacteraceae_unclassified
Otu000669	Bacteria	Chloroflexi	KD4-96	KD4-96_or	KD4-96_fa	KD4-96_ge
Otu000670	Bacteria	Chloroflexi	Ktedonobacteria	C0119	C0119_fa	C0119_ge
Otu000671	Bacteria	Actinobacteriota	Actinobacteria	Micrococcales	Microbacteriaceae	Amnibacterium
Otu000672	Bacteria	Actinobacteriota	Thermoleophilia	Gaiellales	Gaiellales_unclassified	Gaiellales_unclassified
Otu000673	Bacteria	Actinobacteriota	Acidimicrobiia	Microtrichales	uncultured	uncultured_ge
Otu000674	Bacteria	Actinobacteriota	Actinobacteria	Kineosporiales	Kineosporiaceae	Quadrisphaera
Otu000675	Bacteria	Chloroflexi	Chloroflexia	Chloroflexales	Roseiflexaceae	uncultured
Otu000676	Bacteria	Acidobacteriota	Thermoanaerobaculia	Thermoanaerobaculales	Thermoanaerobaculaceae	Subgroup_10
Otu000677	Bacteria	Proteobacteria	Alphaproteobacteria	Rhizobiales	Xanthobacteraceae	Xanthobacteraceae_unclassified
Otu000678	Bacteria	Acidobacteriota	Vicinamibacteria	Subgroup_17	Subgroup_17_fa	Subgroup_17_ge
Otu000679	Bacteria	Bacteroidota	Bacteroidia	Chitinophagales	Chitinophagaceae	Flavitalea
Otu000680	Bacteria	WPS-2	WPS-2_cl	WPS-2_or	WPS-2_fa	WPS-2_ge
Otu000681	Bacteria	Actinobacteriota	Actinobacteria	Micromonosporales	Micromonosporaceae	Hamadaea
Otu000682	Bacteria	Actinobacteriota	Thermoleophilia	Solirubrobacterales	Solirubrobacteraceae	Conexibacter
Otu000683	Bacteria	Actinobacteriota	Actinobacteria	Pseudonocardiales	Pseudonocardiaceae	Amycolatopsis
Otu000684	Bacteria	Methylomirabilota	Methylomirabilia	Rokubacteriales	Rokubacteriales_fa	Rokubacteriales_ge
Otu000685	Bacteria	Chloroflexi	TK10	TK10_or	TK10_fa	TK10_ge
Otu000686	Bacteria	Acidobacteriota	Thermoanaerobaculia	Thermoanaerobaculales	Thermoanaerobaculaceae	Subgroup_10
Otu000687	Bacteria	Proteobacteria	Gammaproteobacteria	Xanthomonadales	Xanthomonadaceae	Xanthomonadaceae_unclassified
Otu000688	Bacteria	Proteobacteria	Alphaproteobacteria	Rhizobiales	Rhizobiales_Incertae_Sedis	uncultured
Otu000689	Bacteria	Chloroflexi	Chloroflexia	Thermomicrobiales	JG30-KF-CM45	JG30-KF-CM45_ge
Otu000690	Bacteria	Chloroflexi	Ktedonobacteria	Ktedonobacterales	Ktedonobacteraceae	1921-3
Otu000691	Bacteria	Actinobacteriota	Actinobacteria	Micrococcales	Microbacteriaceae	Curtobacterium
Otu000692	Bacteria	Actinobacteriota	Thermoleophilia	Gaiellales	Gaiellales_unclassified	Gaiellales_unclassified
Otu000693	Bacteria	Actinobacteriota	Thermoleophilia	Gaiellales	Gaiellaceae	Gaiella
Otu000694	Bacteria	Actinobacteriota	Acidimicrobiia	IMCC26256	IMCC26256_fa	IMCC26256_ge
Otu000695	Bacteria	Actinobacteriota	Actinobacteria	Propionibacteriales	Nocardioidaceae	Nocardioides
Otu000696	Bacteria	Proteobacteria	Gammaproteobacteria	Xanthomonadales	Xanthomonadaceae	Xanthomonadaceae_unclassified
Otu000697	Bacteria	Chloroflexi	Chloroflexia	Chloroflexales	Roseiflexaceae	uncultured
Otu000698	Bacteria	Firmicutes	Bacilli	Bacillales	Bacillaceae	Bacillaceae_unclassified
Otu000699	Bacteria	Acidobacteriota	Blastocatellia	Pyrinomonadales	Pyrinomonadaceae	RB41
Otu000700	Bacteria	Actinobacteriota	Actinobacteria	Micromonosporales	Micromonosporaceae	Luedemannella
Otu000701	Bacteria	Bacteroidota	Bacteroidia	Chitinophagales	Chitinophagaceae	Niastella
Otu000702	Bacteria	Actinobacteriota	Actinobacteria	Micromonosporales	Micromonosporaceae	Micromonosporaceae_unclassified
Otu000703	Bacteria	Proteobacteria	Gammaproteobacteria	Burkholderiales	Nitrosomonadaceae	mle1-7
Otu000704	Bacteria	Proteobacteria	Gammaproteobacteria	Burkholderiales	SC-I-84	SC-I-84_ge
Otu000705	Bacteria	Firmicutes	Bacilli	Bacillales	Sporolactobacillaceae	Pullulanibacillus
Otu000706	Bacteria	Methylomirabilota	Methylomirabilia	Rokubacteriales	Rokubacteriales_fa	Rokubacteriales_ge
Otu000707	Bacteria	Gemmatimonadota	Gemmatimonadetes	Gemmatimonadales	Gemmatimonadaceae	Gemmatimonadaceae_unclassified
Otu000708	Bacteria	Chloroflexi	Anaerolineae	Caldilineales	Caldilineaceae	uncultured
Otu000709	Bacteria	Firmicutes	Bacilli	Alicyclobacillales	Alicyclobacillaceae	Tumebacillus
Otu000710	Bacteria	Myxococcota	Polyangia	Polyangiales	Sandaracinaceae	uncultured
Otu000711	Bacteria	Proteobacteria	Gammaproteobacteria	Xanthomonadales	Xanthomonadaceae	Lysobacter
Otu000712	Bacteria	Myxococcota	Polyangia	Polyangiales	BIrii41	BIrii41_ge
Otu000713	Bacteria	Actinobacteriota	Actinobacteria	Propionibacteriales	Nocardioidaceae	Nocardioides
Otu000714	Bacteria	Acidobacteriota	Vicinamibacteria	Vicinamibacterales	uncultured	uncultured_ge
Otu000715	Bacteria	Myxococcota	Polyangia	Haliangiales	Haliangiaceae	Haliangium
Otu000716	Bacteria	Actinobacteriota	Actinobacteria	Propionibacteriales	Nocardioidaceae	Nocardioides
Otu000717	Bacteria	Proteobacteria	Alphaproteobacteria	Sphingomonadales	Sphingomonadaceae	Qipengyuania
Otu000718	Bacteria	Acidobacteriota	Holophagae	Subgroup_7	Subgroup_7_fa	Subgroup_7_ge
Otu000719	Bacteria	Actinobacteriota	Thermoleophilia	Solirubrobacterales	Solirubrobacteraceae	Solirubrobacter
Otu000720	Bacteria	Proteobacteria	Alphaproteobacteria	Rhizobiales	Beijerinckiaceae	Psychroglaciecola
Otu000721	Bacteria	Acidobacteriota	Acidobacteriae	Acidobacteriales	Acidobacteriaceae_	uncultured
Otu000722	Bacteria	Myxococcota	Polyangia	Polyangiales	BIrii41	BIrii41_ge
Otu000723	Bacteria	Firmicutes	Bacilli	Alicyclobacillales	Alicyclobacillaceae	Tumebacillus
Otu000724	Bacteria	Actinobacteriota	Actinobacteria	Streptomycetales	Streptomycetaceae	Streptomyces
Otu000725	Bacteria	Bacteroidota	Bacteroidia	Chitinophagales	Chitinophagaceae	Terrimonas
Otu000726	Bacteria	Proteobacteria	Gammaproteobacteria	Xanthomonadales	Rhodanobacteraceae	Rhodanobacter
Otu000727	Bacteria	Actinobacteriota	Thermoleophilia	Solirubrobacterales	Solirubrobacteraceae	Solirubrobacter
Otu000728	Bacteria	Proteobacteria	Gammaproteobacteria	Xanthomonadales	Rhodanobacteraceae	Rhodanobacter
Otu000729	Bacteria	Actinobacteriota	MB-A2-108	MB-A2-108_or	MB-A2-108_fa	MB-A2-108_ge
Otu000731	Bacteria	Actinobacteriota	Thermoleophilia	Gaiellales	uncultured	uncultured_ge
Otu000732	Bacteria	Actinobacteriota	Acidimicrobiia	uncultured	uncultured_fa	uncultured_ge
Otu000733	Bacteria	Bacteroidota	Bacteroidia	Sphingobacteriales	Sphingobacteriaceae	Mucilaginibacter
Otu000734	Bacteria	Actinobacteriota	Actinobacteria	Micromonosporales	Micromonosporaceae	Micromonosporaceae_unclassified
Otu000735	Bacteria	Proteobacteria	Alphaproteobacteria	Rhodobacterales	Rhodobacteraceae	Amaricoccus
Otu000736	Bacteria	Proteobacteria	Gammaproteobacteria	Xanthomonadales	Rhodanobacteraceae	Rhodanobacteraceae_unclassified
Otu000737	Bacteria	Proteobacteria	Alphaproteobacteria	Rhizobiales	Labraceae	Labrys
Otu000738	Bacteria	Actinobacteriota	Thermoleophilia	uncultured	uncultured_fa	uncultured_ge
Otu000739	Bacteria	Firmicutes	Bacilli	Paenibacillales	Paenibacillaceae	Paenibacillus
Otu000740	Bacteria	Proteobacteria	Gammaproteobacteria	Xanthomonadales	Xanthomonadaceae	Lysobacter
Otu000741	Bacteria	Acidobacteriota	Vicinamibacteria	Vicinamibacterales	uncultured	uncultured_ge
Otu000742	Bacteria	Acidobacteriota	Acidobacteriae	Bryobacterales	Bryobacteraceae	Bryobacter
Otu000743	Bacteria	Verrucomicrobiota	Verrucomicrobiae	Pedosphaerales	Pedosphaeraceae	ADurb.Bin063-1
Otu000744	Bacteria	Gemmatimonadota	Gemmatimonadetes	Gemmatimonadales	Gemmatimonadaceae	Gemmatimonas
Otu000745	Bacteria	Chloroflexi	Chloroflexia	Chloroflexales	Roseiflexaceae	uncultured
Otu000746	Bacteria	Chloroflexi	Ktedonobacteria	Ktedonobacterales	Ktedonobacteraceae	Ktedonobacteraceae_unclassified
Otu000747	Bacteria	Proteobacteria	Alphaproteobacteria	Rhizobiales	Rhizobiaceae	Rhizobiaceae_unclassified
Otu000748	Bacteria	Proteobacteria	Alphaproteobacteria	Rhizobiales	Xanthobacteraceae	Pseudolabrys
Otu000749	Bacteria	Acidobacteriota	Blastocatellia	Blastocatellales	Blastocatellaceae	JGI_0001001-H03
Otu000750	Bacteria	Firmicutes	Bacilli	Bacillales	Bacillaceae	Bacillus
Otu000751	Bacteria	Gemmatimonadota	Gemmatimonadetes	Gemmatimonadales	Gemmatimonadaceae	Gemmatimonadaceae_unclassified
Otu000752	Bacteria	Chloroflexi	Chloroflexia	Thermomicrobiales	JG30-KF-CM45	JG30-KF-CM45_ge
Otu000753	Bacteria	Bacteria_unclassified	Bacteria_unclassified	Bacteria_unclassified	Bacteria_unclassified	Bacteria_unclassified
Otu000754	Bacteria	Acidobacteriota	Vicinamibacteria	Vicinamibacterales	uncultured	uncultured_ge
Otu000755	Bacteria	Acidobacteriota	Acidobacteriae	Bryobacterales	Bryobacteraceae	Bryobacter
Otu000756	Bacteria	Actinobacteriota	Actinobacteria	Micromonosporales	Micromonosporaceae	Virgisporangium
Otu000757	Bacteria	Proteobacteria	Alphaproteobacteria	Elsterales	uncultured	uncultured_ge
Otu000758	Bacteria	Proteobacteria	Alphaproteobacteria	Rhizobiales	Rhizobiales_Incertae_Sedis	Bauldia
Otu000759	Bacteria	Bacteroidota	Bacteroidia	Chitinophagales	Chitinophagaceae	Flavisolibacter
Otu000760	Bacteria	Chloroflexi	TK10	TK10_or	TK10_fa	TK10_ge
Otu000761	Bacteria	Chloroflexi	Ktedonobacteria	Ktedonobacterales	Ktedonobacteraceae	Ktedonobacteraceae_unclassified
Otu000762	Bacteria	Gemmatimonadota	Gemmatimonadetes	Gemmatimonadales	Gemmatimonadaceae	uncultured
Otu000763	Bacteria	Acidobacteriota	Acidobacteriae	Solibacterales	Solibacteraceae	Candidatus_Solibacter
Otu000764	Bacteria	Acidobacteriota	Blastocatellia	Pyrinomonadales	Pyrinomonadaceae	RB41
Otu000765	Bacteria	Gemmatimonadota	Gemmatimonadetes	Gemmatimonadales	Gemmatimonadaceae	uncultured
Otu000766	Bacteria	Actinobacteriota	Acidimicrobiia	Microtrichales	Iamiaceae	Iamia
Otu000767	Bacteria	Proteobacteria	Gammaproteobacteria	Burkholderiales	Burkholderiaceae	Cupriavidus
Otu000768	Bacteria	Gemmatimonadota	Gemmatimonadetes	Gemmatimonadales	Gemmatimonadaceae	Gemmatimonas
Otu000769	Bacteria	Acidobacteriota	Vicinamibacteria	Vicinamibacterales	uncultured	uncultured_ge
Otu000770	Bacteria	Acidobacteriota	Vicinamibacteria	Vicinamibacterales	Vicinamibacteraceae	Vicinamibacteraceae_ge
Otu000771	Bacteria	Acidobacteriota	Blastocatellia	Blastocatellales	Blastocatellaceae	JGI_0001001-H03
Otu000772	Bacteria	Acidobacteriota	Acidobacteriae	Acidobacteriales	uncultured	uncultured_ge
Otu000773	Bacteria	Gemmatimonadota	Gemmatimonadetes	Gemmatimonadales	Gemmatimonadaceae	Gemmatimonas
Otu000774	Bacteria	Actinobacteriota	Actinobacteria	Frankiales	Frankiaceae	Jatrophihabitans
Otu000775	Bacteria	Acidobacteriota	Vicinamibacteria	Vicinamibacterales	uncultured	uncultured_ge
Otu000776	Bacteria	Proteobacteria	Alphaproteobacteria	Rhizobiales	Kaistiaceae	Kaistia
Otu000777	Bacteria	Bacteroidota	Bacteroidia	Flavobacteriales	Flavobacteriaceae	Flavobacterium
Otu000778	Bacteria	Proteobacteria	Gammaproteobacteria	Burkholderiales	Burkholderiaceae	Cupriavidus
Otu000779	Bacteria	Proteobacteria	Alphaproteobacteria	Rhizobiales	Beijerinckiaceae	Psychroglaciecola
Otu000780	Bacteria	Firmicutes	Bacilli	Bacillales	Bacillaceae	Bacillaceae_unclassified
Otu000781	Bacteria	Proteobacteria	Gammaproteobacteria	Xanthomonadales	Rhodanobacteraceae	Luteibacter
Otu000782	Bacteria	Chloroflexi	Ktedonobacteria	Ktedonobacterales	JG30-KF-AS9	JG30-KF-AS9_ge
Otu000783	Bacteria	Acidobacteriota	Acidobacteriae	Acidobacteriales	Acidobacteriaceae_	Acidipila-Silvibacterium
Otu000784	Bacteria	Proteobacteria	Alphaproteobacteria	Rhodobacterales	Rhodobacteraceae	Amaricoccus
Otu000785	Bacteria	Chloroflexi	Chloroflexia	Thermomicrobiales	JG30-KF-CM45	JG30-KF-CM45_ge
Otu000786	Bacteria	Acidobacteriota	Subgroup_5	Subgroup_5_or	Subgroup_5_fa	Subgroup_5_ge
Otu000788	Bacteria	Proteobacteria	Gammaproteobacteria	Xanthomonadales	Rhodanobacteraceae	Mizugakiibacter
Otu000789	Bacteria	Actinobacteriota	Thermoleophilia	Solirubrobacterales	Solirubrobacteraceae	Solirubrobacteraceae_unclassified
Otu000790	Bacteria	Proteobacteria	Gammaproteobacteria	Burkholderiales	Burkholderiaceae	Burkholderia-Caballeronia-Paraburkholderia
Otu000791	Bacteria	Actinobacteriota	Thermoleophilia	Gaiellales	Gaiellaceae	Gaiella
Otu000793	Bacteria	Actinobacteriota	Actinobacteria	Kineosporiales	Kineosporiaceae	Quadrisphaera
Otu000794	Bacteria	Cyanobacteria	Cyanobacteriia	Leptolyngbyales	Leptolyngbyaceae	Leptolyngbya_Es-Yyy1000
Otu000795	Bacteria	Acidobacteriota	Vicinamibacteria	Vicinamibacterales	uncultured	uncultured_ge
Otu000796	Bacteria	Nitrospirota	Nitrospiria	Nitrospirales	Nitrospiraceae	Nitrospira
Otu000797	Bacteria	Proteobacteria	Alphaproteobacteria	Rhizobiales	Beijerinckiaceae	Microvirga
Otu000798	Bacteria	Chloroflexi	JG30-KF-CM66	JG30-KF-CM66_or	JG30-KF-CM66_fa	JG30-KF-CM66_ge
Otu000799	Bacteria	Firmicutes	Bacilli	Bacillales	Bacillaceae	Bacillus
Otu000800	Bacteria	Bacteroidota	Bacteroidia	Chitinophagales	Chitinophagaceae	uncultured
Otu000801	Bacteria	Proteobacteria	Alphaproteobacteria	Rhizobiales	Beijerinckiaceae	Methylobacterium-Methylorubrum
Otu000802	Bacteria	Actinobacteriota	Thermoleophilia	Solirubrobacterales	Solirubrobacteraceae	Conexibacter
Otu000803	Bacteria	Acidobacteriota	Vicinamibacteria	Vicinamibacterales	uncultured	uncultured_ge
Otu000804	Bacteria	Proteobacteria	Gammaproteobacteria	Xanthomonadales	Rhodanobacteraceae	Luteibacter
Otu000805	Bacteria	Myxococcota	Myxococcia	Myxococcales	Anaeromyxobacteraceae	Anaeromyxobacter
Otu000806	Bacteria	Proteobacteria	Gammaproteobacteria	Gammaproteobacteria_Incertae_Sedis	Unknown_Family	Acidibacter
Otu000807	Bacteria	Actinobacteriota	Actinobacteria	Micromonosporales	Micromonosporaceae	Micromonosporaceae_unclassified
Otu000808	Bacteria	Actinobacteriota	Actinobacteria	Pseudonocardiales	Pseudonocardiaceae	Lechevalieria
Otu000809	Bacteria	Chloroflexi	AD3	AD3_or	AD3_fa	AD3_ge
Otu000810	Bacteria	Proteobacteria	Alphaproteobacteria	Tistrellales	Geminicoccaceae	Candidatus_Alysiosphaera
Otu000811	Bacteria	Chloroflexi	Ktedonobacteria	Ktedonobacterales	Ktedonobacteraceae	FCPS473
Otu000812	Bacteria	Firmicutes	Bacilli	Bacillales	Bacillales_unclassified	Bacillales_unclassified
Otu000813	Bacteria	Proteobacteria	Alphaproteobacteria	Rhizobiales	Devosiaceae	Devosia
Otu000814	Bacteria	Acidobacteriota	Acidobacteriae	Acidobacteriales	Acidobacteriaceae_	Edaphobacter
Otu000815	Bacteria	Proteobacteria	Alphaproteobacteria	Rhizobiales	Rhizobiales_Incertae_Sedis	Alsobacter
Otu000816	Bacteria	Proteobacteria	Alphaproteobacteria	Rhizobiales	Rhizobiales_Incertae_Sedis	Nordella
Otu000817	Bacteria	Gemmatimonadota	Gemmatimonadetes	Gemmatimonadales	Gemmatimonadaceae	Gemmatimonadaceae_unclassified
Otu000818	Bacteria	Chloroflexi	Chloroflexia	Thermomicrobiales	AKYG1722	AKYG1722_ge
Otu000819	Bacteria	Proteobacteria	Gammaproteobacteria	Burkholderiales	TRA3-20	TRA3-20_ge
Otu000820	Bacteria	Actinobacteriota	Actinobacteria	Propionibacteriales	Nocardioidaceae	Nocardioides
Otu000821	Bacteria	Firmicutes	Bacilli	Bacillales	Sporolactobacillaceae	Pullulanibacillus
Otu000822	Bacteria	Actinobacteriota	Thermoleophilia	Gaiellales	uncultured	uncultured_ge
Otu000823	Bacteria	Actinobacteriota	Acidimicrobiia	Microtrichales	Ilumatobacteraceae	uncultured
Otu000824	Bacteria	Chloroflexi	Chloroflexia	Thermomicrobiales	JG30-KF-CM45	JG30-KF-CM45_ge
Otu000826	Bacteria	Firmicutes	Clostridia	Peptostreptococcales-Tissierellales	Peptostreptococcaceae	Paraclostridium
Otu000827	Bacteria	Acidobacteriota	Vicinamibacteria	Vicinamibacterales	uncultured	uncultured_ge
Otu000828	Bacteria	Chloroflexi	Chloroflexia	Thermomicrobiales	AKYG1722	AKYG1722_ge
Otu000829	Bacteria	Actinobacteriota	Acidimicrobiia	Microtrichales	Ilumatobacteraceae	uncultured
Otu000830	Bacteria	Acidobacteriota	Acidobacteriae	Bryobacterales	Bryobacteraceae	Bryobacter
Otu000831	Bacteria	Proteobacteria	Alphaproteobacteria	Micropepsales	Micropepsaceae	uncultured
Otu000832	Bacteria	Proteobacteria	Gammaproteobacteria	Xanthomonadales	Rhodanobacteraceae	Dyella
Otu000833	Bacteria	Firmicutes	Bacilli	Paenibacillales	Paenibacillaceae	Cohnella
Otu000834	Bacteria	Proteobacteria	Alphaproteobacteria	Rhodobacterales	Rhodobacteraceae	Rhodobacteraceae_unclassified
Otu000836	Bacteria	Methylomirabilota	Methylomirabilia	Rokubacteriales	Rokubacteriales_fa	Rokubacteriales_ge
Otu000837	Bacteria	Actinobacteriota	Thermoleophilia	Solirubrobacterales	Solirubrobacteraceae	Conexibacter
Otu000838	Bacteria	Actinobacteriota	Acidimicrobiia	Microtrichales	Microtrichaceae	uncultured
Otu000839	Bacteria	Actinobacteriota	Acidimicrobiia	Microtrichales	Microtrichales_unclassified	Microtrichales_unclassified
Otu000840	Bacteria	Acidobacteriota	Vicinamibacteria	Vicinamibacterales	uncultured	uncultured_ge
Otu000841	Bacteria	Methylomirabilota	Methylomirabilia	Rokubacteriales	Rokubacteriales_fa	Rokubacteriales_ge
Otu000842	Bacteria	Actinobacteriota	Thermoleophilia	Gaiellales	uncultured	uncultured_ge
Otu000843	Bacteria	Chloroflexi	Ktedonobacteria	B12-WMSP1	B12-WMSP1_fa	B12-WMSP1_ge
Otu000844	Bacteria	Proteobacteria	Gammaproteobacteria	Burkholderiales	SC-I-84	SC-I-84_ge
Otu000845	Bacteria	Actinobacteriota	Acidimicrobiia	Microtrichales	uncultured	uncultured_ge
Otu000846	Bacteria	Proteobacteria	Gammaproteobacteria	Burkholderiales	Comamonadaceae	Comamonadaceae_unclassified
Otu000847	Bacteria	Patescibacteria	Saccharimonadia	Saccharimonadales	Saccharimonadales_fa	Saccharimonadales_ge
Otu000848	Bacteria	Actinobacteriota	Thermoleophilia	uncultured	uncultured_fa	uncultured_ge
Otu000849	Bacteria	Chloroflexi	KD4-96	KD4-96_or	KD4-96_fa	KD4-96_ge
Otu000850	Bacteria	Acidobacteriota	Thermoanaerobaculia	Thermoanaerobaculales	Thermoanaerobaculaceae	Subgroup_10
Otu000851	Bacteria	Proteobacteria	Gammaproteobacteria	Steroidobacterales	Steroidobacteraceae	uncultured
Otu000852	Bacteria	Acidobacteriota	Vicinamibacteria	Vicinamibacterales	uncultured	uncultured_ge
Otu000853	Bacteria	Chloroflexi	Chloroflexia	Thermomicrobiales	AKYG1722	AKYG1722_ge
Otu000854	Bacteria	Proteobacteria	Alphaproteobacteria	Caulobacterales	Caulobacteraceae	uncultured
Otu000855	Bacteria	Proteobacteria	Alphaproteobacteria	Sphingomonadales	Sphingomonadaceae	Porphyrobacter
Otu000856	Bacteria	Acidobacteriota	Blastocatellia	Pyrinomonadales	Pyrinomonadaceae	RB41
Otu000857	Bacteria	Actinobacteriota	Thermoleophilia	Solirubrobacterales	Solirubrobacteraceae	Conexibacter
Otu000858	Bacteria	Proteobacteria	Alphaproteobacteria	Rhizobiales	Rhizobiaceae	Aminobacter
Otu000859	Bacteria	Nitrospirota	Nitrospiria	Nitrospirales	Nitrospiraceae	Nitrospira
Otu000860	Bacteria	RCP2-54	RCP2-54_cl	RCP2-54_or	RCP2-54_fa	RCP2-54_ge
Otu000861	Bacteria	Proteobacteria	Alphaproteobacteria	Acetobacterales	Acetobacteraceae	Acetobacteraceae_unclassified
Otu000862	Bacteria	Chloroflexi	Chloroflexia	Thermomicrobiales	JG30-KF-CM45	JG30-KF-CM45_ge
Otu000863	Bacteria	Bacteroidota	Bacteroidia	Chitinophagales	Chitinophagaceae	Terrimonas
Otu000864	Bacteria	Proteobacteria	Gammaproteobacteria	Burkholderiales	Nitrosomonadaceae	mle1-7
Otu000865	Bacteria	Actinobacteriota	Acidimicrobiia	Microtrichales	Ilumatobacteraceae	uncultured
Otu000866	Bacteria	Bacteroidota	Bacteroidia	Cytophagales	Hymenobacteraceae	Adhaeribacter
Otu000867	Bacteria	Actinobacteriota	Actinobacteria	Pseudonocardiales	Pseudonocardiaceae	Pseudonocardia
Otu000868	Bacteria	Firmicutes	Bacilli	Bacillales	Bacillaceae	Terribacillus
Otu000869	Bacteria	Bacteroidota	Bacteroidia	Chitinophagales	Chitinophagaceae	uncultured
Otu000870	Bacteria	Acidobacteriota	Blastocatellia	Blastocatellales	Blastocatellaceae	Tellurimicrobium
Otu000871	Bacteria	Actinobacteriota	Acidimicrobiia	Microtrichales	uncultured	uncultured_ge
Otu000872	Bacteria	Actinobacteriota	Actinobacteria	Frankiales	Sporichthyaceae	Sporichthyaceae_unclassified
Otu000873	Bacteria	Chloroflexi	Ktedonobacteria	Ktedonobacterales	Ktedonobacteraceae	1959-1
Otu000874	Bacteria	Actinobacteriota	Acidimicrobiia	Microtrichales	Microtrichales_unclassified	Microtrichales_unclassified
Otu000875	Bacteria	Proteobacteria	Gammaproteobacteria	Burkholderiales	Burkholderiaceae	Burkholderia-Caballeronia-Paraburkholderia
Otu000876	Bacteria	Proteobacteria	Alphaproteobacteria	Elsterales	URHD0088	URHD0088_ge
Otu000877	Bacteria	Proteobacteria	Alphaproteobacteria	Sphingomonadales	Sphingomonadaceae	Sphingomonas
Otu000878	Bacteria	Proteobacteria	Alphaproteobacteria	Sphingomonadales	Sphingomonadaceae	Sphingomonas
Otu000879	Bacteria	Acidobacteriota	Vicinamibacteria	Vicinamibacterales	uncultured	uncultured_ge
Otu000880	Bacteria	Firmicutes	Bacilli	Paenibacillales	Paenibacillaceae	Paenibacillus
Otu000881	Bacteria	Chloroflexi	Ktedonobacteria	Ktedonobacterales	Ktedonobacteraceae	1921-2
Otu000882	Bacteria	Actinobacteriota	Actinobacteria	Corynebacteriales	Nocardiaceae	Rhodococcus
Otu000883	Bacteria	Myxococcota	Polyangia	Polyangiales	BIrii41	BIrii41_ge
Otu000884	Bacteria	Acidobacteriota	Blastocatellia	Pyrinomonadales	Pyrinomonadaceae	RB41
Otu000885	Bacteria	Actinobacteriota	Actinobacteria	Micrococcales	Demequinaceae	Demequinaceae_unclassified
Otu000886	Bacteria	Acidobacteriota	Thermoanaerobaculia	Thermoanaerobaculales	Thermoanaerobaculaceae	Subgroup_10
Otu000887	Bacteria	Acidobacteriota	Vicinamibacteria	Vicinamibacterales	uncultured	uncultured_ge
Otu000888	Bacteria	Bacteroidota	Bacteroidia	Chitinophagales	Chitinophagaceae	Ferruginibacter
Otu000889	Bacteria	Actinobacteriota	Actinobacteria	Pseudonocardiales	Pseudonocardiaceae	Pseudonocardia
Otu000890	Bacteria	Actinobacteriota	Actinobacteria	Frankiales	Frankiaceae	Frankia
Otu000891	Bacteria	Acidobacteriota	Vicinamibacteria	Vicinamibacterales	uncultured	uncultured_ge
Otu000892	Bacteria	Proteobacteria	Gammaproteobacteria	Xanthomonadales	Rhodanobacteraceae	Rhodanobacter
Otu000893	Bacteria	Proteobacteria	Gammaproteobacteria	Enterobacterales	Enterobacteriaceae	Kosakonia
Otu000894	Bacteria	Proteobacteria	Gammaproteobacteria	Burkholderiales	Oxalobacteraceae	Noviherbaspirillum
Otu000895	Bacteria	Proteobacteria	Gammaproteobacteria	Burkholderiales	Burkholderiales_unclassified	Burkholderiales_unclassified
Otu000896	Bacteria	Actinobacteriota	Actinobacteria	Frankiales	Geodermatophilaceae	Modestobacter
Otu000897	Bacteria	Actinobacteriota	Thermoleophilia	Solirubrobacterales	67-14	67-14_ge
Otu000898	Bacteria	Chloroflexi	KD4-96	KD4-96_or	KD4-96_fa	KD4-96_ge
Otu000900	Bacteria	Chloroflexi	Ktedonobacteria	Ktedonobacterales	JG30-KF-AS9	JG30-KF-AS9_ge
Otu000901	Bacteria	Chloroflexi	Ktedonobacteria	B10-SB3A	B10-SB3A_fa	B10-SB3A_ge
Otu000902	Bacteria	Proteobacteria	Alphaproteobacteria	Rhizobiales	Beijerinckiaceae	Roseiarcus
Otu000903	Bacteria	Proteobacteria	Gammaproteobacteria	Xanthomonadales	Rhodanobacteraceae	Mizugakiibacter
Otu000904	Bacteria	Myxococcota	Polyangia	Polyangiales	BIrii41	BIrii41_ge
Otu000905	Bacteria	Proteobacteria	Gammaproteobacteria	Burkholderiales	Comamonadaceae	Variovorax
Otu000906	Bacteria	Actinobacteriota	Actinobacteria	Propionibacteriales	Nocardioidaceae	Nocardioides
Otu000907	Bacteria	Gemmatimonadota	Gemmatimonadetes	Gemmatimonadales	Gemmatimonadaceae	uncultured
Otu000908	Bacteria	Actinobacteriota	Actinobacteria	Pseudonocardiales	Pseudonocardiaceae	Pseudonocardia
Otu000909	Bacteria	Proteobacteria	Alphaproteobacteria	Elsterales	uncultured	uncultured_ge
Otu000910	Bacteria	Actinobacteriota	Actinobacteria	Micrococcales	Intrasporangiaceae	Lapillicoccus
Otu000911	Bacteria	Actinobacteriota	Acidimicrobiia	Microtrichales	uncultured	uncultured_ge
Otu000912	Bacteria	Actinobacteriota	Actinobacteria	Micrococcales	Intrasporangiaceae	Oryzihumus
Otu000913	Bacteria	Firmicutes	Bacilli	Bacillales	Planococcaceae	Sporosarcina
Otu000914	Bacteria	Proteobacteria	Alphaproteobacteria	Caulobacterales	Caulobacteraceae	uncultured
Otu000915	Bacteria	Actinobacteriota	Actinobacteria	Catenulisporales	Actinospicaceae	Actinospica
Otu000916	Bacteria	Chloroflexi	Ktedonobacteria	Ktedonobacterales	JG30-KF-AS9	JG30-KF-AS9_ge
Otu000917	Bacteria	Chloroflexi	Gitt-GS-136	Gitt-GS-136_or	Gitt-GS-136_fa	Gitt-GS-136_ge
Otu000918	Bacteria	Actinobacteriota	Actinobacteria	Micromonosporales	Micromonosporaceae	Micromonosporaceae_ge
Otu000919	Bacteria	Proteobacteria	Alphaproteobacteria	Acetobacterales	Acetobacteraceae	Acetobacteraceae_unclassified
Otu000920	Bacteria	Actinobacteriota	Thermoleophilia	Thermoleophilia_unclassified	Thermoleophilia_unclassified	Thermoleophilia_unclassified
Otu000921	Bacteria	Acidobacteriota	Vicinamibacteria	Vicinamibacterales	Vicinamibacteraceae	Vicinamibacteraceae_ge
Otu000922	Bacteria	Gemmatimonadota	Gemmatimonadetes	Gemmatimonadales	Gemmatimonadaceae	Gemmatimonadaceae_unclassified
Otu000923	Bacteria	Bacteroidota	Bacteroidia	Chitinophagales	Chitinophagaceae	Flavisolibacter
Otu000924	Bacteria	Firmicutes	Clostridia	Clostridiales	Clostridiaceae	Clostridium_sensu_stricto_12
Otu000925	Bacteria	Methylomirabilota	Methylomirabilia	Rokubacteriales	Rokubacteriales_fa	Rokubacteriales_ge
Otu000926	Bacteria	Firmicutes	Bacilli	Bacillales	Bacillaceae	Bacillus
Otu000927	Bacteria	Acidobacteriota	Acidobacteriae	Acidobacteriales	Koribacteraceae	Candidatus_Koribacter
Otu000928	Bacteria	Proteobacteria	Alphaproteobacteria	Rhizobiales	Rhizobiaceae	Rhizobiaceae_unclassified
Otu000929	Bacteria	Proteobacteria	Gammaproteobacteria	Burkholderiales	Oxalobacteraceae	Duganella
Otu000930	Bacteria	Bacteroidota	Bacteroidia	Chitinophagales	Chitinophagaceae	Flavisolibacter
Otu000931	Bacteria	Actinobacteriota	Acidimicrobiia	Acidimicrobiia_unclassified	Acidimicrobiia_unclassified	Acidimicrobiia_unclassified
Otu000932	Bacteria	Proteobacteria	Gammaproteobacteria	Burkholderiales	A21b	A21b_ge
Otu000933	Bacteria	Acidobacteriota	Acidobacteriae	Subgroup_2	Subgroup_2_fa	Subgroup_2_ge
Otu000934	Bacteria	Armatimonadota	Chthonomonadetes	Chthonomonadales	Chthonomonadaceae	Chthonomonas
Otu000935	Bacteria	Chloroflexi	Dehalococcoidia	S085	S085_fa	S085_ge
Otu000936	Bacteria	Proteobacteria	Alphaproteobacteria	Tistrellales	Geminicoccaceae	Candidatus_Alysiosphaera
Otu000937	Bacteria	Actinobacteriota	Actinobacteria	Micromonosporales	Micromonosporaceae	Micromonosporaceae_unclassified
Otu000938	Bacteria	Actinobacteriota	Actinobacteria	Micrococcales	Microbacteriaceae	Microbacteriaceae_unclassified
Otu000939	Bacteria	Firmicutes	Bacilli	Paenibacillales	Paenibacillaceae	Paenibacillus
Otu000940	Bacteria	Firmicutes	Bacilli	Bacillales	Bacillaceae	uncultured
Otu000941	Bacteria	Acidobacteriota	Blastocatellia	Blastocatellales	Blastocatellaceae	Stenotrophobacter
Otu000942	Bacteria	Chloroflexi	Ktedonobacteria	Ktedonobacterales	JG30-KF-AS9	JG30-KF-AS9_ge
Otu000943	Bacteria	Chloroflexi	Ktedonobacteria	Ktedonobacterales	Ktedonobacteraceae	FCPS473
Otu000944	Bacteria	Proteobacteria	Alphaproteobacteria	Rhizobiales	Hyphomicrobiaceae	Pedomicrobium
Otu000945	Bacteria	Proteobacteria	Alphaproteobacteria	Rhizobiales	Beijerinckiaceae	Methylobacterium-Methylorubrum
Otu000946	Bacteria	Proteobacteria	Alphaproteobacteria	Acetobacterales	Acetobacteraceae	Acidiphilium
Otu000947	Bacteria	Actinobacteriota	Actinobacteria	Corynebacteriales	Nocardiaceae	Nocardia
Otu000948	Bacteria	Actinobacteriota	Acidimicrobiia	Acidimicrobiia_unclassified	Acidimicrobiia_unclassified	Acidimicrobiia_unclassified
Otu000949	Bacteria	Acidobacteriota	Acidobacteriae	Acidobacteriales	Acidobacteriales_unclassified	Acidobacteriales_unclassified
Otu000950	Bacteria	Proteobacteria	Gammaproteobacteria	Gammaproteobacteria_Incertae_Sedis	Unknown_Family	Acidibacter
Otu000951	Bacteria	Chloroflexi	Chloroflexia	Chloroflexales	Roseiflexaceae	uncultured
Otu000952	Bacteria	Actinobacteriota	Thermoleophilia	Solirubrobacterales	67-14	67-14_ge
Otu000953	Bacteria	Firmicutes	Clostridia	Peptostreptococcales-Tissierellales	Peptostreptococcaceae	Romboutsia
Otu000954	Bacteria	Proteobacteria	Alphaproteobacteria	Acetobacterales	Acetobacteraceae	Acetobacteraceae_unclassified
Otu000955	Bacteria	MBNT15	MBNT15_cl	MBNT15_or	MBNT15_fa	MBNT15_ge
Otu000956	Bacteria	Actinobacteriota	Thermoleophilia	Gaiellales	Gaiellales_unclassified	Gaiellales_unclassified
Otu000957	Bacteria	Acidobacteriota	Subgroup_11	Subgroup_11_or	Subgroup_11_fa	Subgroup_11_ge
Otu000958	Bacteria	Actinobacteriota	Acidimicrobiia	Microtrichales	Microtrichaceae	uncultured
Otu000959	Bacteria	Proteobacteria	Alphaproteobacteria	Rhizobiales	Xanthobacteraceae	Rhodoplanes
Otu000960	Bacteria	Chloroflexi	Ktedonobacteria	Ktedonobacterales	Ktedonobacteraceae	Ktedonobacter
Otu000961	Bacteria	Proteobacteria	Alphaproteobacteria	Rhizobiales	Beijerinckiaceae	Beijerinckiaceae_unclassified
Otu000962	Bacteria	Chloroflexi	Chloroflexia	Thermomicrobiales	JG30-KF-CM45	JG30-KF-CM45_ge
Otu000963	Bacteria	Chloroflexi	Chloroflexia	Thermomicrobiales	AKYG1722	AKYG1722_ge
Otu000964	Bacteria	Verrucomicrobiota	Verrucomicrobiae	Chthoniobacterales	Chthoniobacteraceae	Candidatus_Udaeobacter
Otu000965	Bacteria	Acidobacteriota	Holophagae	Subgroup_7	Subgroup_7_fa	Subgroup_7_ge
Otu000966	Bacteria	Acidobacteriota	Acidobacteriae	Acidobacteriales	Acidobacteriaceae_	Edaphobacter
Otu000967	Bacteria	Gemmatimonadota	S0134_terrestrial_group	S0134_terrestrial_group_or	S0134_terrestrial_group_fa	S0134_terrestrial_group_ge
Otu000968	Bacteria	Patescibacteria	Saccharimonadia	Saccharimonadales	WWH38	WWH38_ge
Otu000969	Bacteria	Bacteroidota	Bacteroidia	Chitinophagales	Chitinophagaceae	Terrimonas
Otu000970	Bacteria	Bacteroidota	Bacteroidia	Chitinophagales	Chitinophagaceae	Puia
Otu000971	Bacteria	Proteobacteria	Gammaproteobacteria	Burkholderiales	TRA3-20	TRA3-20_ge
Otu000972	Bacteria	Proteobacteria	Alphaproteobacteria	Micropepsales	Micropepsaceae	Micropepsaceae_unclassified
Otu000973	Bacteria	Myxococcota	Polyangia	Polyangiales	BIrii41	BIrii41_ge
Otu000974	Bacteria	Actinobacteriota	Thermoleophilia	Solirubrobacterales	Solirubrobacteraceae	Conexibacter
Otu000975	Bacteria	Chloroflexi	Chloroflexia	Chloroflexales	Roseiflexaceae	uncultured
Otu000976	Bacteria	Proteobacteria	Alphaproteobacteria	Rhizobiales	Rhizobiales_Incertae_Sedis	Alsobacter
Otu000977	Bacteria	Actinobacteriota	Acidimicrobiia	IMCC26256	IMCC26256_fa	IMCC26256_ge
Otu000978	Bacteria	Actinobacteriota	Thermoleophilia	Gaiellales	Gaiellales_unclassified	Gaiellales_unclassified
Otu000979	Bacteria	Proteobacteria	Gammaproteobacteria	R7C24	R7C24_fa	R7C24_ge
Otu000980	Bacteria	Bacteria_unclassified	Bacteria_unclassified	Bacteria_unclassified	Bacteria_unclassified	Bacteria_unclassified
Otu000981	Bacteria	Myxococcota	Polyangia	Haliangiales	Haliangiaceae	Haliangium
Otu000982	Bacteria	Actinobacteriota	Actinobacteria	Propionibacteriales	Nocardioidaceae	Nocardioides
Otu000983	Bacteria	Chloroflexi	Ktedonobacteria	Ktedonobacteria_unclassified	Ktedonobacteria_unclassified	Ktedonobacteria_unclassified
Otu000984	Bacteria	Proteobacteria	Alphaproteobacteria	Caulobacterales	Hyphomonadaceae	Hirschia
Otu000985	Bacteria	Acidobacteriota	Thermoanaerobaculia	Thermoanaerobaculales	Thermoanaerobaculaceae	Subgroup_10
Otu000986	Bacteria	Actinobacteriota	Actinobacteria	Corynebacteriales	Nocardiaceae	Nocardiaceae_unclassified
Otu000987	Bacteria	Actinobacteriota	Actinobacteria	Corynebacteriales	Nocardiaceae	Williamsia
Otu000988	Bacteria	Chloroflexi	Chloroflexia	Chloroflexales	Roseiflexaceae	uncultured
Otu000989	Bacteria	Actinobacteriota	Actinobacteria	Corynebacteriales	Nocardiaceae	Rhodococcus
Otu000990	Bacteria	Chloroflexi	AD3	AD3_or	AD3_fa	AD3_ge
Otu000991	Bacteria	Acidobacteriota	Vicinamibacteria	Vicinamibacterales	uncultured	uncultured_ge
Otu000992	Bacteria	Proteobacteria	Alphaproteobacteria	Acetobacterales	Acetobacteraceae	Acetobacteraceae_unclassified
Otu000993	Bacteria	Chloroflexi	Ktedonobacteria	C0119	C0119_fa	C0119_ge
Otu000994	Bacteria	Proteobacteria	Alphaproteobacteria	Sphingomonadales	Sphingomonadaceae	Novosphingobium
Otu000995	Bacteria	Firmicutes	Bacilli	Bacillales	Bacillaceae	Bacillaceae_unclassified
Otu000996	Bacteria	Myxococcota	Polyangia	Polyangiales	Polyangiaceae	Polyangiaceae_unclassified
Otu000997	Bacteria	Actinobacteriota	Acidimicrobiia	IMCC26256	IMCC26256_fa	IMCC26256_ge
Otu000998	Bacteria	Acidobacteriota	Acidobacteriae	Acidobacteriales	Acidobacteriaceae_	uncultured
Otu000999	Bacteria	Chloroflexi	Chloroflexia	Thermomicrobiales	JG30-KF-CM45	JG30-KF-CM45_ge
Otu001000	Bacteria	Proteobacteria	Alphaproteobacteria	Elsterales	Elsterales_unclassified	Elsterales_unclassified
Otu001001	Bacteria	Proteobacteria	Gammaproteobacteria	Burkholderiales	SC-I-84	SC-I-84_ge
Otu001002	Bacteria	Actinobacteriota	Thermoleophilia	Solirubrobacterales	67-14	67-14_ge
Otu001003	Bacteria	Actinobacteriota	Thermoleophilia	Solirubrobacterales	Solirubrobacteraceae	Conexibacter
Otu001004	Bacteria	Proteobacteria	Gammaproteobacteria	Burkholderiales	Comamonadaceae	Caenimonas
Otu001005	Bacteria	Actinobacteriota	Thermoleophilia	Gaiellales	uncultured	uncultured_ge
Otu001006	Bacteria	Chloroflexi	TK10	TK10_or	TK10_fa	TK10_ge
Otu001007	Bacteria	Acidobacteriota	Vicinamibacteria	Vicinamibacterales	Vicinamibacteraceae	Vicinamibacter
Otu001008	Bacteria	Proteobacteria	Alphaproteobacteria	Micropepsales	Micropepsaceae	Micropepsis
Otu001009	Bacteria	Planctomycetota	Planctomycetes	Isosphaerales	Isosphaeraceae	Isosphaeraceae_unclassified
Otu001010	Bacteria	Proteobacteria	Alphaproteobacteria	Rhizobiales	Devosiaceae	Devosia
Otu001011	Bacteria	Proteobacteria	Alphaproteobacteria	Acetobacterales	Acetobacteraceae	Acetobacteraceae_unclassified
Otu001012	Bacteria	Proteobacteria	Alphaproteobacteria	Acetobacterales	Acetobacteraceae	Acetobacteraceae_unclassified
Otu001013	Bacteria	Actinobacteriota	Actinobacteria	Micromonosporales	Micromonosporaceae	Micromonosporaceae_unclassified
Otu001014	Bacteria	Bacteroidota	Bacteroidia	Flavobacteriales	Weeksellaceae	Chryseobacterium
Otu001015	Bacteria	Chloroflexi	TK10	TK10_or	TK10_fa	TK10_ge
Otu001016	Bacteria	Patescibacteria	Saccharimonadia	Saccharimonadales	Saccharimonadaceae	TM7a
Otu001017	Bacteria	Actinobacteriota	Actinobacteria	Frankiales	Frankiales_unclassified	Frankiales_unclassified
Otu001018	Bacteria	Proteobacteria	Alphaproteobacteria	Caulobacterales	Caulobacteraceae	Phenylobacterium
Otu001019	Bacteria	Proteobacteria	Gammaproteobacteria	Burkholderiales	Comamonadaceae	Comamonadaceae_unclassified
Otu001020	Bacteria	Proteobacteria	Gammaproteobacteria	Burkholderiales	SC-I-84	SC-I-84_ge
Otu001021	Bacteria	Proteobacteria	Gammaproteobacteria	Burkholderiales	Oxalobacteraceae	Noviherbaspirillum
Otu001022	Bacteria	Actinobacteriota	Actinobacteria	Micrococcales	Microbacteriaceae	Galbitalea
Otu001023	Bacteria	Acidobacteriota	Acidobacteriae	Subgroup_2	Subgroup_2_fa	Subgroup_2_ge
Otu001024	Bacteria	Gemmatimonadota	Longimicrobia	Longimicrobiales	Longimicrobiaceae	YC-ZSS-LKJ147
Otu001025	Bacteria	Proteobacteria	Gammaproteobacteria	Burkholderiales	SC-I-84	SC-I-84_ge
Otu001026	Bacteria	Acidobacteriota	Acidobacteriae	Subgroup_2	Subgroup_2_fa	Subgroup_2_ge
Otu001027	Bacteria	Firmicutes	Bacilli	Thermoactinomycetales	Thermoactinomycetaceae	Shimazuella
Otu001028	Bacteria	Bacteroidota	Bacteroidia	Chitinophagales	Chitinophagaceae	Chitinophagaceae_unclassified
Otu001029	Bacteria	Proteobacteria	Alphaproteobacteria	Elsterales	uncultured	uncultured_ge
Otu001030	Bacteria	Actinobacteriota	Thermoleophilia	Thermoleophilia_unclassified	Thermoleophilia_unclassified	Thermoleophilia_unclassified
Otu001031	Bacteria	Actinobacteriota	Actinobacteria	Propionibacteriales	Nocardioidaceae	Nocardioides
Otu001032	Bacteria	Patescibacteria	Saccharimonadia	Saccharimonadales	Saccharimonadaceae	TM7a
Otu001033	Bacteria	Acidobacteriota	Acidobacteriae	Solibacterales	Solibacteraceae	Candidatus_Solibacter
Otu001034	Bacteria	Actinobacteriota	Acidimicrobiia	Microtrichales	uncultured	uncultured_ge
Otu001035	Bacteria	Chloroflexi	Ktedonobacteria	Ktedonobacterales	Ktedonobacteraceae	uncultured
Otu001036	Bacteria	Acidobacteriota	Blastocatellia	Blastocatellales	Blastocatellaceae	Aridibacter
Otu001037	Bacteria	Firmicutes	Bacilli	Bacillales	Planococcaceae	uncultured
Otu001038	Bacteria	Chloroflexi	Ktedonobacteria	Ktedonobacterales	JG30-KF-AS9	JG30-KF-AS9_ge
Otu001039	Bacteria	Proteobacteria	Gammaproteobacteria	Burkholderiales	Oxalobacteraceae	Oxalobacteraceae_unclassified
Otu001040	Bacteria	Actinobacteriota	Acidimicrobiia	Acidimicrobiia_unclassified	Acidimicrobiia_unclassified	Acidimicrobiia_unclassified
Otu001041	Bacteria	Actinobacteriota	Thermoleophilia	Solirubrobacterales	67-14	67-14_ge
Otu001042	Bacteria	Acidobacteriota	Vicinamibacteria	Vicinamibacterales	Vicinamibacterales_unclassified	Vicinamibacterales_unclassified
Otu001043	Bacteria	Actinobacteriota	Thermoleophilia	Solirubrobacterales	Solirubrobacterales_unclassified	Solirubrobacterales_unclassified
Otu001044	Bacteria	Actinobacteriota	Actinobacteria	Frankiales	Sporichthyaceae	Sporichthya
Otu001045	Bacteria	Proteobacteria	Alphaproteobacteria	Alphaproteobacteria_unclassified	Alphaproteobacteria_unclassified	Alphaproteobacteria_unclassified
Otu001046	Bacteria	Actinobacteriota	Acidimicrobiia	uncultured	uncultured_fa	uncultured_ge
Otu001047	Bacteria	Firmicutes	Bacilli	Bacillales	Planococcaceae	Lysinibacillus
Otu001048	Bacteria	Actinobacteriota	Acidimicrobiia	IMCC26256	IMCC26256_fa	IMCC26256_ge
Otu001049	Bacteria	Acidobacteriota	Blastocatellia	Pyrinomonadales	Pyrinomonadaceae	RB41
Otu001050	Bacteria	Proteobacteria	Gammaproteobacteria	Xanthomonadales	Xanthomonadaceae	Xanthomonadaceae_unclassified
Otu001051	Bacteria	Proteobacteria	Alphaproteobacteria	uncultured	uncultured_fa	uncultured_ge
Otu001052	Bacteria	Proteobacteria	Alphaproteobacteria	Rhizobiales	Xanthobacteraceae	Xanthobacteraceae_ge
Otu001053	Bacteria	Nitrospirota	Nitrospiria	Nitrospirales	Nitrospiraceae	Nitrospira
Otu001054	Bacteria	Chloroflexi	Chloroflexia	Chloroflexales	Roseiflexaceae	uncultured
Otu001055	Bacteria	Proteobacteria	Alphaproteobacteria	Elsterales	uncultured	uncultured_ge
Otu001056	Bacteria	Actinobacteriota	Thermoleophilia	Solirubrobacterales	67-14	67-14_ge
Otu001057	Bacteria	Proteobacteria	Alphaproteobacteria	Rhodobacterales	Rhodobacteraceae	Rubellimicrobium
Otu001058	Bacteria	Proteobacteria	Gammaproteobacteria	Burkholderiales	Burkholderiaceae	Cupriavidus
Otu001059	Bacteria	Actinobacteriota	Actinobacteria	Propionibacteriales	Nocardioidaceae	Nocardioides
Otu001060	Bacteria	Actinobacteriota	Actinobacteria	Frankiales	Acidothermaceae	Acidothermus
Otu001061	Bacteria	Acidobacteriota	Vicinamibacteria	Vicinamibacterales	Vicinamibacteraceae	Vicinamibacteraceae_ge
Otu001062	Bacteria	Proteobacteria	Gammaproteobacteria	Xanthomonadales	Rhodanobacteraceae	Rhodanobacteraceae_unclassified
Otu001063	Bacteria	Acidobacteriota	Vicinamibacteria	Vicinamibacterales	Vicinamibacteraceae	Vicinamibacteraceae_ge
Otu001064	Bacteria	Actinobacteriota	Thermoleophilia	Gaiellales	uncultured	uncultured_ge
Otu001065	Bacteria	Chloroflexi	Chloroflexi_unclassified	Chloroflexi_unclassified	Chloroflexi_unclassified	Chloroflexi_unclassified
Otu001066	Bacteria	Actinobacteriota	Actinobacteria	Propionibacteriales	Nocardioidaceae	Nocardioides
Otu001067	Bacteria	Actinobacteriota	Thermoleophilia	Gaiellales	Gaiellales_unclassified	Gaiellales_unclassified
Otu001068	Bacteria	Gemmatimonadota	Gemmatimonadetes	Gemmatimonadales	Gemmatimonadaceae	Gemmatimonadaceae_unclassified
Otu001069	Bacteria	Chloroflexi	SHA-26	SHA-26_or	SHA-26_fa	SHA-26_ge
Otu001070	Bacteria	Proteobacteria	Gammaproteobacteria	Burkholderiales	SC-I-84	SC-I-84_ge	100)
Otu001071	Bacteria	Acidobacteriota	Acidobacteriae	Acidobacteriales	Acidobacteriaceae_	Acidobacteriaceae_
Otu001072	Bacteria	Proteobacteria	Gammaproteobacteria	Burkholderiales	Comamonadaceae	Rhizobacter
Otu001073	Bacteria	Myxococcota	Polyangia	Polyangiales	Sandaracinaceae	uncultured
Otu001074	Bacteria	Actinobacteriota	Actinobacteria	Frankiales	Geodermatophilaceae	Geodermatophilaceae_unclassified
Otu001075	Bacteria	Proteobacteria	Gammaproteobacteria	Burkholderiales	Nitrosomonadaceae	Ellin6067
Otu001076	Bacteria	Acidobacteriota	Acidobacteriae	Solibacterales	Solibacteraceae	Candidatus_Solibacter
Otu001077	Bacteria	Proteobacteria	Alphaproteobacteria	Dongiales	Dongiaceae	Dongia
Otu001078	Bacteria	Chloroflexi	Ktedonobacteria	C0119	C0119_fa	C0119_ge
Otu001079	Bacteria	Bacteria_unclassified	Bacteria_unclassified	Bacteria_unclassified	Bacteria_unclassified	Bacteria_unclassified
Otu001080	Bacteria	Actinobacteriota	Actinobacteria	Actinobacteria_unclassified	Actinobacteria_unclassified	Actinobacteria_unclassified
Otu001081	Bacteria	Planctomycetota	Planctomycetes	Isosphaerales	Isosphaeraceae	Aquisphaera
Otu001082	Bacteria	Proteobacteria	Gammaproteobacteria	Burkholderiales	Oxalobacteraceae	Massilia
Otu001083	Bacteria	Acidobacteriota	Acidobacteriae	Bryobacterales	Bryobacteraceae	Bryobacter
Otu001084	Bacteria	Proteobacteria	Gammaproteobacteria	Burkholderiales	Oxalobacteraceae	Massilia
Otu001085	Bacteria	Chloroflexi	JG30-KF-CM66	JG30-KF-CM66_or	JG30-KF-CM66_fa	JG30-KF-CM66_ge
Otu001086	Bacteria	Actinobacteriota	Actinobacteria	Streptomycetales	Streptomycetaceae	Streptacidiphilus
Otu001087	Bacteria	Chloroflexi	Chloroflexia	Thermomicrobiales	JG30-KF-CM45	JG30-KF-CM45_ge
Otu001088	Bacteria	Proteobacteria	Gammaproteobacteria	Burkholderiales	Oxalobacteraceae	Oxalobacteraceae_unclassified
Otu001089	Bacteria	Proteobacteria	Alphaproteobacteria	uncultured	uncultured_fa	uncultured_ge
Otu001090	Bacteria	Actinobacteriota	Actinobacteria	Micrococcales	Microbacteriaceae	Humibacter
Otu001091	Bacteria	Acidobacteriota	Vicinamibacteria	Vicinamibacterales	uncultured	uncultured_ge
Otu001092	Bacteria	Chloroflexi	Chloroflexia	Thermomicrobiales	JG30-KF-CM45	JG30-KF-CM45_ge
Otu001093	Bacteria	Chloroflexi	Chloroflexia	Chloroflexales	Roseiflexaceae	uncultured
Otu001094	Bacteria	Firmicutes	Bacilli	Bacillales	Bacillaceae	Bacillus
Otu001095	Bacteria	Chloroflexi	Gitt-GS-136	Gitt-GS-136_or	Gitt-GS-136_fa	Gitt-GS-136_ge
Otu001096	Bacteria	Firmicutes	Bacilli	Paenibacillales	Paenibacillaceae	Paenibacillus
Otu001097	Bacteria	Acidobacteriota	Blastocatellia	Pyrinomonadales	Pyrinomonadaceae	RB41
Otu001098	Bacteria	Chloroflexi	Chloroflexia	Thermomicrobiales	JG30-KF-CM45	JG30-KF-CM45_ge
Otu001099	Bacteria	Myxococcota	Polyangia	Haliangiales	Haliangiaceae	Haliangium
Otu001100	Bacteria	Verrucomicrobiota	Verrucomicrobiae	Chthoniobacterales	Chthoniobacteraceae	Candidatus_Udaeobacter
Otu001101	Bacteria	Chloroflexi	Chloroflexia	Chloroflexales	Roseiflexaceae	uncultured
Otu001102	Bacteria	Actinobacteriota	Acidimicrobiia	Microtrichales	Microtrichales_unclassified	Microtrichales_unclassified
Otu001103	Bacteria	Acidobacteriota	Vicinamibacteria	Subgroup_17	Subgroup_17_fa	Subgroup_17_ge
Otu001104	Bacteria	Chloroflexi	Ktedonobacteria	Ktedonobacterales	Ktedonobacteraceae	Ktedonobacteraceae_unclassified
Otu001105	Bacteria	Proteobacteria	Gammaproteobacteria	Xanthomonadales	Rhodanobacteraceae	Rhodanobacteraceae_unclassified
Otu001106	Bacteria	Actinobacteriota	Thermoleophilia	Gaiellales	Gaiellales_unclassified	Gaiellales_unclassified
Otu001107	Bacteria	Firmicutes	Bacilli	Bacillales	Bacillales_unclassified	Bacillales_unclassified
Otu001108	Bacteria	Gemmatimonadota	Gemmatimonadetes	Gemmatimonadales	Gemmatimonadaceae	uncultured
Otu001109	Bacteria	Proteobacteria	Gammaproteobacteria	R7C24	R7C24_fa	R7C24_ge
Otu001110	Bacteria	Bdellovibrionota	Oligoflexia	0319-6G20	0319-6G20_fa	0319-6G20_ge
Otu001111	Bacteria	Myxococcota	Polyangia	Polyangiales	BIrii41	BIrii41_ge
Otu001112	Bacteria	Proteobacteria	Alphaproteobacteria	Caulobacterales	Caulobacteraceae	Phenylobacterium
Otu001113	Bacteria	Actinobacteriota	Actinobacteria	PeM15	PeM15_fa	PeM15_ge
Otu001115	Bacteria	Bacteria_unclassified	Bacteria_unclassified	Bacteria_unclassified	Bacteria_unclassified	Bacteria_unclassified
Otu001116	Bacteria	Acidobacteriota	Vicinamibacteria	Vicinamibacterales	uncultured	uncultured_ge
Otu001118	Bacteria	Acidobacteriota	Blastocatellia	Blastocatellales	Blastocatellaceae	uncultured
Otu001119	Bacteria	Proteobacteria	Gammaproteobacteria	Gammaproteobacteria_Incertae_Sedis	Unknown_Family	Acidibacter
Otu001120	Bacteria	Gemmatimonadota	Gemmatimonadetes	Gemmatimonadales	Gemmatimonadaceae	uncultured
Otu001121	Bacteria	Acidobacteriota	Subgroup_5	Subgroup_5_or	Subgroup_5_fa	Subgroup_5_ge
Otu001122	Bacteria	Actinobacteriota	Actinobacteria	Micromonosporales	Micromonosporaceae	Planosporangium
Otu001123	Bacteria	Actinobacteriota	Thermoleophilia	Solirubrobacterales	67-14	67-14_ge
Otu001124	Bacteria	Chloroflexi	Chloroflexia	Kallotenuales	AKIW781	AKIW781_ge
Otu001125	Bacteria	Bacteroidota	Bacteroidia	Chitinophagales	Chitinophagaceae	Chitinophagaceae_unclassified
Otu001126	Bacteria	Actinobacteriota	Actinobacteriota_unclassified	Actinobacteriota_unclassified	Actinobacteriota_unclassified	Actinobacteriota_unclassified
Otu001127	Bacteria	Chloroflexi	Ktedonobacteria	C0119	C0119_fa	C0119_ge
Otu001128	Bacteria	Firmicutes	Bacilli	Bacillales	Planococcaceae	Solibacillus
Otu001129	Bacteria	Chloroflexi	TK10	TK10_or	TK10_fa	TK10_ge
Otu001130	Bacteria	Nitrospirota	Nitrospiria	Nitrospirales	Nitrospiraceae	Nitrospira
Otu001131	Bacteria	Chloroflexi	Chloroflexia	Thermomicrobiales	JG30-KF-CM45	JG30-KF-CM45_ge
Otu001132	Bacteria	Actinobacteriota	Thermoleophilia	Solirubrobacterales	67-14	67-14_ge
Otu001133	Bacteria	Actinobacteriota	Thermoleophilia	Solirubrobacterales	Solirubrobacteraceae	Conexibacter
Otu001134	Bacteria	Chloroflexi	Chloroflexia	Chloroflexales	Roseiflexaceae	uncultured
Otu001135	Bacteria	Cyanobacteria	Cyanobacteriia	Cyanobacteriales	Nostocaceae	Nostoc_PCC-7524
Otu001136	Bacteria	Actinobacteriota	Thermoleophilia	Gaiellales	Gaiellaceae	Gaiella
Otu001137	Bacteria	Bdellovibrionota	Bdellovibrionia	Bdellovibrionales	Bdellovibrionaceae	OM27_clade
Otu001138	Bacteria	Acidobacteriota	Vicinamibacteria	Vicinamibacterales	uncultured	uncultured_ge
Otu001139	Bacteria	Chloroflexi	Chloroflexia	Thermomicrobiales	JG30-KF-CM45	JG30-KF-CM45_ge
Otu001140	Bacteria	Desulfobacterota	uncultured	uncultured_or	uncultured_fa	uncultured_ge
Otu001141	Bacteria	Actinobacteriota	Acidimicrobiia	Microtrichales	uncultured	uncultured_ge
Otu001142	Bacteria	Firmicutes	Bacilli	Alicyclobacillales	Alicyclobacillaceae	Tumebacillus
Otu001143	Bacteria	Proteobacteria	Gammaproteobacteria	Burkholderiales	Comamonadaceae	Comamonadaceae_unclassified
Otu001144	Bacteria	Actinobacteriota	Thermoleophilia	Solirubrobacterales	67-14	67-14_ge
Otu001145	Bacteria	Proteobacteria	Alphaproteobacteria	Rhizobiales	Beijerinckiaceae	Beijerinckiaceae_unclassified
Otu001146	Bacteria	Bacteroidota	Bacteroidia	Chitinophagales	Chitinophagaceae	uncultured
Otu001147	Bacteria	Actinobacteriota	Actinobacteria	Pseudonocardiales	Pseudonocardiaceae	Pseudonocardia
Otu001148	Bacteria	Proteobacteria	Gammaproteobacteria	Burkholderiales	SC-I-84	SC-I-84_ge
Otu001149	Bacteria	Proteobacteria	Alphaproteobacteria	Micropepsales	Micropepsaceae	uncultured
Otu001150	Bacteria	Patescibacteria	Saccharimonadia	Saccharimonadales	Saccharimonadales_unclassified	Saccharimonadales_unclassified
Otu001151	Bacteria	Proteobacteria	Alphaproteobacteria	Tistrellales	Geminicoccaceae	Geminicoccus
Otu001152	Bacteria	Proteobacteria	Gammaproteobacteria	Burkholderiales	Comamonadaceae	Mitsuaria
Otu001153	Bacteria	Acidobacteriota	Thermoanaerobaculia	Thermoanaerobaculales	Thermoanaerobaculaceae	Subgroup_10
Otu001154	Bacteria	Myxococcota	Polyangia	Polyangiales	Polyangiaceae	uncultured
Otu001155	Bacteria	Gemmatimonadota	Gemmatimonadetes	Gemmatimonadales	Gemmatimonadaceae	Gemmatimonadaceae_unclassified
Otu001156	Bacteria	Bacteroidota	Bacteroidia	Chitinophagales	Chitinophagaceae	Chitinophagaceae_unclassified
Otu001157	Bacteria	Actinobacteriota	Actinobacteria	Actinobacteria_unclassified	Actinobacteria_unclassified	Actinobacteria_unclassified
Otu001158	Bacteria	Proteobacteria	Alphaproteobacteria	Rhizobiales	Xanthobacteraceae	Xanthobacteraceae_unclassified
Otu001160	Bacteria	Actinobacteriota	Actinobacteria	Streptosporangiales	Thermomonosporaceae	Actinocorallia
Otu001161	Bacteria	Myxococcota	Myxococcia	Myxococcales	Anaeromyxobacteraceae	Anaeromyxobacter
Otu001162	Bacteria	Bacteroidota	Bacteroidia	Chitinophagales	Chitinophagaceae	Parafilimonas
Otu001163	Bacteria	Actinobacteriota	MB-A2-108	MB-A2-108_or	MB-A2-108_fa	MB-A2-108_ge
Otu001164	Bacteria	Actinobacteriota	Actinobacteria	Pseudonocardiales	Pseudonocardiaceae	Kutzneria
Otu001165	Bacteria	Chloroflexi	Chloroflexia	Chloroflexales	Roseiflexaceae	uncultured
Otu001166	Bacteria	Chloroflexi	Chloroflexia	Thermomicrobiales	Thermomicrobiales_unclassified	Thermomicrobiales_unclassified
Otu001167	Bacteria	Proteobacteria	Alphaproteobacteria	Elsterales	uncultured	uncultured_ge
Otu001168	Bacteria	Proteobacteria	Alphaproteobacteria	Rhizobiales	Methyloligellaceae	Methyloligellaceae_ge
Otu001169	Bacteria	Actinobacteriota	Thermoleophilia	Gaiellales	uncultured	uncultured_ge
Otu001170	Bacteria	Chloroflexi	Ktedonobacteria	Ktedonobacterales	Ktedonobacteraceae	Ktedonobacteraceae_unclassified
Otu001171	Bacteria	Actinobacteriota	MB-A2-108	MB-A2-108_or	MB-A2-108_fa	MB-A2-108_ge
Otu001172	Bacteria	Proteobacteria	Alphaproteobacteria	Rhizobiales	Beijerinckiaceae	Beijerinckiaceae_unclassified
Otu001173	Bacteria	Acidobacteriota	Thermoanaerobaculia	Thermoanaerobaculales	Thermoanaerobaculaceae	Subgroup_10
Otu001174	Bacteria	Proteobacteria	Gammaproteobacteria	Xanthomonadales	Xanthomonadaceae	Luteimonas
Otu001175	Bacteria	Chloroflexi	Chloroflexia	Kallotenuales	AKIW781	AKIW781_ge
Otu001176	Bacteria	Proteobacteria	Gammaproteobacteria	Enterobacterales	Enterobacteriaceae	Enterobacteriaceae_unclassified
Otu001177	Bacteria	Bacteroidota	Bacteroidia	Chitinophagales	Saprospiraceae	uncultured
Otu001178	Bacteria	Actinobacteriota	Actinobacteria	Micrococcales	Microbacteriaceae	Agrococcus
Otu001179	Bacteria	Proteobacteria	Gammaproteobacteria	Xanthomonadales	Rhodanobacteraceae	Rhodanobacter
Otu001180	Bacteria	Acidobacteriota	Thermoanaerobaculia	Thermoanaerobaculales	Thermoanaerobaculaceae	Subgroup_10
Otu001181	Bacteria	Gemmatimonadota	Gemmatimonadetes	Gemmatimonadales	Gemmatimonadaceae	Gemmatimonas
Otu001182	Bacteria	Proteobacteria	Alphaproteobacteria	Rhizobiales	Xanthobacteraceae	Xanthobacteraceae_unclassified
Otu001183	Bacteria	Latescibacterota	Latescibacterota_cl	Latescibacterota_or	Latescibacterota_fa	Latescibacterota_ge
Otu001184	Bacteria	Actinobacteriota	Thermoleophilia	Solirubrobacterales	Solirubrobacteraceae	Solirubrobacteraceae_unclassified	100)
Otu001185	Bacteria	Acidobacteriota	Acidobacteriae	Acidobacteriales	Acidobacteriaceae_	Acidobacteriaceae_
Otu001186	Bacteria	Chloroflexi	KD4-96	KD4-96_or	KD4-96_fa	KD4-96_ge
Otu001187	Bacteria	Acidobacteriota	Vicinamibacteria	Vicinamibacterales	Vicinamibacteraceae	Vicinamibacteraceae_ge
Otu001188	Bacteria	Proteobacteria	Alphaproteobacteria	Rhizobiales	Xanthobacteraceae	Pseudorhodoplanes
Otu001189	Bacteria	Myxococcota	Polyangia	Nannocystales	Nannocystaceae	Nannocystis
Otu001190	Bacteria	Chloroflexi	Ktedonobacteria	C0119	C0119_fa	C0119_ge
Otu001191	Bacteria	Acidobacteriota	Holophagae	Subgroup_7	Subgroup_7_fa	Subgroup_7_ge
Otu001192	Bacteria	Chloroflexi	Chloroflexia	Chloroflexales	Roseiflexaceae	uncultured
Otu001193	Bacteria	Chloroflexi	KD4-96	KD4-96_or	KD4-96_fa	KD4-96_ge
Otu001194	Bacteria	Acidobacteriota	Blastocatellia	Blastocatellales	Blastocatellaceae	uncultured
Otu001195	Bacteria	Bacteroidota	Bacteroidia	Cytophagales	Spirosomaceae	Dyadobacter
Otu001196	Bacteria	Proteobacteria	Alphaproteobacteria	Rhizobiales	Devosiaceae	Devosia
Otu001197	Bacteria	Bacteroidota	Bacteroidia	Chitinophagales	Chitinophagaceae	uncultured
Otu001198	Bacteria	Proteobacteria	Alphaproteobacteria	Sphingomonadales	Sphingomonadaceae	Sphingomonas
Otu001199	Bacteria	Firmicutes	Clostridia	Clostridiales	Clostridiaceae	Clostridium_sensu_stricto_13
Otu001200	Bacteria	Actinobacteriota	MB-A2-108	MB-A2-108_or	MB-A2-108_fa	MB-A2-108_ge
Otu001201	Bacteria	Verrucomicrobiota	Verrucomicrobiae	Chthoniobacterales	Chthoniobacteraceae	Candidatus_Udaeobacter
Otu001202	Bacteria	Acidobacteriota	Acidobacteriae	Bryobacterales	Bryobacteraceae	Bryobacter
Otu001203	Bacteria	WPS-2	WPS-2_cl	WPS-2_or	WPS-2_fa	WPS-2_ge
Otu001204	Bacteria	Proteobacteria	Alphaproteobacteria	Rhizobiales	Hyphomicrobiaceae	Hyphomicrobium
Otu001205	Bacteria	Myxococcota	Polyangia	Polyangiales	BIrii41	BIrii41_ge
Otu001206	Bacteria	Chloroflexi	JG30-KF-CM66	JG30-KF-CM66_or	JG30-KF-CM66_fa	JG30-KF-CM66_ge
Otu001207	Bacteria	Actinobacteriota	Thermoleophilia	Solirubrobacterales	67-14	67-14_ge
Otu001208	Bacteria	Acidobacteriota	Blastocatellia	Pyrinomonadales	Pyrinomonadaceae	RB41
Otu001209	Bacteria	Chloroflexi	Ktedonobacteria	Ktedonobacterales	Ktedonobacteraceae	1921-3
Otu001210	Bacteria	Chloroflexi	KD4-96	KD4-96_or	KD4-96_fa	KD4-96_ge
Otu001211	Bacteria	Verrucomicrobiota	Verrucomicrobiae	Chthoniobacterales	Chthoniobacteraceae	Candidatus_Udaeobacter
Otu001212	Bacteria	Proteobacteria	Gammaproteobacteria	Burkholderiales	Burkholderiaceae	Ralstonia
Otu001213	Bacteria	Chloroflexi	AD3	AD3_or	AD3_fa	AD3_ge
Otu001214	Bacteria	Bacteria_unclassified	Bacteria_unclassified	Bacteria_unclassified	Bacteria_unclassified	Bacteria_unclassified
Otu001215	Bacteria	Firmicutes	Bacilli	Paenibacillales	Paenibacillaceae	Paenibacillus
Otu001216	Bacteria	Proteobacteria	Alphaproteobacteria	Elsterales	uncultured	uncultured_ge
Otu001217	Bacteria	Proteobacteria	Alphaproteobacteria	Rhizobiales	Rhizobiaceae	Phyllobacterium
Otu001218	Bacteria	Proteobacteria	Alphaproteobacteria	Rhizobiales	Xanthobacteraceae	Xanthobacteraceae_unclassified
Otu001219	Bacteria	Actinobacteriota	Thermoleophilia	Gaiellales	uncultured	uncultured_ge
Otu001220	Bacteria	Proteobacteria	Gammaproteobacteria	Xanthomonadales	Rhodanobacteraceae	Rhodanobacter
Otu001221	Bacteria	Chloroflexi	Ktedonobacteria	Ktedonobacterales	Ktedonobacteraceae	uncultured
Otu001222	Bacteria	Firmicutes	Bacilli	Bacilli_unclassified	Bacilli_unclassified	Bacilli_unclassified
Otu001223	Bacteria	Actinobacteriota	Thermoleophilia	Solirubrobacterales	Solirubrobacteraceae	Solirubrobacteraceae_unclassified
Otu001224	Bacteria	Proteobacteria	Alphaproteobacteria	Sphingomonadales	Sphingomonadaceae	Sphingopyxis
Otu001225	Bacteria	Proteobacteria	Gammaproteobacteria	Gammaproteobacteria_Incertae_Sedis	Unknown_Family	Acidibacter
Otu001226	Bacteria	Chloroflexi	Chloroflexia	Chloroflexales	Roseiflexaceae	uncultured
Otu001227	Bacteria	Actinobacteriota	Thermoleophilia	Solirubrobacterales	Solirubrobacteraceae	Conexibacter
Otu001228	Bacteria	Proteobacteria	Alphaproteobacteria	uncultured	uncultured_fa	uncultured_ge
Otu001229	Bacteria	Cyanobacteria	Cyanobacteriia	Oxyphotobacteria_Incertae_Sedis	Unknown_Family	Leptolyngbya_EcFYyyy-00
Otu001230	Bacteria	Acidobacteriota	Acidobacteriae	Bryobacterales	Bryobacteraceae	Bryobacter
Otu001231	Bacteria	Gemmatimonadota	Gemmatimonadetes	Gemmatimonadales	Gemmatimonadaceae	Gemmatimonas
Otu001232	Bacteria	Proteobacteria	Alphaproteobacteria	Rhizobiales	Xanthobacteraceae	Pseudorhodoplanes
Otu001233	Bacteria	Chloroflexi	Chloroflexia	Thermomicrobiales	JG30-KF-CM45	JG30-KF-CM45_ge
Otu001234	Bacteria	Gemmatimonadota	Gemmatimonadetes	Gemmatimonadales	Gemmatimonadaceae	uncultured
Otu001235	Bacteria	Gemmatimonadota	Gemmatimonadetes	Gemmatimonadales	Gemmatimonadaceae	Gemmatimonadaceae_unclassified
Otu001236	Bacteria	Actinobacteriota	Acidimicrobiia	Microtrichales	Iamiaceae	Iamia
Otu001237	Bacteria	Bacteroidota	Bacteroidia	Sphingobacteriales	Sphingobacteriaceae	Pedobacter
Otu001238	Bacteria	Chloroflexi	Ktedonobacteria	Ktedonobacterales	Ktedonobacteraceae	FCPS473
Otu001239	Bacteria	Actinobacteriota	Actinobacteria	Propionibacteriales	Nocardioidaceae	Nocardioidaceae_unclassified
Otu001240	Bacteria	Proteobacteria	Gammaproteobacteria	Burkholderiales	SC-I-84	SC-I-84_ge
Otu001241	Bacteria	Acidobacteriota	Vicinamibacteria	Subgroup_17	Subgroup_17_fa	Subgroup_17_ge
Otu001242	Bacteria	Actinobacteriota	Acidimicrobiia	Acidimicrobiia_unclassified	Acidimicrobiia_unclassified	Acidimicrobiia_unclassified
Otu001243	Bacteria	Acidobacteriota	Vicinamibacteria	Vicinamibacterales	uncultured	uncultured_ge
Otu001244	Bacteria	Myxococcota	Myxococcia	Myxococcales	Myxococcaceae	Myxococcaceae_unclassified
Otu001245	Bacteria	Actinobacteriota	Thermoleophilia	Solirubrobacterales	67-14	67-14_ge
Otu001246	Bacteria	Myxococcota	Polyangia	Polyangiales	Polyangiaceae	Polyangiaceae_unclassified
Otu001247	Bacteria	Acidobacteriota	Acidobacteriae	Solibacterales	Solibacteraceae	Candidatus_Solibacter
Otu001248	Bacteria	Proteobacteria	Alphaproteobacteria	Rhizobiales	Xanthobacteraceae	Xanthobacteraceae_unclassified
Otu001249	Bacteria	Actinobacteriota	Thermoleophilia	Thermoleophilia_unclassified	Thermoleophilia_unclassified	Thermoleophilia_unclassified
Otu001250	Bacteria	Gemmatimonadota	Gemmatimonadetes	Gemmatimonadales	Gemmatimonadaceae	uncultured
Otu001251	Bacteria	Actinobacteriota	Thermoleophilia	Gaiellales	Gaiellales_unclassified	Gaiellales_unclassified
Otu001252	Bacteria	Bacteroidota	Bacteroidia	Chitinophagales	Chitinophagaceae	Edaphobaculum
Otu001253	Bacteria	Actinobacteriota	Thermoleophilia	Solirubrobacterales	67-14	67-14_ge
Otu001254	Bacteria	Acidobacteriota	Acidobacteriae	Bryobacterales	Bryobacteraceae	Bryobacter
Otu001255	Bacteria	Chloroflexi	KD4-96	KD4-96_or	KD4-96_fa	KD4-96_ge
Otu001256	Bacteria	Bacteroidota	Bacteroidia	Chitinophagales	Chitinophagaceae	Edaphobaculum
Otu001257	Bacteria	Acidobacteriota	Vicinamibacteria	Vicinamibacterales	uncultured	uncultured_ge
Otu001258	Bacteria	Proteobacteria	Alphaproteobacteria	Rhizobiales	Xanthobacteraceae	Xanthobacteraceae_unclassified
Otu001259	Bacteria	Verrucomicrobiota	Verrucomicrobiae	Pedosphaerales	Pedosphaeraceae	Pedosphaeraceae_ge
Otu001260	Bacteria	Proteobacteria	Alphaproteobacteria	Tistrellales	Geminicoccaceae	Candidatus_Alysiosphaera
Otu001261	Bacteria	Myxococcota	Myxococcia	Myxococcales	Myxococcaceae	uncultured
Otu001262	Bacteria	Actinobacteriota	Thermoleophilia	Gaiellales	uncultured	uncultured_ge
Otu001263	Bacteria	Proteobacteria	Alphaproteobacteria	Caulobacterales	Hyphomonadaceae	SWB02
Otu001264	Bacteria	Proteobacteria	Alphaproteobacteria	Rhizobiales	Rhizobiaceae	Aureimonas
Otu001265	Bacteria	Proteobacteria	Alphaproteobacteria	Acetobacterales	Acetobacteraceae	Acetobacteraceae_unclassified
Otu001266	Bacteria	Acidobacteriota	Vicinamibacteria	Vicinamibacterales	uncultured	uncultured_ge
Otu001267	Bacteria	Verrucomicrobiota	Verrucomicrobiae	Pedosphaerales	Pedosphaeraceae	ADurb.Bin063-1
Otu001268	Bacteria	Proteobacteria	Alphaproteobacteria	Elsterales	uncultured	uncultured_ge
Otu001269	Bacteria	Chloroflexi	TK10	TK10_or	TK10_fa	TK10_ge
Otu001270	Bacteria	Acidobacteriota	Vicinamibacteria	Vicinamibacterales	uncultured	uncultured_ge
Otu001271	Bacteria	Proteobacteria	Gammaproteobacteria	Xanthomonadales	Rhodanobacteraceae	Tahibacter
Otu001272	Bacteria	Myxococcota	Polyangia	Haliangiales	Haliangiaceae	Haliangium
Otu001273	Bacteria	Chloroflexi	Ktedonobacteria	Ktedonobacterales	JG30-KF-AS9	JG30-KF-AS9_ge
Otu001274	Bacteria	Gemmatimonadota	Gemmatimonadetes	Gemmatimonadales	Gemmatimonadaceae	Gemmatimonadaceae_unclassified
Otu001275	Bacteria	Proteobacteria	Gammaproteobacteria	Burkholderiales	Comamonadaceae	Comamonadaceae_unclassified
Otu001276	Bacteria	Actinobacteriota	Thermoleophilia	Solirubrobacterales	Solirubrobacteraceae	Conexibacter
Otu001277	Bacteria	Chloroflexi	TK10	TK10_or	TK10_fa	TK10_ge
Otu001278	Bacteria	Firmicutes	Bacilli	Bacillales	Planococcaceae	Planococcaceae_unclassified
Otu001280	Bacteria	Actinobacteriota	Thermoleophilia	Solirubrobacterales	67-14	67-14_ge
Otu001281	Bacteria	Actinobacteriota	Actinobacteria	Propionibacteriales	Nocardioidaceae	Nocardioides
Otu001282	Bacteria	Proteobacteria	Alphaproteobacteria	Micropepsales	Micropepsaceae	uncultured
Otu001283	Bacteria	Firmicutes	Bacilli	Thermoactinomycetales	Thermoactinomycetaceae	Shimazuella
Otu001284	Bacteria	Acidobacteriota	Vicinamibacteria	Vicinamibacterales	Vicinamibacteraceae	Vicinamibacteraceae_ge
Otu001285	Bacteria	Proteobacteria	Gammaproteobacteria	Burkholderiales	A21b	A21b_ge
Otu001287	Bacteria	Actinobacteriota	Actinobacteria	Frankiales	Frankiales_unclassified	Frankiales_unclassified
Otu001288	Bacteria	Actinobacteriota	Actinobacteria	Frankiales	Acidothermaceae	Acidothermus
Otu001289	Bacteria	Acidobacteriota	Vicinamibacteria	Vicinamibacterales	uncultured	uncultured_ge
Otu001290	Bacteria	Myxococcota	Polyangia	Haliangiales	Haliangiaceae	Haliangium
Otu001291	Bacteria	Actinobacteriota	Actinobacteria	Propionibacteriales	Propionibacteriaceae	Propionibacteriaceae_unclassified
Otu001292	Bacteria	Firmicutes	Bacilli	Bacillales	Planococcaceae	Lysinibacillus
Otu001293	Bacteria	Proteobacteria	Gammaproteobacteria	Burkholderiales	SC-I-84	SC-I-84_ge
Otu001294	Bacteria	Proteobacteria	Alphaproteobacteria	Acetobacterales	Acetobacteraceae	Acetobacteraceae_unclassified
Otu001295	Bacteria	Actinobacteriota	Actinobacteria	Propionibacteriales	Nocardioidaceae	Nocardioides
Otu001296	Bacteria	Myxococcota	Polyangia	Haliangiales	Haliangiaceae	Haliangium
Otu001297	Bacteria	Acidobacteriota	Acidobacteriae	Bryobacterales	Bryobacteraceae	Bryobacter
Otu001298	Bacteria	Actinobacteriota	Acidimicrobiia	Microtrichales	Ilumatobacteraceae	uncultured
Otu001299	Bacteria	Acidobacteriota	Vicinamibacteria	Vicinamibacterales	Vicinamibacteraceae	Vicinamibacteraceae_ge
Otu001300	Bacteria	Chloroflexi	Ktedonobacteria	C0119	C0119_fa	C0119_ge
Otu001301	Bacteria	Proteobacteria	Gammaproteobacteria	Burkholderiales	Burkholderiaceae	Burkholderia-Caballeronia-Paraburkholderia
Otu001302	Bacteria	Actinobacteriota	Thermoleophilia	Solirubrobacterales	67-14	67-14_ge
Otu001303	Bacteria	Proteobacteria	Gammaproteobacteria	Steroidobacterales	Steroidobacteraceae	uncultured
Otu001304	Bacteria	Acidobacteriota	Vicinamibacteria	Vicinamibacterales	uncultured	uncultured_ge
Otu001305	Bacteria	Actinobacteriota	Thermoleophilia	Solirubrobacterales	Solirubrobacterales_unclassified	Solirubrobacterales_unclassified
Otu001306	Bacteria	Actinobacteriota	Thermoleophilia	Solirubrobacterales	Solirubrobacteraceae	Solirubrobacteraceae_unclassified
Otu001307	Bacteria	Proteobacteria	Gammaproteobacteria	Burkholderiales	Burkholderiaceae	Burkholderia-Caballeronia-Paraburkholderia
Otu001308	Bacteria	Myxococcota	Myxococcia	Myxococcales	Anaeromyxobacteraceae	Anaeromyxobacter
Otu001309	Bacteria	Proteobacteria	Alphaproteobacteria	Rhizobiales	Rhizobiaceae	Rhizobiaceae_unclassified
Otu001310	Bacteria	Proteobacteria	Alphaproteobacteria	Sphingomonadales	Sphingomonadaceae	Novosphingobium
Otu001311	Bacteria	Chloroflexi	TK10	TK10_or	TK10_fa	TK10_ge
Otu001312	Bacteria	Myxococcota	Polyangia	Haliangiales	Haliangiaceae	Haliangium
Otu001313	Bacteria	Verrucomicrobiota	Verrucomicrobiae	Pedosphaerales	Pedosphaeraceae	Pedosphaeraceae_ge
Otu001314	Bacteria	Actinobacteriota	Actinobacteria	Frankiales	Frankiaceae	Jatrophihabitans
Otu001315	Bacteria	Actinobacteriota	Acidimicrobiia	uncultured	uncultured_fa	uncultured_ge
Otu001316	Bacteria	Chloroflexi	Chloroflexia	Thermomicrobiales	AKYG1722	AKYG1722_ge
Otu001317	Bacteria	Actinobacteriota	MB-A2-108	MB-A2-108_or	MB-A2-108_fa	MB-A2-108_ge
Otu001318	Bacteria	Firmicutes	Bacilli	Paenibacillales	Paenibacillaceae	Paenibacillus
Otu001319	Bacteria	Chloroflexi	JG30-KF-CM66	JG30-KF-CM66_or	JG30-KF-CM66_fa	JG30-KF-CM66_ge
Otu001320	Bacteria	Acidobacteriota	Acidobacteriae	Acidobacteriales	Acidobacteriaceae_	Granulicella
Otu001321	Bacteria	Firmicutes	Bacilli	Brevibacillales	Brevibacillaceae	Brevibacillus
Otu001322	Bacteria	Proteobacteria	Gammaproteobacteria	Burkholderiales	Alcaligenaceae	Alcaligenaceae_unclassified
Otu001323	Bacteria	Proteobacteria	Alphaproteobacteria	Rhizobiales	Rhizobiales_Incertae_Sedis	Bauldia
Otu001324	Bacteria	Proteobacteria	Gammaproteobacteria	Burkholderiales	Oxalobacteraceae	Oxalobacteraceae_unclassified
Otu001325	Bacteria	Acidobacteriota	Acidobacteriae	Solibacterales	Solibacteraceae	Candidatus_Solibacter
Otu001326	Bacteria	Actinobacteriota	Thermoleophilia	Solirubrobacterales	67-14	67-14_ge
Otu001327	Bacteria	Actinobacteriota	Thermoleophilia	Gaiellales	Gaiellales_unclassified	Gaiellales_unclassified
Otu001328	Bacteria	Chloroflexi	Chloroflexia	Chloroflexales	Roseiflexaceae	uncultured
Otu001329	Bacteria	Actinobacteriota	Actinobacteria	Frankiales	Sporichthyaceae	Longivirga
Otu001330	Bacteria	Acidobacteriota	Vicinamibacteria	Vicinamibacterales	uncultured	uncultured_ge
Otu001331	Bacteria	Acidobacteriota	Blastocatellia	45985	11-24_fa	11-24_ge
Otu001332	Bacteria	Actinobacteriota	Actinobacteria	Frankiales	Frankiales_unclassified	Frankiales_unclassified
Otu001333	Bacteria	Proteobacteria	Alphaproteobacteria	Rhizobiales	Devosiaceae	Devosiaceae_unclassified
Otu001334	Bacteria	Acidobacteriota	Vicinamibacteria	Subgroup_17	Subgroup_17_fa	Subgroup_17_ge
Otu001335	Bacteria	Acidobacteriota	Vicinamibacteria	Vicinamibacterales	uncultured	uncultured_ge
Otu001336	Bacteria	Actinobacteriota	Thermoleophilia	Gaiellales	uncultured	uncultured_ge
Otu001337	Bacteria	Proteobacteria	Alphaproteobacteria	Sphingomonadales	Sphingomonadaceae	Sphingomonadaceae_unclassified
Otu001338	Bacteria	Firmicutes	Bacilli	Bacillales	Bacillaceae	Bacillus
Otu001339	Bacteria	Proteobacteria	Alphaproteobacteria	Dongiales	Dongiaceae	Dongia
Otu001340	Bacteria	Proteobacteria	Alphaproteobacteria	Sphingomonadales	Sphingomonadaceae	Sphingobium
Otu001341	Bacteria	Actinobacteriota	Acidimicrobiia	Acidimicrobiia_unclassified	Acidimicrobiia_unclassified	Acidimicrobiia_unclassified
Otu001342	Bacteria	Actinobacteriota	Acidimicrobiia	Microtrichales	Ilumatobacteraceae	uncultured
Otu001343	Bacteria	Chloroflexi	Chloroflexia	Thermomicrobiales	Thermomicrobiaceae	Sphaerobacter
Otu001344	Bacteria	Proteobacteria	Gammaproteobacteria	Xanthomonadales	Rhodanobacteraceae	Rhodanobacter
Otu001345	Bacteria	Proteobacteria	Gammaproteobacteria	Burkholderiales	Comamonadaceae	Roseateles
Otu001346	Bacteria	Chloroflexi	Ktedonobacteria	Ktedonobacterales	Ktedonobacteraceae	Ktedonobacteraceae_unclassified
Otu001347	Bacteria	Acidobacteriota	Subgroup_25	Subgroup_25_or	Subgroup_25_fa	Subgroup_25_ge
Otu001348	Bacteria	Acidobacteriota	Acidobacteriae	Acidobacteriales	Acidobacteriaceae_	Occallatibacter
Otu001349	Bacteria	Bacteroidota	Bacteroidia	Chitinophagales	Chitinophagaceae	Terrimonas
Otu001350	Bacteria	Firmicutes	Bacilli	Paenibacillales	Paenibacillaceae	Paenibacillaceae_unclassified
Otu001351	Bacteria	Acidobacteriota	Blastocatellia	Blastocatellales	Blastocatellaceae	uncultured
Otu001352	Bacteria	Chloroflexi	Dehalococcoidia	S085	S085_fa	S085_ge
Otu001354	Bacteria	Proteobacteria	Alphaproteobacteria	Rhizobiales	Rhizobiales_Incertae_Sedis	Nordella
Otu001355	Bacteria	Proteobacteria	Gammaproteobacteria	Steroidobacterales	Steroidobacteraceae	Steroidobacter
Otu001356	Bacteria	Actinobacteriota	Actinobacteria	Corynebacteriales	Mycobacteriaceae	Mycobacterium
Otu001357	Bacteria	Proteobacteria	Alphaproteobacteria	Rhodobacterales	Rhodobacteraceae	Amaricoccus
Otu001358	Bacteria	Acidobacteriota	Acidobacteriae	Bryobacterales	Bryobacteraceae	Bryobacter
Otu001359	Bacteria	Desulfobacterota	uncultured	uncultured_or	uncultured_fa	uncultured_ge
Otu001360	Bacteria	Proteobacteria	Gammaproteobacteria	Burkholderiales	Oxalobacteraceae	Noviherbaspirillum
Otu001361	Bacteria	Actinobacteriota	Thermoleophilia	Solirubrobacterales	67-14	67-14_ge
Otu001362	Bacteria	Gemmatimonadota	Gemmatimonadetes	Gemmatimonadales	Gemmatimonadaceae	Gemmatimonas
Otu001363	Bacteria	Proteobacteria	Gammaproteobacteria	Burkholderiales	SC-I-84	SC-I-84_ge
Otu001364	Bacteria	Acidobacteriota	Vicinamibacteria	Vicinamibacterales	Vicinamibacterales_unclassified	Vicinamibacterales_unclassified
Otu001365	Bacteria	Actinobacteriota	Thermoleophilia	Solirubrobacterales	67-14	67-14_ge
Otu001366	Bacteria	Firmicutes	Bacilli	Brevibacillales	Brevibacillaceae	Brevibacillus
Otu001367	Bacteria	Firmicutes	Bacilli	Bacillales	Bacillaceae	Bacillus
Otu001368	Bacteria	Bacteroidota	Bacteroidia	Chitinophagales	Chitinophagaceae	Ferruginibacter
Otu001369	Bacteria	Proteobacteria	Alphaproteobacteria	Rhizobiales	Xanthobacteraceae	Rhodopseudomonas
Otu001370	Bacteria	Acidobacteriota	Acidobacteriae	Bryobacterales	Bryobacteraceae	Bryobacter
Otu001371	Bacteria	Actinobacteriota	Actinobacteria	Propionibacteriales	Nocardioidaceae	Nocardioides
Otu001372	Bacteria	Proteobacteria	Alphaproteobacteria	Rhizobiales	Beijerinckiaceae	Roseiarcus
Otu001373	Bacteria	Bacteroidota	Bacteroidia	Chitinophagales	Chitinophagaceae	Niastella
Otu001374	Bacteria	Acidobacteriota	Vicinamibacteria	Subgroup_17	Subgroup_17_fa	Subgroup_17_ge
Otu001375	Bacteria	Actinobacteriota	Actinobacteria	Pseudonocardiales	Pseudonocardiaceae	Pseudonocardiaceae_unclassified
Otu001376	Bacteria	Acidobacteriota	Acidobacteriae	Bryobacterales	Bryobacteraceae	Bryobacter
Otu001377	Bacteria	Proteobacteria	Gammaproteobacteria	Burkholderiales	Oxalobacteraceae	Duganella
Otu001378	Bacteria	Bacteroidota	Bacteroidia	Chitinophagales	Chitinophagaceae	Parafilimonas
Otu001379	Bacteria	Proteobacteria	Alphaproteobacteria	Rhizobiales	Kaistiaceae	Kaistia
Otu001380	Bacteria	Bacteria_unclassified	Bacteria_unclassified	Bacteria_unclassified	Bacteria_unclassified	Bacteria_unclassified
Otu001381	Bacteria	Bacteroidota	Bacteroidia	Sphingobacteriales	Sphingobacteriaceae	Sphingobacterium
Otu001382	Bacteria	Gemmatimonadota	Gemmatimonadetes	Gemmatimonadales	Gemmatimonadaceae	uncultured
Otu001383	Bacteria	Verrucomicrobiota	Verrucomicrobiae	Chthoniobacterales	Chthoniobacteraceae	Candidatus_Udaeobacter
Otu001384	Bacteria	Bacteroidota	Bacteroidia	Chitinophagales	Chitinophagaceae	Ferruginibacter
Otu001385	Bacteria	Chloroflexi	Ktedonobacteria	B12-WMSP1	B12-WMSP1_fa	B12-WMSP1_ge
Otu001386	Bacteria	Verrucomicrobiota	Verrucomicrobiae	Verrucomicrobiales	Verrucomicrobiaceae	Roseimicrobium
Otu001387	Bacteria	Bacteroidota	Bacteroidia	Sphingobacteriales	Sphingobacteriaceae	Pedobacter
Otu001388	Bacteria	Acidobacteriota	Vicinamibacteria	Vicinamibacterales	Vicinamibacteraceae	Vicinamibacteraceae_ge
Otu001389	Bacteria	Proteobacteria	Alphaproteobacteria	Rhizobiales	Xanthobacteraceae	Afipia
Otu001390	Bacteria	Actinobacteriota	Thermoleophilia	Solirubrobacterales	67-14	67-14_ge
Otu001391	Bacteria	Actinobacteriota	Thermoleophilia	uncultured	uncultured_fa	uncultured_ge
Otu001392	Bacteria	Cyanobacteria	Cyanobacteriia	Cyanobacteriales	Cyanobacteriales_unclassified	Cyanobacteriales_unclassified
Otu001393	Bacteria	Proteobacteria	Alphaproteobacteria	uncultured	uncultured_fa	uncultured_ge
Otu001394	Bacteria	Actinobacteriota	Acidimicrobiia	IMCC26256	IMCC26256_fa	IMCC26256_ge
Otu001395	Bacteria	Chloroflexi	TK10	TK10_or	TK10_fa	TK10_ge
Otu001396	Bacteria	Acidobacteriota	Thermoanaerobaculia	Thermoanaerobaculales	Thermoanaerobaculaceae	Subgroup_10
Otu001397	Bacteria	Firmicutes	Bacilli	Bacillales	Bacillaceae	Bacillus
Otu001398	Bacteria	Actinobacteriota	Thermoleophilia	Gaiellales	uncultured	uncultured_ge
Otu001399	Bacteria	Bacteroidota	Bacteroidia	Chitinophagales	Chitinophagaceae	Flavisolibacter
Otu001400	Bacteria	Firmicutes	Bacilli	Paenibacillales	Paenibacillaceae	Paenibacillus
Otu001401	Bacteria	Desulfobacterota	Desulfuromonadia	Geobacterales	Geobacteraceae	Geobacter
Otu001402	Bacteria	Acidobacteriota	Subgroup_5	Subgroup_5_or	Subgroup_5_fa	Subgroup_5_ge
Otu001403	Bacteria	Actinobacteriota	Actinobacteria	Micromonosporales	Micromonosporaceae	Krasilnikovia
Otu001404	Bacteria	Actinobacteriota	Actinobacteria	Frankiales	Nakamurellaceae	Nakamurella
Otu001405	Bacteria	WPS-2	WPS-2_cl	WPS-2_or	WPS-2_fa	WPS-2_ge
Otu001407	Bacteria	Actinobacteriota	Actinobacteria	Micrococcales	Promicromonosporaceae	Isoptericola
Otu001408	Bacteria	Bdellovibrionota	Bdellovibrionia	Bdellovibrionales	Bdellovibrionaceae	OM27_clade
Otu001409	Bacteria	Acidobacteriota	Acidobacteriae	Acidobacteriales	uncultured	uncultured_ge
Otu001410	Bacteria	Armatimonadota	uncultured	uncultured_or	uncultured_fa	uncultured_ge
Otu001411	Bacteria	Bacteroidota	Bacteroidia	Chitinophagales	Chitinophagaceae	Puia
Otu001412	Bacteria	Proteobacteria	Alphaproteobacteria	Caulobacterales	Caulobacteraceae	Brevundimonas
Otu001413	Bacteria	Bacteroidota	Bacteroidia	Chitinophagales	Chitinophagaceae	Segetibacter
Otu001414	Bacteria	Myxococcota	Polyangia	Haliangiales	Haliangiaceae	Haliangium
Otu001415	Bacteria	Verrucomicrobiota	Verrucomicrobiae	Chthoniobacterales	Chthoniobacteraceae	Candidatus_Udaeobacter
Otu001416	Bacteria	Chloroflexi	Chloroflexi_unclassified	Chloroflexi_unclassified	Chloroflexi_unclassified	Chloroflexi_unclassified
Otu001417	Bacteria	Firmicutes	Bacilli	Bacillales	Planococcaceae	Paenisporosarcina
Otu001418	Bacteria	Actinobacteriota	Actinobacteria	Frankiales	Cryptosporangiaceae	Cryptosporangium
Otu001419	Bacteria	Firmicutes	Bacilli	Aneurinibacillales	Aneurinibacillaceae	Aneurinibacillus
Otu001421	Bacteria	Gemmatimonadota	Gemmatimonadetes	Gemmatimonadales	Gemmatimonadaceae	Gemmatimonas
Otu001422	Bacteria	Chloroflexi	Ktedonobacteria	Ktedonobacterales	Ktedonobacteraceae	uncultured
Otu001423	Bacteria	Firmicutes	Clostridia	Clostridiales	Clostridiaceae	Clostridium_sensu_stricto_1
Otu001424	Bacteria	Actinobacteriota	Thermoleophilia	Gaiellales	Gaiellaceae	Gaiella
Otu001425	Bacteria	Proteobacteria	Alphaproteobacteria	Rhizobiales	Rhizobiales_unclassified	Rhizobiales_unclassified
Otu001426	Bacteria	Actinobacteriota	Actinobacteria	Corynebacteriales	Mycobacteriaceae	Mycobacterium
Otu001427	Bacteria	Actinobacteriota	Thermoleophilia	Gaiellales	Gaiellaceae	Gaiella
Otu001428	Bacteria	Acidobacteriota	Vicinamibacteria	Vicinamibacterales	uncultured	uncultured_ge
Otu001429	Bacteria	Actinobacteriota	Actinobacteria	Micrococcales	Microbacteriaceae	Agromyces
Otu001430	Bacteria	Proteobacteria	Gammaproteobacteria	Xanthomonadales	Xanthomonadaceae	Lysobacter
Otu001431	Bacteria	Myxococcota	Myxococcia	Myxococcales	Myxococcaceae	Myxococcaceae_unclassified
Otu001432	Bacteria	Bacteria_unclassified	Bacteria_unclassified	Bacteria_unclassified	Bacteria_unclassified	Bacteria_unclassified
Otu001433	Bacteria	Proteobacteria	Alphaproteobacteria	Rhizobiales	Xanthobacteraceae	uncultured
Otu001434	Bacteria	Actinobacteriota	Actinobacteria	Propionibacteriales	Nocardioidaceae	Nocardioides
Otu001435	Bacteria	Actinobacteriota	Actinobacteria	Pseudonocardiales	Pseudonocardiaceae	Umezawaea
Otu001436	Bacteria	Actinobacteriota	Thermoleophilia	Gaiellales	Gaiellales_unclassified	Gaiellales_unclassified
Otu001437	Bacteria	Chloroflexi	Chloroflexia	Thermomicrobiales	JG30-KF-CM45	JG30-KF-CM45_ge
Otu001438	Bacteria	Gemmatimonadota	Gemmatimonadetes	Gemmatimonadales	Gemmatimonadaceae	Gemmatimonas
Otu001439	Bacteria	Gemmatimonadota	Gemmatimonadetes	Gemmatimonadales	Gemmatimonadaceae	Gemmatimonas
Otu001440	Bacteria	Actinobacteriota	Thermoleophilia	Solirubrobacterales	Solirubrobacteraceae	Conexibacter
Otu001441	Bacteria	Myxococcota	Myxococcia	Myxococcales	Anaeromyxobacteraceae	Anaeromyxobacter
Otu001442	Bacteria	Actinobacteriota	Actinobacteria	Propionibacteriales	Nocardioidaceae	Nocardioides
Otu001443	Bacteria	Proteobacteria	Alphaproteobacteria	Acetobacterales	Acetobacteraceae	Acetobacteraceae_unclassified
Otu001444	Bacteria	Actinobacteriota	Acidimicrobiia	IMCC26256	IMCC26256_fa	IMCC26256_ge
Otu001445	Bacteria	Actinobacteriota	Actinobacteria	Micromonosporales	Micromonosporaceae	Micromonosporaceae_unclassified
Otu001446	Bacteria	Proteobacteria	Gammaproteobacteria	Burkholderiales	SC-I-84	SC-I-84_ge
Otu001447	Bacteria	Actinobacteriota	Actinobacteria	Propionibacteriales	Nocardioidaceae	Nocardioides
Otu001448	Bacteria	Proteobacteria	Alphaproteobacteria	Tistrellales	Geminicoccaceae	Candidatus_Alysiosphaera
Otu001449	Bacteria	Actinobacteriota	Actinobacteria	Pseudonocardiales	Pseudonocardiaceae	Pseudonocardia
Otu001450	Bacteria	Bacteria_unclassified	Bacteria_unclassified	Bacteria_unclassified	Bacteria_unclassified	Bacteria_unclassified
Otu001451	Bacteria	Chloroflexi	Ktedonobacteria	Ktedonobacterales	Ktedonobacteraceae	1921-3
Otu001452	Bacteria	Proteobacteria	Alphaproteobacteria	Rhodospirillales	Rhodospirillaceae	uncultured
Otu001453	Bacteria	Proteobacteria	Alphaproteobacteria	Acetobacterales	Acetobacteraceae	Acetobacteraceae_unclassified
Otu001454	Bacteria	Actinobacteriota	Acidimicrobiia	Microtrichales	Ilumatobacteraceae	Ilumatobacteraceae_unclassified
Otu001455	Bacteria	Proteobacteria	Gammaproteobacteria	Xanthomonadales	Rhodanobacteraceae	Rhodanobacteraceae_unclassified
Otu001457	Bacteria	Proteobacteria	Alphaproteobacteria	Caulobacterales	Caulobacteraceae	Phenylobacterium
Otu001458	Bacteria	Actinobacteriota	Thermoleophilia	Solirubrobacterales	Solirubrobacteraceae	Solirubrobacteraceae_unclassified
Otu001459	Bacteria	Chloroflexi	Chloroflexia	Chloroflexales	Herpetosiphonaceae	Herpetosiphon
Otu001460	Bacteria	Proteobacteria	Gammaproteobacteria	Burkholderiales	Comamonadaceae	Ideonella
Otu001461	Bacteria	Proteobacteria	Gammaproteobacteria	Burkholderiales	Comamonadaceae	Caenimonas
Otu001462	Bacteria	Proteobacteria	Alphaproteobacteria	Rhizobiales	Xanthobacteraceae	Xanthobacteraceae_unclassified
Otu001463	Bacteria	Proteobacteria	Alphaproteobacteria	Acetobacterales	Acetobacteraceae	Roseomonas
Otu001464	Bacteria	Bacteroidota	Bacteroidia	Chitinophagales	Chitinophagaceae	Ferruginibacter
Otu001465	Bacteria	Proteobacteria	Alphaproteobacteria	Rhizobiales	Hyphomicrobiaceae	Hyphomicrobium
Otu001466	Bacteria	Proteobacteria	Alphaproteobacteria	Rhizobiales	Rhodomicrobiaceae	Rhodomicrobium
Otu001467	Bacteria	Proteobacteria	Gammaproteobacteria	Burkholderiales	Nitrosomonadaceae	MND1
Otu001468	Bacteria	Bacteroidota	Bacteroidia	Cytophagales	Microscillaceae	uncultured
Otu001469	Bacteria	Proteobacteria	Gammaproteobacteria	Burkholderiales	Oxalobacteraceae	Oxalobacteraceae_unclassified
Otu001470	Bacteria	Chloroflexi	Ktedonobacteria	C0119	C0119_fa	C0119_ge
Otu001471	Bacteria	Chloroflexi	Ktedonobacteria	Ktedonobacterales	Ktedonobacteraceae	HSB_OF53-F07
Otu001472	Bacteria	Bacteria_unclassified	Bacteria_unclassified	Bacteria_unclassified	Bacteria_unclassified	Bacteria_unclassified
Otu001473	Bacteria	Actinobacteriota	Actinobacteria	Micromonosporales	Micromonosporaceae	Phytohabitans
Otu001474	Bacteria	Actinobacteriota	Acidimicrobiia	IMCC26256	IMCC26256_fa	IMCC26256_ge
Otu001475	Bacteria	Actinobacteriota	Thermoleophilia	Solirubrobacterales	Solirubrobacteraceae	Conexibacter
Otu001476	Bacteria	Actinobacteriota	Thermoleophilia	Gaiellales	uncultured	uncultured_ge
Otu001477	Bacteria	Proteobacteria	Alphaproteobacteria	Rhizobiales	Hyphomicrobiaceae	Hyphomicrobium
Otu001478	Bacteria	Proteobacteria	Gammaproteobacteria	Burkholderiales	Burkholderiaceae	Burkholderia-Caballeronia-Paraburkholderia
Otu001479	Bacteria	Proteobacteria	Gammaproteobacteria	Burkholderiales	Nitrosomonadaceae	MND1
Otu001480	Bacteria	Actinobacteriota	Thermoleophilia	Solirubrobacterales	Solirubrobacteraceae	Conexibacter
Otu001481	Bacteria	Acidobacteriota	Vicinamibacteria	Vicinamibacterales	Vicinamibacterales_unclassified	Vicinamibacterales_unclassified
Otu001482	Bacteria	Actinobacteriota	Thermoleophilia	Gaiellales	uncultured	uncultured_ge
Otu001483	Bacteria	Chloroflexi	TK10	TK10_or	TK10_fa	TK10_ge
Otu001484	Bacteria	Chloroflexi	Ktedonobacteria	B10-SB3A	B10-SB3A_fa	B10-SB3A_ge
Otu001485	Bacteria	Cyanobacteria	Cyanobacteriia	Cyanobacteriales	Phormidiaceae	Tychonema_CCAP_1459-11B
Otu001486	Bacteria	Actinobacteriota	Actinobacteria	Micromonosporales	Micromonosporaceae	Micromonosporaceae_unclassified
Otu001487	Bacteria	Actinobacteriota	MB-A2-108	MB-A2-108_or	MB-A2-108_fa	MB-A2-108_ge
Otu001488	Bacteria	Bacteroidota	Bacteroidia	Flavobacteriales	Flavobacteriaceae	Flavobacterium
Otu001489	Bacteria	Acidobacteriota	Thermoanaerobaculia	Thermoanaerobaculales	Thermoanaerobaculaceae	Subgroup_10
Otu001490	Bacteria	WPS-2	WPS-2_cl	WPS-2_or	WPS-2_fa	WPS-2_ge
Otu001491	Bacteria	Gemmatimonadota	Gemmatimonadetes	Gemmatimonadales	Gemmatimonadaceae	uncultured
Otu001492	Bacteria	Acidobacteriota	Vicinamibacteria	Subgroup_17	Subgroup_17_fa	Subgroup_17_ge
Otu001493	Bacteria	Fibrobacterota	Fibrobacteria	Fibrobacterales	Fibrobacteraceae	possible_genus_04
Otu001494	Bacteria	Proteobacteria	Alphaproteobacteria	Rhizobiales	Rhizobiaceae	Ochrobactrum
Otu001495	Bacteria	Proteobacteria	Alphaproteobacteria	Elsterales	Elsterales_unclassified	Elsterales_unclassified
Otu001496	Bacteria	Proteobacteria	Gammaproteobacteria	PLTA13	PLTA13_fa	PLTA13_ge
Otu001497	Bacteria	Proteobacteria	Alphaproteobacteria	Rhizobiales	Rhizobiales_Incertae_Sedis	uncultured
Otu001498	Bacteria	Acidobacteriota	Vicinamibacteria	Vicinamibacterales	uncultured	uncultured_ge
Otu001499	Bacteria	Actinobacteriota	MB-A2-108	MB-A2-108_or	MB-A2-108_fa	MB-A2-108_ge
Otu001500	Bacteria	Desulfobacterota	uncultured	uncultured_or	uncultured_fa	uncultured_ge
Otu001501	Bacteria	Firmicutes	Bacilli	Bacillales	Bacillales_unclassified	Bacillales_unclassified
Otu001502	Bacteria	Proteobacteria	Gammaproteobacteria	Burkholderiales	Alcaligenaceae	Alcaligenaceae_ge
Otu001503	Bacteria	Proteobacteria	Gammaproteobacteria	Pseudomonadales	Moraxellaceae	Acinetobacter
Otu001504	Bacteria	Proteobacteria	Gammaproteobacteria	Burkholderiales	Comamonadaceae	Methylibium
Otu001505	Bacteria	Acidobacteriota	Acidobacteriae	Subgroup_2	Subgroup_2_fa	Subgroup_2_ge
Otu001506	Bacteria	Bacteroidota	Bacteroidia	Flavobacteriales	Flavobacteriaceae	Flavobacterium
Otu001507	Bacteria	Acidobacteriota	Blastocatellia	Pyrinomonadales	Pyrinomonadaceae	RB41
Otu001508	Bacteria	Actinobacteriota	MB-A2-108	MB-A2-108_or	MB-A2-108_fa	MB-A2-108_ge
Otu001509	Bacteria	Actinobacteriota	Thermoleophilia	Gaiellales	uncultured	uncultured_ge
Otu001510	Bacteria	Proteobacteria	Gammaproteobacteria	Burkholderiales	Nitrosomonadaceae	MND1
Otu001512	Bacteria	Firmicutes	Clostridia	Peptostreptococcales-Tissierellales	Family_XI	Tissierella
Otu001513	Bacteria	Myxococcota	Polyangia	Polyangiales	BIrii41	BIrii41_ge
Otu001514	Bacteria	Chloroflexi	Dehalococcoidia	S085	S085_fa	S085_ge
Otu001515	Bacteria	Gemmatimonadota	Gemmatimonadetes	Gemmatimonadales	Gemmatimonadaceae	uncultured
Otu001516	Bacteria	Proteobacteria	Gammaproteobacteria	Gammaproteobacteria_Incertae_Sedis	Unknown_Family	Acidibacter
Otu001517	Bacteria	Proteobacteria	Gammaproteobacteria	Burkholderiales	Burkholderiales_unclassified	Burkholderiales_unclassified
Otu001518	Bacteria	Bacteroidota	Bacteroidia	Chitinophagales	Chitinophagaceae	Taibaiella
Otu001519	Bacteria	Myxococcota	Myxococcia	Myxococcales	Myxococcaceae	Cystobacter
Otu001520	Bacteria	Proteobacteria	Alphaproteobacteria	Alphaproteobacteria_unclassified	Alphaproteobacteria_unclassified	Alphaproteobacteria_unclassified
Otu001521	Bacteria	Acidobacteriota	Holophagae	Subgroup_7	Subgroup_7_fa	Subgroup_7_ge
Otu001522	Bacteria	Myxococcota	Polyangia	Nannocystales	Nannocystaceae	Nannocystis
Otu001523	Bacteria	Proteobacteria	Alphaproteobacteria	Rhizobiales	Beijerinckiaceae	Methylovirgula
Otu001524	Bacteria	Actinobacteriota	Actinobacteria	Micromonosporales	Micromonosporaceae	uncultured
Otu001525	Bacteria	Proteobacteria	Alphaproteobacteria	Elsterales	Elsterales_unclassified	Elsterales_unclassified
Otu001526	Bacteria	Proteobacteria	Alphaproteobacteria	Tistrellales	Geminicoccaceae	Candidatus_Alysiosphaera
Otu001527	Bacteria	Chloroflexi	Chloroflexia	Chloroflexales	Roseiflexaceae	uncultured
Otu001528	Bacteria	Proteobacteria	Gammaproteobacteria	Xanthomonadales	Rhodanobacteraceae	Dyella
Otu001529	Bacteria	Myxococcota	Myxococcia	Myxococcales	Anaeromyxobacteraceae	Anaeromyxobacter
Otu001530	Bacteria	Proteobacteria	Alphaproteobacteria	Rhizobiales	Rhizobiaceae	Allorhizobium-Neorhizobium-Pararhizobium-Rhizobium
Otu001531	Bacteria	Proteobacteria	Alphaproteobacteria	Defluviicoccales	Defluviicoccaceae	Defluviicoccus
Otu001532	Bacteria	Proteobacteria	Gammaproteobacteria	Xanthomonadales	Rhodanobacteraceae	Dyella
Otu001533	Bacteria	Myxococcota	Polyangia	Polyangiales	Polyangiaceae	Pajaroellobacter
Otu001534	Bacteria	Acidobacteriota	Vicinamibacteria	Vicinamibacterales	uncultured	uncultured_ge
Otu001535	Bacteria	Chloroflexi	Chloroflexia	Thermomicrobiales	JG30-KF-CM45	JG30-KF-CM45_ge
Otu001536	Bacteria	Chloroflexi	Ktedonobacteria	Ktedonobacterales	Ktedonobacteraceae	G12-WMSP1
Otu001537	Bacteria	Patescibacteria	Saccharimonadia	Saccharimonadales	LWQ8	LWQ8_ge
Otu001538	Bacteria	Actinobacteriota	Actinobacteria	Frankiales	Geodermatophilaceae	Geodermatophilaceae_unclassified
Otu001539	Bacteria	Firmicutes	Bacilli	Paenibacillales	Paenibacillaceae	Paenibacillus
Otu001540	Bacteria	Cyanobacteria	Sericytochromatia	Sericytochromatia_or	Sericytochromatia_fa	Sericytochromatia_ge
Otu001541	Bacteria	Proteobacteria	Gammaproteobacteria	Xanthomonadales	Xanthomonadaceae	Arenimonas
Otu001542	Bacteria	Chloroflexi	Ktedonobacteria	C0119	C0119_fa	C0119_ge
Otu001543	Bacteria	Bacteroidota	Bacteroidia	Chitinophagales	Chitinophagaceae	Flavisolibacter
Otu001544	Bacteria	Firmicutes	Bacilli	Paenibacillales	Paenibacillaceae	Paenibacillus
Otu001545	Bacteria	Proteobacteria	Alphaproteobacteria	Tistrellales	Geminicoccaceae	Geminicoccaceae_unclassified
Otu001546	Bacteria	Proteobacteria	Alphaproteobacteria	Acetobacterales	Acetobacteraceae	Acidiphilium
Otu001547	Bacteria	Proteobacteria	Gammaproteobacteria	Burkholderiales	Burkholderiaceae	Burkholderia-Caballeronia-Paraburkholderia
Otu001548	Bacteria	Bacteroidota	Bacteroidia	Chitinophagales	Chitinophagaceae	Chitinophagaceae_unclassified
Otu001549	Bacteria	Proteobacteria	Alphaproteobacteria	Holosporales	Holosporaceae	uncultured
Otu001550	Bacteria	Actinobacteriota	Actinobacteria	Pseudonocardiales	Pseudonocardiaceae	Pseudonocardia
Otu001551	Bacteria	Firmicutes	Clostridia	Clostridiales	Clostridiaceae	Clostridium_sensu_stricto_8
Otu001552	Bacteria	Proteobacteria	Alphaproteobacteria	Acetobacterales	Acetobacteraceae	Acetobacteraceae_unclassified
Otu001553	Bacteria	Acidobacteriota	Vicinamibacteria	Vicinamibacterales	uncultured	uncultured_ge
Otu001554	Bacteria	Acidobacteriota	Acidobacteriae	Acidobacteriales	uncultured	uncultured_ge
Otu001555	Bacteria	Proteobacteria	Alphaproteobacteria	Acetobacterales	Acetobacteraceae	Roseomonas
Otu001556	Bacteria	Acidobacteriota	Acidobacteriae	Acidobacteriales	uncultured	uncultured_ge
Otu001558	Bacteria	Actinobacteriota	Actinobacteria	Actinobacteria_unclassified	Actinobacteria_unclassified	Actinobacteria_unclassified
Otu001559	Bacteria	Actinobacteriota	Actinobacteria	Propionibacteriales	Propionibacteriaceae	Micropruina
Otu001560	Bacteria	Actinobacteriota	Actinobacteria	Propionibacteriales	Nocardioidaceae	Nocardioides
Otu001561	Bacteria	Desulfobacterota	Desulfuromonadia	Geobacterales	Geobacteraceae	Citrifermentans
Otu001562	Bacteria	Chloroflexi	Chloroflexi_unclassified	Chloroflexi_unclassified	Chloroflexi_unclassified	Chloroflexi_unclassified
Otu001563	Bacteria	Actinobacteriota	Thermoleophilia	Solirubrobacterales	Solirubrobacterales_unclassified	Solirubrobacterales_unclassified
Otu001564	Bacteria	Bacteroidota	Bacteroidia	Chitinophagales	Chitinophagaceae	Parasegetibacter
Otu001565	Bacteria	Chloroflexi	Chloroflexia	Chloroflexales	Chloroflexaceae	Chloroflexaceae_unclassified
Otu001566	Bacteria	Acidobacteriota	Subgroup_5	Subgroup_5_or	Subgroup_5_fa	Subgroup_5_ge
Otu001567	Bacteria	Actinobacteriota	Thermoleophilia	Solirubrobacterales	67-14	67-14_ge
Otu001568	Bacteria	Proteobacteria	Alphaproteobacteria	Reyranellales	Reyranellaceae	uncultured
Otu001569	Bacteria	Chloroflexi	Chloroflexia	Thermomicrobiales	JG30-KF-CM45	JG30-KF-CM45_ge
Otu001570	Bacteria	Actinobacteriota	Actinobacteria	Micrococcales	Micrococcaceae	Glutamicibacter
Otu001571	Bacteria	Acidobacteriota	Vicinamibacteria	Vicinamibacterales	uncultured	uncultured_ge
Otu001572	Bacteria	Proteobacteria	Gammaproteobacteria	Burkholderiales	Comamonadaceae	Aquabacterium
Otu001573	Bacteria	Firmicutes	Clostridia	Clostridiales	Clostridiaceae	Clostridium_sensu_stricto_10
Otu001574	Bacteria	Acidobacteriota	Thermoanaerobaculia	Thermoanaerobaculales	Thermoanaerobaculaceae	Subgroup_10
Otu001575	Bacteria	Actinobacteriota	MB-A2-108	MB-A2-108_or	MB-A2-108_fa	MB-A2-108_ge
Otu001576	Bacteria	Acidobacteriota	Holophagae	Subgroup_7	Subgroup_7_fa	Subgroup_7_ge
Otu001577	Bacteria	Proteobacteria	Alphaproteobacteria	Elsterales	uncultured	uncultured_ge
Otu001578	Bacteria	Proteobacteria	Alphaproteobacteria	Elsterales	uncultured	uncultured_ge
Otu001579	Bacteria	Proteobacteria	Gammaproteobacteria	Burkholderiales	SC-I-84	SC-I-84_ge
Otu001580	Bacteria	Chloroflexi	Chloroflexi_unclassified	Chloroflexi_unclassified	Chloroflexi_unclassified	Chloroflexi_unclassified
Otu001581	Bacteria	Chloroflexi	Chloroflexia	Thermomicrobiales	JG30-KF-CM45	JG30-KF-CM45_ge
Otu001582	Bacteria	Actinobacteriota	Actinobacteria	Micrococcales	Microbacteriaceae	Lysinimonas
Otu001583	Bacteria	Proteobacteria	Alphaproteobacteria	Acetobacterales	Acetobacteraceae	Belnapia
Otu001584	Bacteria	Chloroflexi	Dehalococcoidia	S085	S085_fa	S085_ge
Otu001585	Bacteria	Patescibacteria	Saccharimonadia	Saccharimonadales	Saccharimonadaceae	TM7a
Otu001586	Bacteria	Cyanobacteria	Cyanobacteriia	Leptolyngbyales	Leptolyngbyaceae	Leptolyngbya_PCC-6306
Otu001587	Bacteria	Proteobacteria	Alphaproteobacteria	uncultured	uncultured_fa	uncultured_ge
Otu001588	Bacteria	Proteobacteria	Alphaproteobacteria	Rhizobiales	Hyphomicrobiaceae	uncultured
Otu001589	Bacteria	Actinobacteriota	Actinobacteria	Micrococcales	Dermabacteraceae	Brachybacterium
Otu001590	Bacteria	Proteobacteria	Alphaproteobacteria	Sphingomonadales	Sphingomonadaceae	Sphingomonadaceae_unclassified
Otu001591	Bacteria	Proteobacteria	Alphaproteobacteria	Rhizobiales	Beijerinckiaceae	Beijerinckiaceae_unclassified
Otu001592	Bacteria	Actinobacteriota	Thermoleophilia	Solirubrobacterales	Solirubrobacteraceae	Solirubrobacter
Otu001593	Bacteria	Actinobacteriota	Acidimicrobiia	IMCC26256	IMCC26256_fa	IMCC26256_ge
Otu001594	Bacteria	Bacteroidota	Bacteroidia	Chitinophagales	Chitinophagaceae	uncultured
Otu001595	Bacteria	Proteobacteria	Gammaproteobacteria	Burkholderiales	Comamonadaceae	Rubrivivax
Otu001596	Bacteria	Acidobacteriota	Blastocatellia	Blastocatellales	Blastocatellaceae	Blastocatellaceae_unclassified
Otu001597	Bacteria	Proteobacteria	Alphaproteobacteria	Acetobacterales	Acetobacteraceae	Acetobacteraceae_unclassified
Otu001598	Bacteria	Acidobacteriota	Acidobacteriae	Acidobacteriales	Koribacteraceae	Candidatus_Koribacter
Otu001599	Bacteria	Proteobacteria	Alphaproteobacteria	Rhizobiales	Beijerinckiaceae	Microvirga
Otu001600	Bacteria	Chloroflexi	Ktedonobacteria	Ktedonobacterales	Ktedonobacteraceae	1921-2
Otu001601	Bacteria	Verrucomicrobiota	Verrucomicrobiae	Chthoniobacterales	Chthoniobacteraceae	Chthoniobacter
Otu001602	Bacteria	Actinobacteriota	Acidimicrobiia	Microtrichales	Iamiaceae	Iamia
Otu001603	Bacteria	Actinobacteriota	Acidimicrobiia	Microtrichales	uncultured	uncultured_ge
Otu001604	Bacteria	Desulfobacterota	uncultured	uncultured_or	uncultured_fa	uncultured_ge
Otu001605	Bacteria	Proteobacteria	Alphaproteobacteria	Sphingomonadales	Sphingomonadaceae	Sphingomonadaceae_unclassified
Otu001606	Bacteria	Acidobacteriota	Acidobacteriae	Bryobacterales	Bryobacteraceae	Bryobacter
Otu001607	Bacteria	Proteobacteria	Gammaproteobacteria	Burkholderiales	SC-I-84	SC-I-84_ge
Otu001608	Bacteria	Actinobacteriota	Thermoleophilia	Solirubrobacterales	67-14	67-14_ge
Otu001609	Bacteria	Proteobacteria	Alphaproteobacteria	Elsterales	uncultured	uncultured_ge
Otu001611	Bacteria	Acidobacteriota	Acidobacteriae	Solibacterales	Solibacteraceae	Candidatus_Solibacter
Otu001612	Bacteria	Acidobacteriota	Acidobacteriae	Bryobacterales	Bryobacteraceae	Bryobacter
Otu001613	Bacteria	Proteobacteria	Gammaproteobacteria	Burkholderiales	Comamonadaceae	Polaromonas
Otu001614	Bacteria	Actinobacteriota	Acidimicrobiia	Microtrichales	Microtrichaceae	IMCC26207
Otu001615	Bacteria	Chloroflexi	Chloroflexi_unclassified	Chloroflexi_unclassified	Chloroflexi_unclassified	Chloroflexi_unclassified
Otu001616	Bacteria	Actinobacteriota	Actinobacteria	Propionibacteriales	Nocardioidaceae	Nocardioides
Otu001617	Bacteria	Actinobacteriota	Actinobacteriota_unclassified	Actinobacteriota_unclassified	Actinobacteriota_unclassified	Actinobacteriota_unclassified
Otu001618	Bacteria	Actinobacteriota	Acidimicrobiia	Acidimicrobiia_unclassified	Acidimicrobiia_unclassified	Acidimicrobiia_unclassified
Otu001619	Bacteria	Chloroflexi	Ktedonobacteria	B10-SB3A	B10-SB3A_fa	B10-SB3A_ge
Otu001620	Bacteria	Proteobacteria	Alphaproteobacteria	Caulobacterales	Caulobacteraceae	uncultured
Otu001621	Bacteria	Proteobacteria	Gammaproteobacteria	Xanthomonadales	Xanthomonadaceae	Luteimonas
Otu001622	Bacteria	Chloroflexi	Chloroflexia	Thermomicrobiales	JG30-KF-CM45	JG30-KF-CM45_ge
Otu001624	Bacteria	Proteobacteria	Alphaproteobacteria	Rhizobiales	Rhizobiales_Incertae_Sedis	uncultured
Otu001625	Bacteria	Actinobacteriota	Thermoleophilia	Solirubrobacterales	Solirubrobacterales_unclassified	Solirubrobacterales_unclassified
Otu001626	Bacteria	Acidobacteriota	Acidobacteriae	Acidobacteriae_or	Acidobacteriae_fa	Paludibaculum
Otu001627	Bacteria	Chloroflexi	Ktedonobacteria	C0119	C0119_fa	C0119_ge
Otu001628	Bacteria	Actinobacteriota	Acidimicrobiia	Microtrichales	Microtrichales_unclassified	Microtrichales_unclassified
Otu001629	Bacteria	Proteobacteria	Gammaproteobacteria	Burkholderiales	Nitrosomonadaceae	MND1
Otu001630	Bacteria	Gemmatimonadota	Longimicrobia	Longimicrobiales	Longimicrobiaceae	YC-ZSS-LKJ147
Otu001631	Bacteria	Acidobacteriota	Holophagae	Subgroup_7	Subgroup_7_fa	Subgroup_7_ge
Otu001632	Bacteria	Chloroflexi	Ktedonobacteria	Ktedonobacterales	Ktedonobacteraceae	1921-3
Otu001633	Bacteria	Actinobacteriota	Actinobacteria	Micrococcales	Intrasporangiaceae	Intrasporangiaceae_unclassified
Otu001634	Bacteria	Actinobacteriota	Acidimicrobiia	Microtrichales	Microtrichaceae	IMCC26207
Otu001635	Bacteria	Acidobacteriota	Holophagae	Subgroup_7	Subgroup_7_fa	Subgroup_7_ge
Otu001636	Bacteria	Verrucomicrobiota	Verrucomicrobiae	Chthoniobacterales	Chthoniobacteraceae	Candidatus_Udaeobacter
Otu001637	Bacteria	Acidobacteriota	Holophagae	Subgroup_7	Subgroup_7_fa	Subgroup_7_ge
Otu001638	Bacteria	Latescibacterota	Latescibacteria	Latescibacterales	Latescibacteraceae	Latescibacteraceae_ge
Otu001639	Bacteria	Actinobacteriota	Thermoleophilia	Solirubrobacterales	67-14	67-14_ge
Otu001640	Bacteria	Proteobacteria	Alphaproteobacteria	Tistrellales	Geminicoccaceae	Candidatus_Alysiosphaera
Otu001641	Bacteria	Gemmatimonadota	Gemmatimonadetes	Gemmatimonadales	Gemmatimonadaceae	uncultured
Otu001642	Bacteria	Actinobacteriota	Actinobacteria	Micrococcales	Intrasporangiaceae	Intrasporangiaceae_unclassified
Otu001643	Bacteria	Proteobacteria	Gammaproteobacteria	Burkholderiales	SC-I-84	SC-I-84_ge
Otu001644	Bacteria	Acidobacteriota	Acidobacteriae	Acidobacteriales	uncultured	uncultured_ge
Otu001645	Bacteria	Proteobacteria	Alphaproteobacteria	Acetobacterales	Acetobacteraceae	Craurococcus-Caldovatus
Otu001646	Bacteria	Actinobacteriota	Actinobacteria	Propionibacteriales	Nocardioidaceae	Nocardioides
Otu001647	Bacteria	Acidobacteriota	Acidobacteriae	Acidobacteriae_unclassified	Acidobacteriae_unclassified	Acidobacteriae_unclassified
Otu001648	Bacteria	Gemmatimonadota	Gemmatimonadetes	Gemmatimonadales	Gemmatimonadaceae	Gemmatimonadaceae_unclassified
Otu001649	Bacteria	Actinobacteriota	Acidimicrobiia	Acidimicrobiia_unclassified	Acidimicrobiia_unclassified	Acidimicrobiia_unclassified
Otu001650	Bacteria	Proteobacteria	Alphaproteobacteria	Azospirillales	Azospirillaceae	Skermanella
Otu001652	Bacteria	Gemmatimonadota	Gemmatimonadetes	Gemmatimonadales	Gemmatimonadaceae	Gemmatimonadaceae_unclassified
Otu001653	Bacteria	Chloroflexi	Chloroflexia	Chloroflexales	Chloroflexales_unclassified	Chloroflexales_unclassified
Otu001654	Bacteria	Verrucomicrobiota	Verrucomicrobiae	Pedosphaerales	Pedosphaeraceae	Pedosphaeraceae_ge
Otu001655	Bacteria	Myxococcota	Polyangia	Polyangiales	Polyangiaceae	Pajaroellobacter
Otu001656	Bacteria	Myxococcota	Polyangia	Haliangiales	Haliangiaceae	Haliangium
Otu001657	Bacteria	Acidobacteriota	Vicinamibacteria	Vicinamibacterales	Vicinamibacteraceae	Vicinamibacter
Otu001658	Bacteria	Acidobacteriota	Acidobacteriae	Acidobacteriae_unclassified	Acidobacteriae_unclassified	Acidobacteriae_unclassified
Otu001659	Bacteria	Gemmatimonadota	Gemmatimonadetes	Gemmatimonadales	Gemmatimonadaceae	uncultured
Otu001660	Bacteria	Proteobacteria	Alphaproteobacteria	Dongiales	Dongiaceae	Dongia
Otu001661	Bacteria	Chloroflexi	Ktedonobacteria	C0119	C0119_fa	C0119_ge
Otu001662	Bacteria	Chloroflexi	Chloroflexia	Thermomicrobiales	Thermomicrobiaceae	Sphaerobacter
Otu001663	Bacteria	Actinobacteriota	Acidimicrobiia	uncultured	uncultured_fa	uncultured_ge
Otu001664	Bacteria	Gemmatimonadota	Gemmatimonadetes	Gemmatimonadales	Gemmatimonadaceae	Gemmatimonadaceae_unclassified
Otu001665	Bacteria	Actinobacteriota	Thermoleophilia	Gaiellales	uncultured	uncultured_ge
Otu001667	Bacteria	Chloroflexi	Ktedonobacteria	Ktedonobacterales	Ktedonobacteraceae	Ktedonobacteraceae_unclassified
Otu001668	Bacteria	Chloroflexi	Ktedonobacteria	Ktedonobacterales	JG30-KF-AS9	JG30-KF-AS9_ge
Otu001669	Bacteria	Actinobacteriota	Actinobacteria	Micromonosporales	Micromonosporaceae	Micromonosporaceae_unclassified
Otu001670	Bacteria	Acidobacteriota	Vicinamibacteria	Vicinamibacterales	Vicinamibacterales_unclassified	Vicinamibacterales_unclassified
Otu001671	Bacteria	Proteobacteria	Alphaproteobacteria	Acetobacterales	Acetobacteraceae	Roseomonas
Otu001672	Bacteria	Myxococcota	Polyangia	Polyangiales	Polyangiaceae	Pajaroellobacter
Otu001673	Bacteria	Actinobacteriota	Actinobacteriota_unclassified	Actinobacteriota_unclassified	Actinobacteriota_unclassified	Actinobacteriota_unclassified
Otu001674	Bacteria	Verrucomicrobiota	Verrucomicrobiae	Chthoniobacterales	Chthoniobacteraceae	Candidatus_Udaeobacter
Otu001675	Bacteria	Cyanobacteria	Cyanobacteriia	Cyanobacteriales	Nostocaceae	Nostoc_PCC-73102
Otu001676	Bacteria	Methylomirabilota	Methylomirabilia	Rokubacteriales	Rokubacteriales_fa	Rokubacteriales_ge
Otu001677	Bacteria	Chloroflexi	AD3	AD3_or	AD3_fa	AD3_ge
Otu001678	Bacteria	Proteobacteria	Gammaproteobacteria	Xanthomonadales	Rhodanobacteraceae	Rhodanobacter
Otu001679	Bacteria	Proteobacteria	Gammaproteobacteria	Pseudomonadales	Pseudomonadales_unclassified	Pseudomonadales_unclassified
Otu001680	Bacteria	Proteobacteria	Gammaproteobacteria	JG36-TzT-191	JG36-TzT-191_fa	JG36-TzT-191_ge
Otu001681	Bacteria	Actinobacteriota	Thermoleophilia	Gaiellales	uncultured	uncultured_ge
Otu001682	Bacteria	Actinobacteriota	Actinobacteria	Propionibacteriales	Nocardioidaceae	Nocardioides
Otu001683	Bacteria	Gemmatimonadota	Gemmatimonadetes	Gemmatimonadales	Gemmatimonadaceae	Gemmatimonadaceae_unclassified
Otu001684	Bacteria	Actinobacteriota	Thermoleophilia	Gaiellales	Gaiellales_unclassified	Gaiellales_unclassified
Otu001685	Bacteria	Acidobacteriota	Vicinamibacteria	Vicinamibacterales	uncultured	uncultured_ge
Otu001686	Bacteria	Acidobacteriota	Acidobacteriae	Subgroup_2	Subgroup_2_fa	Subgroup_2_ge
Otu001687	Bacteria	Actinobacteriota	Actinobacteria	Micrococcales	Micrococcales_unclassified	Micrococcales_unclassified
Otu001688	Bacteria	Myxococcota	Polyangia	Haliangiales	Haliangiaceae	Haliangium
Otu001689	Bacteria	Firmicutes	Bacilli	Paenibacillales	Paenibacillaceae	Paenibacillus
Otu001690	Bacteria	Proteobacteria	Gammaproteobacteria	Enterobacterales	Erwiniaceae	Erwiniaceae_unclassified
Otu001691	Bacteria	Myxococcota	Myxococcia	Myxococcales	Myxococcaceae	Corallococcus
Otu001692	Bacteria	Acidobacteriota	Thermoanaerobaculia	Thermoanaerobaculales	Thermoanaerobaculaceae	Subgroup_10
Otu001693	Bacteria	Acidobacteriota	Thermoanaerobaculia	Thermoanaerobaculales	Thermoanaerobaculaceae	Subgroup_10
Otu001694	Bacteria	Actinobacteriota	Actinobacteria	Pseudonocardiales	Pseudonocardiaceae	Actinophytocola
Otu001695	Bacteria	Proteobacteria	Gammaproteobacteria	Burkholderiales	Nitrosomonadaceae	mle1-7
Otu001696	Bacteria	Gemmatimonadota	Gemmatimonadetes	Gemmatimonadales	Gemmatimonadaceae	uncultured
Otu001697	Bacteria	Firmicutes	Bacilli	Bacillales	Bacillaceae	Bacillus
Otu001698	Bacteria	Acidobacteriota	Acidobacteriae	Acidobacteriales	Acidobacteriales_unclassified	Acidobacteriales_unclassified
Otu001699	Bacteria	Proteobacteria	Alphaproteobacteria	Elsterales	uncultured	uncultured_ge
Otu001700	Bacteria	Actinobacteriota	Thermoleophilia	Solirubrobacterales	Solirubrobacteraceae	uncultured
Otu001701	Bacteria	Proteobacteria	Gammaproteobacteria	Burkholderiales	A21b	A21b_ge
Otu001702	Bacteria	Actinobacteriota	Actinobacteria	Frankiales	Frankiales_unclassified	Frankiales_unclassified
Otu001703	Bacteria	Proteobacteria	Alphaproteobacteria	Rhizobiales	A0839	A0839_ge
Otu001704	Bacteria	Proteobacteria	Gammaproteobacteria	Xanthomonadales	Xanthomonadales_unclassified	Xanthomonadales_unclassified
Otu001705	Bacteria	Proteobacteria	Alphaproteobacteria	Rhizobiales	Xanthobacteraceae	Rhodoplanes
Otu001706	Bacteria	Chloroflexi	Ktedonobacteria	C0119	C0119_fa	C0119_ge
Otu001707	Bacteria	Acidobacteriota	Vicinamibacteria	Vicinamibacterales	uncultured	uncultured_ge
Otu001708	Bacteria	Acidobacteriota	Acidobacteriae	Bryobacterales	Bryobacteraceae	Bryobacter
Otu001709	Bacteria	Actinobacteriota	Actinobacteria	Micrococcales	Micrococcaceae	Paeniglutamicibacter
Otu001710	Bacteria	Acidobacteriota	Vicinamibacteria	Vicinamibacterales	uncultured	uncultured_ge
Otu001711	Bacteria	Acidobacteriota	Subgroup_5	Subgroup_5_or	Subgroup_5_fa	Subgroup_5_ge
Otu001712	Bacteria	Proteobacteria	Alphaproteobacteria	Caulobacterales	Caulobacteraceae	Brevundimonas
Otu001713	Bacteria	Acidobacteriota	Vicinamibacteria	Vicinamibacterales	uncultured	uncultured_ge
Otu001714	Bacteria	Bacteroidota	Bacteroidia	Chitinophagales	Chitinophagaceae	uncultured
Otu001715	Bacteria	Acidobacteriota	Vicinamibacteria	Vicinamibacterales	Vicinamibacteraceae	Vicinamibacteraceae_ge
Otu001716	Bacteria	Firmicutes	Bacilli	Paenibacillales	Paenibacillaceae	Paenibacillus
Otu001717	Bacteria	Bacteroidota	Bacteroidia	Chitinophagales	Chitinophagaceae	Segetibacter
Otu001718	Bacteria	Methylomirabilota	Methylomirabilia	Rokubacteriales	Rokubacteriales_fa	Rokubacteriales_ge
Otu001719	Bacteria	Verrucomicrobiota	Verrucomicrobiae	Chthoniobacterales	Chthoniobacteraceae	Candidatus_Udaeobacter
Otu001720	Bacteria	Chloroflexi	Chloroflexia	Chloroflexales	Chloroflexales_unclassified	Chloroflexales_unclassified
Otu001721	Bacteria	Actinobacteriota	Actinobacteria	Pseudonocardiales	Pseudonocardiaceae	Pseudonocardiaceae_unclassified
Otu001722	Bacteria	Actinobacteriota	Thermoleophilia	Solirubrobacterales	Solirubrobacteraceae	Solirubrobacteraceae_unclassified
Otu001724	Bacteria	Proteobacteria	Alphaproteobacteria	Acetobacterales	Acetobacteraceae	Roseomonas
Otu001725	Bacteria	Bacteroidota	Bacteroidia	Chitinophagales	Chitinophagaceae	Chitinophaga
Otu001726	Bacteria	Proteobacteria	Gammaproteobacteria	Burkholderiales	Comamonadaceae	Comamonadaceae_unclassified
Otu001727	Bacteria	Actinobacteriota	Thermoleophilia	Gaiellales	Gaiellaceae	Gaiella
Otu001728	Bacteria	Acidobacteriota	Acidobacteriae	Bryobacterales	Bryobacteraceae	Bryobacter
Otu001729	Bacteria	Proteobacteria	Alphaproteobacteria	Caulobacterales	Caulobacteraceae	Caulobacteraceae_unclassified
Otu001730	Bacteria	Chloroflexi	Ktedonobacteria	Ktedonobacterales	Ktedonobacteraceae	Ktedonobacteraceae_unclassified
Otu001731	Bacteria	Actinobacteriota	Acidimicrobiia	Microtrichales	Microtrichales_unclassified	Microtrichales_unclassified
Otu001732	Bacteria	Bacteroidota	Bacteroidia	Chitinophagales	Chitinophagaceae	uncultured
Otu001733	Bacteria	Proteobacteria	Gammaproteobacteria	Xanthomonadales	Xanthomonadaceae	Thermomonas
Otu001734	Bacteria	Actinobacteriota	Actinobacteria	Micromonosporales	Micromonosporaceae	Micromonosporaceae_unclassified
Otu001735	Bacteria	Proteobacteria	Gammaproteobacteria	Burkholderiales	Comamonadaceae	Comamonadaceae_unclassified
Otu001736	Bacteria	Actinobacteriota	MB-A2-108	MB-A2-108_or	MB-A2-108_fa	MB-A2-108_ge
Otu001737	Bacteria	Proteobacteria	Gammaproteobacteria	Gammaproteobacteria_unclassified	Gammaproteobacteria_unclassified	Gammaproteobacteria_unclassified
Otu001738	Bacteria	Acidobacteriota	Vicinamibacteria	Vicinamibacterales	uncultured	uncultured_ge
Otu001739	Bacteria	Proteobacteria	Gammaproteobacteria	Diplorickettsiales	Diplorickettsiaceae	Rickettsiella
Otu001740	Bacteria	Proteobacteria	Gammaproteobacteria	Burkholderiales	SC-I-84	SC-I-84_ge
Otu001741	Bacteria	Proteobacteria	Gammaproteobacteria	Burkholderiales	Comamonadaceae	Pelomonas
Otu001743	Bacteria	Myxococcota	Polyangia	Polyangiales	BIrii41	BIrii41_ge
Otu001744	Bacteria	Chloroflexi	AD3	AD3_or	AD3_fa	AD3_ge
Otu001745	Bacteria	Myxococcota	Polyangia	Polyangiales	BIrii41	BIrii41_ge
Otu001746	Bacteria	Acidobacteriota	Vicinamibacteria	Vicinamibacterales	uncultured	uncultured_ge
Otu001747	Bacteria	Actinobacteriota	Thermoleophilia	Thermoleophilia_unclassified	Thermoleophilia_unclassified	Thermoleophilia_unclassified
Otu001748	Bacteria	Acidobacteriota	Vicinamibacteria	Vicinamibacterales	uncultured	uncultured_ge
Otu001749	Bacteria	Actinobacteriota	Thermoleophilia	Gaiellales	Gaiellales_unclassified	Gaiellales_unclassified
Otu001750	Bacteria	Actinobacteriota	Thermoleophilia	Gaiellales	uncultured	uncultured_ge
Otu001751	Bacteria	Acidobacteriota	Blastocatellia	Pyrinomonadales	Pyrinomonadaceae	RB41
Otu001752	Bacteria	Proteobacteria	Alphaproteobacteria	Elsterales	Elsteraceae	uncultured
Otu001753	Bacteria	Proteobacteria	Alphaproteobacteria	Acetobacterales	Acetobacteraceae	uncultured
Otu001754	Bacteria	Actinobacteriota	Actinobacteria	Pseudonocardiales	Pseudonocardiaceae	Pseudonocardiaceae_unclassified
Otu001755	Bacteria	Acidobacteriota	Vicinamibacteria	Vicinamibacterales	uncultured	uncultured_ge
Otu001756	Bacteria	Proteobacteria	Alphaproteobacteria	Rhizobiales	Beijerinckiaceae	Camelimonas
Otu001757	Bacteria	Proteobacteria	Gammaproteobacteria	Xanthomonadales	Rhodanobacteraceae	Rhodanobacteraceae_unclassified
Otu001758	Bacteria	Chloroflexi	Ktedonobacteria	Ktedonobacterales	Ktedonobacteraceae	Ktedonobacteraceae_unclassified
Otu001759	Bacteria	Acidobacteriota	Vicinamibacteria	Vicinamibacterales	uncultured	uncultured_ge	100)
Otu001760	Bacteria	Acidobacteriota	Acidobacteriae	Acidobacteriales	Acidobacteriaceae_	Acidobacteriaceae_
Otu001761	Bacteria	Proteobacteria	Alphaproteobacteria	Elsterales	uncultured	uncultured_ge
Otu001762	Bacteria	Gemmatimonadota	Gemmatimonadetes	Gemmatimonadales	Gemmatimonadaceae	uncultured
Otu001763	Bacteria	Proteobacteria	Gammaproteobacteria	Xanthomonadales	Xanthomonadaceae	Xanthomonadaceae_unclassified
Otu001764	Bacteria	Actinobacteriota	Thermoleophilia	Gaiellales	Gaiellales_unclassified	Gaiellales_unclassified
Otu001765	Bacteria	Actinobacteriota	Acidimicrobiia	uncultured	uncultured_fa	uncultured_ge
Otu001766	Bacteria	Actinobacteriota	MB-A2-108	MB-A2-108_or	MB-A2-108_fa	MB-A2-108_ge
Otu001767	Bacteria	Firmicutes	Bacilli	Bacillales	Bacillaceae	Bacillaceae_ge
Otu001768	Bacteria	Proteobacteria	Gammaproteobacteria	Steroidobacterales	Steroidobacteraceae	uncultured
Otu001769	Bacteria	Proteobacteria	Gammaproteobacteria	Burkholderiales	Oxalobacteraceae	Oxalobacteraceae_unclassified
Otu001770	Bacteria	Chloroflexi	Ktedonobacteria	Ktedonobacterales	Ktedonobacteraceae	G12-WMSP1
Otu001771	Bacteria	Methylomirabilota	Methylomirabilia	Rokubacteriales	Rokubacteriales_fa	Rokubacteriales_ge
Otu001772	Bacteria	Gemmatimonadota	Gemmatimonadetes	Gemmatimonadales	Gemmatimonadaceae	Gemmatimonas
Otu001773	Bacteria	Actinobacteriota	Acidimicrobiia	Microtrichales	Microtrichales_unclassified	Microtrichales_unclassified
Otu001774	Bacteria	Proteobacteria	Alphaproteobacteria	Reyranellales	Reyranellaceae	Reyranella
Otu001775	Bacteria	Acidobacteriota	Acidobacteriae	Bryobacterales	Bryobacteraceae	Bryobacter
Otu001776	Bacteria	Chloroflexi	Chloroflexia	Thermomicrobiales	JG30-KF-CM45	JG30-KF-CM45_ge
Otu001777	Bacteria	Chloroflexi	Dehalococcoidia	S085	S085_fa	S085_ge
Otu001778	Bacteria	Proteobacteria	Alphaproteobacteria	Rhizobiales	Devosiaceae	uncultured
Otu001779	Bacteria	Myxococcota	Myxococcia	Myxococcales	Anaeromyxobacteraceae	Anaeromyxobacter
Otu001780	Bacteria	Bacteroidota	Bacteroidia	Chitinophagales	Chitinophagaceae	Puia
Otu001781	Bacteria	Actinobacteriota	Thermoleophilia	Gaiellales	uncultured	uncultured_ge
Otu001782	Bacteria	Bacteroidota	Bacteroidia	Sphingobacteriales	Sphingobacteriaceae	Mucilaginibacter
Otu001783	Bacteria	Bacteroidota	Bacteroidia	Chitinophagales	Chitinophagaceae	Terrimonas
Otu001784	Bacteria	Acidobacteriota	Vicinamibacteria	Vicinamibacterales	uncultured	uncultured_ge
Otu001785	Bacteria	Chloroflexi	TK10	TK10_or	TK10_fa	TK10_ge
Otu001786	Bacteria	Proteobacteria	Alphaproteobacteria	Caulobacterales	Caulobacteraceae	Brevundimonas
Otu001787	Bacteria	Gemmatimonadota	Gemmatimonadetes	Gemmatimonadales	Gemmatimonadaceae	Gemmatimonadaceae_unclassified
Otu001788	Bacteria	Actinobacteriota	Acidimicrobiia	Microtrichales	uncultured	uncultured_ge
Otu001789	Bacteria	Acidobacteriota	Vicinamibacteria	Subgroup_17	Subgroup_17_fa	Subgroup_17_ge
Otu001790	Bacteria	Actinobacteriota	Actinobacteria	Pseudonocardiales	Pseudonocardiaceae	Actinomycetospora
Otu001791	Bacteria	Acidobacteriota	Vicinamibacteria	Vicinamibacterales	uncultured	uncultured_ge
Otu001792	Bacteria	Gemmatimonadota	Gemmatimonadetes	Gemmatimonadales	Gemmatimonadaceae	uncultured
Otu001793	Bacteria	Chloroflexi	Chloroflexia	Thermomicrobiales	JG30-KF-CM45	JG30-KF-CM45_ge
Otu001794	Bacteria	Acidobacteriota	Vicinamibacteria	Vicinamibacterales	uncultured	uncultured_ge
Otu001795	Bacteria	Cyanobacteria	Sericytochromatia	Sericytochromatia_or	Sericytochromatia_fa	Sericytochromatia_ge
Otu001796	Bacteria	Chloroflexi	Ktedonobacteria	C0119	C0119_fa	C0119_ge
Otu001797	Bacteria	Chloroflexi	Chloroflexia	Chloroflexales	Roseiflexaceae	uncultured
Otu001798	Bacteria	Actinobacteriota	Acidimicrobiia	IMCC26256	IMCC26256_fa	IMCC26256_ge
Otu001799	Bacteria	Chloroflexi	Anaerolineae	Caldilineales	Caldilineaceae	uncultured
Otu001800	Bacteria	Latescibacterota	Latescibacterota_cl	Latescibacterota_or	Latescibacterota_fa	Latescibacterota_ge
Otu001801	Bacteria	Actinobacteriota	Thermoleophilia	Gaiellales	uncultured	uncultured_ge
Otu001802	Bacteria	Proteobacteria	Gammaproteobacteria	Burkholderiales	Oxalobacteraceae	Noviherbaspirillum
Otu001803	Bacteria	Proteobacteria	Gammaproteobacteria	Burkholderiales	Methylophilaceae	Methylotenera
Otu001804	Bacteria	Firmicutes	Bacilli	Bacillales	Planococcaceae	Domibacillus
Otu001805	Bacteria	Acidobacteriota	Acidobacteriae	Bryobacterales	Bryobacteraceae	Bryobacter
Otu001806	Bacteria	Acidobacteriota	Acidobacteriae	Acidobacteriales	Koribacteraceae	Candidatus_Koribacter
Otu001807	Bacteria	Proteobacteria	Gammaproteobacteria	Burkholderiales	A21b	A21b_ge
Otu001808	Bacteria	Acidobacteriota	Blastocatellia	45985	11-24_fa	11-24_ge
Otu001809	Bacteria	Bacteria_unclassified	Bacteria_unclassified	Bacteria_unclassified	Bacteria_unclassified	Bacteria_unclassified
Otu001810	Bacteria	Myxococcota	Polyangia	Haliangiales	Haliangiaceae	Haliangium
Otu001811	Bacteria	Actinobacteriota	Thermoleophilia	Gaiellales	uncultured	uncultured_ge
Otu001812	Bacteria	Proteobacteria	Alphaproteobacteria	Rhizobiales	uncultured	uncultured_ge
Otu001813	Bacteria	Actinobacteriota	Acidimicrobiia	Microtrichales	Microtrichaceae	uncultured
Otu001815	Bacteria	Firmicutes	Bacilli	Paenibacillales	Paenibacillaceae	Paenibacillus
Otu001816	Bacteria	Actinobacteriota	Actinobacteria	Micrococcales	Microbacteriaceae	Agrococcus
Otu001817	Bacteria	Acidobacteriota	Holophagae	Subgroup_7	Subgroup_7_fa	Subgroup_7_ge
Otu001818	Bacteria	Actinobacteriota	Acidimicrobiia	Microtrichales	Ilumatobacteraceae	CL500-29_marine_group
Otu001820	Bacteria	Chloroflexi	Chloroflexia	Chloroflexales	Roseiflexaceae	uncultured
Otu001821	Bacteria	Myxococcota	Myxococcia	Myxococcales	Myxococcaceae	P3OB-42
Otu001822	Bacteria	Bacteroidota	Bacteroidia	Flavobacteriales	Flavobacteriaceae	Flavobacterium
Otu001823	Bacteria	Actinobacteriota	Acidimicrobiia	Microtrichales	uncultured	uncultured_ge
Otu001824	Bacteria	Chloroflexi	OLB14	OLB14_or	OLB14_fa	OLB14_ge
Otu001825	Bacteria	Actinobacteriota	Actinobacteria	Corynebacteriales	Nocardiaceae	Rhodococcus
Otu001826	Bacteria	Actinobacteriota	Actinobacteria	Propionibacteriales	Nocardioidaceae	Nocardioides
Otu001827	Bacteria	Acidobacteriota	Acidobacteriae	Acidobacteriales	uncultured	uncultured_ge
Otu001828	Bacteria	Chloroflexi	Chloroflexia	Chloroflexales	Roseiflexaceae	uncultured
Otu001829	Bacteria	Chloroflexi	JG30-KF-CM66	JG30-KF-CM66_or	JG30-KF-CM66_fa	JG30-KF-CM66_ge
Otu001830	Bacteria	Verrucomicrobiota	Verrucomicrobiae	Pedosphaerales	Pedosphaeraceae	uncultured
Otu001831	Bacteria	Chloroflexi	TK10	TK10_or	TK10_fa	TK10_ge
Otu001832	Bacteria	Proteobacteria	Gammaproteobacteria	Burkholderiales	Oxalobacteraceae	Duganella
Otu001833	Bacteria	Firmicutes	Bacilli	Paenibacillales	Paenibacillaceae	Paenibacillaceae_unclassified
Otu001834	Bacteria	Proteobacteria	Gammaproteobacteria	Burkholderiales	Oxalobacteraceae	Oxalobacteraceae_unclassified
Otu001835	Bacteria	Verrucomicrobiota	Verrucomicrobiae	Chthoniobacterales	Chthoniobacteraceae	Candidatus_Udaeobacter
Otu001837	Bacteria	Chloroflexi	KD4-96	KD4-96_or	KD4-96_fa	KD4-96_ge
Otu001838	Bacteria	Acidobacteriota	Blastocatellia	45985	11-24_fa	11-24_ge
Otu001839	Bacteria	Actinobacteriota	Thermoleophilia	Gaiellales	uncultured	uncultured_ge
Otu001840	Bacteria	Chloroflexi	Ktedonobacteria	C0119	C0119_fa	C0119_ge
Otu001841	Bacteria	Myxococcota	Polyangia	Polyangiales	Polyangiaceae	Pajaroellobacter
Otu001842	Bacteria	Bacteroidota	Bacteroidia	Chitinophagales	Chitinophagaceae	uncultured
Otu001843	Bacteria	Bacteroidota	Bacteroidia	Chitinophagales	Chitinophagaceae	Flavisolibacter
Otu001844	Bacteria	Actinobacteriota	Actinobacteria	Micrococcales	Microbacteriaceae	Herbiconiux
Otu001845	Bacteria	Proteobacteria	Gammaproteobacteria	Burkholderiales	SC-I-84	SC-I-84_ge
Otu001846	Bacteria	Myxococcota	Polyangia	Polyangiales	Polyangiaceae	Pajaroellobacter
Otu001847	Bacteria	Proteobacteria	Alphaproteobacteria	Caulobacterales	Caulobacteraceae	Asticcacaulis
Otu001848	Bacteria	Bdellovibrionota	Bdellovibrionia	Bdellovibrionales	Bdellovibrionaceae	OM27_clade
Otu001849	Bacteria	Acidobacteriota	Subgroup_5	Subgroup_5_or	Subgroup_5_fa	Subgroup_5_ge
Otu001850	Bacteria	Proteobacteria	Gammaproteobacteria	Burkholderiales	Nitrosomonadaceae	Ellin6067
Otu001851	Bacteria	Proteobacteria	Alphaproteobacteria	Rhodospirillales	Rhodospirillaceae	uncultured
Otu001852	Bacteria	Acidobacteriota	Subgroup_5	Subgroup_5_or	Subgroup_5_fa	Subgroup_5_ge
Otu001853	Bacteria	RCP2-54	RCP2-54_cl	RCP2-54_or	RCP2-54_fa	RCP2-54_ge
Otu001854	Bacteria	Proteobacteria	Alphaproteobacteria	Elsterales	uncultured	uncultured_ge
Otu001855	Bacteria	Chloroflexi	JG30-KF-CM66	JG30-KF-CM66_or	JG30-KF-CM66_fa	JG30-KF-CM66_ge
Otu001856	Bacteria	Chloroflexi	Chloroflexia	Kallotenuales	AKIW781	AKIW781_ge
Otu001857	Bacteria	Bacteroidota	Bacteroidia	Chitinophagales	Chitinophagaceae	Terrimonas
Otu001858	Bacteria	Actinobacteriota	Actinobacteria	Frankiales	Geodermatophilaceae	Geodermatophilus
Otu001859	Bacteria	Bacteroidota	Bacteroidia	Chitinophagales	Chitinophagaceae	Sediminibacterium
Otu001860	Bacteria	Bdellovibrionota	Oligoflexia	Oligoflexales	Oligoflexaceae	Oligoflexus
Otu001861	Bacteria	Proteobacteria	Gammaproteobacteria	Xanthomonadales	Xanthomonadaceae	Lysobacter
Otu001862	Bacteria	Bacteroidota	Bacteroidia	Flavobacteriales	Flavobacteriaceae	Flavobacterium
Otu001863	Bacteria	Proteobacteria	Gammaproteobacteria	Gammaproteobacteria_Incertae_Sedis	Unknown_Family	Acidibacter
Otu001864	Bacteria	Desulfobacterota	Desulfuromonadia	Geobacterales	Geobacteraceae	Geobacter
Otu001865	Bacteria	Bacteroidota	Bacteroidia	Chitinophagales	Chitinophagaceae	Ferruginibacter
Otu001866	Bacteria	Proteobacteria	Alphaproteobacteria	Caulobacterales	Caulobacteraceae	uncultured
Otu001867	Bacteria	Acidobacteriota	Vicinamibacteria	Vicinamibacterales	uncultured	uncultured_ge
Otu001868	Bacteria	Proteobacteria	Gammaproteobacteria	Xanthomonadales	Xanthomonadaceae	Pseudoxanthomonas
Otu001869	Bacteria	Actinobacteriota	Thermoleophilia	Gaiellales	uncultured	uncultured_ge
Otu001870	Bacteria	Chloroflexi	Ktedonobacteria	Ktedonobacterales	Ktedonobacteraceae	1921-3
Otu001871	Bacteria	Patescibacteria	Saccharimonadia	Saccharimonadales	LWQ8	LWQ8_ge
Otu001872	Bacteria	Firmicutes	Clostridia	Clostridiales	Clostridiaceae	Clostridium_sensu_stricto_13
Otu001873	Bacteria	Proteobacteria	Alphaproteobacteria	Caulobacterales	Hyphomonadaceae	SWB02
Otu001874	Bacteria	Proteobacteria	Alphaproteobacteria	Acetobacterales	Acetobacteraceae	Roseomonas
Otu001875	Bacteria	Proteobacteria	Alphaproteobacteria	Sphingomonadales	Sphingomonadaceae	Sphingomonadaceae_unclassified
Otu001876	Bacteria	Firmicutes	Bacilli	Paenibacillales	Paenibacillaceae	Paenibacillus
Otu001877	Bacteria	Proteobacteria	Gammaproteobacteria	Burkholderiales	Nitrosomonadaceae	mle1-7
Otu001878	Bacteria	WPS-2	WPS-2_cl	WPS-2_or	WPS-2_fa	WPS-2_ge
Otu001879	Bacteria	Chloroflexi	Chloroflexia	Thermomicrobiales	JG30-KF-CM45	JG30-KF-CM45_ge
Otu001880	Bacteria	Chloroflexi	Chloroflexia	Chloroflexales	Chloroflexales_unclassified	Chloroflexales_unclassified
Otu001881	Bacteria	Proteobacteria	Alphaproteobacteria	Tistrellales	Geminicoccaceae	uncultured
Otu001882	Bacteria	Gemmatimonadota	Gemmatimonadetes	Gemmatimonadales	Gemmatimonadaceae	Gemmatimonas
Otu001883	Bacteria	Proteobacteria	Alphaproteobacteria	Sphingomonadales	Sphingomonadaceae	Sphingomonas
Otu001884	Bacteria	Actinobacteriota	Actinobacteria	Frankiales	Frankiales_unclassified	Frankiales_unclassified
Otu001885	Bacteria	Gemmatimonadota	Gemmatimonadetes	Gemmatimonadales	Gemmatimonadaceae	Gemmatimonadaceae_unclassified
Otu001886	Bacteria	Actinobacteriota	Actinobacteria	Micromonosporales	Micromonosporaceae	Micromonosporaceae_unclassified
Otu001887	Bacteria	Proteobacteria	Alphaproteobacteria	Sphingomonadales	Sphingomonadaceae	Sphingopyxis
Otu001888	Bacteria	Actinobacteriota	Thermoleophilia	Solirubrobacterales	67-14	67-14_ge
Otu001889	Bacteria	Actinobacteriota	MB-A2-108	MB-A2-108_or	MB-A2-108_fa	MB-A2-108_ge
Otu001890	Bacteria	Proteobacteria	Gammaproteobacteria	Burkholderiales	SC-I-84	SC-I-84_ge
Otu001891	Bacteria	Acidobacteriota	Acidobacteriae	Bryobacterales	Bryobacteraceae	Bryobacter
Otu001892	Bacteria	Chloroflexi	Chloroflexi_unclassified	Chloroflexi_unclassified	Chloroflexi_unclassified	Chloroflexi_unclassified
Otu001893	Bacteria	Actinobacteriota	Thermoleophilia	Solirubrobacterales	67-14	67-14_ge
Otu001894	Bacteria	Myxococcota	Polyangia	Polyangiales	Polyangiaceae	Aetherobacter
Otu001895	Bacteria	Firmicutes	Bacilli	Paenibacillales	Paenibacillaceae	Paenibacillus
Otu001896	Bacteria	Acidobacteriota	Blastocatellia	Blastocatellales	Blastocatellaceae	Blastocatellaceae_unclassified
Otu001897	Bacteria	Acidobacteriota	Vicinamibacteria	Subgroup_17	Subgroup_17_fa	Subgroup_17_ge
Otu001898	Bacteria	Actinobacteriota	Actinobacteria	Micromonosporales	Micromonosporaceae	Micromonosporaceae_unclassified
Otu001899	Bacteria	Chloroflexi	Chloroflexia	Kallotenuales	AKIW781	AKIW781_ge
Otu001900	Bacteria	Chloroflexi	TK10	TK10_or	TK10_fa	TK10_ge
Otu001901	Bacteria	Actinobacteriota	Thermoleophilia	Solirubrobacterales	Solirubrobacteraceae	Conexibacter
Otu001902	Bacteria	Acidobacteriota	Acidobacteriae	Acidobacteriales	Acidobacteriaceae_	Occallatibacter
Otu001903	Bacteria	Actinobacteriota	Thermoleophilia	Solirubrobacterales	Solirubrobacteraceae	Conexibacter
Otu001904	Bacteria	Gemmatimonadota	Gemmatimonadetes	Gemmatimonadales	Gemmatimonadaceae	Gemmatimonas
Otu001905	Bacteria	Chloroflexi	Chloroflexia	Thermomicrobiales	JG30-KF-CM45	JG30-KF-CM45_ge
Otu001906	Bacteria	Myxococcota	Myxococcia	Myxococcales	Myxococcaceae	Myxococcus
Otu001907	Bacteria	Gemmatimonadota	Gemmatimonadetes	Gemmatimonadales	Gemmatimonadaceae	Gemmatimonadaceae_unclassified
Otu001908	Bacteria	Proteobacteria	Alphaproteobacteria	Acetobacterales	Acetobacteraceae	Acetobacteraceae_unclassified
Otu001909	Bacteria	Chloroflexi	Ktedonobacteria	Ktedonobacterales	Ktedonobacteraceae	Ktedonobacteraceae_unclassified
Otu001910	Bacteria	Proteobacteria	Alphaproteobacteria	Elsterales	uncultured	uncultured_ge
Otu001911	Bacteria	Bacteroidota	Bacteroidia	Chitinophagales	Chitinophagaceae	Edaphobaculum
Otu001913	Bacteria	Proteobacteria	Alphaproteobacteria	Elsterales	uncultured	uncultured_ge
Otu001914	Bacteria	Bacteroidota	Bacteroidia	Chitinophagales	Chitinophagaceae	Puia
Otu001915	Bacteria	Firmicutes	Bacilli	Bacillales	Bacillaceae	Bacillus
Otu001916	Bacteria	Myxococcota	Polyangia	Haliangiales	Haliangiaceae	Haliangium
Otu001917	Bacteria	Acidobacteriota	Vicinamibacteria	Vicinamibacterales	Vicinamibacteraceae	Vicinamibacteraceae_ge
Otu001918	Bacteria	Firmicutes	Bacilli	Bacillales	Bacillaceae	Bacillaceae_unclassified
Otu001919	Bacteria	Proteobacteria	Gammaproteobacteria	Xanthomonadales	Rhodanobacteraceae	Rhodanobacteraceae_unclassified
Otu001920	Bacteria	Actinobacteriota	Acidimicrobiia	Microtrichales	uncultured	uncultured_ge
Otu001921	Bacteria	Acidobacteriota	Vicinamibacteria	Vicinamibacterales	uncultured	uncultured_ge
Otu001922	Bacteria	Acidobacteriota	Vicinamibacteria	Vicinamibacterales	Vicinamibacteraceae	Vicinamibacteraceae_ge
Otu001923	Bacteria	Chloroflexi	Ktedonobacteria	Ktedonobacterales	Ktedonobacteraceae	1959-1
Otu001924	Bacteria	Bacteroidota	Bacteroidia	Chitinophagales	Chitinophagaceae	Parafilimonas
Otu001925	Bacteria	Entotheonellaeota	Entotheonellia	Entotheonellales	Entotheonellaceae	Entotheonellaceae_ge
Otu001926	Bacteria	Bacteroidota	Bacteroidia	Chitinophagales	Chitinophagaceae	Aurantisolimonas
Otu001927	Bacteria	Chloroflexi	Anaerolineae	Caldilineales	Caldilineaceae	uncultured
Otu001928	Bacteria	Actinobacteriota	Acidimicrobiia	IMCC26256	IMCC26256_fa	IMCC26256_ge
Otu001929	Bacteria	Actinobacteriota	Actinobacteria	Micrococcales	Microbacteriaceae	Microbacterium
Otu001930	Bacteria	Actinobacteriota	Acidimicrobiia	Microtrichales	uncultured	uncultured_ge
Otu001931	Bacteria	Acidobacteriota	Vicinamibacteria	Vicinamibacterales	uncultured	uncultured_ge
Otu001932	Bacteria	Firmicutes	Bacilli	Paenibacillales	Paenibacillaceae	Cohnella
Otu001933	Bacteria	Bacteroidota	Bacteroidia	Chitinophagales	Chitinophagaceae	Chitinophagaceae_unclassified
Otu001934	Bacteria	Acidobacteriota	Vicinamibacteria	Vicinamibacterales	uncultured	uncultured_ge
Otu001935	Bacteria	Firmicutes	Clostridia	Clostridiales	Clostridiaceae	Clostridium_sensu_stricto_1
Otu001936	Bacteria	Proteobacteria	Gammaproteobacteria	Burkholderiales	SC-I-84	SC-I-84_ge
Otu001937	Bacteria	Actinobacteriota	Thermoleophilia	Solirubrobacterales	Solirubrobacteraceae	Patulibacter
Otu001938	Bacteria	Acidobacteriota	Blastocatellia	Pyrinomonadales	Pyrinomonadaceae	RB41
Otu001939	Bacteria	Proteobacteria	Alphaproteobacteria	Rhizobiales	Devosiaceae	Devosiaceae_unclassified
Otu001940	Bacteria	Proteobacteria	Alphaproteobacteria	uncultured	uncultured_fa	uncultured_ge
Otu001941	Bacteria	Acidobacteriota	Vicinamibacteria	Vicinamibacterales	uncultured	uncultured_ge
Otu001942	Bacteria	Proteobacteria	Alphaproteobacteria	Rhizobiales	Rhizobiales_unclassified	Rhizobiales_unclassified
Otu001943	Bacteria	Chloroflexi	Ktedonobacteria	B12-WMSP1	B12-WMSP1_fa	B12-WMSP1_ge
Otu001944	Bacteria	Acidobacteriota	Acidobacteriae	Bryobacterales	Bryobacteraceae	Bryobacter
Otu001945	Bacteria	Chloroflexi	Chloroflexia	Kallotenuales	AKIW781	AKIW781_ge
Otu001946	Bacteria	Verrucomicrobiota	Verrucomicrobiae	Pedosphaerales	Pedosphaeraceae	Pedosphaera
Otu001947	Bacteria	Actinobacteriota	Thermoleophilia	Solirubrobacterales	Solirubrobacterales_unclassified	Solirubrobacterales_unclassified
Otu001948	Bacteria	Myxococcota	Polyangia	Polyangiales	Sandaracinaceae	uncultured
Otu001949	Bacteria	Gemmatimonadota	Gemmatimonadetes	Gemmatimonadales	Gemmatimonadaceae	uncultured
Otu001950	Bacteria	Acidobacteriota	Vicinamibacteria	Vicinamibacterales	uncultured	uncultured_ge
Otu001951	Bacteria	Acidobacteriota	Vicinamibacteria	Vicinamibacterales	Vicinamibacteraceae	Vicinamibacteraceae_ge
Otu001952	Bacteria	Gemmatimonadota	Gemmatimonadetes	Gemmatimonadales	Gemmatimonadaceae	Gemmatimonas
Otu001953	Bacteria	Chloroflexi	Ktedonobacteria	Ktedonobacterales	Ktedonobacteraceae	G12-WMSP1
Otu001954	Bacteria	Actinobacteriota	Actinobacteria	Micrococcales	Microbacteriaceae	Humibacter
Otu001955	Bacteria	Proteobacteria	Gammaproteobacteria	Xanthomonadales	Rhodanobacteraceae	Rhodanobacteraceae_unclassified
Otu001956	Bacteria	Bacteria_unclassified	Bacteria_unclassified	Bacteria_unclassified	Bacteria_unclassified	Bacteria_unclassified
Otu001957	Bacteria	Acidobacteriota	Blastocatellia	Pyrinomonadales	Pyrinomonadaceae	RB41
Otu001958	Bacteria	Actinobacteriota	Actinobacteria	Streptosporangiales	Thermomonosporaceae	Actinomadura
Otu001959	Bacteria	Acidobacteriota	Thermoanaerobaculia	Thermoanaerobaculales	Thermoanaerobaculaceae	Subgroup_10
Otu001960	Bacteria	Cyanobacteria	Cyanobacteriia	Cyanobacteriales	Nostocaceae	Tolypothrix
Otu001961	Bacteria	Verrucomicrobiota	Verrucomicrobiae	Chthoniobacterales	Chthoniobacteraceae	Candidatus_Udaeobacter
Otu001962	Bacteria	Gemmatimonadota	Gemmatimonadetes	Gemmatimonadales	Gemmatimonadaceae	Gemmatimonadaceae_unclassified
Otu001963	Bacteria	Actinobacteriota	Thermoleophilia	Gaiellales	uncultured	uncultured_ge
Otu001965	Bacteria	Actinobacteriota	Thermoleophilia	Solirubrobacterales	Solirubrobacteraceae	Solirubrobacteraceae_unclassified
Otu001966	Bacteria	Chloroflexi	Chloroflexia	Thermomicrobiales	JG30-KF-CM45	JG30-KF-CM45_ge
Otu001967	Bacteria	Desulfobacterota	uncultured	uncultured_or	uncultured_fa	uncultured_ge
Otu001968	Bacteria	Chloroflexi	Ktedonobacteria	C0119	C0119_fa	C0119_ge
Otu001969	Bacteria	Deinococcota	Deinococci	Deinococcales	Deinococcaceae	Deinococcus
Otu001970	Bacteria	Chloroflexi	Chloroflexia	Thermomicrobiales	Thermomicrobiales_unclassified	Thermomicrobiales_unclassified
Otu001971	Bacteria	RCP2-54	RCP2-54_cl	RCP2-54_or	RCP2-54_fa	RCP2-54_ge
Otu001972	Bacteria	Fibrobacterota	Fibrobacteria	Fibrobacterales	Fibrobacteraceae	possible_genus_04
Otu001973	Bacteria	Proteobacteria	Alphaproteobacteria	Rhizobiales	Rhizobiaceae	Mesorhizobium
Otu001974	Bacteria	Myxococcota	Polyangia	Haliangiales	Haliangiaceae	Haliangium
Otu001975	Bacteria	Actinobacteriota	MB-A2-108	MB-A2-108_or	MB-A2-108_fa	MB-A2-108_ge
Otu001976	Bacteria	Actinobacteriota	Acidimicrobiia	IMCC26256	IMCC26256_fa	IMCC26256_ge
Otu001977	Bacteria	Proteobacteria	Gammaproteobacteria	Enterobacterales	Enterobacterales_unclassified	Enterobacterales_unclassified
Otu001978	Bacteria	Actinobacteriota	Actinobacteria	Propionibacteriales	Nocardioidaceae	Actinopolymorpha
Otu001979	Bacteria	Bacteroidota	Bacteroidia	Sphingobacteriales	Sphingobacteriaceae	Pedobacter
Otu001980	Bacteria	Actinobacteriota	Acidimicrobiia	Microtrichales	Microtrichales_unclassified	Microtrichales_unclassified
Otu001981	Bacteria	Actinobacteriota	Acidimicrobiia	Microtrichales	Ilumatobacteraceae	CL500-29_marine_group
Otu001982	Bacteria	Actinobacteriota	Acidimicrobiia	Microtrichales	Iamiaceae	Iamia
Otu001983	Bacteria	Actinobacteriota	Thermoleophilia	Solirubrobacterales	Solirubrobacteraceae	Conexibacter
Otu001984	Bacteria	Actinobacteriota	Actinobacteria	Propionibacteriales	Nocardioidaceae	Nocardioides
Otu001985	Bacteria	Actinobacteriota	Actinobacteria	Frankiales	Geodermatophilaceae	Geodermatophilaceae_unclassified
Otu001986	Bacteria	Firmicutes	Bacilli	Bacillales	Bacillaceae	Bacillaceae_unclassified
Otu001987	Bacteria	Gemmatimonadota	Gemmatimonadetes	Gemmatimonadales	Gemmatimonadaceae	uncultured
Otu001988	Bacteria	Proteobacteria	Alphaproteobacteria	Elsterales	uncultured	uncultured_ge
Otu001989	Bacteria	Acidobacteriota	Vicinamibacteria	Vicinamibacterales	uncultured	uncultured_ge
Otu001990	Bacteria	Proteobacteria	Gammaproteobacteria	Legionellales	Legionellaceae	Legionella
Otu001991	Bacteria	Chloroflexi	Ktedonobacteria	Ktedonobacterales	Ktedonobacteraceae	Ktedonobacteraceae_unclassified
Otu001992	Bacteria	Bacteroidota	Bacteroidia	Flavobacteriales	Weeksellaceae	Chryseobacterium
Otu001993	Bacteria	Actinobacteriota	Thermoleophilia	Gaiellales	Gaiellales_unclassified	Gaiellales_unclassified
Otu001994	Bacteria	Proteobacteria	Alphaproteobacteria	Elsterales	uncultured	uncultured_ge
Otu001995	Bacteria	Actinobacteriota	MB-A2-108	MB-A2-108_or	MB-A2-108_fa	MB-A2-108_ge
Otu001996	Bacteria	Acidobacteriota	Vicinamibacteria	Vicinamibacterales	uncultured	uncultured_ge
Otu001998	Bacteria	Actinobacteriota	Actinobacteria	Corynebacteriales	Mycobacteriaceae	Mycobacterium
Otu001999	Bacteria	Chloroflexi	Ktedonobacteria	Ktedonobacterales	Ktedonobacteraceae	Ktedonobacteraceae_unclassified
Otu002000	Bacteria	Patescibacteria	Saccharimonadia	Saccharimonadales	Saccharimonadales_unclassified	Saccharimonadales_unclassified
Otu002001	Bacteria	Actinobacteriota	Actinobacteria	Frankiales	Geodermatophilaceae	Geodermatophilus
Otu002002	Bacteria	Chloroflexi	Ktedonobacteria	Ktedonobacterales	Ktedonobacteraceae	Ktedonobacteraceae_unclassified
Otu002003	Bacteria	Actinobacteriota	Thermoleophilia	Gaiellales	Gaiellales_unclassified	Gaiellales_unclassified
Otu002004	Bacteria	Acidobacteriota	Vicinamibacteria	Vicinamibacterales	uncultured	uncultured_ge
Otu002005	Bacteria	Proteobacteria	Gammaproteobacteria	Gammaproteobacteria_Incertae_Sedis	Unknown_Family	Acidibacter
Otu002008	Bacteria	Actinobacteriota	Actinobacteria	Micrococcales	Promicromonosporaceae	Promicromonospora
Otu002009	Bacteria	Proteobacteria	Alphaproteobacteria	Azospirillales	Inquilinaceae	Inquilinus
Otu002012	Bacteria	Verrucomicrobiota	Verrucomicrobiae	Pedosphaerales	Pedosphaeraceae	Ellin516
Otu002013	Bacteria	Myxococcota	Polyangia	Polyangiales	Polyangiaceae	Polyangiaceae_unclassified
Otu002014	Bacteria	Nitrospirota	Nitrospiria	Nitrospirales	Nitrospiraceae	Nitrospira
Otu002015	Bacteria	Actinobacteriota	Actinobacteria	Frankiales	Sporichthyaceae	uncultured
Otu002016	Bacteria	Bdellovibrionota	Oligoflexia	0319-6G20	0319-6G20_fa	0319-6G20_ge
Otu002017	Bacteria	Proteobacteria	Alphaproteobacteria	Elsterales	uncultured	uncultured_ge
Otu002018	Bacteria	Actinobacteriota	Actinobacteria	Streptomycetales	Streptomycetaceae	Streptomyces
Otu002019	Bacteria	Acidobacteriota	Vicinamibacteria	Vicinamibacterales	uncultured	uncultured_ge
Otu002020	Bacteria	Verrucomicrobiota	Verrucomicrobiae	Chthoniobacterales	Chthoniobacteraceae	Chthoniobacter
Otu002021	Bacteria	Bacteroidota	Bacteroidia	Chitinophagales	Chitinophagaceae	uncultured
Otu002022	Bacteria	Chloroflexi	Chloroflexia	Thermomicrobiales	JG30-KF-CM45	JG30-KF-CM45_ge
Otu002023	Bacteria	Proteobacteria	Alphaproteobacteria	Rhizobiales	Rhizobiales_Incertae_Sedis	Bauldia
Otu002024	Bacteria	Actinobacteriota	Actinobacteria	Micrococcales	Micrococcaceae	Sinomonas
Otu002026	Bacteria	Acidobacteriota	Vicinamibacteria	Vicinamibacterales	Vicinamibacteraceae	Vicinamibacteraceae_ge
Otu002027	Bacteria	Myxococcota	Polyangia	Polyangiales	BIrii41	BIrii41_ge
Otu002028	Bacteria	Myxococcota	Myxococcia	Myxococcales	Anaeromyxobacteraceae	Anaeromyxobacter
Otu002030	Bacteria	Proteobacteria	Alphaproteobacteria	Rhizobiales	Rhizobiales_unclassified	Rhizobiales_unclassified
Otu002031	Bacteria	Actinobacteriota	Thermoleophilia	Solirubrobacterales	Solirubrobacteraceae	Conexibacter
Otu002032	Bacteria	Myxococcota	bacteriap25	bacteriap25_or	bacteriap25_fa	bacteriap25_ge
Otu002033	Bacteria	Gemmatimonadota	Gemmatimonadetes	Gemmatimonadales	Gemmatimonadaceae	Gemmatimonas
Otu002034	Bacteria	Actinobacteriota	Actinobacteria	Micrococcales	Bogoriellaceae	Georgenia
Otu002035	Bacteria	Gemmatimonadota	Gemmatimonadetes	Gemmatimonadales	Gemmatimonadaceae	Gemmatimonadaceae_unclassified
[truncated: 32,550 more rows]

## Sheet: Fig.3DEF, Fig.5CD;FigS2B;FigS4
Source Data 2. Taxonomic information for ITS OTUs.
OTU	Kingdom	Phylum	Class	Order	Family	Genus
Otu000001	Fungi	Fungi_unclassified	Fungi_unclassified	Fungi_unclassified	Fungi_unclassified	Fungi_unclassified
Otu000002	Fungi	Ascomycota	Sordariomycetes	Hypocreales	Hypocreaceae	Trichoderma
Otu000003	Fungi	Ascomycota	Sordariomycetes	Hypocreales	Nectriaceae	Fusarium
Otu000004	Fungi	Ascomycota	Sordariomycetes	Glomerellales	Plectosphaerellaceae	Gibellulopsis
Otu000005	Fungi	Ascomycota	Sordariomycetes	Hypocreales	Nectriaceae	Fusarium
Otu000006	Fungi	Ascomycota	Sordariomycetes	Glomerellales	Plectosphaerellaceae	Plectosphaerella
Otu000007	Fungi	Ascomycota	Sordariomycetes	Sordariales	Chaetomiaceae	Chaetomiaceae_unclassified
Otu000008	Fungi	Mortierellomycota	Mortierellomycetes	Mortierellales	Mortierellaceae	Mortierellaceae_unclassified
Otu000009	Fungi	Ascomycota	Dothideomycetes	Capnodiales	Cladosporiaceae	Cladosporium
Otu000010	Fungi	Ascomycota	Sordariomycetes	Hypocreales	Nectriaceae	Fusarium
Otu000011	Fungi	Ascomycota	Sordariomycetes	Hypocreales	Bionectriaceae	Clonostachys
Otu000012	Fungi	Fungi_unclassified	Fungi_unclassified	Fungi_unclassified	Fungi_unclassified	Fungi_unclassified
Otu000013	Fungi	Ascomycota	Dothideomycetes	Pleosporales	Didymellaceae	Didymellaceae_unclassified
Otu000014	Fungi	Ascomycota	Sordariomycetes	Sordariales	Lasiosphaeriaceae	Schizothecium
Otu000015	Fungi	Fungi_phy_Incertae_sedis	Fungi_cls_Incertae_sedis	Fungi_ord_Incertae_sedis	Fungi_fam_Incertae_sedis	Globodera
Otu000016	Fungi	Ascomycota	Sordariomycetes	Hypocreales	Hypocreaceae	Trichoderma
Otu000017	Fungi	Mucoromycota	Mucoromycetes	Mucorales	Mucoraceae	Actinomucor
Otu000018	Fungi	Ascomycota	Eurotiomycetes	Chaetothyriales	Herpotrichiellaceae	Exophiala
Otu000019	Fungi	Mucoromycota	Umbelopsidomycetes	Umbelopsidales	Umbelopsidaceae	Umbelopsis
Otu000020	Fungi	Fungi_unclassified	Fungi_unclassified	Fungi_unclassified	Fungi_unclassified	Fungi_unclassified
Otu000021	Fungi	Fungi_unclassified	Fungi_unclassified	Fungi_unclassified	Fungi_unclassified	Fungi_unclassified
Otu000022	Fungi	Mortierellomycota	Mortierellomycetes	Mortierellales	Mortierellaceae	Podila
Otu000023	Fungi	Ascomycota	Sordariomycetes	Chaetosphaeriales	Chaetosphaeriaceae	Chloridium
Otu000025	Fungi	Ascomycota	Sordariomycetes	Hypocreales	Nectriaceae	Fusicolla
Otu000026	Fungi	Ascomycota	Dothideomycetes	Pleosporales	Pleosporaceae	Alternaria
Otu000027	Fungi	Ascomycota	Sordariomycetes	Sordariales	Chaetomiaceae	Chaetomiaceae_unclassified
Otu000028	Fungi	Basidiomycota	Agaricomycetes	Phallales	Phallaceae	Phallus
Otu000029	Fungi	Ascomycota	Sordariomycetes	Hypocreales	Nectriaceae	Fusarium
Otu000030	Fungi	Fungi_unclassified	Fungi_unclassified	Fungi_unclassified	Fungi_unclassified	Fungi_unclassified
Otu000031	Fungi	Ascomycota	Eurotiomycetes	Eurotiales	Aspergillaceae	Penicillium
Otu000032	Fungi	Ascomycota	Sordariomycetes	Sordariomycetes_unclassified	Sordariomycetes_unclassified	Sordariomycetes_unclassified
Otu000033	Fungi	Ascomycota	Sordariomycetes	Sordariales	Lasiosphaeriaceae	Lasiosphaeris
Otu000034	Fungi	Ascomycota	Eurotiomycetes	Eurotiales	Aspergillaceae	Talaromyces
Otu000035	Fungi	Mucoromycota	Mucoromycetes	Mucorales	Mucoraceae	Mucor
Otu000036	Fungi	Ascomycota	Sordariomycetes	Sordariales	Chaetomiaceae	Chaetomiaceae_unclassified
Otu000037	Fungi	Ascomycota	Sordariomycetes	Sordariales	Podosporaceae	Cladorrhinum
Otu000038	Fungi	Ascomycota	Sordariomycetes	Hypocreales	Nectriaceae	Fusarium
Otu000039	Fungi	unclassified	unclassified	unclassified	unclassified	unclassified
Otu000040	Fungi	Basidiomycota	Microbotryomycetes	Microbotryomycetes_ord_Incertae_sedis	Chrysozymaceae	Sampaiozyma
Otu000041	Fungi	Ascomycota	Sordariomycetes	Glomerellales	Plectosphaerellaceae	Chordomyces
Otu000042	Fungi	Mortierellomycota	Mortierellomycetes	Mortierellales	Mortierellaceae	Gamsiella
Otu000043	Fungi	Ascomycota	Sordariomycetes	Hypocreales	Hypocreales_fam_Incertae_sedis	Emericellopsis
Otu000044	Fungi	Ascomycota	Eurotiomycetes	Eurotiales	Aspergillaceae	Penicillium
Otu000045	Fungi	Ascomycota	Sordariomycetes	Hypocreales	Clavicipitaceae	Metarhizium
Otu000046	Fungi	Ascomycota	Dothideomycetes	Pleosporales	Phaeosphaeriaceae	Phaeosphaeriaceae_unclassified
Otu000047	Fungi	Mortierellomycota	Mortierellomycetes	Mortierellales	Mortierellaceae	Mortierella
Otu000048	Fungi	Ascomycota	Dothideomycetes	Pleosporales	Didymellaceae	Neoascochyta
Otu000049	Fungi	Ascomycota	Sordariomycetes	Xylariales	Amphisphaeriaceae	Microdochium
Otu000050	Fungi	Basidiomycota	Tremellomycetes	Tremellales	Rhynchogastremataceae	Papiliotrema
Otu000051	Fungi	Ascomycota	Sordariomycetes	Sordariales	Lasiosphaeriaceae	Immersiella
Otu000052	Fungi	Ascomycota	Sordariomycetes	Hypocreales	Hypocreaceae	Trichoderma
Otu000053	Fungi	Fungi_unclassified	Fungi_unclassified	Fungi_unclassified	Fungi_unclassified	Fungi_unclassified
Otu000054	Fungi	Ascomycota	Ascomycota_unclassified	Ascomycota_unclassified	Ascomycota_unclassified	Ascomycota_unclassified
Otu000055	Fungi	Fungi_unclassified	Fungi_unclassified	Fungi_unclassified	Fungi_unclassified	Fungi_unclassified
Otu000056	Fungi	Ascomycota	Sordariomycetes	Hypocreales	Hypocreaceae	Trichoderma
Otu000057	Fungi	Ascomycota	Dothideomycetes	Pleosporales	Sporormiaceae	Preussia
Otu000058	Fungi	Ascomycota	Sordariomycetes	Glomerellales	Plectosphaerellaceae	Stachylidium
Otu000059	Fungi	Basidiomycota	Agaricomycetes	Trechisporales	Hydnodontaceae	Trechispora
Otu000060	Fungi	Fungi_unclassified	Fungi_unclassified	Fungi_unclassified	Fungi_unclassified	Fungi_unclassified
Otu000062	Fungi	Fungi_unclassified	Fungi_unclassified	Fungi_unclassified	Fungi_unclassified	Fungi_unclassified
Otu000063	Fungi	Mucoromycota	Mucoromycetes	Mucorales	Mucoraceae	Mucor
Otu000064	Fungi	Ascomycota	Sordariomycetes	Hypocreales	Nectriaceae	Fusarium
Otu000065	Fungi	Ascomycota	Dothideomycetes	Pleosporales	Neopyrenochaetaceae	Neopyrenochaeta
Otu000066	Fungi	Basidiomycota	Tremellomycetes	Filobasidiales	Filobasidiaceae	Filobasidium
Otu000067	Fungi	Basidiomycota	Tremellomycetes	Filobasidiales	Piskurozymaceae	Solicoccozyma
Otu000068	Fungi	Ascomycota	Dothideomycetes	Pleosporales	Torulaceae	Torula
Otu000069	Fungi	Ascomycota	Sordariomycetes	Hypocreales	Ophiocordycipitaceae	Purpureocillium
Otu000070	Fungi	Mortierellomycota	Mortierellomycetes	Mortierellales	Mortierellaceae	Mortierella
Otu000071	Fungi	Ascomycota	Dothideomycetes	Pleosporales	Pleosporales_fam_Incertae_sedis	Aaosphaeria
Otu000072	Fungi	Basidiomycota	Agaricomycetes	Trechisporales	Trechisporales_unclassified	Trechisporales_unclassified
Otu000073	Fungi	Ascomycota	Sordariomycetes	Hypocreales	Hypocreaceae	Trichoderma
Otu000074	Fungi	Ascomycota	Sordariomycetes	Hypocreales	Hypocreales_fam_Incertae_sedis	Sesquicillium
Otu000075	Fungi	Ascomycota	Sordariomycetes	Glomerellales	Plectosphaerellaceae	Lectera
Otu000076	Fungi	Ascomycota	Sordariomycetes	Sordariales	Sordariales_fam_Incertae_sedis	Staphylotrichum
Otu000078	Fungi	Ascomycota	Sordariomycetes	Microascales	Microascaceae	Enterocarpus
Otu000079	Fungi	Ascomycota	Dothideomycetes	Pleosporales	Pleosporales_unclassified	Pleosporales_unclassified
Otu000080	Fungi	Ascomycota	Pezizomycetes	Pezizales	Pyronemataceae	Spooneromyces
Otu000081	Fungi	Ascomycota	Sordariomycetes	Glomerellales	Plectosphaerellaceae	Plectosphaerellaceae_unclassified
Otu000082	Fungi	Fungi_unclassified	Fungi_unclassified	Fungi_unclassified	Fungi_unclassified	Fungi_unclassified
Otu000083	Fungi	Basidiomycota	Agaricomycetes	Agaricales	Entolomataceae	Entoloma
Otu000084	Fungi	Ascomycota	Sordariomycetes	Myrmecridiales	Myrmecridiaceae	Myrmecridium
Otu000085	Fungi	Rozellomycota	Rozellomycotina_cls_Incertae_sedis	GS11	unclassified	unclassified
Otu000086	Fungi	Ascomycota	Sordariomycetes	Hypocreales	Clavicipitaceae	Clavicipitaceae_unclassified
Otu000087	Fungi	Ascomycota	Dothideomycetes	Pleosporales	Didymellaceae	Didymellaceae_unclassified
Otu000088	Fungi	Ascomycota	Ascomycota_unclassified	Ascomycota_unclassified	Ascomycota_unclassified	Ascomycota_unclassified
Otu000089	Fungi	Ascomycota	Sordariomycetes	Sordariomycetes_unclassified	Sordariomycetes_unclassified	Sordariomycetes_unclassified
Otu000090	Fungi	Fungi_unclassified	Fungi_unclassified	Fungi_unclassified	Fungi_unclassified	Fungi_unclassified
Otu000091	Fungi	Fungi_unclassified	Fungi_unclassified	Fungi_unclassified	Fungi_unclassified	Fungi_unclassified
Otu000092	Fungi	Ascomycota	Sordariomycetes	Hypocreales	Clavicipitaceae	Metacordyceps
Otu000093	Fungi	Fungi_unclassified	Fungi_unclassified	Fungi_unclassified	Fungi_unclassified	Fungi_unclassified
Otu000094	Fungi	Ascomycota	Dothideomycetes	Pleosporales	Massarinaceae	Stagonospora
Otu000095	Fungi	Fungi_unclassified	Fungi_unclassified	Fungi_unclassified	Fungi_unclassified	Fungi_unclassified
Otu000096	Fungi	Ascomycota	Sordariomycetes	Hypocreales	Nectriaceae	Fusarium
Otu000097	Fungi	unclassified	unclassified	unclassified	unclassified	unclassified
Otu000098	Fungi	Ascomycota	Leotiomycetes	Thelebolales	Pseudeurotiaceae	Pseudeurotium
Otu000100	Fungi	Fungi_unclassified	Fungi_unclassified	Fungi_unclassified	Fungi_unclassified	Fungi_unclassified
Otu000101	Fungi	Ascomycota	Sordariomycetes	Coniochaetales	Coniochaetaceae	Coniochaeta
Otu000102	Fungi	Ascomycota	Leotiomycetes	Helotiales	Hyaloscyphaceae	Trichopeziza
Otu000104	Fungi	Fungi_unclassified	Fungi_unclassified	Fungi_unclassified	Fungi_unclassified	Fungi_unclassified
Otu000105	Fungi	Ascomycota	Leotiomycetes	Helotiales	Helotiales_unclassified	Helotiales_unclassified
Otu000106	Fungi	Ascomycota	Dothideomycetes	Pleosporales	Didymosphaeriaceae	Didymosphaeriaceae_unclassified
Otu000107	Fungi	Ascomycota	Sordariomycetes	Hypocreales	Bionectriaceae	Valsonectria
Otu000108	Fungi	Ascomycota	Leotiomycetes	Helotiales	Hyaloscyphaceae	Microscypha
Otu000109	Fungi	Mucoromycota	Mucoromycetes	Mucorales	Mucoraceae	Mucor
Otu000110	Fungi	Ascomycota	Sordariomycetes	Hypocreales	Hypocreales_fam_Incertae_sedis	Sarocladium
Otu000111	Fungi	Ascomycota	Eurotiomycetes	Eurotiales	Aspergillaceae	Talaromyces
Otu000112	Fungi	Basidiomycota	Agaricomycetes	Agaricomycetes_unclassified	Agaricomycetes_unclassified	Agaricomycetes_unclassified
Otu000113	Fungi	Ascomycota	Sordariomycetes	Hypocreales	Nectriaceae	Fusarium
Otu000114	Fungi	Ascomycota	Eurotiomycetes	Chaetothyriales	Cyphellophoraceae	Cyphellophora
Otu000115	Fungi	Fungi_unclassified	Fungi_unclassified	Fungi_unclassified	Fungi_unclassified	Fungi_unclassified
Otu000116	Fungi	Basidiomycota	Agaricomycetes	Sebacinales	Serendipitaceae	Serendipita
Otu000117	Fungi	Ascomycota	Dothideomycetes	Pleosporales	Phaeosphaeriaceae	Paraphoma
Otu000118	Fungi	Ascomycota	Dothideomycetes	Dothideomycetes_unclassified	Dothideomycetes_unclassified	Dothideomycetes_unclassified
Otu000119	Fungi	Ascomycota	Dothideomycetes	Pleosporales	Pleosporales_unclassified	Pleosporales_unclassified
Otu000120	Fungi	Ascomycota	Dothideomycetes	Pleosporales	Phaeosphaeriaceae	Phaeosphaeriaceae_unclassified
Otu000121	Fungi	Ascomycota	Sordariomycetes	Hypocreales	Hypocreales_fam_Incertae_sedis	Acremonium
Otu000122	Fungi	Basidiomycota	Agaricomycetes	Auriculariales	Auriculariales_fam_Incertae_sedis	Oliveonia
Otu000123	Fungi	Fungi_unclassified	Fungi_unclassified	Fungi_unclassified	Fungi_unclassified	Fungi_unclassified
Otu000124	Fungi	Basidiomycota	Tremellomycetes	Tremellales	Trimorphomycetaceae	Saitozyma
Otu000125	Fungi	Basidiomycota	Microbotryomycetes	Sporidiobolales	Sporidiobolaceae	Sporobolomyces
Otu000126	Fungi	Ascomycota	Dothideomycetes	Pleosporales	Cucurbitariaceae	Pyrenochaetopsis
Otu000127	Fungi	Ascomycota	Sordariomycetes	Chaetosphaeriales	Chaetosphaeriaceae	Chaetosphaeriaceae_unclassified
Otu000128	Fungi	Ascomycota	Sordariomycetes	Xylariales	Bartaliniaceae	Truncatella
Otu000130	Fungi	Fungi_unclassified	Fungi_unclassified	Fungi_unclassified	Fungi_unclassified	Fungi_unclassified
Otu000131	Fungi	Basidiomycota	Agaricomycetes	Cantharellales	Hydnaceae	Minimedusa
Otu000132	Fungi	Fungi_unclassified	Fungi_unclassified	Fungi_unclassified	Fungi_unclassified	Fungi_unclassified
Otu000134	Fungi	Ascomycota	Leotiomycetes	Helotiales	Helotiales_unclassified	Helotiales_unclassified
Otu000135	Fungi	Ascomycota	Sordariomycetes	Hypocreales	Nectriaceae	Fusicolla
Otu000136	Fungi	Ascomycota	Dothideomycetes	Pleosporales	Pleosporaceae	Pleosporaceae_unclassified
Otu000137	Fungi	Fungi_unclassified	Fungi_unclassified	Fungi_unclassified	Fungi_unclassified	Fungi_unclassified
Otu000138	Fungi	Ascomycota	Leotiomycetes	Helotiales	Tricladiaceae	Halenospora
Otu000139	Fungi	Ascomycota	Dothideomycetes	Pleosporales	Periconiaceae	Periconia
Otu000140	Fungi	Ascomycota	Sordariomycetes	Hypocreales	Hypocreales_fam_Incertae_sedis	Acremonium
Otu000141	Fungi	Ascomycota	Sordariomycetes	Hypocreales	Niessliaceae	Niesslia
Otu000142	Fungi	Mucoromycota	Mucoromycetes	Mucorales	Rhizopodaceae	Rhizopus
Otu000143	Fungi	Basidiomycota	Tremellomycetes	Cystofilobasidiales	Mrakiaceae	Tausonia
Otu000144	Fungi	Basidiomycota	Agaricomycetes	Agaricomycetes_unclassified	Agaricomycetes_unclassified	Agaricomycetes_unclassified
Otu000145	Fungi	Ascomycota	Dothideomycetes	Pleosporales	Didymosphaeriaceae	Spegazzinia
Otu000146	Fungi	Fungi_unclassified	Fungi_unclassified	Fungi_unclassified	Fungi_unclassified	Fungi_unclassified
Otu000147	Fungi	Ascomycota	Sordariomycetes	Sordariales	Sordariales_unclassified	Sordariales_unclassified
Otu000149	Fungi	Fungi_unclassified	Fungi_unclassified	Fungi_unclassified	Fungi_unclassified	Fungi_unclassified
Otu000150	Fungi	Ascomycota	Sordariomycetes	Hypocreales	unclassified	unclassified
Otu000151	Fungi	Ascomycota	Sordariomycetes	Hypocreales	Stachybotryaceae	Albifimbria
Otu000152	Fungi	Rozellomycota	Rozellomycotina_cls_Incertae_sedis	GS11	unclassified	unclassified
Otu000153	Fungi	Ascomycota	Pezizomycetes	Pezizales	Pezizaceae	Peziza
Otu000154	Fungi	Ascomycota	Sordariomycetes	Sordariales	Chaetomiaceae	Chrysanthotrichum
Otu000155	Fungi	Ascomycota	Leotiomycetes	Helotiales	Myxotrichaceae	Oidiodendron
Otu000157	Fungi	Ascomycota	Sordariomycetes	Sordariomycetes_unclassified	Sordariomycetes_unclassified	Sordariomycetes_unclassified
Otu000158	Fungi	Basidiomycota	Agaricomycetes	Trechisporales	Hydnodontaceae	Hydnodontaceae_unclassified
Otu000159	Fungi	Chytridiomycota	Spizellomycetes	Spizellomycetales	Spizellomycetaceae	Spizellomyces
Otu000160	Fungi	Ascomycota	Leotiomycetes	Helotiales	Helotiales_fam_Incertae_sedis	Mycoarthris
Otu000161	Fungi	Ascomycota	Sordariomycetes	Atractosporales	Atractosporaceae	unclassified
Otu000162	Fungi	Ascomycota	Eurotiomycetes	Chaetothyriales	Trichomeriaceae	Knufia
Otu000163	Fungi	Ascomycota	Sordariomycetes	Sordariales	Sordariales_unclassified	Sordariales_unclassified
Otu000164	Fungi	Ascomycota	Sordariomycetes	Coniochaetales	Coniochaetaceae	Coniochaetaceae_unclassified
Otu000165	Fungi	Ascomycota	Sordariomycetes	Sordariales	Sordariales_unclassified	Sordariales_unclassified
Otu000166	Fungi	Ascomycota	Sordariomycetes	Glomerellales	Plectosphaerellaceae	Plectosphaerella
Otu000167	Fungi	Ascomycota	Sordariomycetes	Hypocreales	Clavicipitaceae	Collarina
Otu000168	Fungi	Ascomycota	Ascomycota_unclassified	Ascomycota_unclassified	Ascomycota_unclassified	Ascomycota_unclassified
Otu000169	Fungi	Ascomycota	Dothideomycetes	Pleosporales	Phaeosphaeriaceae	Neosetophoma
Otu000170	Fungi	Ascomycota	Eurotiomycetes	Eurotiales	Aspergillaceae	Talaromyces
Otu000171	Fungi	Ascomycota	Pezizomycetes	Pezizales	Pezizaceae	Peziza
Otu000172	Fungi	Mucoromycota	Mucoromycetes	Mucorales	Mucoraceae	Mucor
Otu000174	Fungi	Ascomycota	Dothideomycetes	Pleosporales	Dictyosporiaceae	unclassified
Otu000175	Fungi	Mortierellomycota	Mortierellomycetes	Mortierellales	Mortierellaceae	Mortierellaceae_unclassified
Otu000176	Fungi	Basidiomycota	Agaricomycetes	Cantharellales	Hydnaceae	Sistotrema
Otu000177	Fungi	Ascomycota	Sordariomycetes	Sordariales	Sordariales_unclassified	Sordariales_unclassified
Otu000178	Fungi	Basidiomycota	Tremellomycetes	Trichosporonales	Trichosporonaceae	Apiotrichum
Otu000179	Fungi	Basidiomycota	Agaricomycetes	Corticiales	Corticiaceae	Waitea
Otu000180	Fungi	Ascomycota	Pezizomycotina_cls_Incertae_sedis	Pezizomycotina_ord_Incertae_sedis	Pezizomycotina_fam_Incertae_sedis	Belemnospora
Otu000181	Fungi	Ascomycota	Sordariomycetes	Sordariales	Chaetomiaceae	Chaetomiaceae_unclassified
Otu000182	Fungi	Ascomycota	Dothideomycetes	Venturiales	Sympoventuriaceae	Ochroconis
Otu000183	Fungi	Ascomycota	Pezizomycotina_cls_Incertae_sedis	Pezizomycotina_ord_Incertae_sedis	Pezizomycotina_fam_Incertae_sedis	Badarisama
Otu000184	Fungi	Fungi_unclassified	Fungi_unclassified	Fungi_unclassified	Fungi_unclassified	Fungi_unclassified
Otu000185	Fungi	Ascomycota	Sordariomycetes	Hypocreales	Nectriaceae	Ilyonectria
Otu000186	Fungi	Ascomycota	Sordariomycetes	Hypocreales	Hypocreales_unclassified	Hypocreales_unclassified
Otu000187	Fungi	Ascomycota	Dothideomycetes	Pleosporales	Phaeosphaeriaceae	Phaeosphaeriaceae_unclassified
Otu000188	Fungi	Ascomycota	Dothideomycetes	Pleosporales	Tetraplosphaeriaceae	Tetraploa
Otu000189	Fungi	Fungi_unclassified	Fungi_unclassified	Fungi_unclassified	Fungi_unclassified	Fungi_unclassified
Otu000190	Fungi	Ascomycota	Sordariomycetes	Coniochaetales	Coniochaetales_unclassified	Coniochaetales_unclassified
Otu000191	Fungi	Ascomycota	Sordariomycetes	Hypocreales	Stachybotryaceae	Paramyrothecium
Otu000192	Fungi	Ascomycota	Sordariomycetes	Sordariales	Podosporaceae	Cladorrhinum
Otu000193	Fungi	Fungi_unclassified	Fungi_unclassified	Fungi_unclassified	Fungi_unclassified	Fungi_unclassified
Otu000194	Fungi	Ascomycota	Sordariomycetes	Microascales	Halosphaeriaceae	unclassified
Otu000195	Fungi	Ascomycota	Sordariomycetes	Coniochaetales	Coniochaetaceae	Coniochaetaceae_unclassified
Otu000196	Fungi	Ascomycota	Saccharomycetes	Saccharomycetales	Saccharomycetales_fam_Incertae_sedis	Candida
Otu000197	Fungi	Ascomycota	Dothideomycetes	Mycosphaerellales	Extremaceae	Extremopsis
Otu000198	Fungi	Ascomycota	Sordariomycetes	Sordariales	Lasiosphaeriaceae	Apodus
Otu000199	Fungi	Mucoromycota	Mucoromycetes	Mucorales	Cunninghamellaceae	Cunninghamellaceae_unclassified
Otu000200	Fungi	Ascomycota	Sordariomycetes	Sordariales	Podosporaceae	Cladorrhinum
Otu000201	Fungi	Ascomycota	Sordariomycetes	Sordariomycetes_unclassified	Sordariomycetes_unclassified	Sordariomycetes_unclassified
Otu000202	Fungi	Ascomycota	Sordariomycetes	Hypocreales	Nectriaceae	Sarcopodium
Otu000203	Fungi	Ascomycota	Eurotiomycetes	Chaetothyriales	Herpotrichiellaceae	Phialophora
Otu000204	Fungi	Ascomycota	Eurotiomycetes	Eurotiales	Aspergillaceae	Penicillium
Otu000205	Fungi	Ascomycota	Sordariomycetes	Chaetosphaeriales	Chaetosphaeriaceae	Dictyochaeta
Otu000207	Fungi	Basidiomycota	Tremellomycetes	Cystofilobasidiales	Cystofilobasidiaceae	Cystofilobasidium
Otu000208	Fungi	Fungi_unclassified	Fungi_unclassified	Fungi_unclassified	Fungi_unclassified	Fungi_unclassified
Otu000209	Fungi	Ascomycota	Eurotiomycetes	Chaetothyriales	Herpotrichiellaceae	Exophiala
Otu000210	Fungi	Basidiomycota	Agaricomycetes	Trechisporales	Hydnodontaceae	Subulicystidium
Otu000211	Fungi	Ascomycota	Sordariomycetes	Xylariales	Sporocadaceae	Robillarda
Otu000212	Fungi	Basidiomycota	Tremellomycetes	Filobasidiales	Piskurozymaceae	Solicoccozyma
Otu000213	Fungi	Mucoromycota	Mucoromycetes	Mucorales	Mucoraceae	Mucor
Otu000214	Fungi	Ascomycota	Sordariomycetes	Hypocreales	Hypocreales_unclassified	Hypocreales_unclassified
Otu000216	Fungi	Ascomycota	Dothideomycetes	Pleosporales	Didymosphaeriaceae	Paraphaeosphaeria
Otu000217	Fungi	Ascomycota	Sordariomycetes	Hypocreales	Nectriaceae	Thelonectria
Otu000218	Fungi	unclassified	unclassified	unclassified	unclassified	unclassified
Otu000219	Fungi	Ascomycota	Sordariomycetes	Phomatosporales	Phomatosporaceae	unclassified
Otu000220	Fungi	Ascomycota	Eurotiomycetes	Chaetothyriales	Herpotrichiellaceae	Exophiala
Otu000221	Fungi	Ascomycota	Sordariomycetes	Hypocreales	Bionectriaceae	Bionectria
Otu000222	Fungi	Ascomycota	Sordariomycetes	Hypocreales	Hypocreales_fam_Incertae_sedis	Acremonium
Otu000223	Fungi	Ascomycota	Eurotiomycetes	Eurotiales	Aspergillaceae	Penicillium
Otu000224	Fungi	Ascomycota	Dothideomycetes	Botryosphaeriales	Botryosphaeriaceae	Macrophomina
Otu000226	Fungi	Ascomycota	Pezizomycetes	Pezizales	Ascobolaceae	Ascobolus
Otu000227	Fungi	Ascomycota	Sordariomycetes	Sordariales	Chaetomiaceae	Chaetomium
Otu000228	Fungi	Ascomycota	Sordariomycetes	Amphisphaeriales	Pestalotiopsidaceae	Neopestalotiopsis
Otu000229	Fungi	Basidiomycota	Agaricomycetes	Cantharellales	Hydnaceae	Sistotrema
Otu000230	Fungi	Ascomycota	Sordariomycetes	Hypocreales	Clavicipitaceae	Collarina
Otu000231	Fungi	Fungi_unclassified	Fungi_unclassified	Fungi_unclassified	Fungi_unclassified	Fungi_unclassified
Otu000232	Fungi	Ascomycota	Sordariomycetes	Sordariales	Chaetomiaceae	Microthielavia
Otu000233	Fungi	Basidiomycota	Agaricomycetes	Agaricales	Psathyrellaceae	Coprinellus
Otu000234	Fungi	Ascomycota	Sordariomycetes	Sordariales	Lasiosphaeriaceae	Cercophora
Otu000235	Fungi	Ascomycota	Dothideomycetes	Pleosporales	Torulaceae	Torula
Otu000236	Fungi	Ascomycota	Leotiomycetes	Helotiales	Sclerotiniaceae	Clarireedia
Otu000237	Fungi	Ascomycota	Sordariomycetes	Sordariales	Chaetomiaceae	Pseudothielavia
Otu000239	Fungi	Ascomycota	Dothideomycetes	Pleosporales	Phaeosphaeriaceae	Paraphoma
Otu000240	Fungi	Ascomycota	Eurotiomycetes	Eurotiales	Aspergillaceae	Penicillium
Otu000242	Fungi	Ascomycota	Sordariomycetes	Sordariales	Lasiosphaeriaceae	Schizothecium
Otu000243	Fungi	Ascomycota	Eurotiomycetes	Eurotiales	Aspergillaceae	Aspergillus
Otu000244	Fungi	Ascomycota	Sordariomycetes	Sordariales	Podosporaceae	Cladorrhinum
Otu000245	Fungi	Fungi_unclassified	Fungi_unclassified	Fungi_unclassified	Fungi_unclassified	Fungi_unclassified
Otu000246	Fungi	Mortierellomycota	Mortierellomycetes	Mortierellales	Mortierellaceae	Mortierella
Otu000247	Fungi	Fungi_unclassified	Fungi_unclassified	Fungi_unclassified	Fungi_unclassified	Fungi_unclassified
Otu000248	Fungi	Basidiomycota	Agaricomycetes	Agaricales	Strophariaceae	Stropharia
Otu000249	Fungi	Basidiomycota	Tremellomycetes	Tremellales	Rhynchogastremataceae	Papiliotrema
Otu000250	Fungi	Ascomycota	Eurotiomycetes	Onygenales	Onygenaceae	Chrysosporium
Otu000251	Fungi	Ascomycota	Sordariomycetes	Sordariales	Chaetomiaceae	Dichotomopilus
Otu000252	Fungi	Ascomycota	Dothideomycetes	Pleosporales	Lindgomycetaceae	Lindgomycetaceae_unclassified
Otu000253	Fungi	Ascomycota	Sordariomycetes	Coniochaetales	Coniochaetaceae	Lecythophora
Otu000254	Fungi	Ascomycota	Pezizomycotina_cls_Incertae_sedis	Pezizomycotina_ord_Incertae_sedis	Pezizomycotina_fam_Incertae_sedis	Arcuadendron
Otu000255	Fungi	Ascomycota	Dothideomycetes	Pleosporales	Dictyosporiaceae	unclassified
Otu000256	Fungi	Ascomycota	Sordariomycetes	Sordariales	Bombardiaceae	Ramophialophora
Otu000257	Fungi	Ascomycota	Dothideomycetes	Pleosporales	Periconiaceae	Periconia
Otu000258	Fungi	Fungi_unclassified	Fungi_unclassified	Fungi_unclassified	Fungi_unclassified	Fungi_unclassified
Otu000259	Fungi	Ascomycota	Sordariomycetes	Hypocreales	Nectriaceae	Stephanonectria
Otu000260	Fungi	Fungi_unclassified	Fungi_unclassified	Fungi_unclassified	Fungi_unclassified	Fungi_unclassified
Otu000261	Fungi	Ascomycota	Eurotiomycetes	Eurotiales	Aspergillaceae	Penicillium
Otu000262	Fungi	Ascomycota	Sordariomycetes	Atractosporales	Conlariaceae	Conlarium
Otu000263	Fungi	Ascomycota	Sordariomycetes	Sordariales	Sordariales_unclassified	Sordariales_unclassified
Otu000264	Fungi	unclassified	unclassified	unclassified	unclassified	unclassified
Otu000265	Fungi	Ascomycota	Eurotiomycetes	Onygenales	Onygenaceae	Keratinophyton
Otu000266	Fungi	Ascomycota	Ascomycota_unclassified	Ascomycota_unclassified	Ascomycota_unclassified	Ascomycota_unclassified
Otu000267	Fungi	unclassified	unclassified	unclassified	unclassified	unclassified
Otu000268	Fungi	Fungi_unclassified	Fungi_unclassified	Fungi_unclassified	Fungi_unclassified	Fungi_unclassified
Otu000270	Fungi	Ascomycota	Sordariomycetes	Diaporthales	Diaporthaceae	Diaporthe
Otu000271	Fungi	Ascomycota	Dothideomycetes	Pleosporales	Acrocalymmaceae	Acrocalymma
Otu000272	Fungi	Mucoromycota	Mucoromycetes	Mucorales	Mucoraceae	Mucor
Otu000273	Fungi	Fungi_unclassified	Fungi_unclassified	Fungi_unclassified	Fungi_unclassified	Fungi_unclassified
Otu000274	Fungi	Ascomycota	Sordariomycetes	Hypocreales	Stachybotryaceae	Stachybotrys
Otu000275	Fungi	Ascomycota	Sordariomycetes	Hypocreales	Niessliaceae	Eucasphaeria
Otu000276	Fungi	Fungi_unclassified	Fungi_unclassified	Fungi_unclassified	Fungi_unclassified	Fungi_unclassified
Otu000278	Fungi	Fungi_unclassified	Fungi_unclassified	Fungi_unclassified	Fungi_unclassified	Fungi_unclassified
Otu000279	Fungi	Ascomycota	Dothideomycetes	Pleosporales	Phaeosphaeriaceae	Phaeosphaeriaceae_unclassified
Otu000280	Fungi	Ascomycota	Sordariomycetes	Sordariales	Sordariales_unclassified	Sordariales_unclassified
Otu000281	Fungi	Ascomycota	Sordariomycetes	Sordariales	Sordariales_unclassified	Sordariales_unclassified
Otu000282	Fungi	Fungi_unclassified	Fungi_unclassified	Fungi_unclassified	Fungi_unclassified	Fungi_unclassified
Otu000283	Fungi	Ascomycota	Sordariomycetes	Sordariales	Neoschizotheciaceae	Neoschizothecium
Otu000285	Fungi	Ascomycota	Eurotiomycetes	Chaetothyriales	Herpotrichiellaceae	Exophiala
Otu000286	Fungi	Ascomycota	Leotiomycetes	Helotiales	Helotiaceae	Scytalidium
Otu000287	Fungi	Fungi_unclassified	Fungi_unclassified	Fungi_unclassified	Fungi_unclassified	Fungi_unclassified
Otu000288	Fungi	Ascomycota	Sordariomycetes	Glomerellales	Glomerellaceae	Colletotrichum
Otu000289	Fungi	Ascomycota	Sordariomycetes	Myrmecridiales	Myrmecridiaceae	Myrmecridium
Otu000290	Fungi	Ascomycota	Sordariomycetes	Sordariomycetes_unclassified	Sordariomycetes_unclassified	Sordariomycetes_unclassified
Otu000291	Fungi	Fungi_unclassified	Fungi_unclassified	Fungi_unclassified	Fungi_unclassified	Fungi_unclassified
Otu000292	Fungi	Ascomycota	Dothideomycetes	Mycosphaerellales	Mycosphaerellaceae	Mycosphaerellaceae_unclassified
Otu000293	Fungi	Mortierellomycota	Mortierellomycetes	Mortierellales	Mortierellaceae	Mortierellaceae_unclassified
Otu000294	Fungi	Fungi_unclassified	Fungi_unclassified	Fungi_unclassified	Fungi_unclassified	Fungi_unclassified
Otu000296	Fungi	Ascomycota	Dothideomycetes	Tubeufiales	Tubeufiaceae	Helicoma
Otu000297	Fungi	Ascomycota	Sordariomycetes	Xylariales	Hyponectriaceae	Monographella
Otu000298	Fungi	unclassified	unclassified	unclassified	unclassified	unclassified
Otu000299	Fungi	Ascomycota	Leotiomycetes	Helotiales	Chaetomellaceae	Pilidium
Otu000300	Fungi	Ascomycota	Sordariomycetes	Hypocreales	Stachybotryaceae	Striaticonidium
Otu000301	Fungi	Fungi_unclassified	Fungi_unclassified	Fungi_unclassified	Fungi_unclassified	Fungi_unclassified
Otu000303	Fungi	Ascomycota	Dothideomycetes	Pleosporales	Dictyosporiaceae	Pseudocoleophoma
Otu000304	Fungi	Ascomycota	Leotiomycetes	Helotiales	Helotiales_unclassified	Helotiales_unclassified
Otu000305	Fungi	Ascomycota	Sordariomycetes	Magnaporthales	Magnaporthaceae	Magnaporthiopsis
Otu000306	Fungi	Ascomycota	Dothideomycetes	Pleosporales	Pleosporales_unclassified	Pleosporales_unclassified
Otu000307	Fungi	Ascomycota	Dothideomycetes	Pleosporales	Pleosporaceae	Alternaria
Otu000308	Fungi	Ascomycota	Leotiomycetes	Helotiales	Helotiales_unclassified	Helotiales_unclassified
Otu000309	Fungi	Chytridiomycota	Rhizophlyctidomycetes	Rhizophlyctidales	Rhizophlyctidaceae	Rhizophlyctis
Otu000310	Fungi	Fungi_unclassified	Fungi_unclassified	Fungi_unclassified	Fungi_unclassified	Fungi_unclassified
Otu000311	Fungi	Ascomycota	Sordariomycetes	Coniochaetales	Coniochaetaceae	Coniochaeta
Otu000312	Fungi	Ascomycota	Sordariomycetes	Xylariales	Xylariales_fam_Incertae_sedis	Xenoanthostomella
Otu000313	Fungi	Mortierellomycota	Mortierellomycetes	Mortierellales	Mortierellaceae	Mortierellaceae_unclassified
Otu000314	Fungi	Basidiomycota	Agaricomycetes	Agaricales	Lycoperdaceae	Arachnion
Otu000315	Fungi	Ascomycota	Sordariomycetes	Hypocreales	Hypocreaceae	Trichoderma
Otu000316	Fungi	unclassified	unclassified	unclassified	unclassified	unclassified
Otu000317	Fungi	Basidiomycota	Agaricomycetes	Phallales	Phallales_unclassified	Phallales_unclassified
Otu000318	Fungi	Ascomycota	Leotiomycetes	Helotiales	Helotiaceae	Scytalidium
Otu000319	Fungi	unclassified	unclassified	unclassified	unclassified	unclassified
Otu000320	Fungi	Ascomycota	Leotiomycetes	Helotiales	Dermateaceae	Trichosporiella
Otu000321	Fungi	Ascomycota	Sordariomycetes	Glomerellales	Glomerellaceae	Colletotrichum
Otu000322	Fungi	Mucoromycota	Mucoromycetes	Mucorales	Mucoraceae	Mucor
Otu000323	Fungi	Ascomycota	Sordariomycetes	Sordariales	Chaetomiaceae	Arcopilus
Otu000324	Fungi	Ascomycota	Ascomycota_unclassified	Ascomycota_unclassified	Ascomycota_unclassified	Ascomycota_unclassified
Otu000325	Fungi	unclassified	unclassified	unclassified	unclassified	unclassified
Otu000326	Fungi	Fungi_unclassified	Fungi_unclassified	Fungi_unclassified	Fungi_unclassified	Fungi_unclassified
Otu000327	Fungi	Basidiomycota	Agaricomycetes	Phallales	Phallaceae	Mutinus
Otu000328	Fungi	Ascomycota	Sordariomycetes	Magnaporthales	Magnaporthaceae	Magnaporthiopsis
Otu000331	Fungi	Fungi_unclassified	Fungi_unclassified	Fungi_unclassified	Fungi_unclassified	Fungi_unclassified
Otu000332	Fungi	Ascomycota	Leotiomycetes	Helotiales	Calloriaceae	Populomyces
Otu000333	Fungi	Basidiomycota	Agaricomycetes	Agaricales	Strophariaceae	Stropharia
Otu000334	Fungi	Basidiomycota	Tremellomycetes	Tremellales	Bulleribasidiaceae	Vishniacozyma
Otu000335	Fungi	Ascomycota	Sordariomycetes	Sordariomycetes_unclassified	Sordariomycetes_unclassified	Sordariomycetes_unclassified
Otu000336	Fungi	Ascomycota	Sordariomycetes	Magnaporthales	Magnaporthaceae	Gaeumannomyces
Otu000337	Fungi	Fungi_unclassified	Fungi_unclassified	Fungi_unclassified	Fungi_unclassified	Fungi_unclassified
Otu000338	Fungi	Ascomycota	Sordariomycetes	Coniochaetales	Coniochaetaceae	Lecythophora
Otu000339	Fungi	Ascomycota	Sordariomycetes	Hypocreales	Stachybotryaceae	Myrothecium
Otu000341	Fungi	Ascomycota	Sordariomycetes	Trichosphaeriales	Trichosphaeriaceae	Nigrospora
Otu000342	Fungi	Ascomycota	Sordariomycetes	Sordariales	Lasiosphaeriaceae	Schizothecium
Otu000343	Fungi	Ascomycota	Sordariomycetes	Sordariales	Sordariales_unclassified	Sordariales_unclassified
Otu000345	Fungi	Basidiomycota	Agaricomycetes	Sebacinales	Serendipitaceae	Serendipita
Otu000346	Fungi	Basidiomycota	Agaricomycetes	Geastrales	Geastrales_unclassified	Geastrales_unclassified
Otu000347	Fungi	Basidiomycota	Agaricomycetes	Tremellodendropsidales	unclassified	unclassified
Otu000349	Fungi	Ascomycota	Dothideomycetes	Pleosporales	Periconiaceae	Periconia
Otu000350	Fungi	Fungi_unclassified	Fungi_unclassified	Fungi_unclassified	Fungi_unclassified	Fungi_unclassified
Otu000351	Fungi	Chytridiomycota	Spizellomycetes	Spizellomycetales	Powellomycetaceae	Fimicolochytrium
Otu000352	Fungi	Basidiomycota	Agaricomycetes	Cantharellales	Ceratobasidiaceae	Rhizoctonia
Otu000353	Fungi	Basidiomycota	Agaricomycetes	Agaricales	Stephanosporaceae	unclassified
Otu000354	Fungi	Ascomycota	Dothideomycetes	Dothideomycetes_unclassified	Dothideomycetes_unclassified	Dothideomycetes_unclassified
Otu000355	Fungi	Fungi_unclassified	Fungi_unclassified	Fungi_unclassified	Fungi_unclassified	Fungi_unclassified
Otu000356	Fungi	Fungi_unclassified	Fungi_unclassified	Fungi_unclassified	Fungi_unclassified	Fungi_unclassified
Otu000357	Fungi	Fungi_unclassified	Fungi_unclassified	Fungi_unclassified	Fungi_unclassified	Fungi_unclassified
Otu000358	Fungi	Ascomycota	Leotiomycetes	Thelebolales	Thelebolaceae	Thelebolus
Otu000359	Fungi	Mortierellomycota	Mortierellomycetes	Mortierellales	Mortierellaceae	Mortierella
Otu000360	Fungi	Fungi_unclassified	Fungi_unclassified	Fungi_unclassified	Fungi_unclassified	Fungi_unclassified
Otu000361	Fungi	Ascomycota	Sordariomycetes	Sordariales	Podosporaceae	Podospora
Otu000363	Fungi	Ascomycota	Leotiomycetes	Helotiales	Bloxamiaceae	Bloxamia
Otu000364	Fungi	Ascomycota	Sordariomycetes	Sordariales	Sordariales_unclassified	Sordariales_unclassified
Otu000365	Fungi	Ascomycota	Sordariomycetes	Hypocreales	Hypocreales_fam_Incertae_sedis	Fusariella
Otu000366	Fungi	Fungi_unclassified	Fungi_unclassified	Fungi_unclassified	Fungi_unclassified	Fungi_unclassified
Otu000367	Fungi	Ascomycota	Dothideomycetes	Pleosporales	Leptosphaeriaceae	Plenodomus
Otu000368	Fungi	Ascomycota	Eurotiomycetes	Onygenales	Onygenales_unclassified	Onygenales_unclassified
Otu000369	Fungi	Ascomycota	Dothideomycetes	Pleosporales	Pleosporales_unclassified	Pleosporales_unclassified
Otu000370	Fungi	Ascomycota	Sordariomycetes	Hypocreales	Nectriaceae	Nectria
Otu000371	Fungi	Fungi_unclassified	Fungi_unclassified	Fungi_unclassified	Fungi_unclassified	Fungi_unclassified
Otu000373	Fungi	Ascomycota	Sordariomycetes	Hypocreales	Clavicipitaceae	Metapochonia
Otu000374	Fungi	Ascomycota	Dothideomycetes	Pleosporales	Pleosporales_unclassified	Pleosporales_unclassified
Otu000375	Fungi	Ascomycota	Sordariomycetes	Sordariales	Sordariales_unclassified	Sordariales_unclassified
Otu000376	Fungi	Basidiomycota	Tremellomycetes	Tremellales	Bulleribasidiaceae	Hannaella
Otu000377	Fungi	unclassified	unclassified	unclassified	unclassified	unclassified
Otu000379	Fungi	Ascomycota	Leotiomycetes	Helotiales	Myxotrichaceae	Oidiodendron
Otu000380	Fungi	Fungi_unclassified	Fungi_unclassified	Fungi_unclassified	Fungi_unclassified	Fungi_unclassified
Otu000381	Fungi	Ascomycota	Leotiomycetes	Helotiales	Helotiales_fam_Incertae_sedis	Acidomelania
Otu000382	Fungi	Fungi_unclassified	Fungi_unclassified	Fungi_unclassified	Fungi_unclassified	Fungi_unclassified
Otu000383	Fungi	Fungi_unclassified	Fungi_unclassified	Fungi_unclassified	Fungi_unclassified	Fungi_unclassified
Otu000384	Fungi	Ascomycota	Dothideomycetes	Pleosporales	Phaeosphaeriaceae	Phaeosphaeriaceae_unclassified
Otu000385	Fungi	Ascomycota	Sordariomycetes	Chaetosphaeriales	Chaetosphaeriaceae	Chloridium
Otu000386	Fungi	Ascomycota	Sordariomycetes	Microascales	Microascaceae	Kernia
Otu000387	Fungi	Mortierellomycota	Mortierellomycetes	Mortierellales	Mortierellaceae	Mortierella
Otu000388	Fungi	Ascomycota	Dothideomycetes	Tubeufiales	Tubeufiaceae	Helicoma
Otu000389	Fungi	Ascomycota	Eurotiomycetes	Eurotiales	Aspergillaceae	Penicillium
Otu000390	Fungi	Ascomycota	Sordariomycetes	Hypocreales	Nectriaceae	Fusicolla
Otu000391	Fungi	Ascomycota	Dothideomycetes	Pleosporales	Melanommataceae	Sporidesmiella
Otu000392	Fungi	Ascomycota	Dothideomycetes	Pleosporales	Lentitheciaceae	Pleurophoma
Otu000393	Fungi	Fungi_unclassified	Fungi_unclassified	Fungi_unclassified	Fungi_unclassified	Fungi_unclassified
Otu000394	Fungi	Basidiomycota	Tremellomycetes	Tremellales	Bulleribasidiaceae	Vishniacozyma
Otu000395	Fungi	Ascomycota	Sordariomycetes	Hypocreales	Nectriaceae	Thelonectria
Otu000396	Fungi	Ascomycota	Sordariomycetes	Sordariales	Chaetomiaceae	Arcopilus
Otu000397	Fungi	Ascomycota	Pezizomycetes	Pezizales	Ascobolaceae	Ascobolus
Otu000398	Fungi	Fungi_unclassified	Fungi_unclassified	Fungi_unclassified	Fungi_unclassified	Fungi_unclassified
Otu000399	Fungi	Ascomycota	Eurotiomycetes	Eurotiales	Aspergillaceae	Aspergillus
Otu000400	Fungi	Ascomycota	Sordariomycetes	Sordariales	Sordariales_unclassified	Sordariales_unclassified
Otu000401	Fungi	Fungi_unclassified	Fungi_unclassified	Fungi_unclassified	Fungi_unclassified	Fungi_unclassified
Otu000402	Fungi	Ascomycota	Eurotiomycetes	Eurotiales	Aspergillaceae	Aspergillus
Otu000403	Fungi	Fungi_unclassified	Fungi_unclassified	Fungi_unclassified	Fungi_unclassified	Fungi_unclassified
Otu000404	Fungi	Basidiomycota	Tremellomycetes	Trichosporonales	Trichosporonaceae	Apiotrichum
Otu000405	Fungi	Ascomycota	Sordariomycetes	Hypocreales	Stachybotryaceae	Stachybotryaceae_unclassified
Otu000406	Fungi	Ascomycota	Dothideomycetes	Pleosporales	Periconiaceae	Periconia
Otu000407	Fungi	Ascomycota	Dothideomycetes	Pleosporales	Didymellaceae	Neoascochyta
Otu000408	Fungi	Basidiomycota	Microbotryomycetes	Sporidiobolales	Sporidiobolaceae	Rhodotorula
Otu000409	Fungi	Ascomycota	Sordariomycetes	Hypocreales	Hypocreales_unclassified	Hypocreales_unclassified
Otu000412	Fungi	Ascomycota	Dothideomycetes	Pleosporales	Phaeosphaeriaceae	Phaeosphaeria
Otu000413	Fungi	Ascomycota	Dothideomycetes	Pleosporales	Phaeosphaeriaceae	Didymocyrtis
Otu000414	Fungi	unclassified	unclassified	unclassified	unclassified	unclassified
Otu000415	Fungi	unclassified	unclassified	unclassified	unclassified	unclassified
Otu000416	Fungi	Ascomycota	Dothideomycetes	Venturiales	Sympoventuriaceae	Ochroconis
Otu000417	Fungi	Ascomycota	Pezizomycotina_cls_Incertae_sedis	unclassified	unclassified	unclassified
Otu000418	Fungi	Ascomycota	Sordariomycetes	Microascales	Halosphaeriaceae	Cirrenalia
Otu000419	Fungi	Basidiomycota	Agaricomycetes	Agaricales	Bolbitiaceae	Conocybe
Otu000420	Fungi	Ascomycota	Dothideomycetes	Pleosporales	Pleosporaceae	Curvularia
Otu000421	Fungi	Fungi_unclassified	Fungi_unclassified	Fungi_unclassified	Fungi_unclassified	Fungi_unclassified
Otu000422	Fungi	Ascomycota	Dothideomycetes	Pleosporales	Pleosporales_unclassified	Pleosporales_unclassified
Otu000423	Fungi	Ascomycota	Dothideomycetes	Pleosporales	Phaeosphaeriaceae	Phaeosphaeriaceae_unclassified
Otu000424	Fungi	Fungi_unclassified	Fungi_unclassified	Fungi_unclassified	Fungi_unclassified	Fungi_unclassified
Otu000425	Fungi	Ascomycota	Eurotiomycetes	Eurotiales	Aspergillaceae	Penicillium
Otu000426	Fungi	Ascomycota	Sordariomycetes	Sordariales	Sordariales_unclassified	Sordariales_unclassified
Otu000427	Fungi	Ascomycota	Sordariomycetes	Hypocreales	Niessliaceae	Eucasphaeria
Otu000428	Fungi	Basidiomycota	Agaricostilbomycetes	Agaricostilbales	Chionosphaeraceae	Kurtzmanomyces
Otu000429	Fungi	Ascomycota	Sordariomycetes	Sordariales	Lasiosphaeriaceae	Echria
Otu000430	Fungi	Ascomycota	Sordariomycetes	Microascales	Microascaceae	Microascaceae_unclassified
Otu000431	Fungi	unclassified	unclassified	unclassified	unclassified	unclassified
Otu000432	Fungi	Basidiomycota	Agaricomycetes	Agaricales	Entolomataceae	Clitopilus
Otu000433	Fungi	Fungi_unclassified	Fungi_unclassified	Fungi_unclassified	Fungi_unclassified	Fungi_unclassified
Otu000434	Fungi	Ascomycota	Dothideomycetes	Venturiales	Sympoventuriaceae	Scolecobasidium
Otu000435	Fungi	Ascomycota	Laboulbeniomycetes	Pyxidiophorales	unclassified	unclassified
Otu000436	Fungi	Ascomycota	Sordariomycetes	Sordariomycetes_unclassified	Sordariomycetes_unclassified	Sordariomycetes_unclassified
Otu000437	Fungi	Ascomycota	Leotiomycetes	Helotiales	Helotiales_unclassified	Helotiales_unclassified
Otu000438	Fungi	Ascomycota	Dothideomycetes	Pleosporales	Cucurbitariaceae	Pyrenochaetopsis
Otu000439	Fungi	Ascomycota	Sordariomycetes	Xylariales	Apiosporaceae	unclassified
Otu000441	Fungi	Ascomycota	Ascomycota_unclassified	Ascomycota_unclassified	Ascomycota_unclassified	Ascomycota_unclassified
Otu000442	Fungi	Ascomycota	Ascomycota_unclassified	Ascomycota_unclassified	Ascomycota_unclassified	Ascomycota_unclassified
Otu000443	Fungi	Ascomycota	Dothideomycetes	Pleosporales	Phaeosphaeriaceae	Ophiosphaerella
Otu000444	Fungi	Fungi_unclassified	Fungi_unclassified	Fungi_unclassified	Fungi_unclassified	Fungi_unclassified
Otu000445	Fungi	Fungi_unclassified	Fungi_unclassified	Fungi_unclassified	Fungi_unclassified	Fungi_unclassified
Otu000446	Fungi	Ascomycota	Sordariomycetes	Hypocreales	Stachybotryaceae	Myrothecium
Otu000447	Fungi	unclassified	unclassified	unclassified	unclassified	unclassified
Otu000448	Fungi	Basidiomycota	Tremellomycetes	Cystofilobasidiales	Mrakiaceae	Udeniomyces
Otu000449	Fungi	Basidiomycota	Agaricomycetes	Agaricales	Psathyrellaceae	Coprinopsis
Otu000450	Fungi	Ascomycota	Sordariomycetes	Hypocreales	Hypocreales_unclassified	Hypocreales_unclassified
Otu000451	Fungi	Ascomycota	Pezizomycetes	Pezizales	Ascodesmidaceae	Cephaliophora
Otu000452	Fungi	Ascomycota	Dothideomycetes	Pleosporales	Melanommataceae	Pleotrichocladium
Otu000453	Fungi	Ascomycota	Dothideomycetes	Tubeufiales	Tubeufiales_unclassified	Tubeufiales_unclassified
Otu000454	Fungi	Basidiomycota	Agaricomycetes	Gomphales	unclassified	unclassified
Otu000455	Fungi	Ascomycota	Dothideomycetes	Pleosporales	Torulaceae	Dendryphion
Otu000456	Fungi	Ascomycota	Dothideomycetes	Pleosporales	Lentitheciaceae	Poaceascoma
Otu000457	Fungi	Ascomycota	Dothideomycetes	Venturiales	Sympoventuriaceae	Ochroconis
Otu000458	Fungi	Ascomycota	Sordariomycetes	Hypocreales	Hypocreales_fam_Incertae_sedis	Acremonium
Otu000459	Fungi	Fungi_unclassified	Fungi_unclassified	Fungi_unclassified	Fungi_unclassified	Fungi_unclassified
Otu000460	Fungi	Ascomycota	Sordariomycetes	Chaetosphaeriales	Chaetosphaeriaceae	Chaetosphaeriaceae_unclassified
Otu000462	Fungi	Fungi_unclassified	Fungi_unclassified	Fungi_unclassified	Fungi_unclassified	Fungi_unclassified
Otu000463	Fungi	Ascomycota	Ascomycota_unclassified	Ascomycota_unclassified	Ascomycota_unclassified	Ascomycota_unclassified
Otu000464	Fungi	Fungi_unclassified	Fungi_unclassified	Fungi_unclassified	Fungi_unclassified	Fungi_unclassified
Otu000465	Fungi	Basidiomycota	Atractiellomycetes	Atractiellales	Hoehnelomycetaceae	Atractiella
Otu000466	Fungi	Fungi_unclassified	Fungi_unclassified	Fungi_unclassified	Fungi_unclassified	Fungi_unclassified
Otu000467	Fungi	Ascomycota	Dothideomycetes	Pleosporales	Phaeosphaeriaceae	Phaeosphaeriaceae_unclassified
Otu000468	Fungi	Ascomycota	Eurotiomycetes	Eurotiales	Trichocomaceae	Sagenomella
Otu000469	Fungi	Ascomycota	Sordariomycetes	Trichosphaeriales	Trichosphaeriaceae	Nigrospora
Otu000470	Fungi	Ascomycota	Saccharomycetes	Saccharomycetales	Trichomonascaceae	Trichomonascus
Otu000471	Fungi	Chytridiomycota	unclassified	unclassified	unclassified	unclassified
Otu000472	Fungi	Fungi_unclassified	Fungi_unclassified	Fungi_unclassified	Fungi_unclassified	Fungi_unclassified
Otu000474	Fungi	Fungi_unclassified	Fungi_unclassified	Fungi_unclassified	Fungi_unclassified	Fungi_unclassified
Otu000475	Fungi	Ascomycota	Eurotiomycetes	Eurotiales	Aspergillaceae	Aspergillus
Otu000476	Fungi	Fungi_unclassified	Fungi_unclassified	Fungi_unclassified	Fungi_unclassified	Fungi_unclassified
Otu000477	Fungi	Fungi_unclassified	Fungi_unclassified	Fungi_unclassified	Fungi_unclassified	Fungi_unclassified
Otu000478	Fungi	unclassified	unclassified	unclassified	unclassified	unclassified
Otu000479	Fungi	Basidiomycota	Agaricomycetes	Agaricales	Hygrophoraceae	Arrhenia
Otu000480	Fungi	Ascomycota	Sordariomycetes	Sordariales	Chaetomiaceae	Trichocladium
Otu000481	Fungi	Ascomycota	Eurotiomycetes	Onygenales	Onygenales_unclassified	Onygenales_unclassified
Otu000482	Fungi	Basidiomycota	Tremellomycetes	Trichosporonales	Trichosporonaceae	Cutaneotrichosporon
Otu000483	Fungi	Ascomycota	Sordariomycetes	Magnaporthales	Magnaporthaceae	Magnaporthiopsis
Otu000485	Fungi	Ascomycota	Sordariomycetes	Hypocreales	Nectriaceae	Fusarium
Otu000486	Fungi	Ascomycota	Dothideomycetes	Venturiales	Sympoventuriaceae	Sympoventuriaceae_unclassified
Otu000487	Fungi	Ascomycota	Eurotiomycetes	Chaetothyriales	Chaetothyriales_unclassified	Chaetothyriales_unclassified
Otu000488	Fungi	Ascomycota	Pezizomycetes	Pezizales	Pezizaceae	Pezizaceae_unclassified
Otu000489	Fungi	Fungi_unclassified	Fungi_unclassified	Fungi_unclassified	Fungi_unclassified	Fungi_unclassified
Otu000490	Fungi	Fungi_unclassified	Fungi_unclassified	Fungi_unclassified	Fungi_unclassified	Fungi_unclassified
Otu000491	Fungi	Ascomycota	Dothideomycetes	Pleosporales	Corynesporascaceae	Corynespora
Otu000492	Fungi	Fungi_unclassified	Fungi_unclassified	Fungi_unclassified	Fungi_unclassified	Fungi_unclassified
Otu000493	Fungi	Basidiomycota	Pucciniomycetes	Platygloeales	Eocronartiaceae	Eocronartium
Otu000495	Fungi	Ascomycota	Dothideomycetes	Pleosporales	Roussoellaceae	Neoroussoella
Otu000496	Fungi	Fungi_unclassified	Fungi_unclassified	Fungi_unclassified	Fungi_unclassified	Fungi_unclassified
Otu000497	Fungi	Fungi_unclassified	Fungi_unclassified	Fungi_unclassified	Fungi_unclassified	Fungi_unclassified
Otu000498	Fungi	Basidiomycota	Agaricomycetes	Agaricales	Bolbitiaceae	Conocybe
Otu000499	Fungi	unclassified	unclassified	unclassified	unclassified	unclassified
Otu000500	Fungi	Ascomycota	Sordariomycetes	Hypocreales	Bionectriaceae	Caespitomonium
Otu000501	Fungi	Ascomycota	Sordariomycetes	Hypocreales	Hypocreales_unclassified	Hypocreales_unclassified
Otu000502	Fungi	Fungi_unclassified	Fungi_unclassified	Fungi_unclassified	Fungi_unclassified	Fungi_unclassified
Otu000503	Fungi	Fungi_unclassified	Fungi_unclassified	Fungi_unclassified	Fungi_unclassified	Fungi_unclassified
Otu000504	Fungi	Ascomycota	Ascomycota_unclassified	Ascomycota_unclassified	Ascomycota_unclassified	Ascomycota_unclassified
Otu000505	Fungi	Ascomycota	Eurotiomycetes	Chaetothyriales	Trichomeriaceae	Knufia
Otu000506	Fungi	Fungi_unclassified	Fungi_unclassified	Fungi_unclassified	Fungi_unclassified	Fungi_unclassified
Otu000507	Fungi	Fungi_unclassified	Fungi_unclassified	Fungi_unclassified	Fungi_unclassified	Fungi_unclassified
Otu000508	Fungi	Ascomycota	Leotiomycetes	Helotiales	Helotiales_unclassified	Helotiales_unclassified
Otu000509	Fungi	unclassified	unclassified	unclassified	unclassified	unclassified
Otu000510	Fungi	Ascomycota	Dothideomycetes	Pleosporales	Lophiotremataceae	Atrocalyx
Otu000512	Fungi	Ascomycota	Sordariomycetes	Sordariales	Podosporaceae	Cladorrhinum
Otu000513	Fungi	Fungi_unclassified	Fungi_unclassified	Fungi_unclassified	Fungi_unclassified	Fungi_unclassified
Otu000515	Fungi	Mortierellomycota	Mortierellomycetes	Mortierellales	Mortierellaceae	Mortierellaceae_unclassified
Otu000516	Fungi	Ascomycota	Orbiliomycetes	Orbiliales	Orbiliales_unclassified	Orbiliales_unclassified
Otu000517	Fungi	Basidiomycota	Agaricomycetes	Agaricales	Strophariaceae	Deconica
Otu000518	Fungi	Ascomycota	Sordariomycetes	Sordariales	Neoschizotheciaceae	Neoschizothecium
Otu000519	Fungi	Fungi_unclassified	Fungi_unclassified	Fungi_unclassified	Fungi_unclassified	Fungi_unclassified
Otu000520	Fungi	Ascomycota	Saccharomycetes	Saccharomycetales	Lipomycetaceae	Lipomyces
Otu000521	Fungi	Ascomycota	Orbiliomycetes	Orbiliales	Orbiliales_unclassified	Orbiliales_unclassified
Otu000522	Fungi	Ascomycota	Leotiomycetes	Helotiales	Discinellaceae	Discinellaceae_unclassified
Otu000523	Fungi	Ascomycota	Leotiomycetes	Helotiales	Hyaloscyphaceae	Clathrosphaerina
Otu000526	Fungi	Chytridiomycota	Chytridiomycota_unclassified	Chytridiomycota_unclassified	Chytridiomycota_unclassified	Chytridiomycota_unclassified
Otu000527	Fungi	Rozellomycota	Rozellomycotina_cls_Incertae_sedis	GS05	unclassified	unclassified
Otu000529	Fungi	Ascomycota	Sordariomycetes	Microascales	Microascales_fam_Incertae_sedis	Cephalotrichiella
Otu000530	Fungi	Fungi_unclassified	Fungi_unclassified	Fungi_unclassified	Fungi_unclassified	Fungi_unclassified
Otu000531	Fungi	Ascomycota	Eurotiomycetes	Onygenales	Onygenales_fam_Incertae_sedis	Spiromastix
Otu000532	Fungi	Ascomycota	Dothideomycetes	Pleosporales	Phaeosphaeriaceae	Phaeosphaeriaceae_unclassified
Otu000533	Fungi	Ascomycota	Sordariomycetes	Chaetosphaeriales	Chaetosphaeriaceae	Chaetosphaeria
Otu000534	Fungi	Ascomycota	Ascomycota_unclassified	Ascomycota_unclassified	Ascomycota_unclassified	Ascomycota_unclassified
Otu000536	Fungi	Ascomycota	Ascomycota_unclassified	Ascomycota_unclassified	Ascomycota_unclassified	Ascomycota_unclassified
Otu000537	Fungi	Basidiomycota	Agaricomycetes	Agaricales	Psathyrellaceae	Coprinellus
Otu000538	Fungi	Ascomycota	Eurotiomycetes	Chaetothyriales	Trichomeriaceae	Knufia
Otu000539	Fungi	Chytridiomycota	Rhizophlyctidomycetes	Rhizophlyctidales	Rhizophlyctidaceae	Rhizophlyctis
Otu000540	Fungi	Ascomycota	Eurotiomycetes	Eurotiales	Eurotiales_unclassified	Eurotiales_unclassified
Otu000541	Fungi	Ascomycota	Eurotiomycetes	Eurotiales	Trichocomaceae	Sagenomella
Otu000542	Fungi	Fungi_unclassified	Fungi_unclassified	Fungi_unclassified	Fungi_unclassified	Fungi_unclassified
Otu000543	Fungi	Basidiomycota	Agaricomycetes	Agaricales	Nidulariaceae	Cyathus
Otu000544	Fungi	Ascomycota	Sordariomycetes	Sordariales	Sordariaceae	Sordaria
Otu000546	Fungi	Chytridiomycota	Spizellomycetes	Spizellomycetales	unclassified	unclassified
Otu000547	Fungi	Fungi_unclassified	Fungi_unclassified	Fungi_unclassified	Fungi_unclassified	Fungi_unclassified
Otu000548	Fungi	Ascomycota	Sordariomycetes	Hypocreales	Hypocreales_unclassified	Hypocreales_unclassified
Otu000549	Fungi	Ascomycota	Sordariomycetes	Xylariales	Anungitiomycetaceae	unclassified
Otu000550	Fungi	Ascomycota	Pezizomycotina_cls_Incertae_sedis	Pezizomycotina_ord_Incertae_sedis	Pezizomycotina_fam_Incertae_sedis	Arcuadendron
Otu000551	Fungi	Ascomycota	Dothideomycetes	Venturiales	Sympoventuriaceae	Scolecobasidium
Otu000552	Fungi	Ascomycota	Sordariomycetes	Hypocreales	Nectriaceae	Nectriaceae_unclassified
Otu000553	Fungi	Basidiomycota	Agaricomycetes	Agaricales	Psathyrellaceae	Coprinopsis
Otu000554	Fungi	Ascomycota	Eurotiomycetes	Eurotiales	Aspergillaceae	Talaromyces
Otu000555	Fungi	Fungi_unclassified	Fungi_unclassified	Fungi_unclassified	Fungi_unclassified	Fungi_unclassified
Otu000556	Fungi	Ascomycota	Sordariomycetes	Hypocreales	Nectriaceae	Pseudocosmospora
Otu000557	Fungi	Fungi_unclassified	Fungi_unclassified	Fungi_unclassified	Fungi_unclassified	Fungi_unclassified
Otu000558	Fungi	Ascomycota	Dothideomycetes	Pleosporales	Pleomassariaceae	Tumularia
Otu000559	Fungi	Fungi_unclassified	Fungi_unclassified	Fungi_unclassified	Fungi_unclassified	Fungi_unclassified
Otu000561	Fungi	Fungi_unclassified	Fungi_unclassified	Fungi_unclassified	Fungi_unclassified	Fungi_unclassified
Otu000562	Fungi	Fungi_unclassified	Fungi_unclassified	Fungi_unclassified	Fungi_unclassified	Fungi_unclassified
Otu000563	Fungi	Ascomycota	Sordariomycetes	Sordariomycetes_unclassified	Sordariomycetes_unclassified	Sordariomycetes_unclassified
Otu000564	Fungi	Ascomycota	Sordariomycetes	Hypocreales	Hypocreaceae	Trichoderma
Otu000566	Fungi	Ascomycota	Sordariomycetes	Hypocreales	Hypocreaceae	Trichoderma
Otu000567	Fungi	Ascomycota	Sordariomycetes	Hypocreales	Cordycipitaceae	Lecanicillium
Otu000568	Fungi	Ascomycota	Sordariomycetes	Hypocreales	Stachybotryaceae	Stachybotryaceae_unclassified
Otu000569	Fungi	Fungi_unclassified	Fungi_unclassified	Fungi_unclassified	Fungi_unclassified	Fungi_unclassified
Otu000571	Fungi	Fungi_unclassified	Fungi_unclassified	Fungi_unclassified	Fungi_unclassified	Fungi_unclassified
Otu000572	Fungi	Fungi_unclassified	Fungi_unclassified	Fungi_unclassified	Fungi_unclassified	Fungi_unclassified
Otu000573	Fungi	Ascomycota	Eurotiomycetes	Onygenales	Gymnoascaceae	Arachniotus
Otu000574	Fungi	Ascomycota	Leotiomycetes	Helotiales	Helotiaceae	Hymenoscyphus
Otu000575	Fungi	Fungi_unclassified	Fungi_unclassified	Fungi_unclassified	Fungi_unclassified	Fungi_unclassified
Otu000576	Fungi	Ascomycota	Dothideomycetes	Dothideomycetes_unclassified	Dothideomycetes_unclassified	Dothideomycetes_unclassified
Otu000577	Fungi	Basidiomycota	Tremellomycetes	Cystofilobasidiales	Mrakiaceae	Mrakia
Otu000578	Fungi	Ascomycota	Sordariomycetes	Coniochaetales	Coniochaetaceae	Coniochaeta
Otu000579	Fungi	Ascomycota	Sordariomycetes	Hypocreales	Nectriaceae	Thelonectria
Otu000580	Fungi	Ascomycota	Eurotiomycetes	Chaetothyriales	Herpotrichiellaceae	Cladophialophora
Otu000581	Fungi	Basidiomycota	Agaricomycetes	Agaricales	Psathyrellaceae	Coprinopsis
Otu000582	Fungi	Ascomycota	Dothideomycetes	Pleosporales	Pleosporales_unclassified	Pleosporales_unclassified
Otu000583	Fungi	Ascomycota	Dothideomycetes	Mycosphaerellales	Mycosphaerellaceae	Septoria
Otu000584	Fungi	Ascomycota	Sordariomycetes	Magnaporthales	Magnaporthaceae	Pseudophialophora
Otu000585	Fungi	Basidiomycota	Agaricostilbomycetes	Agaricostilbales	Chionosphaeraceae	Chionosphaeraceae_unclassified
Otu000586	Fungi	Basidiomycota	Agaricomycetes	Trechisporales	Hydnodontaceae	Trechispora
Otu000587	Fungi	Ascomycota	Sordariomycetes	Microascales	Halosphaeriaceae	unclassified
Otu000588	Fungi	Mortierellomycota	Mortierellomycetes	Mortierellales	Mortierellaceae	Mortierellaceae_unclassified
Otu000590	Fungi	Fungi_unclassified	Fungi_unclassified	Fungi_unclassified	Fungi_unclassified	Fungi_unclassified
Otu000591	Fungi	Ascomycota	Ascomycota_unclassified	Ascomycota_unclassified	Ascomycota_unclassified	Ascomycota_unclassified
Otu000593	Fungi	Basidiomycota	Agaricomycetes	Agaricales	Lycoperdaceae	Calvatia
Otu000594	Fungi	Ascomycota	Dothideomycetes	Acrospermales	Acrospermales_fam_Incertae_sedis	Leptodiscella
Otu000595	Fungi	Ascomycota	Dothideomycetes	Pleosporales	Massarinaceae	Massarinaceae_unclassified
Otu000596	Fungi	Ascomycota	Sordariomycetes	Sordariales	Sordariales_unclassified	Sordariales_unclassified
Otu000597	Fungi	Fungi_unclassified	Fungi_unclassified	Fungi_unclassified	Fungi_unclassified	Fungi_unclassified
Otu000599	Fungi	Fungi_unclassified	Fungi_unclassified	Fungi_unclassified	Fungi_unclassified	Fungi_unclassified
Otu000600	Fungi	Fungi_unclassified	Fungi_unclassified	Fungi_unclassified	Fungi_unclassified	Fungi_unclassified
Otu000601	Fungi	Ascomycota	Dothideomycetes	Pleosporales	Lentitheciaceae	unclassified
Otu000602	Fungi	Fungi_unclassified	Fungi_unclassified	Fungi_unclassified	Fungi_unclassified	Fungi_unclassified
Otu000603	Fungi	Ascomycota	Sordariomycetes	Chaetosphaeriales	Chaetosphaeriaceae	Pseudophialocephala
Otu000604	Fungi	unclassified	unclassified	unclassified	unclassified	unclassified
Otu000605	Fungi	unclassified	unclassified	unclassified	unclassified	unclassified
Otu000606	Fungi	unclassified	unclassified	unclassified	unclassified	unclassified
Otu000607	Fungi	Fungi_unclassified	Fungi_unclassified	Fungi_unclassified	Fungi_unclassified	Fungi_unclassified
Otu000608	Fungi	Basidiomycota	Microbotryomycetes	Leucosporidiales	Leucosporidiaceae	Leucosporidium
Otu000609	Fungi	Ascomycota	Sordariomycetes	Sordariales	Chaetomiaceae	Chaetomiaceae_unclassified
Otu000611	Fungi	unclassified	unclassified	unclassified	unclassified	unclassified
Otu000612	Fungi	Basidiomycota	Tremellomycetes	Tremellales	Bulleribasidiaceae	Hannaella
Otu000613	Fungi	Fungi_unclassified	Fungi_unclassified	Fungi_unclassified	Fungi_unclassified	Fungi_unclassified
Otu000614	Fungi	Ascomycota	Sordariomycetes	Sordariomycetes_ord_Incertae_sedis	Junewangiaceae	unclassified
Otu000615	Fungi	Basidiomycota	Classiculomycetes	Classiculales	unclassified	unclassified
Otu000616	Fungi	Ascomycota	Eurotiomycetes	Eurotiales	Aspergillaceae	Aspergillaceae_unclassified
Otu000618	Fungi	Fungi_unclassified	Fungi_unclassified	Fungi_unclassified	Fungi_unclassified	Fungi_unclassified
Otu000619	Fungi	Mortierellomycota	Mortierellomycetes	Mortierellales	Mortierellaceae	Mortierella
Otu000620	Fungi	Fungi_unclassified	Fungi_unclassified	Fungi_unclassified	Fungi_unclassified	Fungi_unclassified
Otu000621	Fungi	Ascomycota	Sordariomycetes	Sordariales	Lasiosphaeriaceae	Schizothecium
Otu000623	Fungi	Ascomycota	Eurotiomycetes	Eurotiales	Aspergillaceae	Aspergillus
Otu000624	Fungi	Ascomycota	Orbiliomycetes	Orbiliales	Orbiliales_fam_Incertae_sedis	Vermispora
Otu000625	Fungi	unclassified	unclassified	unclassified	unclassified	unclassified
Otu000627	Fungi	Ascomycota	Ascomycota_unclassified	Ascomycota_unclassified	Ascomycota_unclassified	Ascomycota_unclassified
Otu000628	Fungi	Ascomycota	Sordariomycetes	Hypocreales	Nectriaceae	Volutella
Otu000629	Fungi	Fungi_unclassified	Fungi_unclassified	Fungi_unclassified	Fungi_unclassified	Fungi_unclassified
Otu000631	Fungi	Ascomycota	Leotiomycetes	Helotiales	Helotiales_unclassified	Helotiales_unclassified
Otu000632	Fungi	Ascomycota	Dothideomycetes	Tubeufiales	Tubeufiaceae	Tubeufiaceae_unclassified
Otu000634	Fungi	Ascomycota	Ascomycota_unclassified	Ascomycota_unclassified	Ascomycota_unclassified	Ascomycota_unclassified
Otu000635	Fungi	Fungi_unclassified	Fungi_unclassified	Fungi_unclassified	Fungi_unclassified	Fungi_unclassified
Otu000636	Fungi	Fungi_unclassified	Fungi_unclassified	Fungi_unclassified	Fungi_unclassified	Fungi_unclassified
Otu000637	Fungi	Ascomycota	Eurotiomycetes	Eurotiales	Aspergillaceae	Penicillium
Otu000638	Fungi	Fungi_unclassified	Fungi_unclassified	Fungi_unclassified	Fungi_unclassified	Fungi_unclassified
Otu000639	Fungi	Ascomycota	Dothideomycetes	Tubeufiales	Tubeufiaceae	Tubeufiaceae_unclassified
Otu000640	Fungi	Ascomycota	Sordariomycetes	Hypocreales	Nectriaceae	Fusarium
Otu000641	Fungi	Ascomycota	Dothideomycetes	Pleosporales	Pleosporales_unclassified	Pleosporales_unclassified
Otu000643	Fungi	Ascomycota	Sordariomycetes	Sordariomycetes_ord_Incertae_sedis	Junewangiaceae	unclassified
Otu000644	Fungi	Glomeromycota	Glomeromycetes	Glomerales	Glomeraceae	Dominikia
Otu000645	Fungi	Basidiomycota	Agaricomycetes	Cantharellales	Ceratobasidiaceae	Ceratobasidiaceae_unclassified
Otu000646	Fungi	Fungi_unclassified	Fungi_unclassified	Fungi_unclassified	Fungi_unclassified	Fungi_unclassified
Otu000647	Fungi	Ascomycota	Eurotiomycetes	Onygenales	Onygenaceae	Xanthothecium
Otu000648	Fungi	Ascomycota	Eurotiomycetes	Chaetothyriales	Cyphellophoraceae	Cyphellophora
Otu000649	Fungi	Ascomycota	Sordariomycetes	Hypocreales	Hypocreales_unclassified	Hypocreales_unclassified
Otu000650	Fungi	Fungi_unclassified	Fungi_unclassified	Fungi_unclassified	Fungi_unclassified	Fungi_unclassified
Otu000652	Fungi	Basidiomycota	Agaricomycetes	Sebacinales	Serendipitaceae	Serendipita
Otu000653	Fungi	Ascomycota	Sordariomycetes	Chaetosphaeriales	Chaetosphaeriaceae	Dinemasporium
Otu000655	Fungi	Ascomycota	Sordariomycetes	Hypocreales	Hypocreaceae	Kiflimonium
Otu000656	Fungi	Ascomycota	Sordariomycetes	Microascales	Microascaceae	Acaulium
Otu000657	Fungi	Ascomycota	Sordariomycetes	Sordariomycetes_unclassified	Sordariomycetes_unclassified	Sordariomycetes_unclassified
Otu000658	Fungi	Fungi_unclassified	Fungi_unclassified	Fungi_unclassified	Fungi_unclassified	Fungi_unclassified
Otu000659	Fungi	Ascomycota	Lecanoromycetes	Ostropales	Stictidaceae	Karstenia
Otu000661	Fungi	Fungi_unclassified	Fungi_unclassified	Fungi_unclassified	Fungi_unclassified	Fungi_unclassified
Otu000663	Fungi	Ascomycota	Sordariomycetes	Amphisphaeriales	Pestalotiopsidaceae	Pestalotiopsis
Otu000664	Fungi	Fungi_unclassified	Fungi_unclassified	Fungi_unclassified	Fungi_unclassified	Fungi_unclassified
Otu000665	Fungi	Ascomycota	Sordariomycetes	Hypocreales	Nectriaceae	Fusarium
Otu000666	Fungi	Ascomycota	Eurotiomycetes	Eurotiomycetes_unclassified	Eurotiomycetes_unclassified	Eurotiomycetes_unclassified
Otu000667	Fungi	Ascomycota	Orbiliomycetes	Orbiliales	Orbiliaceae	Orbiliaceae_unclassified
Otu000668	Fungi	Ascomycota	Eurotiomycetes	Chaetothyriales	Herpotrichiellaceae	Herpotrichiellaceae_unclassified
Otu000670	Fungi	Ascomycota	Dothideomycetes	Capnodiales	Paradevriesiaceae	Paradevriesia
Otu000671	Fungi	Basidiomycota	Agaricomycetes	Geastrales	Sphaerobolaceae	Sphaerobolus
Otu000672	Fungi	Ascomycota	Dothideomycetes	Pleosporales	Pleosporales_unclassified	Pleosporales_unclassified
Otu000673	Fungi	Fungi_unclassified	Fungi_unclassified	Fungi_unclassified	Fungi_unclassified	Fungi_unclassified
Otu000674	Fungi	Fungi_unclassified	Fungi_unclassified	Fungi_unclassified	Fungi_unclassified	Fungi_unclassified
Otu000675	Fungi	Basidiomycota	Agaricomycetes	Agaricales	Bolbitiaceae	Conocybe
Otu000677	Fungi	Ascomycota	Orbiliomycetes	Orbiliales	Orbiliaceae	Dactylella
Otu000678	Fungi	Basidiomycota	Agaricomycetes	Agaricales	Stephanosporaceae	Cristinia
Otu000679	Fungi	Ascomycota	Dothideomycetes	Pleosporales	Lentitheciaceae	Poaceascoma
Otu000680	Fungi	Fungi_unclassified	Fungi_unclassified	Fungi_unclassified	Fungi_unclassified	Fungi_unclassified
Otu000681	Fungi	Ascomycota	Sordariomycetes	Glomerellales	Plectosphaerellaceae	Plectosphaerellaceae_unclassified
Otu000682	Fungi	Ascomycota	Dothideomycetes	Pleosporales	Pleosporales_unclassified	Pleosporales_unclassified
Otu000683	Fungi	Fungi_unclassified	Fungi_unclassified	Fungi_unclassified	Fungi_unclassified	Fungi_unclassified
Otu000684	Fungi	Ascomycota	Dothideomycetes	Pleosporales	Sporormiaceae	Westerdykella
Otu000685	Fungi	Fungi_unclassified	Fungi_unclassified	Fungi_unclassified	Fungi_unclassified	Fungi_unclassified
Otu000686	Fungi	Fungi_unclassified	Fungi_unclassified	Fungi_unclassified	Fungi_unclassified	Fungi_unclassified
Otu000688	Fungi	Mortierellomycota	Mortierellomycetes	Mortierellales	Mortierellaceae	Mortierella
Otu000689	Fungi	Ascomycota	Sordariomycetes	Chaetosphaeriales	Chaetosphaeriaceae	Chaetosphaeria
Otu000690	Fungi	Basidiomycota	Agaricomycetes	Sebacinales	Serendipitaceae	Serendipitaceae_unclassified
Otu000691	Fungi	Ascomycota	Dothideomycetes	Pleosporales	Phaeosphaeriaceae	Phaeosphaeriaceae_unclassified
Otu000692	Fungi	Ascomycota	Ascomycota_unclassified	Ascomycota_unclassified	Ascomycota_unclassified	Ascomycota_unclassified
Otu000693	Fungi	Ascomycota	Eurotiomycetes	Eurotiales	Aspergillaceae	Aspergillus
Otu000694	Fungi	Ascomycota	Leotiomycetes	Thelebolales	Pseudeurotiaceae	Pseudogymnoascus
Otu000695	Fungi	Ascomycota	Dothideomycetes	Pleosporales	Pleosporales_unclassified	Pleosporales_unclassified
Otu000696	Fungi	Ascomycota	Sordariomycetes	Coniochaetales	Coniochaetaceae	Coniochaetaceae_unclassified
Otu000697	Fungi	Ascomycota	Dothideomycetes	Pleosporales	Melanommataceae	Sporidesmiella
Otu000698	Fungi	Zoopagomycota	Zoopagomycetes	Zoopagales	unclassified	unclassified
Otu000699	Fungi	Fungi_unclassified	Fungi_unclassified	Fungi_unclassified	Fungi_unclassified	Fungi_unclassified
Otu000700	Fungi	Fungi_unclassified	Fungi_unclassified	Fungi_unclassified	Fungi_unclassified	Fungi_unclassified
Otu000701	Fungi	Ascomycota	Saccharomycetes	Saccharomycetales	Saccharomycetales_unclassified	Saccharomycetales_unclassified
Otu000702	Fungi	Fungi_unclassified	Fungi_unclassified	Fungi_unclassified	Fungi_unclassified	Fungi_unclassified
Otu000703	Fungi	Chytridiomycota	Chytridiomycota_unclassified	Chytridiomycota_unclassified	Chytridiomycota_unclassified	Chytridiomycota_unclassified
Otu000704	Fungi	Fungi_unclassified	Fungi_unclassified	Fungi_unclassified	Fungi_unclassified	Fungi_unclassified
Otu000705	Fungi	Ascomycota	Eurotiomycetes	Eurotiales	Aspergillaceae	Aspergillus
Otu000706	Fungi	Ascomycota	Sordariomycetes	Sordariales	Sordariales_unclassified	Sordariales_unclassified
Otu000707	Fungi	Basidiomycota	Tremellomycetes	Tremellales	Bulleribasidiaceae	Vishniacozyma
Otu000708	Fungi	Ascomycota	Eurotiomycetes	Eurotiales	Aspergillaceae	Aspergillus
Otu000709	Fungi	Ascomycota	Sordariomycetes	Myrmecridiales	Myrmecridiales_fam_Incertae_sedis	Atractospora
Otu000710	Fungi	Mucoromycota	Mucoromycetes	Mucorales	Mucoraceae	Mucor
Otu000711	Fungi	Ascomycota	Eurotiomycetes	Eurotiomycetes_unclassified	Eurotiomycetes_unclassified	Eurotiomycetes_unclassified
Otu000712	Fungi	Ascomycota	Ascomycota_unclassified	Ascomycota_unclassified	Ascomycota_unclassified	Ascomycota_unclassified
Otu000713	Fungi	Ascomycota	Eurotiomycetes	Eurotiales	Aspergillaceae	Aspergillus
Otu000715	Fungi	Ascomycota	Sordariomycetes	Sordariales	Chaetomiaceae	Corynascella
Otu000716	Fungi	Ascomycota	Ascomycota_unclassified	Ascomycota_unclassified	Ascomycota_unclassified	Ascomycota_unclassified
Otu000718	Fungi	Ascomycota	Ascomycota_unclassified	Ascomycota_unclassified	Ascomycota_unclassified	Ascomycota_unclassified
Otu000719	Fungi	Ascomycota	Dothideomycetes	Pleosporales	Pleosporaceae	Pithomyces
Otu000720	Fungi	Fungi_unclassified	Fungi_unclassified	Fungi_unclassified	Fungi_unclassified	Fungi_unclassified
Otu000721	Fungi	Ascomycota	Sordariomycetes	Hypocreales	Stachybotryaceae	Xepicula
Otu000722	Fungi	Ascomycota	Leotiomycetes	Helotiales	Helotiales_unclassified	Helotiales_unclassified
Otu000727	Fungi	unclassified	unclassified	unclassified	unclassified	unclassified
Otu000728	Fungi	Ascomycota	Sordariomycetes	Sordariales	Podosporaceae	Cladorrhinum
Otu000729	Fungi	Ascomycota	Dothideomycetes	Pleosporales	Pleosporales_unclassified	Pleosporales_unclassified
Otu000730	Fungi	Ascomycota	Ascomycota_unclassified	Ascomycota_unclassified	Ascomycota_unclassified	Ascomycota_unclassified
Otu000731	Fungi	Fungi_unclassified	Fungi_unclassified	Fungi_unclassified	Fungi_unclassified	Fungi_unclassified
Otu000732	Fungi	Basidiomycota	Cystobasidiomycetes	Sakaguchiales	Sakaguchiaceae	Sakaguchia
Otu000733	Fungi	Ascomycota	Sordariomycetes	Sordariales	Chaetomiaceae	Chaetomiaceae_unclassified
Otu000734	Fungi	Fungi_unclassified	Fungi_unclassified	Fungi_unclassified	Fungi_unclassified	Fungi_unclassified
Otu000735	Fungi	Ascomycota	Sordariomycetes	Sordariales	Sordariales_unclassified	Sordariales_unclassified
Otu000736	Fungi	Basidiomycota	Agaricomycetes	Agaricomycetes_unclassified	Agaricomycetes_unclassified	Agaricomycetes_unclassified
Otu000738	Fungi	Ascomycota	Orbiliomycetes	unclassified	unclassified	unclassified
Otu000739	Fungi	Ascomycota	Eurotiomycetes	Chaetothyriales	Herpotrichiellaceae	Cladophialophora
Otu000740	Fungi	Fungi_unclassified	Fungi_unclassified	Fungi_unclassified	Fungi_unclassified	Fungi_unclassified
Otu000741	Fungi	Ascomycota	Sordariomycetes	Glomerellales	Plectosphaerellaceae	Gibellulopsis
Otu000742	Fungi	Ascomycota	Sordariomycetes	Glomerellales	Plectosphaerellaceae	Plectosphaerellaceae_unclassified
Otu000743	Fungi	Basidiomycota	Agaricomycetes	Cantharellales	Ceratobasidiaceae	Ceratobasidiaceae_unclassified
Otu000744	Fungi	Ascomycota	Sordariomycetes	Sordariales	Chaetomiaceae	Chaetomiaceae_unclassified
Otu000745	Fungi	Ascomycota	Sordariomycetes	Xylariales	Amphisphaeriaceae	Microdochium
Otu000746	Fungi	Ascomycota	Sordariomycetes	Glomerellales	Plectosphaerellaceae	Plectosphaerellaceae_unclassified
Otu000747	Fungi	Ascomycota	Sordariomycetes	Sordariomycetes_unclassified	Sordariomycetes_unclassified	Sordariomycetes_unclassified
Otu000748	Fungi	Mucoromycota	Mucoromycetes	Mucorales	Mucoraceae	Mucor
Otu000749	Fungi	Fungi_unclassified	Fungi_unclassified	Fungi_unclassified	Fungi_unclassified	Fungi_unclassified
Otu000750	Fungi	Ascomycota	Dothideomycetes	Pleosporales	Periconiaceae	Periconia
Otu000751	Fungi	Ascomycota	Sordariomycetes	Sordariales	Lasiosphaeriaceae	Schizothecium
Otu000752	Fungi	Fungi_unclassified	Fungi_unclassified	Fungi_unclassified	Fungi_unclassified	Fungi_unclassified
Otu000753	Fungi	Fungi_unclassified	Fungi_unclassified	Fungi_unclassified	Fungi_unclassified	Fungi_unclassified
Otu000754	Fungi	Ascomycota	Dothideomycetes	Pleosporales	Periconiaceae	Periconia
Otu000756	Fungi	Ascomycota	Sordariomycetes	Sordariales	Chaetomiaceae	Chaetomidium
Otu000757	Fungi	Ascomycota	Sordariomycetes	Glomerellales	Plectosphaerellaceae	Plectosphaerellaceae_unclassified
Otu000758	Fungi	Fungi_unclassified	Fungi_unclassified	Fungi_unclassified	Fungi_unclassified	Fungi_unclassified
Otu000759	Fungi	Ascomycota	Sordariomycetes	Sordariomycetes_unclassified	Sordariomycetes_unclassified	Sordariomycetes_unclassified
Otu000760	Fungi	Fungi_unclassified	Fungi_unclassified	Fungi_unclassified	Fungi_unclassified	Fungi_unclassified
Otu000764	Fungi	Ascomycota	Dothideomycetes	Pleosporales	Pleosporales_fam_Incertae_sedis	Polyschema
Otu000765	Fungi	Ascomycota	Orbiliomycetes	Orbiliales	Orbiliales_unclassified	Orbiliales_unclassified
Otu000766	Fungi	Ascomycota	Sordariomycetes	Sordariales	Chaetomiaceae	Dichotomopilus
Otu000767	Fungi	Ascomycota	Sordariomycetes	Sordariales	Chaetomiaceae	Chaetomiaceae_unclassified
Otu000768	Fungi	Ascomycota	Sordariomycetes	Sordariomycetes_ord_Incertae_sedis	Junewangiaceae	unclassified
Otu000769	Fungi	Fungi_unclassified	Fungi_unclassified	Fungi_unclassified	Fungi_unclassified	Fungi_unclassified
Otu000772	Fungi	Basidiomycota	Tremellomycetes	Tremellales	Bulleribasidiaceae	Vishniacozyma
Otu000773	Fungi	Ascomycota	Eurotiomycetes	Eurotiales	Aspergillaceae	Aspergillaceae_unclassified
Otu000774	Fungi	Ascomycota	Sordariomycetes	Hypocreales	Bionectriaceae	Nectriella
Otu000775	Fungi	Ascomycota	Ascomycota_unclassified	Ascomycota_unclassified	Ascomycota_unclassified	Ascomycota_unclassified
Otu000776	Fungi	Chytridiomycota	Spizellomycetes	Spizellomycetales	Powellomycetaceae	Fimicolochytrium
Otu000777	Fungi	Ascomycota	Ascomycota_unclassified	Ascomycota_unclassified	Ascomycota_unclassified	Ascomycota_unclassified
Otu000778	Fungi	Fungi_unclassified	Fungi_unclassified	Fungi_unclassified	Fungi_unclassified	Fungi_unclassified
Otu000779	Fungi	Ascomycota	Dothideomycetes	Pleosporales	Phaeosphaeriaceae	Phaeosphaeria
Otu000780	Fungi	Fungi_unclassified	Fungi_unclassified	Fungi_unclassified	Fungi_unclassified	Fungi_unclassified
Otu000781	Fungi	Fungi_unclassified	Fungi_unclassified	Fungi_unclassified	Fungi_unclassified	Fungi_unclassified
Otu000783	Fungi	Basidiomycota	Basidiomycota_unclassified	Basidiomycota_unclassified	Basidiomycota_unclassified	Basidiomycota_unclassified
Otu000784	Fungi	Ascomycota	Eurotiomycetes	Chaetothyriales	Herpotrichiellaceae	Herpotrichiellaceae_unclassified
Otu000785	Fungi	Mucoromycota	Mucoromycetes	Mucorales	Mucoraceae	Actinomucor
Otu000786	Fungi	Ascomycota	Eurotiomycetes	Eurotiales	Aspergillaceae	Talaromyces
Otu000789	Fungi	unclassified	unclassified	unclassified	unclassified	unclassified
Otu000790	Fungi	Ascomycota	Eurotiomycetes	Chaetothyriales	Herpotrichiellaceae	Cladophialophora
Otu000791	Fungi	Ascomycota	Ascomycota_unclassified	Ascomycota_unclassified	Ascomycota_unclassified	Ascomycota_unclassified
Otu000792	Fungi	Fungi_unclassified	Fungi_unclassified	Fungi_unclassified	Fungi_unclassified	Fungi_unclassified
Otu000793	Fungi	Ascomycota	Eurotiomycetes	Chaetothyriales	Cyphellophoraceae	Cyphellophora
Otu000794	Fungi	Fungi_unclassified	Fungi_unclassified	Fungi_unclassified	Fungi_unclassified	Fungi_unclassified
Otu000796	Fungi	Fungi_unclassified	Fungi_unclassified	Fungi_unclassified	Fungi_unclassified	Fungi_unclassified
Otu000797	Fungi	Mortierellomycota	Mortierellomycetes	Mortierellales	Mortierellaceae	Mortierella
Otu000798	Fungi	Ascomycota	Eurotiomycetes	Eurotiales	Aspergillaceae	Talaromyces
Otu000799	Fungi	Basidiomycota	Agaricomycetes	Auriculariales	Auriculariales_unclassified	Auriculariales_unclassified
Otu000801	Fungi	Mortierellomycota	Mortierellomycetes	Mortierellales	Mortierellaceae	Mortierellaceae_unclassified
Otu000803	Fungi	Ascomycota	Ascomycota_unclassified	Ascomycota_unclassified	Ascomycota_unclassified	Ascomycota_unclassified
Otu000804	Fungi	Basidiomycota	Agaricomycetes	Agaricales	Typhulaceae	Typhula
Otu000806	Fungi	Basidiomycota	Agaricomycetes	Cantharellales	Ceratobasidiaceae	Rhizoctonia
Otu000808	Fungi	Fungi_unclassified	Fungi_unclassified	Fungi_unclassified	Fungi_unclassified	Fungi_unclassified
Otu000809	Fungi	Ascomycota	Eurotiomycetes	Chaetothyriales	Cyphellophoraceae	Cyphellophora
Otu000810	Fungi	Fungi_unclassified	Fungi_unclassified	Fungi_unclassified	Fungi_unclassified	Fungi_unclassified
Otu000811	Fungi	Ascomycota	Ascomycota_unclassified	Ascomycota_unclassified	Ascomycota_unclassified	Ascomycota_unclassified
Otu000813	Fungi	Ascomycota	Sordariomycetes	Sordariales	Chaetomiaceae	Chaetomiaceae_unclassified
Otu000815	Fungi	Chytridiomycota	unclassified	unclassified	unclassified	unclassified
Otu000816	Fungi	Ascomycota	Sordariomycetes	Sordariales	Sordariales_unclassified	Sordariales_unclassified
Otu000817	Fungi	Fungi_unclassified	Fungi_unclassified	Fungi_unclassified	Fungi_unclassified	Fungi_unclassified
Otu000819	Fungi	Mortierellomycota	Mortierellomycetes	Mortierellales	Mortierellaceae	Mortierellaceae_unclassified
Otu000820	Fungi	Ascomycota	Dothideomycetes	Tubeufiales	Tubeufiaceae	Tubeufiaceae_unclassified
Otu000821	Fungi	Basidiomycota	Agaricomycetes	Sebacinales	Serendipitaceae	Serendipitaceae_unclassified
Otu000822	Fungi	Ascomycota	Leotiomycetes	Helotiales	Hyaloscyphaceae	Hyaloscypha
Otu000823	Fungi	Fungi_unclassified	Fungi_unclassified	Fungi_unclassified	Fungi_unclassified	Fungi_unclassified
Otu000824	Fungi	Chytridiomycota	Rhizophydiomycetes	Rhizophydiales	Terramycetaceae	Boothiomyces
Otu000825	Fungi	Fungi_unclassified	Fungi_unclassified	Fungi_unclassified	Fungi_unclassified	Fungi_unclassified
Otu000826	Fungi	Ascomycota	Dothideomycetes	Pleosporales	Melanommataceae	Sporidesmiella
Otu000827	Fungi	Fungi_unclassified	Fungi_unclassified	Fungi_unclassified	Fungi_unclassified	Fungi_unclassified
Otu000829	Fungi	Ascomycota	Dothideomycetes	Pleosporales	Phaeosphaeriaceae	Phaeosphaeria
Otu000830	Fungi	Fungi_unclassified	Fungi_unclassified	Fungi_unclassified	Fungi_unclassified	Fungi_unclassified
Otu000831	Fungi	Ascomycota	Ascomycota_unclassified	Ascomycota_unclassified	Ascomycota_unclassified	Ascomycota_unclassified
Otu000832	Fungi	Ascomycota	Sordariomycetes	Sordariales	Chaetomiaceae	Chaetomiaceae_unclassified
Otu000833	Fungi	Ascomycota	Lecanoromycetes	Peltigerales	Pannariaceae	Pannariaceae_unclassified
Otu000834	Fungi	Basidiomycota	Agaricomycetes	Cantharellales	Ceratobasidiaceae	Ceratobasidiaceae_unclassified
Otu000835	Fungi	Ascomycota	Leotiomycetes	Thelebolales	Thelebolales_unclassified	Thelebolales_unclassified
Otu000836	Fungi	Fungi_unclassified	Fungi_unclassified	Fungi_unclassified	Fungi_unclassified	Fungi_unclassified
Otu000837	Fungi	Fungi_unclassified	Fungi_unclassified	Fungi_unclassified	Fungi_unclassified	Fungi_unclassified
Otu000838	Fungi	Fungi_unclassified	Fungi_unclassified	Fungi_unclassified	Fungi_unclassified	Fungi_unclassified
Otu000839	Fungi	Ascomycota	Dothideomycetes	Tubeufiales	Tubeufiaceae	Neohelicosporium
Otu000840	Fungi	Fungi_unclassified	Fungi_unclassified	Fungi_unclassified	Fungi_unclassified	Fungi_unclassified
Otu000842	Fungi	Fungi_unclassified	Fungi_unclassified	Fungi_unclassified	Fungi_unclassified	Fungi_unclassified
Otu000845	Fungi	Ascomycota	Ascomycota_unclassified	Ascomycota_unclassified	Ascomycota_unclassified	Ascomycota_unclassified
Otu000846	Fungi	Chytridiomycota	Rhizophlyctidomycetes	Rhizophlyctidales	Rhizophlyctidaceae	Rhizophlyctidaceae_unclassified
Otu000847	Fungi	Basidiomycota	Agaricomycetes	Agaricales	Psathyrellaceae	Psathyrella
Otu000848	Fungi	Ascomycota	Sordariomycetes	Sordariales	Chaetomiaceae	Chaetomiaceae_unclassified
Otu000849	Fungi	Fungi_unclassified	Fungi_unclassified	Fungi_unclassified	Fungi_unclassified	Fungi_unclassified
Otu000851	Fungi	Ascomycota	Ascomycota_unclassified	Ascomycota_unclassified	Ascomycota_unclassified	Ascomycota_unclassified
Otu000854	Fungi	Basidiomycota	Agaricomycetes	Gomphales	unclassified	unclassified
Otu000855	Fungi	Ascomycota	Dothideomycetes	Venturiales	Sympoventuriaceae	Scolecobasidium
Otu000856	Fungi	Basidiomycota	Tremellomycetes	Tremellales	Bulleraceae	Bullera
Otu000857	Fungi	unclassified	unclassified	unclassified	unclassified	unclassified
Otu000858	Fungi	Ascomycota	Eurotiomycetes	Chaetothyriales	Cyphellophoraceae	Cyphellophora
Otu000859	Fungi	Ascomycota	Dothideomycetes	Dothideales	Saccotheciaceae	Aureobasidium
Otu000860	Fungi	Ascomycota	Sordariomycetes	Sordariales	Sordariales_unclassified	Sordariales_unclassified
Otu000862	Fungi	Fungi_unclassified	Fungi_unclassified	Fungi_unclassified	Fungi_unclassified	Fungi_unclassified
Otu000863	Fungi	Fungi_unclassified	Fungi_unclassified	Fungi_unclassified	Fungi_unclassified	Fungi_unclassified
Otu000864	Fungi	Ascomycota	Eurotiomycetes	Eurotiomycetes_unclassified	Eurotiomycetes_unclassified	Eurotiomycetes_unclassified
Otu000865	Fungi	Chytridiomycota	Spizellomycetes	Spizellomycetales	Powellomycetaceae	Fimicolochytrium
Otu000866	Fungi	Fungi_unclassified	Fungi_unclassified	Fungi_unclassified	Fungi_unclassified	Fungi_unclassified
Otu000867	Fungi	Basidiomycota	Agaricomycetes	Cantharellales	Ceratobasidiaceae	Ceratobasidiaceae_unclassified
Otu000868	Fungi	Ascomycota	Sordariomycetes	Sordariomycetes_unclassified	Sordariomycetes_unclassified	Sordariomycetes_unclassified
Otu000869	Fungi	Ascomycota	Sordariomycetes	Chaetosphaeriales	Chaetosphaeriaceae	Chaetosphaeriaceae_unclassified
Otu000870	Fungi	Fungi_unclassified	Fungi_unclassified	Fungi_unclassified	Fungi_unclassified	Fungi_unclassified
Otu000871	Fungi	Ascomycota	Sordariomycetes	Hypocreales	Ophiocordycipitaceae	Hirsutella
Otu000872	Fungi	Ascomycota	Dothideomycetes	Pleosporales	Cucurbitariaceae	Pyrenochaetopsis
Otu000874	Fungi	Ascomycota	Eurotiomycetes	Eurotiales	Aspergillaceae	Talaromyces
Otu000876	Fungi	Fungi_unclassified	Fungi_unclassified	Fungi_unclassified	Fungi_unclassified	Fungi_unclassified
Otu000877	Fungi	Fungi_unclassified	Fungi_unclassified	Fungi_unclassified	Fungi_unclassified	Fungi_unclassified
Otu000878	Fungi	Ascomycota	Sordariomycetes	Xylariales	Xylariales_fam_Incertae_sedis	Fusidium
Otu000879	Fungi	Ascomycota	Leotiomycetes	Helotiales	Gelatinodiscaceae	Neobulgaria
Otu000880	Fungi	Ascomycota	Ascomycota_unclassified	Ascomycota_unclassified	Ascomycota_unclassified	Ascomycota_unclassified
Otu000881	Fungi	Ascomycota	Sordariomycetes	Hypocreales	Cordycipitaceae	Beauveria
Otu000882	Fungi	Ascomycota	Leotiomycetes	Helotiales	Helotiaceae	Scytalidium
Otu000884	Fungi	Ascomycota	Dothideomycetes	Venturiales	Sympoventuriaceae	Scolecobasidium
Otu000885	Fungi	Basidiomycota	Agaricomycetes	Cantharellales	Ceratobasidiaceae	Ceratobasidiaceae_unclassified
Otu000886	Fungi	Ascomycota	Dothideomycetes	Pleosporales	Pleosporales_unclassified	Pleosporales_unclassified
Otu000888	Fungi	Ascomycota	Ascomycota_unclassified	Ascomycota_unclassified	Ascomycota_unclassified	Ascomycota_unclassified
Otu000889	Fungi	Ascomycota	Eurotiomycetes	Onygenales	Onygenales_unclassified	Onygenales_unclassified
Otu000890	Fungi	Ascomycota	Pezizomycetes	Pezizales	Pezizaceae	Iodophanus
Otu000891	Fungi	Chytridiomycota	Chytridiomycota_unclassified	Chytridiomycota_unclassified	Chytridiomycota_unclassified	Chytridiomycota_unclassified
Otu000892	Fungi	Ascomycota	Leotiomycetes	Helotiales	Helotiales_unclassified	Helotiales_unclassified
Otu000894	Fungi	Ascomycota	Dothideomycetes	Pleosporales	Cucurbitariaceae	Pyrenochaeta
Otu000895	Fungi	Basidiomycota	Tremellomycetes	Filobasidiales	Filobasidiaceae	Naganishia
Otu000897	Fungi	Ascomycota	Dothideomycetes	Tubeufiales	Tubeufiaceae	Neohelicomyces
Otu000898	Fungi	Ascomycota	Sordariomycetes	Sordariomycetes_unclassified	Sordariomycetes_unclassified	Sordariomycetes_unclassified
Otu000899	Fungi	Fungi_unclassified	Fungi_unclassified	Fungi_unclassified	Fungi_unclassified	Fungi_unclassified
Otu000900	Fungi	Basidiomycota	Agaricomycetes	Agaricales	Psathyrellaceae	Psathyrella
Otu000901	Fungi	Fungi_unclassified	Fungi_unclassified	Fungi_unclassified	Fungi_unclassified	Fungi_unclassified
Otu000902	Fungi	Ascomycota	Dothideomycetes	Venturiales	Sympoventuriaceae	Veronaeopsis
Otu000904	Fungi	Fungi_unclassified	Fungi_unclassified	Fungi_unclassified	Fungi_unclassified	Fungi_unclassified
Otu000905	Fungi	Ascomycota	Sordariomycetes	Coniochaetales	Coniochaetaceae	Coniochaeta
Otu000906	Fungi	Ascomycota	Eurotiomycetes	Eurotiomycetes_unclassified	Eurotiomycetes_unclassified	Eurotiomycetes_unclassified
Otu000907	Fungi	Ascomycota	Pezizomycotina_cls_Incertae_sedis	Pezizomycotina_ord_Incertae_sedis	Pezizomycotina_fam_Incertae_sedis	Polylobatispora
Otu000908	Fungi	Ascomycota	Dothideomycetes	Pleosporales	Pleosporaceae	Bipolaris
Otu000909	Fungi	Ascomycota	Ascomycota_unclassified	Ascomycota_unclassified	Ascomycota_unclassified	Ascomycota_unclassified
Otu000910	Fungi	Basidiomycota	Tremellomycetes	Tremellales	Cryptococcaceae	Cryptococcus
Otu000911	Fungi	Fungi_unclassified	Fungi_unclassified	Fungi_unclassified	Fungi_unclassified	Fungi_unclassified
Otu000912	Fungi	Ascomycota	Eurotiomycetes	Chaetothyriales	Cyphellophoraceae	Cyphellophora
Otu000913	Fungi	Ascomycota	Sordariomycetes	Glomerellales	Glomerellaceae	Colletotrichum
Otu000914	Fungi	Ascomycota	Sordariomycetes	Hypocreales	Bionectriaceae	Valsonectria
Otu000915	Fungi	Mucoromycota	Mucoromycetes	Mucorales	Choanephoraceae	Blakeslea
Otu000916	Fungi	Ascomycota	Ascomycota_unclassified	Ascomycota_unclassified	Ascomycota_unclassified	Ascomycota_unclassified
Otu000917	Fungi	Ascomycota	Sordariomycetes	Sordariomycetes_ord_Incertae_sedis	Junewangiaceae	unclassified
Otu000918	Fungi	Ascomycota	Dothideomycetes	Pleosporales	Pleosporaceae	Curvularia
Otu000919	Fungi	Mortierellomycota	Mortierellomycetes	Mortierellales	Mortierellaceae	Mortierellaceae_unclassified
Otu000920	Fungi	Ascomycota	Sordariomycetes	Hypocreales	Hypocreales_unclassified	Hypocreales_unclassified
Otu000921	Fungi	Ascomycota	Sordariomycetes	Sordariales	Sordariales_unclassified	Sordariales_unclassified
Otu000923	Fungi	Fungi_unclassified	Fungi_unclassified	Fungi_unclassified	Fungi_unclassified	Fungi_unclassified
Otu000924	Fungi	Basidiomycota	Agaricomycetes	Agaricales	Psathyrellaceae	Psathyrellaceae_unclassified
Otu000925	Fungi	Ascomycota	Sordariomycetes	Hypocreales	Hypocreales_unclassified	Hypocreales_unclassified
Otu000926	Fungi	Fungi_unclassified	Fungi_unclassified	Fungi_unclassified	Fungi_unclassified	Fungi_unclassified
Otu000927	Fungi	Fungi_unclassified	Fungi_unclassified	Fungi_unclassified	Fungi_unclassified	Fungi_unclassified
Otu000928	Fungi	Fungi_unclassified	Fungi_unclassified	Fungi_unclassified	Fungi_unclassified	Fungi_unclassified
Otu000929	Fungi	Ascomycota	Dothideomycetes	Microthyriales	Microthyriaceae	Antidactylaria
Otu000930	Fungi	Fungi_unclassified	Fungi_unclassified	Fungi_unclassified	Fungi_unclassified	Fungi_unclassified
Otu000931	Fungi	Chytridiomycota	Spizellomycetes	Spizellomycetales	unclassified	unclassified
Otu000932	Fungi	Basidiomycota	Cystobasidiomycetes	Cystobasidiales	Cystobasidiaceae	Occultifur
Otu000933	Fungi	Ascomycota	Dothideomycetes	Pleosporales	Pleosporales_unclassified	Pleosporales_unclassified
Otu000934	Fungi	Ascomycota	Ascomycota_unclassified	Ascomycota_unclassified	Ascomycota_unclassified	Ascomycota_unclassified
Otu000935	Fungi	Chytridiomycota	Spizellomycetes	Spizellomycetales	Spizellomycetaceae	unclassified
Otu000938	Fungi	Ascomycota	Eurotiomycetes	Eurotiales	Aspergillaceae	Penicillium
Otu000939	Fungi	Mortierellomycota	Mortierellomycota_unclassified	Mortierellomycota_unclassified	Mortierellomycota_unclassified	Mortierellomycota_unclassified
Otu000940	Fungi	Basidiomycota	Tremellomycetes	Tremellomycetes_unclassified	Tremellomycetes_unclassified	Tremellomycetes_unclassified
Otu000941	Fungi	Basidiomycota	Agaricomycetes	Polyporales	Irpicaceae	Gloeoporus
Otu000942	Fungi	Ascomycota	Sordariomycetes	Diaporthales	Diaporthaceae	Stenocarpella
Otu000943	Fungi	Mortierellomycota	Mortierellomycetes	Mortierellales	Mortierellaceae	Mortierellaceae_unclassified
Otu000944	Fungi	Fungi_unclassified	Fungi_unclassified	Fungi_unclassified	Fungi_unclassified	Fungi_unclassified
Otu000945	Fungi	Basidiomycota	Agaricomycetes	Cantharellales	Hydnaceae	Burgoa
Otu000946	Fungi	unclassified	unclassified	unclassified	unclassified	unclassified
Otu000947	Fungi	Fungi_unclassified	Fungi_unclassified	Fungi_unclassified	Fungi_unclassified	Fungi_unclassified
Otu000948	Fungi	Ascomycota	Sordariomycetes	Hypocreales	Bionectriaceae	Gliomastix
Otu000949	Fungi	Ascomycota	Orbiliomycetes	Orbiliales	Orbiliales_unclassified	Orbiliales_unclassified
Otu000950	Fungi	Ascomycota	Sordariomycetes	Hypocreales	Hypocreales_unclassified	Hypocreales_unclassified
Otu000951	Fungi	Basidiomycota	Agaricomycetes	Geastrales	Sphaerobolaceae	Sphaerobolus
Otu000952	Fungi	Ascomycota	Sordariomycetes	Sordariomycetes_unclassified	Sordariomycetes_unclassified	Sordariomycetes_unclassified
Otu000953	Fungi	Ascomycota	Dothideomycetes	Pleosporales	Delitschiaceae	unclassified
Otu000954	Fungi	Ascomycota	Dothideomycetes	Pleosporales	Lentitheciaceae	Keissleriella
Otu000955	Fungi	Mortierellomycota	Mortierellomycetes	Mortierellales	Mortierellaceae	Mortierellaceae_unclassified
Otu000956	Fungi	Fungi_unclassified	Fungi_unclassified	Fungi_unclassified	Fungi_unclassified	Fungi_unclassified
Otu000957	Fungi	Ascomycota	Sordariomycetes	Sordariales	Chaetomiaceae	Chaetomiaceae_unclassified
Otu000958	Fungi	Fungi_unclassified	Fungi_unclassified	Fungi_unclassified	Fungi_unclassified	Fungi_unclassified
Otu000959	Fungi	Fungi_unclassified	Fungi_unclassified	Fungi_unclassified	Fungi_unclassified	Fungi_unclassified
Otu000960	Fungi	Fungi_unclassified	Fungi_unclassified	Fungi_unclassified	Fungi_unclassified	Fungi_unclassified
Otu000961	Fungi	Ascomycota	Pezizomycetes	Pezizales	Ascobolaceae	Ascobolus
Otu000963	Fungi	Ascomycota	Sordariomycetes	Hypocreales	Stachybotryaceae	Myrothecium
Otu000964	Fungi	Fungi_unclassified	Fungi_unclassified	Fungi_unclassified	Fungi_unclassified	Fungi_unclassified
Otu000965	Fungi	Fungi_unclassified	Fungi_unclassified	Fungi_unclassified	Fungi_unclassified	Fungi_unclassified
Otu000966	Fungi	Ascomycota	Ascomycota_unclassified	Ascomycota_unclassified	Ascomycota_unclassified	Ascomycota_unclassified
Otu000967	Fungi	Ascomycota	Sordariomycetes	Sordariales	Sordariales_unclassified	Sordariales_unclassified
Otu000968	Fungi	Ascomycota	Ascomycota_unclassified	Ascomycota_unclassified	Ascomycota_unclassified	Ascomycota_unclassified
Otu000969	Fungi	Ascomycota	Dothideomycetes	Pleosporales	Pleosporales_unclassified	Pleosporales_unclassified
Otu000970	Fungi	Chytridiomycota	Rhizophydiomycetes	Rhizophydiales	unclassified	unclassified
Otu000971	Fungi	Fungi_unclassified	Fungi_unclassified	Fungi_unclassified	Fungi_unclassified	Fungi_unclassified
Otu000973	Fungi	Ascomycota	Eurotiomycetes	Chaetothyriales	Herpotrichiellaceae	Cladophialophora
Otu000977	Fungi	Ascomycota	Eurotiomycetes	Eurotiales	Aspergillaceae	Aspergillus
Otu000978	Fungi	Basidiomycota	Agaricomycetes	Corticiales	Corticiaceae	Waitea
Otu000979	Fungi	Ascomycota	Orbiliomycetes	Orbiliales	unclassified	unclassified
Otu000980	Fungi	unclassified	unclassified	unclassified	unclassified	unclassified
Otu000981	Fungi	Ascomycota	Orbiliomycetes	Orbiliales	Orbiliaceae	Orbiliaceae_unclassified
Otu000982	Fungi	Ascomycota	Eurotiomycetes	Chaetothyriales	Herpotrichiellaceae	Exophiala
Otu000983	Fungi	Ascomycota	Leotiomycetes	Helotiales	Tricladiaceae	Tricladium
Otu000984	Fungi	Fungi_unclassified	Fungi_unclassified	Fungi_unclassified	Fungi_unclassified	Fungi_unclassified
Otu000986	Fungi	Ascomycota	Dothideomycetes	Pleosporales	Pleosporaceae	Pyrenophora
Otu000987	Fungi	Fungi_unclassified	Fungi_unclassified	Fungi_unclassified	Fungi_unclassified	Fungi_unclassified
Otu000988	Fungi	Mortierellomycota	Mortierellomycetes	Mortierellales	Mortierellaceae	Mortierella
Otu000990	Fungi	Basidiomycota	Tremellomycetes	Tremellales	Bulleribasidiaceae	Vishniacozyma
Otu000991	Fungi	Ascomycota	Dothideomycetes	Venturiales	Sympoventuriaceae	Scolecobasidium
Otu000992	Fungi	Ascomycota	Lecanoromycetes	Ostropales	Stictidaceae	Karstenia
Otu000993	Fungi	Fungi_unclassified	Fungi_unclassified	Fungi_unclassified	Fungi_unclassified	Fungi_unclassified
Otu000995	Fungi	Fungi_unclassified	Fungi_unclassified	Fungi_unclassified	Fungi_unclassified	Fungi_unclassified
Otu000996	Fungi	Basidiomycota	Agaricomycetes	Agaricales	Mycenaceae	Mycena
Otu000997	Fungi	Basidiomycota	Agaricomycetes	Polyporales	Irpicaceae	Gloeoporus
Otu000998	Fungi	Ascomycota	Sordariomycetes	Magnaporthales	Ophioceraceae	Ophioceraceae_unclassified
Otu000999	Fungi	Ascomycota	Saccharomycetes	Saccharomycetales	unclassified	unclassified
Otu001001	Fungi	Ascomycota	Eurotiomycetes	Eurotiomycetes_unclassified	Eurotiomycetes_unclassified	Eurotiomycetes_unclassified
Otu001003	Fungi	Ascomycota	Sordariomycetes	Glomerellales	Plectosphaerellaceae	Brunneomyces
Otu001006	Fungi	Basidiomycota	Agaricomycetes	Agaricomycetes_unclassified	Agaricomycetes_unclassified	Agaricomycetes_unclassified
Otu001007	Fungi	Ascomycota	Sordariomycetes	Sordariales	Chaetomiaceae	Chaetomiaceae_unclassified
Otu001008	Fungi	Fungi_unclassified	Fungi_unclassified	Fungi_unclassified	Fungi_unclassified	Fungi_unclassified
Otu001009	Fungi	Ascomycota	Pezizomycotina_cls_Incertae_sedis	Pezizomycotina_ord_Incertae_sedis	Pezizomycotina_fam_Incertae_sedis	Triscelophorus
Otu001010	Fungi	Fungi_unclassified	Fungi_unclassified	Fungi_unclassified	Fungi_unclassified	Fungi_unclassified
Otu001011	Fungi	Ascomycota	Dothideomycetes	Pleosporales	Pleosporales_unclassified	Pleosporales_unclassified
Otu001013	Fungi	Fungi_unclassified	Fungi_unclassified	Fungi_unclassified	Fungi_unclassified	Fungi_unclassified
Otu001014	Fungi	Ascomycota	Ascomycota_unclassified	Ascomycota_unclassified	Ascomycota_unclassified	Ascomycota_unclassified
Otu001015	Fungi	Ascomycota	Sordariomycetes	Hypocreales	Hypocreaceae	Kiflimonium
Otu001016	Fungi	Ascomycota	Ascomycota_unclassified	Ascomycota_unclassified	Ascomycota_unclassified	Ascomycota_unclassified
Otu001017	Fungi	Glomeromycota	Paraglomeromycetes	Paraglomerales	Pervetustaceae	Pervetustus
Otu001018	Fungi	Ascomycota	Sordariomycetes	Hypocreales	Nectriaceae	Fusarium
Otu001019	Fungi	Fungi_unclassified	Fungi_unclassified	Fungi_unclassified	Fungi_unclassified	Fungi_unclassified
Otu001021	Fungi	Basidiomycota	Cystobasidiomycetes	Cystobasidiales	Cystobasidiaceae	Occultifur
Otu001022	Fungi	Basidiomycota	Tremellomycetes	Tremellales	Trimorphomycetaceae	Saitozyma
Otu001023	Fungi	Ascomycota	Ascomycota_unclassified	Ascomycota_unclassified	Ascomycota_unclassified	Ascomycota_unclassified
Otu001025	Fungi	Fungi_unclassified	Fungi_unclassified	Fungi_unclassified	Fungi_unclassified	Fungi_unclassified
Otu001026	Fungi	Fungi_unclassified	Fungi_unclassified	Fungi_unclassified	Fungi_unclassified	Fungi_unclassified
Otu001028	Fungi	Fungi_unclassified	Fungi_unclassified	Fungi_unclassified	Fungi_unclassified	Fungi_unclassified
Otu001029	Fungi	Ascomycota	Ascomycota_unclassified	Ascomycota_unclassified	Ascomycota_unclassified	Ascomycota_unclassified
Otu001031	Fungi	Ascomycota	Dothideomycetes	Pleosporales	Pleosporales_unclassified	Pleosporales_unclassified
Otu001032	Fungi	Ascomycota	Dothideomycetes	Pleosporales	Dictyosporiaceae	Dictyosporiaceae_unclassified
Otu001034	Fungi	Ascomycota	Ascomycota_unclassified	Ascomycota_unclassified	Ascomycota_unclassified	Ascomycota_unclassified
Otu001038	Fungi	Fungi_unclassified	Fungi_unclassified	Fungi_unclassified	Fungi_unclassified	Fungi_unclassified
Otu001039	Fungi	Fungi_unclassified	Fungi_unclassified	Fungi_unclassified	Fungi_unclassified	Fungi_unclassified
Otu001041	Fungi	Fungi_unclassified	Fungi_unclassified	Fungi_unclassified	Fungi_unclassified	Fungi_unclassified
Otu001042	Fungi	Basidiomycota	Microbotryomycetes	Sporidiobolales	Sporidiobolaceae	Rhodotorula
Otu001044	Fungi	Fungi_unclassified	Fungi_unclassified	Fungi_unclassified	Fungi_unclassified	Fungi_unclassified
Otu001046	Fungi	Ascomycota	Dothideomycetes	Pleosporales	Phaeosphaeriaceae	Leptospora
Otu001047	Fungi	unclassified	unclassified	unclassified	unclassified	unclassified
Otu001048	Fungi	unclassified	unclassified	unclassified	unclassified	unclassified
Otu001050	Fungi	Fungi_unclassified	Fungi_unclassified	Fungi_unclassified	Fungi_unclassified	Fungi_unclassified
Otu001051	Fungi	Chytridiomycota	Chytridiomycota_unclassified	Chytridiomycota_unclassified	Chytridiomycota_unclassified	Chytridiomycota_unclassified
Otu001052	Fungi	Fungi_unclassified	Fungi_unclassified	Fungi_unclassified	Fungi_unclassified	Fungi_unclassified
Otu001053	Fungi	Fungi_unclassified	Fungi_unclassified	Fungi_unclassified	Fungi_unclassified	Fungi_unclassified
Otu001054	Fungi	Fungi_unclassified	Fungi_unclassified	Fungi_unclassified	Fungi_unclassified	Fungi_unclassified
Otu001055	Fungi	Fungi_unclassified	Fungi_unclassified	Fungi_unclassified	Fungi_unclassified	Fungi_unclassified
Otu001056	Fungi	Fungi_unclassified	Fungi_unclassified	Fungi_unclassified	Fungi_unclassified	Fungi_unclassified
Otu001057	Fungi	Ascomycota	Sordariomycetes	Hypocreales	Bionectriaceae	Bionectriaceae_unclassified
Otu001058	Fungi	Ascomycota	Sordariomycetes	Hypocreales	Clavicipitaceae	Metarhizium
Otu001059	Fungi	Ascomycota	Dothideomycetes	Tubeufiales	unclassified	unclassified
Otu001060	Fungi	Fungi_unclassified	Fungi_unclassified	Fungi_unclassified	Fungi_unclassified	Fungi_unclassified
Otu001061	Fungi	Ascomycota	Leotiomycetes	Helotiales	Helotiales_unclassified	Helotiales_unclassified
Otu001062	Fungi	Ascomycota	Ascomycota_unclassified	Ascomycota_unclassified	Ascomycota_unclassified	Ascomycota_unclassified
Otu001063	Fungi	Ascomycota	Sordariomycetes	Sordariales	Lasiosphaeriaceae	Lasiosphaeriaceae_unclassified
Otu001064	Fungi	unclassified	unclassified	unclassified	unclassified	unclassified
Otu001066	Fungi	Ascomycota	Sordariomycetes	Hypocreales	Nectriaceae	Nectriaceae_unclassified
Otu001067	Fungi	Ascomycota	Ascomycota_unclassified	Ascomycota_unclassified	Ascomycota_unclassified	Ascomycota_unclassified
Otu001068	Fungi	Fungi_unclassified	Fungi_unclassified	Fungi_unclassified	Fungi_unclassified	Fungi_unclassified
Otu001069	Fungi	Ascomycota	Sordariomycetes	Hypocreales	Clavicipitaceae	Keithomyces
Otu001070	Fungi	Fungi_unclassified	Fungi_unclassified	Fungi_unclassified	Fungi_unclassified	Fungi_unclassified
Otu001071	Fungi	Fungi_unclassified	Fungi_unclassified	Fungi_unclassified	Fungi_unclassified	Fungi_unclassified
Otu001073	Fungi	Fungi_unclassified	Fungi_unclassified	Fungi_unclassified	Fungi_unclassified	Fungi_unclassified
Otu001075	Fungi	Ascomycota	Leotiomycetes	Helotiales	Tricladiaceae	Tricladium
Otu001076	Fungi	Basidiomycota	Agaricomycetes	Corticiales	Corticiaceae	Limonomyces
Otu001077	Fungi	Ascomycota	Eurotiomycetes	Chaetothyriales	Herpotrichiellaceae	Cladophialophora
Otu001078	Fungi	Ascomycota	Eurotiomycetes	Eurotiales	Aspergillaceae	Phialomyces
Otu001079	Fungi	Ascomycota	Sordariomycetes	Hypocreales	Nectriaceae	Fusarium
Otu001080	Fungi	Fungi_unclassified	Fungi_unclassified	Fungi_unclassified	Fungi_unclassified	Fungi_unclassified
Otu001081	Fungi	Fungi_unclassified	Fungi_unclassified	Fungi_unclassified	Fungi_unclassified	Fungi_unclassified
Otu001082	Fungi	Fungi_unclassified	Fungi_unclassified	Fungi_unclassified	Fungi_unclassified	Fungi_unclassified
Otu001084	Fungi	Ascomycota	Sordariomycetes	Hypocreales	Hypocreaceae	Trichoderma
Otu001085	Fungi	Ascomycota	Sordariomycetes	Glomerellales	Plectosphaerellaceae	Plectosphaerellaceae_unclassified
Otu001086	Fungi	Basidiomycota	Agaricomycetes	Cantharellales	Hydnaceae	Sistotrema
Otu001087	Fungi	Ascomycota	Sordariomycetes	Glomerellales	Plectosphaerellaceae	Plectosphaerellaceae_unclassified
Otu001089	Fungi	Ascomycota	Eurotiomycetes	Eurotiomycetes_unclassified	Eurotiomycetes_unclassified	Eurotiomycetes_unclassified
Otu001090	Fungi	Fungi_unclassified	Fungi_unclassified	Fungi_unclassified	Fungi_unclassified	Fungi_unclassified
Otu001091	Fungi	unclassified	unclassified	unclassified	unclassified	unclassified
Otu001092	Fungi	Ascomycota	Sordariomycetes	Hypocreales	Hypocreales_unclassified	Hypocreales_unclassified
Otu001093	Fungi	Ascomycota	Sordariomycetes	Microascales	Halosphaeriaceae	Halosphaeriaceae_unclassified
Otu001094	Fungi	Ascomycota	Sordariomycetes	Hypocreales	Hypocreales_unclassified	Hypocreales_unclassified
Otu001095	Fungi	unclassified	unclassified	unclassified	unclassified	unclassified
Otu001097	Fungi	Fungi_unclassified	Fungi_unclassified	Fungi_unclassified	Fungi_unclassified	Fungi_unclassified
Otu001098	Fungi	Fungi_unclassified	Fungi_unclassified	Fungi_unclassified	Fungi_unclassified	Fungi_unclassified
Otu001099	Fungi	Ascomycota	Sordariomycetes	Hypocreales	Nectriaceae	Fusarium
Otu001100	Fungi	Fungi_unclassified	Fungi_unclassified	Fungi_unclassified	Fungi_unclassified	Fungi_unclassified
Otu001101	Fungi	unclassified	unclassified	unclassified	unclassified	unclassified
Otu001103	Fungi	Fungi_unclassified	Fungi_unclassified	Fungi_unclassified	Fungi_unclassified	Fungi_unclassified
Otu001104	Fungi	Ascomycota	Sordariomycetes	Hypocreales	Ophiocordycipitaceae	Haptocillium
Otu001105	Fungi	Ascomycota	Dothideomycetes	Pleosporales	Dictyosporiaceae	Neodendryphiella
Otu001106	Fungi	Ascomycota	Dothideomycetes	Pleosporales	Phaeosphaeriaceae	Phaeosphaeriaceae_unclassified
Otu001107	Fungi	Ascomycota	Dothideomycetes	Pleosporales	Didymosphaeriaceae	Didymosphaeriaceae_unclassified
Otu001108	Fungi	Ascomycota	Eurotiomycetes	Eurotiales	Aspergillaceae	Aspergillus
Otu001109	Fungi	Ascomycota	Sordariomycetes	Glomerellales	Plectosphaerellaceae	Verticillium
Otu001111	Fungi	Basidiomycota	Tremellomycetes	Tremellales	Bulleribasidiaceae	Hannaella
Otu001112	Fungi	Chytridiomycota	Spizellomycetes	Spizellomycetales	unclassified	unclassified
Otu001113	Fungi	Fungi_unclassified	Fungi_unclassified	Fungi_unclassified	Fungi_unclassified	Fungi_unclassified
Otu001115	Fungi	Chytridiomycota	unclassified	unclassified	unclassified	unclassified
Otu001116	Fungi	Fungi_unclassified	Fungi_unclassified	Fungi_unclassified	Fungi_unclassified	Fungi_unclassified
Otu001117	Fungi	Mortierellomycota	Mortierellomycetes	Mortierellales	Mortierellaceae	Mortierella
Otu001118	Fungi	Ascomycota	Dothideomycetes	Capnodiales	Neodevriesiaceae	Neodevriesia
Otu001119	Fungi	Fungi_unclassified	Fungi_unclassified	Fungi_unclassified	Fungi_unclassified	Fungi_unclassified
Otu001120	Fungi	Fungi_unclassified	Fungi_unclassified	Fungi_unclassified	Fungi_unclassified	Fungi_unclassified
Otu001122	Fungi	Fungi_unclassified	Fungi_unclassified	Fungi_unclassified	Fungi_unclassified	Fungi_unclassified
Otu001123	Fungi	Ascomycota	Eurotiomycetes	Eurotiales	Aspergillaceae	Aspergillaceae_unclassified
Otu001124	Fungi	Ascomycota	Sordariomycetes	Hypocreales	Nectriaceae	Stylonectria
Otu001125	Fungi	Fungi_unclassified	Fungi_unclassified	Fungi_unclassified	Fungi_unclassified	Fungi_unclassified
Otu001126	Fungi	Basidiomycota	Tremellomycetes	Cystofilobasidiales	Cystofilobasidiaceae	Cystofilobasidium
Otu001127	Fungi	Ascomycota	Sordariomycetes	Glomerellales	Plectosphaerellaceae	Plectosphaerellaceae_unclassified
Otu001128	Fungi	Fungi_unclassified	Fungi_unclassified	Fungi_unclassified	Fungi_unclassified	Fungi_unclassified
Otu001130	Fungi	Ascomycota	Eurotiomycetes	Eurotiomycetes_unclassified	Eurotiomycetes_unclassified	Eurotiomycetes_unclassified
Otu001131	Fungi	Ascomycota	Sordariomycetes	Hypocreales	Hypocreales_fam_Incertae_sedis	Chlamydocillium
Otu001132	Fungi	Fungi_unclassified	Fungi_unclassified	Fungi_unclassified	Fungi_unclassified	Fungi_unclassified
Otu001133	Fungi	Chytridiomycota	Spizellomycetes	Spizellomycetales	unclassified	unclassified
Otu001134	Fungi	Ascomycota	Dothideomycetes	Pleosporales	Torulaceae	Torula
Otu001135	Fungi	Fungi_unclassified	Fungi_unclassified	Fungi_unclassified	Fungi_unclassified	Fungi_unclassified
Otu001136	Fungi	Ascomycota	Dothideomycetes	Pleosporales	Pleosporaceae	Curvularia
Otu001137	Fungi	Ascomycota	Eurotiomycetes	Onygenales	Onygenaceae	Onygenaceae_unclassified
Otu001139	Fungi	unclassified	unclassified	unclassified	unclassified	unclassified
Otu001140	Fungi	Ascomycota	Pezizomycotina_cls_Incertae_sedis	Pezizomycotina_ord_Incertae_sedis	Pezizomycotina_fam_Incertae_sedis	Hormiactis
Otu001141	Fungi	Ascomycota	Eurotiomycetes	Eurotiales	Eurotiales_unclassified	Eurotiales_unclassified
Otu001142	Fungi	Ascomycota	Ascomycota_unclassified	Ascomycota_unclassified	Ascomycota_unclassified	Ascomycota_unclassified
Otu001143	Fungi	Ascomycota	Sordariomycetes	Sordariales	Helminthosphaeriaceae	Endophragmiella
Otu001145	Fungi	Mortierellomycota	Mortierellomycetes	Mortierellales	Mortierellaceae	Mortierellaceae_unclassified
Otu001146	Fungi	Ascomycota	Dothideomycetes	Botryosphaeriales	Botryosphaeriaceae	Botryosphaeriaceae_unclassified
Otu001147	Fungi	Ascomycota	Eurotiomycetes	Eurotiales	Aspergillaceae	Talaromyces
Otu001148	Fungi	Fungi_unclassified	Fungi_unclassified	Fungi_unclassified	Fungi_unclassified	Fungi_unclassified
Otu001149	Fungi	Ascomycota	Lecanoromycetes	Ostropales	unclassified	unclassified
Otu001150	Fungi	Basidiomycota	Tremellomycetes	Tremellales	Cryptococcaceae	Cryptococcus
Otu001151	Fungi	Ascomycota	Sordariomycetes	Microascales	Microascales_unclassified	Microascales_unclassified
Otu001152	Fungi	Ascomycota	Sordariomycetes	Hypocreales	Nectriaceae	Bisifusarium
Otu001153	Fungi	Fungi_unclassified	Fungi_unclassified	Fungi_unclassified	Fungi_unclassified	Fungi_unclassified
Otu001154	Fungi	Fungi_unclassified	Fungi_unclassified	Fungi_unclassified	Fungi_unclassified	Fungi_unclassified
Otu001155	Fungi	Ascomycota	Dothideomycetes	Pleosporales	Neopyrenochaetaceae	Neopyrenochaeta
Otu001156	Fungi	Fungi_unclassified	Fungi_unclassified	Fungi_unclassified	Fungi_unclassified	Fungi_unclassified
Otu001157	Fungi	Fungi_unclassified	Fungi_unclassified	Fungi_unclassified	Fungi_unclassified	Fungi_unclassified
Otu001158	Fungi	Ascomycota	Sordariomycetes	Sordariales	Helminthosphaeriaceae	Endophragmiella
Otu001159	Fungi	Ascomycota	Sordariomycetes	Microascales	Microascaceae	Scedosporium
Otu001160	Fungi	Ascomycota	Laboulbeniomycetes	Pyxidiophorales	Pyxidiophoraceae	Pyxidiophora
Otu001161	Fungi	Ascomycota	Laboulbeniomycetes	Pyxidiophorales	Pyxidiophoraceae	Pyxidiophora
Otu001162	Fungi	Ascomycota	Sordariomycetes	Hypocreales	Hypocreaceae	Hypomyces
Otu001163	Fungi	Ascomycota	Sordariomycetes	Hypocreales	Hypocreales_unclassified	Hypocreales_unclassified
Otu001164	Fungi	Fungi_unclassified	Fungi_unclassified	Fungi_unclassified	Fungi_unclassified	Fungi_unclassified
Otu001166	Fungi	Chytridiomycota	Spizellomycetes	Spizellomycetales	unclassified	unclassified
Otu001167	Fungi	Rozellomycota	unclassified	unclassified	unclassified	unclassified
Otu001168	Fungi	Fungi_unclassified	Fungi_unclassified	Fungi_unclassified	Fungi_unclassified	Fungi_unclassified
Otu001169	Fungi	Fungi_unclassified	Fungi_unclassified	Fungi_unclassified	Fungi_unclassified	Fungi_unclassified
Otu001170	Fungi	Ascomycota	Dothideomycetes	Pleosporales	Phaeosphaeriaceae	Phaeosphaeriaceae_unclassified
Otu001172	Fungi	Fungi_unclassified	Fungi_unclassified	Fungi_unclassified	Fungi_unclassified	Fungi_unclassified
Otu001174	Fungi	Ascomycota	Dothideomycetes	Pleosporales	Pleosporales_unclassified	Pleosporales_unclassified
Otu001176	Fungi	Ascomycota	Dothideomycetes	Pleosporales	Melanommataceae	Melanommataceae_unclassified
Otu001177	Fungi	Basidiomycota	Agaricomycetes	Phallales	Phallaceae	Phallus
Otu001178	Fungi	Fungi_unclassified	Fungi_unclassified	Fungi_unclassified	Fungi_unclassified	Fungi_unclassified
Otu001179	Fungi	Ascomycota	Dothideomycetes	Pleosporales	Lentitheciaceae	Poaceascoma
Otu001180	Fungi	Chytridiomycota	Chytridiomycota_unclassified	Chytridiomycota_unclassified	Chytridiomycota_unclassified	Chytridiomycota_unclassified
Otu001181	Fungi	Ascomycota	Orbiliomycetes	Orbiliales	Orbiliaceae	Dactylella
Otu001182	Fungi	Ascomycota	Sordariomycetes	Hypocreales	Hypocreales_fam_Incertae_sedis	Sarocladium
Otu001183	Fungi	Fungi_unclassified	Fungi_unclassified	Fungi_unclassified	Fungi_unclassified	Fungi_unclassified
Otu001184	Fungi	Ascomycota	Sordariomycetes	Xylariales	Bartaliniaceae	Bartalinia
Otu001185	Fungi	Ascomycota	Sordariomycetes	Sordariales	Chaetomiaceae	Chaetomiaceae_unclassified
Otu001186	Fungi	Ascomycota	Dothideomycetes	Pleosporales	Phaeosphaeriaceae	Leptospora
Otu001187	Fungi	Fungi_unclassified	Fungi_unclassified	Fungi_unclassified	Fungi_unclassified	Fungi_unclassified
Otu001188	Fungi	Fungi_unclassified	Fungi_unclassified	Fungi_unclassified	Fungi_unclassified	Fungi_unclassified
Otu001189	Fungi	Fungi_unclassified	Fungi_unclassified	Fungi_unclassified	Fungi_unclassified	Fungi_unclassified
Otu001190	Fungi	Ascomycota	Sordariomycetes	Hypocreales	Niessliaceae	Eucasphaeria
Otu001191	Fungi	unclassified	unclassified	unclassified	unclassified	unclassified
Otu001192	Fungi	Ascomycota	Sordariomycetes	Glomerellales	Plectosphaerellaceae	Plectosphaerella
Otu001193	Fungi	Ascomycota	Sordariomycetes	Hypocreales	Nectriaceae	Fusarium
Otu001194	Fungi	Ascomycota	Sordariomycetes	Xylariales	Xylariales_fam_Incertae_sedis	Fusidium
Otu001196	Fungi	Ascomycota	Dothideomycetes	Venturiales	Sympoventuriaceae	Scolecobasidium
Otu001197	Fungi	Basidiomycota	Agaricomycetes	Agaricales	Agaricales_unclassified	Agaricales_unclassified
Otu001200	Fungi	Ascomycota	Sordariomycetes	Glomerellales	Plectosphaerellaceae	Gibellulopsis
Otu001202	Fungi	Ascomycota	Sordariomycetes	Microascales	Halosphaeriaceae	Halosphaeriaceae_unclassified
Otu001204	Fungi	Ascomycota	Sordariomycetes	Glomerellales	Plectosphaerellaceae	Plectosphaerellaceae_unclassified
Otu001205	Fungi	Fungi_unclassified	Fungi_unclassified	Fungi_unclassified	Fungi_unclassified	Fungi_unclassified
Otu001206	Fungi	Ascomycota	Sordariomycetes	Glomerellales	Plectosphaerellaceae	Furcasterigmium
Otu001207	Fungi	Fungi_unclassified	Fungi_unclassified	Fungi_unclassified	Fungi_unclassified	Fungi_unclassified
Otu001208	Fungi	Fungi_unclassified	Fungi_unclassified	Fungi_unclassified	Fungi_unclassified	Fungi_unclassified
Otu001209	Fungi	Fungi_unclassified	Fungi_unclassified	Fungi_unclassified	Fungi_unclassified	Fungi_unclassified
Otu001210	Fungi	Mortierellomycota	Mortierellomycetes	Mortierellales	Mortierellaceae	Mortierellaceae_unclassified
Otu001211	Fungi	Fungi_unclassified	Fungi_unclassified	Fungi_unclassified	Fungi_unclassified	Fungi_unclassified
Otu001213	Fungi	Ascomycota	Dothideomycetes	Pleosporales	Pleosporaceae	Curvularia
Otu001214	Fungi	Fungi_unclassified	Fungi_unclassified	Fungi_unclassified	Fungi_unclassified	Fungi_unclassified
Otu001215	Fungi	Ascomycota	Ascomycota_unclassified	Ascomycota_unclassified	Ascomycota_unclassified	Ascomycota_unclassified
Otu001216	Fungi	Chytridiomycota	Rhizophydiomycetes	Rhizophydiales	Rhizophydiaceae	Rhizophydium
Otu001217	Fungi	Ascomycota	Sordariomycetes	Sordariales	Sordariales_unclassified	Sordariales_unclassified
Otu001218	Fungi	Ascomycota	Eurotiomycetes	Chaetothyriales	Herpotrichiellaceae	Exophiala
Otu001219	Fungi	unclassified	unclassified	unclassified	unclassified	unclassified
Otu001220	Fungi	Fungi_unclassified	Fungi_unclassified	Fungi_unclassified	Fungi_unclassified	Fungi_unclassified
Otu001222	Fungi	Fungi_unclassified	Fungi_unclassified	Fungi_unclassified	Fungi_unclassified	Fungi_unclassified
Otu001224	Fungi	Ascomycota	Sordariomycetes	Coniochaetales	Coniochaetales_unclassified	Coniochaetales_unclassified
Otu001225	Fungi	Fungi_unclassified	Fungi_unclassified	Fungi_unclassified	Fungi_unclassified	Fungi_unclassified
Otu001226	Fungi	Chytridiomycota	Rhizophydiomycetes	Rhizophydiales	unclassified	unclassified
Otu001227	Fungi	Ascomycota	Sordariomycetes	Sordariales	Chaetomiaceae	Chaetomium
Otu001228	Fungi	Fungi_unclassified	Fungi_unclassified	Fungi_unclassified	Fungi_unclassified	Fungi_unclassified
Otu001229	Fungi	Basidiomycota	Agaricomycetes	Trechisporales	Hydnodontaceae	Hydnodontaceae_unclassified
Otu001231	Fungi	Fungi_unclassified	Fungi_unclassified	Fungi_unclassified	Fungi_unclassified	Fungi_unclassified
Otu001233	Fungi	Basidiomycota	Agaricomycetes	Cantharellales	Hydnaceae	Sistotrema
Otu001235	Fungi	Ascomycota	Dothideomycetes	Pleosporales	Pleosporaceae	Stemphylium
Otu001236	Fungi	Fungi_unclassified	Fungi_unclassified	Fungi_unclassified	Fungi_unclassified	Fungi_unclassified
Otu001237	Fungi	Fungi_unclassified	Fungi_unclassified	Fungi_unclassified	Fungi_unclassified	Fungi_unclassified
Otu001239	Fungi	Fungi_unclassified	Fungi_unclassified	Fungi_unclassified	Fungi_unclassified	Fungi_unclassified
Otu001240	Fungi	Ascomycota	Sordariomycetes	Hypocreales	Nectriaceae	Acremoniopsis
Otu001242	Fungi	Fungi_unclassified	Fungi_unclassified	Fungi_unclassified	Fungi_unclassified	Fungi_unclassified
Otu001243	Fungi	Ascomycota	Sordariomycetes	Sordariales	Chaetomiaceae	Chaetomiaceae_unclassified
Otu001244	Fungi	Ascomycota	Sordariomycetes	Hypocreales	Stachybotryaceae	Xepicula
Otu001245	Fungi	Fungi_unclassified	Fungi_unclassified	Fungi_unclassified	Fungi_unclassified	Fungi_unclassified
Otu001246	Fungi	Fungi_unclassified	Fungi_unclassified	Fungi_unclassified	Fungi_unclassified	Fungi_unclassified
Otu001248	Fungi	Ascomycota	Sordariomycetes	Sordariales	Lasiosphaeriaceae	Schizothecium
Otu001249	Fungi	Fungi_unclassified	Fungi_unclassified	Fungi_unclassified	Fungi_unclassified	Fungi_unclassified
Otu001250	Fungi	Fungi_unclassified	Fungi_unclassified	Fungi_unclassified	Fungi_unclassified	Fungi_unclassified
Otu001252	Fungi	Zoopagomycota	Zoopagomycetes	Zoopagales	unclassified	unclassified
Otu001253	Fungi	Fungi_unclassified	Fungi_unclassified	Fungi_unclassified	Fungi_unclassified	Fungi_unclassified
Otu001256	Fungi	Fungi_unclassified	Fungi_unclassified	Fungi_unclassified	Fungi_unclassified	Fungi_unclassified
Otu001257	Fungi	Ascomycota	Sordariomycetes	Hypocreales	Cordycipitaceae	Beauveria
Otu001258	Fungi	Ascomycota	Dothideomycetes	Capnodiales	Cladosporiaceae	Melomastia
Otu001259	Fungi	Ascomycota	Sordariomycetes	Sordariales	Lasiosphaeriaceae	Schizothecium
Otu001260	Fungi	Ascomycota	Sordariomycetes	Hypocreales	Hypocreales_unclassified	Hypocreales_unclassified
Otu001261	Fungi	Fungi_unclassified	Fungi_unclassified	Fungi_unclassified	Fungi_unclassified	Fungi_unclassified
Otu001263	Fungi	Basidiomycota	Agaricomycetes	Agaricales	Agaricales_unclassified	Agaricales_unclassified
Otu001264	Fungi	Ascomycota	Sordariomycetes	Phomatosporales	Phomatosporaceae	Phomatospora
Otu001265	Fungi	Fungi_unclassified	Fungi_unclassified	Fungi_unclassified	Fungi_unclassified	Fungi_unclassified
Otu001266	Fungi	Fungi_unclassified	Fungi_unclassified	Fungi_unclassified	Fungi_unclassified	Fungi_unclassified
Otu001267	Fungi	Ascomycota	Sordariomycetes	Sordariales	Chaetomiaceae	Humicola
Otu001268	Fungi	Fungi_unclassified	Fungi_unclassified	Fungi_unclassified	Fungi_unclassified	Fungi_unclassified
Otu001270	Fungi	Ascomycota	Dothideomycetes	Pleosporales	Phaeosphaeriaceae	Setophaeosphaeria
Otu001271	Fungi	Fungi_unclassified	Fungi_unclassified	Fungi_unclassified	Fungi_unclassified	Fungi_unclassified
Otu001272	Fungi	Rozellomycota	Rozellomycotina_cls_Incertae_sedis	GS11	unclassified	unclassified
Otu001275	Fungi	Ascomycota	Eurotiomycetes	Eurotiales	Aspergillaceae	Talaromyces
Otu001276	Fungi	Basidiomycota	Tremellomycetes	Filobasidiales	Piskurozymaceae	Solicoccozyma
Otu001277	Fungi	Ascomycota	Ascomycota_unclassified	Ascomycota_unclassified	Ascomycota_unclassified	Ascomycota_unclassified
Otu001279	Fungi	Fungi_unclassified	Fungi_unclassified	Fungi_unclassified	Fungi_unclassified	Fungi_unclassified
Otu001280	Fungi	Fungi_unclassified	Fungi_unclassified	Fungi_unclassified	Fungi_unclassified	Fungi_unclassified
Otu001282	Fungi	Ascomycota	Dothideomycetes	Pleosporales	Torulaceae	Torula
Otu001283	Fungi	Ascomycota	Sordariomycetes	Hypocreales	Hypocreales_fam_Incertae_sedis	Acremonium
Otu001284	Fungi	Ascomycota	Dothideomycetes	Pleosporales	Neomassarinaceae	unclassified
Otu001285	Fungi	unclassified	unclassified	unclassified	unclassified	unclassified
Otu001286	Fungi	Fungi_unclassified	Fungi_unclassified	Fungi_unclassified	Fungi_unclassified	Fungi_unclassified
Otu001287	Fungi	Glomeromycota	Glomeromycetes	Glomerales	Glomeraceae	Glomeraceae_unclassified
Otu001288	Fungi	Ascomycota	Eurotiomycetes	Eurotiales	Aspergillaceae	Aspergillus
Otu001289	Fungi	Ascomycota	Sordariomycetes	Sordariomycetes_unclassified	Sordariomycetes_unclassified	Sordariomycetes_unclassified
Otu001290	Fungi	unclassified	unclassified	unclassified	unclassified	unclassified
Otu001292	Fungi	Rozellomycota	unclassified	unclassified	unclassified	unclassified
Otu001293	Fungi	Aphelidiomycota	Aphelidiomycetes	Aphelidiomycetes_unclassified	Aphelidiomycetes_unclassified	Aphelidiomycetes_unclassified
Otu001294	Fungi	Basidiomycota	Tremellomycetes	Tremellales	Bulleribasidiaceae	Vishniacozyma
Otu001296	Fungi	Basidiomycota	Agaricomycetes	Trechisporales	Hydnodontaceae	Trechispora
Otu001297	Fungi	Ascomycota	Sordariomycetes	Magnaporthales	Magnaporthaceae	Arxiella
Otu001298	Fungi	Ascomycota	Ascomycota_unclassified	Ascomycota_unclassified	Ascomycota_unclassified	Ascomycota_unclassified
Otu001299	Fungi	Ascomycota	Dothideomycetes	Mycosphaerellales	Mycosphaerellaceae	Acrodontium
Otu001300	Fungi	Ascomycota	Sordariomycetes	Hypocreales	Hypocreaceae	Kiflimonium
Otu001302	Fungi	Fungi_unclassified	Fungi_unclassified	Fungi_unclassified	Fungi_unclassified	Fungi_unclassified
Otu001303	Fungi	Ascomycota	Sordariomycetes	Hypocreales	Nectriaceae	Penicillifer
Otu001304	Fungi	Fungi_unclassified	Fungi_unclassified	Fungi_unclassified	Fungi_unclassified	Fungi_unclassified
Otu001305	Fungi	Ascomycota	Sordariomycetes	Hypocreales	Bionectriaceae	Clonostachys
Otu001306	Fungi	Ascomycota	Sordariomycetes	Xylariales	Microdochiaceae	Idriella
Otu001307	Fungi	Ascomycota	Leotiomycetes	Helotiales	Helotiaceae	Scytalidium
Otu001310	Fungi	Fungi_unclassified	Fungi_unclassified	Fungi_unclassified	Fungi_unclassified	Fungi_unclassified
Otu001311	Fungi	Ascomycota	Sordariomycetes	Chaetosphaeriales	Chaetosphaeriaceae	Chaetosphaeriaceae_unclassified
Otu001312	Fungi	Ascomycota	Sordariomycetes	Hypocreales	Hypocreales_fam_Incertae_sedis	Sarocladium
Otu001313	Fungi	Ascomycota	Sordariomycetes	Hypocreales	Nectriaceae	Fusarium
Otu001314	Fungi	Fungi_unclassified	Fungi_unclassified	Fungi_unclassified	Fungi_unclassified	Fungi_unclassified
Otu001315	Fungi	Ascomycota	Ascomycota_unclassified	Ascomycota_unclassified	Ascomycota_unclassified	Ascomycota_unclassified
Otu001316	Fungi	Fungi_unclassified	Fungi_unclassified	Fungi_unclassified	Fungi_unclassified	Fungi_unclassified
Otu001317	Fungi	Fungi_unclassified	Fungi_unclassified	Fungi_unclassified	Fungi_unclassified	Fungi_unclassified
Otu001318	Fungi	Fungi_unclassified	Fungi_unclassified	Fungi_unclassified	Fungi_unclassified	Fungi_unclassified
Otu001319	Fungi	Ascomycota	Sordariomycetes	Hypocreales	Hypocreaceae	Trichoderma
Otu001321	Fungi	Ascomycota	Pezizomycotina_cls_Incertae_sedis	Pezizomycotina_ord_Incertae_sedis	Pezizomycotina_fam_Incertae_sedis	Badarisama
Otu001322	Fungi	Fungi_unclassified	Fungi_unclassified	Fungi_unclassified	Fungi_unclassified	Fungi_unclassified
Otu001323	Fungi	Fungi_unclassified	Fungi_unclassified	Fungi_unclassified	Fungi_unclassified	Fungi_unclassified
Otu001324	Fungi	Fungi_unclassified	Fungi_unclassified	Fungi_unclassified	Fungi_unclassified	Fungi_unclassified
Otu001325	Fungi	Ascomycota	Sordariomycetes	Myrmecridiales	Myrmecridiaceae	Myrmecridium
Otu001326	Fungi	Ascomycota	Sordariomycetes	Hypocreales	Stachybotryaceae	Striaticonidium
Otu001327	Fungi	Chytridiomycota	unclassified	unclassified	unclassified	unclassified
Otu001328	Fungi	Ascomycota	Dothideomycetes	Pleosporales	Lentitheciaceae	unclassified
Otu001329	Fungi	Ascomycota	Eurotiomycetes	Eurotiales	Aspergillaceae	Penicillium
Otu001330	Fungi	Basidiomycota	Agaricomycetes	Agaricales	Marasmiaceae	Marasmius
Otu001332	Fungi	Mortierellomycota	Mortierellomycetes	Mortierellales	Mortierellaceae	Mortierellaceae_unclassified
Otu001333	Fungi	Ascomycota	Orbiliomycetes	Orbiliales	Orbiliales_unclassified	Orbiliales_unclassified
Otu001334	Fungi	unclassified	unclassified	unclassified	unclassified	unclassified
Otu001335	Fungi	Basidiomycota	Basidiomycota_unclassified	Basidiomycota_unclassified	Basidiomycota_unclassified	Basidiomycota_unclassified
Otu001337	Fungi	Ascomycota	Ascomycota_unclassified	Ascomycota_unclassified	Ascomycota_unclassified	Ascomycota_unclassified
Otu001338	Fungi	Ascomycota	Sordariomycetes	Xylariales	Hyponectriaceae	Monographella
Otu001341	Fungi	Ascomycota	Sordariomycetes	Glomerellales	Glomerellaceae	Colletotrichum
Otu001342	Fungi	Ascomycota	Ascomycota_unclassified	Ascomycota_unclassified	Ascomycota_unclassified	Ascomycota_unclassified
Otu001343	Fungi	Ascomycota	Ascomycota_unclassified	Ascomycota_unclassified	Ascomycota_unclassified	Ascomycota_unclassified
Otu001344	Fungi	Basidiomycota	Tremellomycetes	Tremellales	Bulleribasidiaceae	Dioszegia
Otu001345	Fungi	Ascomycota	Eurotiomycetes	Chaetothyriales	Herpotrichiellaceae	Exophiala
Otu001347	Fungi	Ascomycota	Sordariomycetes	Hypocreales	Sarocladiaceae	Parasarocladium
Otu001348	Fungi	unclassified	unclassified	unclassified	unclassified	unclassified
Otu001349	Fungi	Fungi_unclassified	Fungi_unclassified	Fungi_unclassified	Fungi_unclassified	Fungi_unclassified
Otu001350	Fungi	Ascomycota	Sordariomycetes	Sordariales	Lasiosphaeriaceae	Schizothecium
Otu001352	Fungi	Basidiomycota	Agaricomycetes	Agaricales	Psathyrellaceae	Psathyrella
Otu001355	Fungi	Chytridiomycota	Spizellomycetes	Spizellomycetales	Spizellomycetaceae	Spizellomyces
Otu001356	Fungi	Basidiomycota	Cystobasidiomycetes	Sakaguchiales	Sakaguchiaceae	Sakaguchia
Otu001357	Fungi	Basidiomycota	Agaricomycetes	Russulales	Peniophoraceae	unclassified
Otu001359	Fungi	Ascomycota	Sordariomycetes	Sordariales	Chaetomiaceae	Chaetomiaceae_unclassified
Otu001360	Fungi	Ascomycota	Eurotiomycetes	Eurotiales	Aspergillaceae	Penicillium
Otu001361	Fungi	Ascomycota	Orbiliomycetes	Orbiliales	Orbiliales_unclassified	Orbiliales_unclassified
Otu001362	Fungi	Ascomycota	Sordariomycetes	Hypocreales	Nectriaceae	Fusarium
Otu001363	Fungi	Chytridiomycota	Rhizophlyctidomycetes	Rhizophlyctidales	Rhizophlyctidaceae	Rhizophlyctis
Otu001364	Fungi	Ascomycota	Orbiliomycetes	Orbiliales	Orbiliaceae	Orbiliaceae_unclassified
Otu001365	Fungi	Fungi_unclassified	Fungi_unclassified	Fungi_unclassified	Fungi_unclassified	Fungi_unclassified
Otu001366	Fungi	Fungi_unclassified	Fungi_unclassified	Fungi_unclassified	Fungi_unclassified	Fungi_unclassified
Otu001368	Fungi	Rozellomycota	unclassified	unclassified	unclassified	unclassified
Otu001369	Fungi	Ascomycota	Dothideomycetes	Pleosporales	Pleosporaceae	Edenia
Otu001370	Fungi	Ascomycota	Sordariomycetes	Atractosporales	Conlariaceae	Conlarium
Otu001371	Fungi	Fungi_unclassified	Fungi_unclassified	Fungi_unclassified	Fungi_unclassified	Fungi_unclassified
Otu001372	Fungi	Ascomycota	Ascomycota_unclassified	Ascomycota_unclassified	Ascomycota_unclassified	Ascomycota_unclassified
Otu001373	Fungi	Ascomycota	Dothideomycetes	Venturiales	Sympoventuriaceae	Scolecobasidium
Otu001375	Fungi	Ascomycota	Dothideomycetes	Pleosporales	Phaeosphaeriaceae	Phaeosphaeriaceae_unclassified
Otu001376	Fungi	Fungi_unclassified	Fungi_unclassified	Fungi_unclassified	Fungi_unclassified	Fungi_unclassified
Otu001377	Fungi	Mucoromycota	Mucoromycetes	Mucorales	Choanephoraceae	Poitrasia
Otu001378	Fungi	Ascomycota	Sordariomycetes	Hypocreales	Hypocreales_fam_Incertae_sedis	Fusariella
Otu001379	Fungi	Ascomycota	Dothideomycetes	Tubeufiales	Tubeufiaceae	unclassified
Otu001380	Fungi	Ascomycota	Ascomycota_unclassified	Ascomycota_unclassified	Ascomycota_unclassified	Ascomycota_unclassified
Otu001381	Fungi	Ascomycota	Sordariomycetes	Phomatosporales	Phomatosporaceae	Phomatospora
Otu001382	Fungi	Ascomycota	Ascomycota_unclassified	Ascomycota_unclassified	Ascomycota_unclassified	Ascomycota_unclassified
Otu001383	Fungi	Ascomycota	Pezizomycotina_cls_Incertae_sedis	Pezizomycotina_ord_Incertae_sedis	Pezizomycotina_fam_Incertae_sedis	Triscelophorus
Otu001384	Fungi	Chytridiomycota	Spizellomycetes	Spizellomycetales	unclassified	unclassified
Otu001385	Fungi	Fungi_unclassified	Fungi_unclassified	Fungi_unclassified	Fungi_unclassified	Fungi_unclassified
Otu001386	Fungi	Ascomycota	Ascomycota_unclassified	Ascomycota_unclassified	Ascomycota_unclassified	Ascomycota_unclassified
Otu001387	Fungi	Chytridiomycota	Spizellomycetes	Spizellomycetales	Powellomycetaceae	unclassified
Otu001388	Fungi	Ascomycota	Eurotiomycetes	Eurotiales	Aspergillaceae	Penicillium
Otu001389	Fungi	Chytridiomycota	Spizellomycetes	Spizellomycetales	unclassified	unclassified
Otu001391	Fungi	Ascomycota	Sordariomycetes	Sordariales	Chaetomiaceae	Chaetomiaceae_unclassified
Otu001392	Fungi	Basidiomycota	Agaricomycetes	Agaricales	Lycoperdaceae	Vascellum
Otu001393	Fungi	Fungi_unclassified	Fungi_unclassified	Fungi_unclassified	Fungi_unclassified	Fungi_unclassified
Otu001394	Fungi	Fungi_unclassified	Fungi_unclassified	Fungi_unclassified	Fungi_unclassified	Fungi_unclassified
Otu001395	Fungi	Basidiomycota	Agaricomycetes	Agaricomycetes_unclassified	Agaricomycetes_unclassified	Agaricomycetes_unclassified
Otu001396	Fungi	Ascomycota	Sordariomycetes	Hypocreales	Nectriaceae	Fusarium
Otu001398	Fungi	Ascomycota	Orbiliomycetes	Orbiliales	Orbiliales_unclassified	Orbiliales_unclassified
Otu001399	Fungi	Basidiomycota	Agaricostilbomycetes	Agaricostilbales	unclassified	unclassified
Otu001400	Fungi	Fungi_unclassified	Fungi_unclassified	Fungi_unclassified	Fungi_unclassified	Fungi_unclassified
Otu001401	Fungi	Ascomycota	Sordariomycetes	Pisorisporiales	Pisorisporiales_fam._incertae_sedis	Brocchiosphaera
Otu001402	Fungi	Fungi_unclassified	Fungi_unclassified	Fungi_unclassified	Fungi_unclassified	Fungi_unclassified
Otu001403	Fungi	Ascomycota	Dothideomycetes	Pleosporales	Pleosporales_unclassified	Pleosporales_unclassified
Otu001404	Fungi	Ascomycota	Sordariomycetes	Hypocreales	Hypocreales_unclassified	Hypocreales_unclassified
Otu001406	Fungi	Fungi_unclassified	Fungi_unclassified	Fungi_unclassified	Fungi_unclassified	Fungi_unclassified
Otu001407	Fungi	Ascomycota	Leotiomycetes	Thelebolales	Thelebolaceae	Inopinatum
Otu001409	Fungi	Fungi_unclassified	Fungi_unclassified	Fungi_unclassified	Fungi_unclassified	Fungi_unclassified
Otu001410	Fungi	Ascomycota	Ascomycota_unclassified	Ascomycota_unclassified	Ascomycota_unclassified	Ascomycota_unclassified
Otu001411	Fungi	Ascomycota	Sordariomycetes	Atractosporales	Conlariaceae	Conlarium
Otu001412	Fungi	Ascomycota	Eurotiomycetes	Chaetothyriales	Herpotrichiellaceae	Exophiala
Otu001413	Fungi	Ascomycota	Sordariomycetes	Hypocreales	Hypocreaceae	Trichoderma
Otu001415	Fungi	Fungi_unclassified	Fungi_unclassified	Fungi_unclassified	Fungi_unclassified	Fungi_unclassified
Otu001416	Fungi	Ascomycota	Dothideomycetes	Pleosporales	Didymellaceae	Didymellaceae_unclassified
Otu001421	Fungi	Ascomycota	Sordariomycetes	Parasympodiellales	Parasympodiellaceae	unclassified
Otu001422	Fungi	Ascomycota	Sordariomycetes	Glomerellales	Plectosphaerellaceae	Plectosphaerella
Otu001424	Fungi	Fungi_unclassified	Fungi_unclassified	Fungi_unclassified	Fungi_unclassified	Fungi_unclassified
Otu001427	Fungi	Fungi_unclassified	Fungi_unclassified	Fungi_unclassified	Fungi_unclassified	Fungi_unclassified
Otu001428	Fungi	Ascomycota	Sordariomycetes	Sordariales	Sordariales_unclassified	Sordariales_unclassified
Otu001429	Fungi	Fungi_unclassified	Fungi_unclassified	Fungi_unclassified	Fungi_unclassified	Fungi_unclassified
Otu001430	Fungi	Ascomycota	Eurotiomycetes	Onygenales	Onygenales_unclassified	Onygenales_unclassified
Otu001432	Fungi	Ascomycota	Sordariomycetes	Sordariomycetes_unclassified	Sordariomycetes_unclassified	Sordariomycetes_unclassified
Otu001433	Fungi	Ascomycota	Sordariomycetes	Glomerellales	Plectosphaerellaceae	Stachylidium
Otu001435	Fungi	Fungi_unclassified	Fungi_unclassified	Fungi_unclassified	Fungi_unclassified	Fungi_unclassified
Otu001436	Fungi	Ascomycota	Sordariomycetes	Hypocreales	Hypocreaceae	Sphaerostilbella
Otu001437	Fungi	Ascomycota	Dothideomycetes	Pleosporales	Pleosporales_unclassified	Pleosporales_unclassified
Otu001438	Fungi	Ascomycota	Eurotiomycetes	Chaetothyriales	Herpotrichiellaceae	Exophiala
Otu001439	Fungi	Chytridiomycota	Spizellomycetes	Spizellomycetales	Powellomycetaceae	Fimicolochytrium
Otu001440	Fungi	Fungi_unclassified	Fungi_unclassified	Fungi_unclassified	Fungi_unclassified	Fungi_unclassified
Otu001441	Fungi	Ascomycota	Dothideomycetes	Pleosporales	Didymellaceae	Didymellaceae_unclassified
Otu001442	Fungi	Basidiomycota	Agaricomycetes	Agaricales	Psathyrellaceae	Coprinopsis
Otu001443	Fungi	Mortierellomycota	Mortierellomycetes	Mortierellales	Mortierellaceae	Mortierella
Otu001444	Fungi	Ascomycota	Dothideomycetes	Pleosporales	Pleosporales_unclassified	Pleosporales_unclassified
Otu001445	Fungi	Ascomycota	Orbiliomycetes	Orbiliales	Orbiliales_unclassified	Orbiliales_unclassified
Otu001446	Fungi	Ascomycota	Sordariomycetes	Atractosporales	Conlariaceae	Conlarium
Otu001447	Fungi	Ascomycota	Dothideomycetes	Pleosporales	Didymellaceae	Neoascochyta
Otu001448	Fungi	Ascomycota	Sordariomycetes	Coniochaetales	Coniochaetaceae	Coniochaetaceae_unclassified
Otu001449	Fungi	Ascomycota	Sordariomycetes	Hypocreales	Hypocreaceae	Trichoderma
Otu001450	Fungi	Fungi_unclassified	Fungi_unclassified	Fungi_unclassified	Fungi_unclassified	Fungi_unclassified
Otu001452	Fungi	Fungi_unclassified	Fungi_unclassified	Fungi_unclassified	Fungi_unclassified	Fungi_unclassified
Otu001454	Fungi	Fungi_unclassified	Fungi_unclassified	Fungi_unclassified	Fungi_unclassified	Fungi_unclassified
Otu001455	Fungi	Ascomycota	Sordariomycetes	Coniochaetales	Coniochaetaceae	Coniochaetaceae_unclassified
Otu001456	Fungi	Fungi_unclassified	Fungi_unclassified	Fungi_unclassified	Fungi_unclassified	Fungi_unclassified
Otu001457	Fungi	Fungi_unclassified	Fungi_unclassified	Fungi_unclassified	Fungi_unclassified	Fungi_unclassified
Otu001458	Fungi	Fungi_unclassified	Fungi_unclassified	Fungi_unclassified	Fungi_unclassified	Fungi_unclassified
Otu001460	Fungi	Ascomycota	Sordariomycetes	Chaetosphaeriales	Chaetosphaeriaceae	Chaetosphaeriaceae_unclassified
Otu001461	Fungi	Fungi_unclassified	Fungi_unclassified	Fungi_unclassified	Fungi_unclassified	Fungi_unclassified
Otu001463	Fungi	Fungi_unclassified	Fungi_unclassified	Fungi_unclassified	Fungi_unclassified	Fungi_unclassified
Otu001464	Fungi	Ascomycota	Dothideomycetes	Pleosporales	Pleosporales_unclassified	Pleosporales_unclassified
Otu001466	Fungi	Ascomycota	Sordariomycetes	Hypocreales	Hypocreales_fam_Incertae_sedis	Pseudomicrodochium
Otu001467	Fungi	Fungi_unclassified	Fungi_unclassified	Fungi_unclassified	Fungi_unclassified	Fungi_unclassified
Otu001468	Fungi	Ascomycota	Dothideomycetes	Capnodiales	unclassified	unclassified
Otu001470	Fungi	Ascomycota	Sordariomycetes	Coniochaetales	Coniochaetaceae	Coniochaetaceae_unclassified
Otu001471	Fungi	Ascomycota	Ascomycota_unclassified	Ascomycota_unclassified	Ascomycota_unclassified	Ascomycota_unclassified
Otu001472	Fungi	Ascomycota	Sordariomycetes	Hypocreales	Clavicipitaceae	Parametarhizium
Otu001473	Fungi	Ascomycota	Sordariomycetes	Sordariales	Lasiosphaeriaceae	Arnium
Otu001474	Fungi	Fungi_unclassified	Fungi_unclassified	Fungi_unclassified	Fungi_unclassified	Fungi_unclassified
Otu001475	Fungi	Fungi_unclassified	Fungi_unclassified	Fungi_unclassified	Fungi_unclassified	Fungi_unclassified
Otu001476	Fungi	Ascomycota	Sordariomycetes	Glomerellales	Plectosphaerellaceae	Plectosphaerellaceae_unclassified
Otu001478	Fungi	Ascomycota	Sordariomycetes	Hypocreales	Nectriaceae	Fusarium
Otu001479	Fungi	Ascomycota	Sordariomycetes	Sordariales	Chaetomiaceae	Chaetomiaceae_unclassified
Otu001480	Fungi	Basidiomycota	Agaricomycetes	Agaricomycetes_unclassified	Agaricomycetes_unclassified	Agaricomycetes_unclassified
Otu001482	Fungi	Fungi_unclassified	Fungi_unclassified	Fungi_unclassified	Fungi_unclassified	Fungi_unclassified
Otu001483	Fungi	Fungi_unclassified	Fungi_unclassified	Fungi_unclassified	Fungi_unclassified	Fungi_unclassified
Otu001484	Fungi	unclassified	unclassified	unclassified	unclassified	unclassified
Otu001486	Fungi	Chytridiomycota	Spizellomycetes	Spizellomycetales	Spizellomycetaceae	Spizellomyces
Otu001487	Fungi	unclassified	unclassified	unclassified	unclassified	unclassified
Otu001488	Fungi	Chytridiomycota	unclassified	unclassified	unclassified	unclassified
Otu001489	Fungi	Chytridiomycota	Chytridiomycota_unclassified	Chytridiomycota_unclassified	Chytridiomycota_unclassified	Chytridiomycota_unclassified
Otu001491	Fungi	Ascomycota	Dothideomycetes	Venturiales	Sympoventuriaceae	Sympoventuriaceae_unclassified
Otu001492	Fungi	Ascomycota	Dothideomycetes	Pleosporales	Lophiotremataceae	Lophiotrema
Otu001493	Fungi	Fungi_unclassified	Fungi_unclassified	Fungi_unclassified	Fungi_unclassified	Fungi_unclassified
Otu001494	Fungi	Ascomycota	Pezizomycetes	Pezizales	Pyronemataceae	Cheilymenia
Otu001495	Fungi	Fungi_unclassified	Fungi_unclassified	Fungi_unclassified	Fungi_unclassified	Fungi_unclassified
Otu001496	Fungi	Fungi_unclassified	Fungi_unclassified	Fungi_unclassified	Fungi_unclassified	Fungi_unclassified
Otu001497	Fungi	Ascomycota	Sordariomycetes	Sordariales	Podosporaceae	Podospora
Otu001498	Fungi	Fungi_unclassified	Fungi_unclassified	Fungi_unclassified	Fungi_unclassified	Fungi_unclassified
Otu001500	Fungi	Ascomycota	Sordariomycetes	Hypocreales	Bionectriaceae	Hydropisphaera
Otu001502	Fungi	Ascomycota	Sordariomycetes	Sordariomycetes_unclassified	Sordariomycetes_unclassified	Sordariomycetes_unclassified
Otu001503	Fungi	Ascomycota	Eurotiomycetes	Eurotiales	Aspergillaceae	Talaromyces
Otu001504	Fungi	Ascomycota	Sordariomycetes	Hypocreales	Hypocreales_fam_Incertae_sedis	Acremonium
Otu001506	Fungi	Fungi_unclassified	Fungi_unclassified	Fungi_unclassified	Fungi_unclassified	Fungi_unclassified
Otu001507	Fungi	Ascomycota	Eurotiomycetes	Eurotiales	Aspergillaceae	Penicillium
Otu001509	Fungi	Mortierellomycota	Mortierellomycetes	Mortierellales	Mortierellaceae	Mortierella
Otu001511	Fungi	Rozellomycota	Rozellomycotina_cls_Incertae_sedis	GS11	unclassified	unclassified
Otu001512	Fungi	Fungi_unclassified	Fungi_unclassified	Fungi_unclassified	Fungi_unclassified	Fungi_unclassified
Otu001515	Fungi	Ascomycota	Dothideomycetes	Pleosporales	Pleosporales_unclassified	Pleosporales_unclassified
Otu001518	Fungi	Ascomycota	Dothideomycetes	Pleosporales	Sporormiaceae	Sporormiaceae_unclassified
Otu001519	Fungi	unclassified	unclassified	unclassified	unclassified	unclassified
Otu001520	Fungi	Ascomycota	Sordariomycetes	Glomerellales	Plectosphaerellaceae	Plectosphaerella
Otu001521	Fungi	Ascomycota	Sordariomycetes	Hypocreales	Hypocreaceae	Trichoderma
Otu001523	Fungi	Ascomycota	Dothideomycetes	Pleosporales	Torulaceae	Torula
Otu001525	Fungi	Fungi_unclassified	Fungi_unclassified	Fungi_unclassified	Fungi_unclassified	Fungi_unclassified
Otu001526	Fungi	Ascomycota	Sordariomycetes	Hypocreales	Hypocreaceae	Trichoderma
Otu001527	Fungi	Ascomycota	Eurotiomycetes	Onygenales	Ajellomycetaceae	Emmonsiellopsis
Otu001529	Fungi	Fungi_unclassified	Fungi_unclassified	Fungi_unclassified	Fungi_unclassified	Fungi_unclassified
Otu001530	Fungi	Fungi_unclassified	Fungi_unclassified	Fungi_unclassified	Fungi_unclassified	Fungi_unclassified
Otu001531	Fungi	Ascomycota	Sordariomycetes	Hypocreales	Tilachlidiaceae	Tilachlidium
Otu001532	Fungi	Fungi_unclassified	Fungi_unclassified	Fungi_unclassified	Fungi_unclassified	Fungi_unclassified
Otu001533	Fungi	Mortierellomycota	Mortierellomycetes	Mortierellales	Mortierellaceae	Mortierellaceae_unclassified
Otu001534	Fungi	Ascomycota	Ascomycota_unclassified	Ascomycota_unclassified	Ascomycota_unclassified	Ascomycota_unclassified
Otu001537	Fungi	Fungi_unclassified	Fungi_unclassified	Fungi_unclassified	Fungi_unclassified	Fungi_unclassified
Otu001538	Fungi	Chytridiomycota	Rhizophydiomycetes	Rhizophydiales	Rhizophydiaceae	Rhizophydium
Otu001539	Fungi	Chytridiomycota	Rhizophlyctidomycetes	Rhizophlyctidales	Rhizophlyctidaceae	Rhizophlyctis
Otu001541	Fungi	Fungi_unclassified	Fungi_unclassified	Fungi_unclassified	Fungi_unclassified	Fungi_unclassified
Otu001543	Fungi	Ascomycota	Sordariomycetes	Sordariales	Sordariales_unclassified	Sordariales_unclassified
Otu001544	Fungi	Fungi_unclassified	Fungi_unclassified	Fungi_unclassified	Fungi_unclassified	Fungi_unclassified
Otu001546	Fungi	Basidiomycota	Agaricomycetes	Agaricales	Bolbitiaceae	Panaeolus
Otu001547	Fungi	Ascomycota	Eurotiomycetes	Onygenales	Gymnoascaceae	Leucothecium
Otu001548	Fungi	Ascomycota	Sordariomycetes	Hypocreales	Nectriaceae	Fusarium
Otu001549	Fungi	Basidiomycota	Microbotryomycetes	Microbotryomycetes_ord_Incertae_sedis	Microbotryomycetes_fam_Incertae_sedis	Curvibasidium
Otu001550	Fungi	Mucoromycota	Mucoromycetes	Mucorales	Mucoraceae	Mucor
Otu001551	Fungi	Ascomycota	Sordariomycetes	Hypocreales	Hypocreaceae	Hypocreaceae_unclassified
Otu001552	Fungi	Fungi_unclassified	Fungi_unclassified	Fungi_unclassified	Fungi_unclassified	Fungi_unclassified
Otu001554	Fungi	Ascomycota	Eurotiomycetes	Eurotiales	Aspergillaceae	Aspergillus
Otu001555	Fungi	Ascomycota	Eurotiomycetes	Eurotiales	Aspergillaceae	Penicillium
Otu001556	Fungi	Ascomycota	Dothideomycetes	Pleosporales	Pleosporaceae	Curvularia
Otu001557	Fungi	Chytridiomycota	Spizellomycetes	Spizellomycetales	unclassified	unclassified
Otu001558	Fungi	Fungi_unclassified	Fungi_unclassified	Fungi_unclassified	Fungi_unclassified	Fungi_unclassified
Otu001560	Fungi	Fungi_unclassified	Fungi_unclassified	Fungi_unclassified	Fungi_unclassified	Fungi_unclassified
Otu001562	Fungi	Ascomycota	Sordariomycetes	Sordariomycetes_unclassified	Sordariomycetes_unclassified	Sordariomycetes_unclassified
Otu001564	Fungi	Mucoromycota	Mucoromycetes	Mucorales	Mucoraceae	Mucor
Otu001566	Fungi	Fungi_unclassified	Fungi_unclassified	Fungi_unclassified	Fungi_unclassified	Fungi_unclassified
Otu001567	Fungi	Fungi_unclassified	Fungi_unclassified	Fungi_unclassified	Fungi_unclassified	Fungi_unclassified
Otu001568	Fungi	Ascomycota	Pezizomycetes	Pezizales	Pezizaceae	Oedocephalum
Otu001569	Fungi	Ascomycota	Ascomycota_unclassified	Ascomycota_unclassified	Ascomycota_unclassified	Ascomycota_unclassified
Otu001570	Fungi	Ascomycota	Eurotiomycetes	Onygenales	Gymnoascaceae	Gymnoascaceae_unclassified
Otu001572	Fungi	Fungi_unclassified	Fungi_unclassified	Fungi_unclassified	Fungi_unclassified	Fungi_unclassified
Otu001573	Fungi	Ascomycota	Dothideomycetes	Pleosporales	Pleosporales_unclassified	Pleosporales_unclassified
Otu001574	Fungi	Ascomycota	Dothideomycetes	Venturiales	Sympoventuriaceae	Scolecobasidium
Otu001575	Fungi	Chytridiomycota	Lobulomycetes	Lobulomycetales	unclassified	unclassified
Otu001578	Fungi	Basidiomycota	Tremellomycetes	Tremellales	Rhynchogastremataceae	Papiliotrema
Otu001579	Fungi	Fungi_unclassified	Fungi_unclassified	Fungi_unclassified	Fungi_unclassified	Fungi_unclassified
Otu001580	Fungi	Chytridiomycota	Spizellomycetes	Spizellomycetales	Spizellomycetaceae	Gallinipes
Otu001582	Fungi	Ascomycota	Dothideomycetes	Venturiales	Sympoventuriaceae	Veronaeopsis
Otu001583	Fungi	Ascomycota	Dothideomycetes	Pleosporales	Sporormiaceae	Preussia
Otu001584	Fungi	Fungi_unclassified	Fungi_unclassified	Fungi_unclassified	Fungi_unclassified	Fungi_unclassified
Otu001587	Fungi	Fungi_unclassified	Fungi_unclassified	Fungi_unclassified	Fungi_unclassified	Fungi_unclassified
Otu001588	Fungi	Ascomycota	Sordariomycetes	Glomerellales	Plectosphaerellaceae	Plectosphaerella
Otu001589	Fungi	Basidiomycota	Tremellomycetes	Trichosporonales	Tetragoniomycetaceae	Tetragoniomyces
Otu001590	Fungi	Ascomycota	Eurotiomycetes	Eurotiales	Aspergillaceae	Penicillium
Otu001591	Fungi	Ascomycota	Sordariomycetes	Glomerellales	Plectosphaerellaceae	Gibellulopsis
Otu001592	Fungi	Fungi_unclassified	Fungi_unclassified	Fungi_unclassified	Fungi_unclassified	Fungi_unclassified
Otu001593	Fungi	Ascomycota	Sordariomycetes	Hypocreales	Nectriaceae	Fusarium
Otu001594	Fungi	Fungi_unclassified	Fungi_unclassified	Fungi_unclassified	Fungi_unclassified	Fungi_unclassified
Otu001595	Fungi	Fungi_unclassified	Fungi_unclassified	Fungi_unclassified	Fungi_unclassified	Fungi_unclassified
Otu001596	Fungi	Mortierellomycota	Mortierellomycetes	Mortierellales	Mortierellaceae	Linnemannia
Otu001597	Fungi	Basidiomycota	Agaricomycetes	Cantharellales	Ceratobasidiaceae	unclassified
Otu001600	Fungi	Ascomycota	Sordariomycetes	Sordariales	Podosporaceae	Cladorrhinum
Otu001601	Fungi	Basidiomycota	Agaricomycetes	Agaricales	Entolomataceae	Entoloma
Otu001602	Fungi	Ascomycota	Dothideomycetes	Pleosporales	Pleosporales_unclassified	Pleosporales_unclassified
Otu001603	Fungi	Ascomycota	Eurotiomycetes	Eurotiales	Aspergillaceae	Penicillium
Otu001604	Fungi	Ascomycota	Orbiliomycetes	Orbiliales	unclassified	unclassified
Otu001605	Fungi	Ascomycota	Orbiliomycetes	Orbiliales	Orbiliaceae	Orbiliaceae_unclassified
Otu001606	Fungi	Ascomycota	Sordariomycetes	Glomerellales	Plectosphaerellaceae	Plectosphaerellaceae_unclassified
Otu001607	Fungi	Fungi_unclassified	Fungi_unclassified	Fungi_unclassified	Fungi_unclassified	Fungi_unclassified
Otu001608	Fungi	Ascomycota	Leotiomycetes	Helotiales	Helotiaceae	Scytalidium
Otu001609	Fungi	Fungi_unclassified	Fungi_unclassified	Fungi_unclassified	Fungi_unclassified	Fungi_unclassified
Otu001610	Fungi	Fungi_unclassified	Fungi_unclassified	Fungi_unclassified	Fungi_unclassified	Fungi_unclassified
Otu001613	Fungi	Fungi_unclassified	Fungi_unclassified	Fungi_unclassified	Fungi_unclassified	Fungi_unclassified
Otu001614	Fungi	Ascomycota	Sordariomycetes	Hypocreales	Nectriaceae	Fusarium
Otu001615	Fungi	Ascomycota	Sordariomycetes	Glomerellales	Plectosphaerellaceae	Lectera
Otu001616	Fungi	Fungi_unclassified	Fungi_unclassified	Fungi_unclassified	Fungi_unclassified	Fungi_unclassified
Otu001617	Fungi	Ascomycota	Sordariomycetes	Magnaporthales	Magnaporthaceae	Arxiella
Otu001618	Fungi	Ascomycota	Saccharomycetes	Saccharomycetales	Debaryomycetaceae	Debaryomyces
Otu001620	Fungi	unclassified	unclassified	unclassified	unclassified	unclassified
Otu001621	Fungi	Fungi_unclassified	Fungi_unclassified	Fungi_unclassified	Fungi_unclassified	Fungi_unclassified
Otu001622	Fungi	unclassified	unclassified	unclassified	unclassified	unclassified
Otu001623	Fungi	Fungi_unclassified	Fungi_unclassified	Fungi_unclassified	Fungi_unclassified	Fungi_unclassified
Otu001624	Fungi	Fungi_unclassified	Fungi_unclassified	Fungi_unclassified	Fungi_unclassified	Fungi_unclassified
Otu001625	Fungi	Ascomycota	Sordariomycetes	Glomerellales	Plectosphaerellaceae	Plectosphaerellaceae_unclassified
Otu001626	Fungi	Mortierellomycota	Mortierellomycetes	Mortierellales	Mortierellaceae	Mortierellaceae_unclassified
Otu001629	Fungi	Ascomycota	Sordariomycetes	Hypocreales	Hypocreales_unclassified	Hypocreales_unclassified
Otu001630	Fungi	Fungi_unclassified	Fungi_unclassified	Fungi_unclassified	Fungi_unclassified	Fungi_unclassified
Otu001631	Fungi	Ascomycota	Dothideomycetes	Pleosporales	Tetraplosphaeriaceae	Tetraploa
Otu001633	Fungi	Rozellomycota	Rozellomycotina_cls_Incertae_sedis	GS05	unclassified	unclassified
Otu001634	Fungi	Chytridiomycota	Rhizophydiomycetes	Rhizophydiales	unclassified	unclassified
Otu001635	Fungi	Ascomycota	Sordariomycetes	Sordariomycetes_unclassified	Sordariomycetes_unclassified	Sordariomycetes_unclassified
Otu001636	Fungi	Fungi_unclassified	Fungi_unclassified	Fungi_unclassified	Fungi_unclassified	Fungi_unclassified
Otu001637	Fungi	Mucoromycota	Mucoromycetes	Mucorales	Mucoraceae	Mucor
Otu001638	Fungi	Ascomycota	Eurotiomycetes	Chaetothyriales	Cyphellophoraceae	Cyphellophora
Otu001639	Fungi	Ascomycota	Dothideomycetes	Capnodiales	Cladosporiaceae	Cladosporium
Otu001640	Fungi	Fungi_unclassified	Fungi_unclassified	Fungi_unclassified	Fungi_unclassified	Fungi_unclassified
Otu001641	Fungi	unclassified	unclassified	unclassified	unclassified	unclassified
Otu001642	Fungi	Fungi_unclassified	Fungi_unclassified	Fungi_unclassified	Fungi_unclassified	Fungi_unclassified
Otu001643	Fungi	Mortierellomycota	Mortierellomycetes	Mortierellales	Mortierellaceae	Mortierellaceae_unclassified
Otu001644	Fungi	Fungi_unclassified	Fungi_unclassified	Fungi_unclassified	Fungi_unclassified	Fungi_unclassified
Otu001645	Fungi	Fungi_unclassified	Fungi_unclassified	Fungi_unclassified	Fungi_unclassified	Fungi_unclassified
Otu001646	Fungi	Basidiomycota	Agaricomycetes	Corticiales	Corticiaceae	Waitea
Otu001648	Fungi	Fungi_unclassified	Fungi_unclassified	Fungi_unclassified	Fungi_unclassified	Fungi_unclassified
Otu001650	Fungi	Chytridiomycota	Chytridiomycota_unclassified	Chytridiomycota_unclassified	Chytridiomycota_unclassified	Chytridiomycota_unclassified
Otu001651	Fungi	Mortierellomycota	Mortierellomycetes	Mortierellales	Mortierellaceae	Mortierellaceae_unclassified
Otu001653	Fungi	Ascomycota	Sordariomycetes	Sordariales	Sordariales_unclassified	Sordariales_unclassified
Otu001654	Fungi	Fungi_unclassified	Fungi_unclassified	Fungi_unclassified	Fungi_unclassified	Fungi_unclassified
Otu001655	Fungi	Ascomycota	Sordariomycetes	Hypocreales	Nectriaceae	Volutella
Otu001656	Fungi	Ascomycota	Pezizomycetes	Pezizales	Pyronemataceae	Byssonectria
Otu001657	Fungi	Basidiomycota	Agaricomycetes	Thelephorales	Thelephoraceae	Tomentella
Otu001658	Fungi	Mortierellomycota	Mortierellomycetes	Mortierellales	Mortierellaceae	Mortierellaceae_unclassified
Otu001659	Fungi	Ascomycota	Dothideomycetes	Mycosphaerellales	Mycosphaerellaceae	Mycosphaerellaceae_unclassified
Otu001661	Fungi	Ascomycota	Sordariomycetes	Sordariales	Chaetomiaceae	Chaetomidium
Otu001662	Fungi	Fungi_unclassified	Fungi_unclassified	Fungi_unclassified	Fungi_unclassified	Fungi_unclassified
Otu001663	Fungi	Ascomycota	Ascomycota_unclassified	Ascomycota_unclassified	Ascomycota_unclassified	Ascomycota_unclassified
Otu001665	Fungi	Fungi_unclassified	Fungi_unclassified	Fungi_unclassified	Fungi_unclassified	Fungi_unclassified
Otu001667	Fungi	Basidiomycota	Agaricomycetes	Agaricales	Stephanosporaceae	Myriococcum
Otu001668	Fungi	Fungi_unclassified	Fungi_unclassified	Fungi_unclassified	Fungi_unclassified	Fungi_unclassified
Otu001670	Fungi	Ascomycota	Dothideomycetes	Pleosporales	Sporormiaceae	Sporormiaceae_unclassified
Otu001672	Fungi	Chytridiomycota	Rhizophlyctidomycetes	Rhizophlyctidales	Rhizophlyctidaceae	Rhizophlyctis
Otu001675	Fungi	Ascomycota	Eurotiomycetes	Eurotiales	Eurotiales_unclassified	Eurotiales_unclassified
Otu001676	Fungi	Ascomycota	Sordariomycetes	Glomerellales	Plectosphaerellaceae	Plectosphaerella
Otu001677	Fungi	Basidiomycota	Tremellomycetes	Tremellales	Rhynchogastremataceae	Papiliotrema
Otu001678	Fungi	Ascomycota	Ascomycota_unclassified	Ascomycota_unclassified	Ascomycota_unclassified	Ascomycota_unclassified
Otu001680	Fungi	Fungi_unclassified	Fungi_unclassified	Fungi_unclassified	Fungi_unclassified	Fungi_unclassified
Otu001682	Fungi	Fungi_unclassified	Fungi_unclassified	Fungi_unclassified	Fungi_unclassified	Fungi_unclassified
Otu001683	Fungi	Ascomycota	Sordariomycetes	Sordariales	Lasiosphaeriaceae	Schizothecium
Otu001684	Fungi	Fungi_unclassified	Fungi_unclassified	Fungi_unclassified	Fungi_unclassified	Fungi_unclassified
Otu001685	Fungi	Ascomycota	Eurotiomycetes	Eurotiales	Aspergillaceae	Penicillium
Otu001687	Fungi	Ascomycota	Dothideomycetes	Dothideomycetes_unclassified	Dothideomycetes_unclassified	Dothideomycetes_unclassified
Otu001688	Fungi	Ascomycota	Sordariomycetes	Hypocreales	Hypocreaceae	Trichoderma
Otu001689	Fungi	Ascomycota	Dothideomycetes	Capnodiales	Cladosporiaceae	Cladosporium
Otu001690	Fungi	Chytridiomycota	Spizellomycetes	Spizellomycetales	Spizellomycetales_unclassified	Spizellomycetales_unclassified
Otu001691	Fungi	Ascomycota	Orbiliomycetes	Orbiliales	Orbiliales_unclassified	Orbiliales_unclassified
Otu001692	Fungi	Ascomycota	Sordariomycetes	Hypocreales	Nectriaceae	Fusarium
Otu001693	Fungi	Fungi_unclassified	Fungi_unclassified	Fungi_unclassified	Fungi_unclassified	Fungi_unclassified
Otu001694	Fungi	Ascomycota	Sordariomycetes	Hypocreales	Nectriaceae	Fusarium
Otu001695	Fungi	Ascomycota	Eurotiomycetes	Eurotiomycetes_unclassified	Eurotiomycetes_unclassified	Eurotiomycetes_unclassified
Otu001696	Fungi	Ascomycota	Dothideomycetes	Pleosporales	Phaeosphaeriaceae	Phaeosphaeriaceae_unclassified
Otu001698	Fungi	Ascomycota	Eurotiomycetes	Chaetothyriales	Herpotrichiellaceae	Herpotrichiellaceae_unclassified
Otu001699	Fungi	Fungi_unclassified	Fungi_unclassified	Fungi_unclassified	Fungi_unclassified	Fungi_unclassified
Otu001700	Fungi	Ascomycota	Dothideomycetes	Dothideomycetes_unclassified	Dothideomycetes_unclassified	Dothideomycetes_unclassified
Otu001702	Fungi	Chytridiomycota	Chytridiomycota_unclassified	Chytridiomycota_unclassified	Chytridiomycota_unclassified	Chytridiomycota_unclassified
Otu001703	Fungi	Ascomycota	Eurotiomycetes	Eurotiales	Aspergillaceae	Penicillium
Otu001704	Fungi	Mucoromycota	Mucoromycetes	Mucorales	Rhizopodaceae	Rhizopus
Otu001706	Fungi	Fungi_unclassified	Fungi_unclassified	Fungi_unclassified	Fungi_unclassified	Fungi_unclassified
Otu001707	Fungi	Ascomycota	Leotiomycetes	Helotiales	Helotiaceae	Helotiaceae_unclassified
Otu001709	Fungi	Ascomycota	Sordariomycetes	Glomerellales	Plectosphaerellaceae	Gibellulopsis
Otu001710	Fungi	Ascomycota	Sordariomycetes	Hypocreales	Nectriaceae	Fusarium
Otu001712	Fungi	Fungi_unclassified	Fungi_unclassified	Fungi_unclassified	Fungi_unclassified	Fungi_unclassified
Otu001713	Fungi	Fungi_unclassified	Fungi_unclassified	Fungi_unclassified	Fungi_unclassified	Fungi_unclassified
Otu001714	Fungi	Fungi_unclassified	Fungi_unclassified	Fungi_unclassified	Fungi_unclassified	Fungi_unclassified
Otu001717	Fungi	Ascomycota	Ascomycota_unclassified	Ascomycota_unclassified	Ascomycota_unclassified	Ascomycota_unclassified
Otu001720	Fungi	Fungi_unclassified	Fungi_unclassified	Fungi_unclassified	Fungi_unclassified	Fungi_unclassified
Otu001721	Fungi	Ascomycota	Dothideomycetes	Acrospermales	Acrospermales_fam_Incertae_sedis	Leptodiscella
Otu001722	Fungi	Ascomycota	Dothideomycetes	Pleosporales	Pleomassariaceae	Tumularia
Otu001723	Fungi	Ascomycota	Dothideomycetes	Pleosporales	Pleosporales_unclassified	Pleosporales_unclassified
Otu001724	Fungi	Chytridiomycota	Chytridiomycota_unclassified	Chytridiomycota_unclassified	Chytridiomycota_unclassified	Chytridiomycota_unclassified
Otu001726	Fungi	Fungi_unclassified	Fungi_unclassified	Fungi_unclassified	Fungi_unclassified	Fungi_unclassified
Otu001727	Fungi	Ascomycota	Sordariomycetes	Hypocreales	Nectriaceae	Fusarium
Otu001728	Fungi	unclassified	unclassified	unclassified	unclassified	unclassified
Otu001729	Fungi	Fungi_unclassified	Fungi_unclassified	Fungi_unclassified	Fungi_unclassified	Fungi_unclassified
Otu001730	Fungi	Fungi_unclassified	Fungi_unclassified	Fungi_unclassified	Fungi_unclassified	Fungi_unclassified
Otu001732	Fungi	Ascomycota	Eurotiomycetes	Eurotiales	Aspergillaceae	Talaromyces
Otu001733	Fungi	unclassified	unclassified	unclassified	unclassified	unclassified
Otu001735	Fungi	Mucoromycota	Mucoromycetes	Mucorales	Cunninghamellaceae	Absidia
Otu001736	Fungi	Fungi_unclassified	Fungi_unclassified	Fungi_unclassified	Fungi_unclassified	Fungi_unclassified
Otu001737	Fungi	Ascomycota	Dothideomycetes	Pleosporales	Sporormiaceae	Preussia
Otu001738	Fungi	Mortierellomycota	Mortierellomycetes	Mortierellales	Mortierellaceae	Mortierellaceae_unclassified
Otu001739	Fungi	Fungi_unclassified	Fungi_unclassified	Fungi_unclassified	Fungi_unclassified	Fungi_unclassified
Otu001740	Fungi	Ascomycota	Sordariomycetes	Hypocreales	Bionectriaceae	Valsonectria
Otu001741	Fungi	Ascomycota	Sordariomycetes	Hypocreales	Hypocreaceae	Trichoderma
Otu001742	Fungi	Fungi_unclassified	Fungi_unclassified	Fungi_unclassified	Fungi_unclassified	Fungi_unclassified
Otu001743	Fungi	Ascomycota	Sordariomycetes	Hypocreales	Hypocreales_unclassified	Hypocreales_unclassified
Otu001744	Fungi	Ascomycota	Sordariomycetes	Hypocreales	Nectriaceae	Nectriaceae_unclassified
Otu001747	Fungi	Ascomycota	Sordariomycetes	Sordariomycetes_ord_Incertae_sedis	Papulosaceae	Wongia
Otu001749	Fungi	unclassified	unclassified	unclassified	unclassified	unclassified
Otu001750	Fungi	Mortierellomycota	Mortierellomycetes	Mortierellales	Mortierellaceae	Mortierella
Otu001751	Fungi	Basidiomycota	Tremellomycetes	Tremellales	Bulleribasidiaceae	Hannaella
Otu001752	Fungi	Fungi_unclassified	Fungi_unclassified	Fungi_unclassified	Fungi_unclassified	Fungi_unclassified
Otu001754	Fungi	Mucoromycota	Mucoromycetes	Mucorales	Cunninghamellaceae	Cunninghamellaceae_unclassified
Otu001755	Fungi	Ascomycota	Sordariomycetes	Sordariales	Chaetomiaceae	Chaetomiaceae_unclassified
Otu001756	Fungi	Ascomycota	Sordariomycetes	Sordariales	Lasiosphaeriaceae	Rinaldiella
Otu001757	Fungi	Chytridiomycota	Chytridiomycota_unclassified	Chytridiomycota_unclassified	Chytridiomycota_unclassified	Chytridiomycota_unclassified
Otu001758	Fungi	Fungi_unclassified	Fungi_unclassified	Fungi_unclassified	Fungi_unclassified	Fungi_unclassified
Otu001759	Fungi	Ascomycota	Ascomycota_unclassified	Ascomycota_unclassified	Ascomycota_unclassified	Ascomycota_unclassified
Otu001761	Fungi	Basidiomycota	Basidiomycota_unclassified	Basidiomycota_unclassified	Basidiomycota_unclassified	Basidiomycota_unclassified
Otu001762	Fungi	Ascomycota	Pezizomycetes	Pezizales	Sarcoscyphaceae	Sarcoscyphaceae_unclassified
Otu001763	Fungi	Fungi_unclassified	Fungi_unclassified	Fungi_unclassified	Fungi_unclassified	Fungi_unclassified
Otu001764	Fungi	Ascomycota	Sordariomycetes	Hypocreales	Niessliaceae	Eucasphaeria
Otu001765	Fungi	Ascomycota	Sordariomycetes	Glomerellales	Plectosphaerellaceae	Stachylidium
Otu001767	Fungi	Fungi_unclassified	Fungi_unclassified	Fungi_unclassified	Fungi_unclassified	Fungi_unclassified
Otu001768	Fungi	Ascomycota	Sordariomycetes	Hypocreales	Hypocreales_unclassified	Hypocreales_unclassified
Otu001770	Fungi	Fungi_unclassified	Fungi_unclassified	Fungi_unclassified	Fungi_unclassified	Fungi_unclassified
Otu001771	Fungi	Ascomycota	Sordariomycetes	Glomerellales	Plectosphaerellaceae	unclassified
Otu001772	Fungi	unclassified	unclassified	unclassified	unclassified	unclassified
Otu001773	Fungi	Fungi_unclassified	Fungi_unclassified	Fungi_unclassified	Fungi_unclassified	Fungi_unclassified
Otu001774	Fungi	Fungi_unclassified	Fungi_unclassified	Fungi_unclassified	Fungi_unclassified	Fungi_unclassified
Otu001775	Fungi	Fungi_unclassified	Fungi_unclassified	Fungi_unclassified	Fungi_unclassified	Fungi_unclassified
Otu001777	Fungi	Ascomycota	Eurotiomycetes	Eurotiales	Aspergillaceae	Talaromyces
Otu001778	Fungi	Ascomycota	Leotiomycetes	Helotiales	Myxotrichaceae	Oidiodendron
Otu001779	Fungi	Ascomycota	Sordariomycetes	Xylariales	Anungitiomycetaceae	unclassified
Otu001780	Fungi	Fungi_unclassified	Fungi_unclassified	Fungi_unclassified	Fungi_unclassified	Fungi_unclassified
Otu001781	Fungi	Ascomycota	Eurotiomycetes	Chaetothyriales	Chaetothyriales_unclassified	Chaetothyriales_unclassified
Otu001782	Fungi	Fungi_unclassified	Fungi_unclassified	Fungi_unclassified	Fungi_unclassified	Fungi_unclassified
Otu001783	Fungi	Ascomycota	Sordariomycetes	Hypocreales	Bionectriaceae	Clonostachys
Otu001784	Fungi	Ascomycota	Eurotiomycetes	Chaetothyriales	Herpotrichiellaceae	Cladophialophora
Otu001785	Fungi	Ascomycota	Ascomycota_unclassified	Ascomycota_unclassified	Ascomycota_unclassified	Ascomycota_unclassified
Otu001786	Fungi	Ascomycota	Sordariomycetes	Hypocreales	Nectriaceae	Fusarium
Otu001788	Fungi	Chytridiomycota	Cladochytriomycetes	Cladochytriales	Septochytriaceae	Septochytriaceae_unclassified
Otu001790	Fungi	Fungi_unclassified	Fungi_unclassified	Fungi_unclassified	Fungi_unclassified	Fungi_unclassified
Otu001791	Fungi	Fungi_unclassified	Fungi_unclassified	Fungi_unclassified	Fungi_unclassified	Fungi_unclassified
Otu001792	Fungi	Mucoromycota	Mucoromycetes	Mucorales	Mucoraceae	Mucoraceae_unclassified
Otu001793	Fungi	Rozellomycota	Rozellomycota_unclassified	Rozellomycota_unclassified	Rozellomycota_unclassified	Rozellomycota_unclassified
Otu001794	Fungi	Ascomycota	Sordariomycetes	Hypocreales	Ophiocordycipitaceae	Haptocillium
Otu001795	Fungi	unclassified	unclassified	unclassified	unclassified	unclassified
Otu001796	Fungi	Ascomycota	Orbiliomycetes	Orbiliales	Orbiliaceae	Arthrobotrys
Otu001798	Fungi	Fungi_unclassified	Fungi_unclassified	Fungi_unclassified	Fungi_unclassified	Fungi_unclassified
Otu001799	Fungi	Ascomycota	Dothideomycetes	Dothideales	Saccotheciaceae	Aureobasidium
Otu001803	Fungi	Ascomycota	Dothideomycetes	Pleosporales	Phaeosphaeriaceae	Phaeosphaeria
Otu001804	Fungi	Basidiomycota	Exobasidiomycetes	Entylomatales	Entylomataceae	Entyloma
Otu001805	Fungi	Mucoromycota	Mucoromycetes	Mucorales	Cunninghamellaceae	Gongronella
Otu001806	Fungi	Ascomycota	Sordariomycetes	Hypocreales	Nectriaceae	Fusarium
Otu001808	Fungi	Ascomycota	Eurotiomycetes	Eurotiales	Aspergillaceae	Aspergillus
Otu001809	Fungi	Ascomycota	Sordariomycetes	Hypocreales	Hypocreaceae	Trichoderma
Otu001810	Fungi	Ascomycota	Sordariomycetes	Sordariales	Chaetomiaceae	Chaetomiaceae_unclassified
Otu001811	Fungi	Fungi_unclassified	Fungi_unclassified	Fungi_unclassified	Fungi_unclassified	Fungi_unclassified
Otu001812	Fungi	unclassified	unclassified	unclassified	unclassified	unclassified
Otu001814	Fungi	Basidiomycota	Basidiomycota_unclassified	Basidiomycota_unclassified	Basidiomycota_unclassified	Basidiomycota_unclassified
Otu001815	Fungi	Fungi_unclassified	Fungi_unclassified	Fungi_unclassified	Fungi_unclassified	Fungi_unclassified
Otu001816	Fungi	Chytridiomycota	Spizellomycetes	Spizellomycetales	unclassified	unclassified
Otu001817	Fungi	Ascomycota	Sordariomycetes	Boliniales	Boliniales_fam_Incertae_sedis	unclassified
Otu001818	Fungi	Ascomycota	Sordariomycetes	Hypocreales	Nectriaceae	Fusarium
Otu001819	Fungi	Ascomycota	Sordariomycetes	Glomerellales	Plectosphaerellaceae	Gibellulopsis
Otu001820	Fungi	Fungi_unclassified	Fungi_unclassified	Fungi_unclassified	Fungi_unclassified	Fungi_unclassified
Otu001821	Fungi	Fungi_unclassified	Fungi_unclassified	Fungi_unclassified	Fungi_unclassified	Fungi_unclassified
Otu001822	Fungi	Basidiomycota	Basidiomycota_unclassified	Basidiomycota_unclassified	Basidiomycota_unclassified	Basidiomycota_unclassified
Otu001824	Fungi	unclassified	unclassified	unclassified	unclassified	unclassified
Otu001825	Fungi	Fungi_unclassified	Fungi_unclassified	Fungi_unclassified	Fungi_unclassified	Fungi_unclassified
Otu001826	Fungi	Ascomycota	Ascomycota_unclassified	Ascomycota_unclassified	Ascomycota_unclassified	Ascomycota_unclassified
Otu001827	Fungi	Fungi_unclassified	Fungi_unclassified	Fungi_unclassified	Fungi_unclassified	Fungi_unclassified
Otu001829	Fungi	Fungi_unclassified	Fungi_unclassified	Fungi_unclassified	Fungi_unclassified	Fungi_unclassified
Otu001830	Fungi	Basidiomycota	Agaricomycetes	Auriculariales	Auriculariales_fam_Incertae_sedis	Oliveonia
Otu001831	Fungi	Ascomycota	Sordariomycetes	Coniochaetales	Coniochaetaceae	Coniochaeta
Otu001832	Fungi	Ascomycota	Sordariomycetes	Chaetosphaeriales	Chaetosphaeriaceae	Chloridium
Otu001834	Fungi	Ascomycota	Sordariomycetes	Sordariales	Podosporaceae	Podosporaceae_unclassified
Otu001835	Fungi	Fungi_unclassified	Fungi_unclassified	Fungi_unclassified	Fungi_unclassified	Fungi_unclassified
Otu001838	Fungi	unclassified	unclassified	unclassified	unclassified	unclassified
Otu001839	Fungi	Fungi_unclassified	Fungi_unclassified	Fungi_unclassified	Fungi_unclassified	Fungi_unclassified
Otu001840	Fungi	Ascomycota	Sordariomycetes	Hypocreales	Nectriaceae	Pseudocosmospora
Otu001842	Fungi	Basidiomycota	Agaricomycetes	Agaricales	Lycoperdaceae	Disciseda
Otu001845	Fungi	Ascomycota	Dothideomycetes	Pleosporales	Didymosphaeriaceae	Didymosphaeriaceae_unclassified
Otu001846	Fungi	Chytridiomycota	Spizellomycetes	Spizellomycetales	Spizellomycetales_unclassified	Spizellomycetales_unclassified
Otu001849	Fungi	Ascomycota	Sordariomycetes	Sordariales	Chaetomiaceae	Chaetomidium
Otu001850	Fungi	unclassified	unclassified	unclassified	unclassified	unclassified
Otu001852	Fungi	unclassified	unclassified	unclassified	unclassified	unclassified
Otu001853	Fungi	Fungi_unclassified	Fungi_unclassified	Fungi_unclassified	Fungi_unclassified	Fungi_unclassified
Otu001854	Fungi	Ascomycota	Sordariomycetes	Hypocreales	Nectriaceae	Fusarium
Otu001856	Fungi	Ascomycota	Leotiomycetes	Helotiales	Sclerotiniaceae	Sclerotiniaceae_unclassified
Otu001857	Fungi	Ascomycota	Sordariomycetes	Sordariomycetes_unclassified	Sordariomycetes_unclassified	Sordariomycetes_unclassified
Otu001858	Fungi	Ascomycota	Leotiomycetes	Helotiales	Helotiales_unclassified	Helotiales_unclassified
Otu001859	Fungi	Ascomycota	Eurotiomycetes	Eurotiomycetes_unclassified	Eurotiomycetes_unclassified	Eurotiomycetes_unclassified
Otu001860	Fungi	Fungi_unclassified	Fungi_unclassified	Fungi_unclassified	Fungi_unclassified	Fungi_unclassified
Otu001862	Fungi	Ascomycota	Ascomycota_unclassified	Ascomycota_unclassified	Ascomycota_unclassified	Ascomycota_unclassified
Otu001863	Fungi	Chytridiomycota	Rhizophydiomycetes	Rhizophydiales	Rhizophydiaceae	Rhizophydium
Otu001866	Fungi	Basidiomycota	Agaricomycetes	Phallales	Phallaceae	Phallus
Otu001867	Fungi	Ascomycota	Orbiliomycetes	Orbiliales	Orbiliaceae	Orbilia
Otu001868	Fungi	Ascomycota	Sordariomycetes	Hypocreales	Nectriaceae	Fusarium
Otu001870	Fungi	Fungi_unclassified	Fungi_unclassified	Fungi_unclassified	Fungi_unclassified	Fungi_unclassified
Otu001871	Fungi	Ascomycota	Eurotiomycetes	Eurotiales	Aspergillaceae	Talaromyces
Otu001872	Fungi	Fungi_unclassified	Fungi_unclassified	Fungi_unclassified	Fungi_unclassified	Fungi_unclassified
Otu001874	Fungi	Mortierellomycota	Mortierellomycetes	Mortierellales	Mortierellaceae	Mortierellaceae_unclassified
Otu001875	Fungi	Ascomycota	Dothideomycetes	Pleosporales	Pleosporales_unclassified	Pleosporales_unclassified
Otu001877	Fungi	Ascomycota	Dothideomycetes	Pleosporales	Pleosporales_unclassified	Pleosporales_unclassified
Otu001878	Fungi	Ascomycota	Leotiomycetes	Helotiales	Hyaloscyphaceae	Rodwayella
Otu001881	Fungi	Fungi_unclassified	Fungi_unclassified	Fungi_unclassified	Fungi_unclassified	Fungi_unclassified
Otu001882	Fungi	Fungi_unclassified	Fungi_unclassified	Fungi_unclassified	Fungi_unclassified	Fungi_unclassified
Otu001883	Fungi	unclassified	unclassified	unclassified	unclassified	unclassified
Otu001884	Fungi	Rozellomycota	unclassified	unclassified	unclassified	unclassified
Otu001885	Fungi	unclassified	unclassified	unclassified	unclassified	unclassified
Otu001886	Fungi	unclassified	unclassified	unclassified	unclassified	unclassified
Otu001887	Fungi	Ascomycota	Sordariomycetes	Trichosphaeriales	Trichosphaeriaceae	Nigrospora
Otu001888	Fungi	Fungi_unclassified	Fungi_unclassified	Fungi_unclassified	Fungi_unclassified	Fungi_unclassified
Otu001889	Fungi	Ascomycota	Ascomycota_unclassified	Ascomycota_unclassified	Ascomycota_unclassified	Ascomycota_unclassified
Otu001890	Fungi	Fungi_unclassified	Fungi_unclassified	Fungi_unclassified	Fungi_unclassified	Fungi_unclassified
Otu001891	Fungi	unclassified	unclassified	unclassified	unclassified	unclassified
Otu001892	Fungi	Ascomycota	Ascomycota_unclassified	Ascomycota_unclassified	Ascomycota_unclassified	Ascomycota_unclassified
Otu001893	Fungi	Fungi_unclassified	Fungi_unclassified	Fungi_unclassified	Fungi_unclassified	Fungi_unclassified
Otu001895	Fungi	Ascomycota	Sordariomycetes	Hypocreales	Cordycipitaceae	Flavocillium
Otu001896	Fungi	Fungi_unclassified	Fungi_unclassified	Fungi_unclassified	Fungi_unclassified	Fungi_unclassified
Otu001897	Fungi	Fungi_unclassified	Fungi_unclassified	Fungi_unclassified	Fungi_unclassified	Fungi_unclassified
Otu001898	Fungi	Basidiomycota	Agaricomycetes	Agaricomycetes_unclassified	Agaricomycetes_unclassified	Agaricomycetes_unclassified
Otu001900	Fungi	Ascomycota	Eurotiomycetes	Chaetothyriales	Herpotrichiellaceae	Exophiala
Otu001901	Fungi	Ascomycota	Sordariomycetes	Hypocreales	Nectriaceae	Fusarium
Otu001902	Fungi	Fungi_unclassified	Fungi_unclassified	Fungi_unclassified	Fungi_unclassified	Fungi_unclassified
Otu001903	Fungi	Ascomycota	Dothideomycetes	Pleosporales	Phaeosphaeriaceae	Neosetophoma
Otu001904	Fungi	Fungi_unclassified	Fungi_unclassified	Fungi_unclassified	Fungi_unclassified	Fungi_unclassified
Otu001905	Fungi	Fungi_unclassified	Fungi_unclassified	Fungi_unclassified	Fungi_unclassified	Fungi_unclassified
Otu001906	Fungi	Rozellomycota	unclassified	unclassified	unclassified	unclassified
Otu001907	Fungi	Fungi_unclassified	Fungi_unclassified	Fungi_unclassified	Fungi_unclassified	Fungi_unclassified
Otu001908	Fungi	Chytridiomycota	Lobulomycetes	Lobulomycetes_unclassified	Lobulomycetes_unclassified	Lobulomycetes_unclassified
Otu001909	Fungi	Ascomycota	Sordariomycetes	Hypocreales	Hypocreaceae	Trichoderma
Otu001910	Fungi	Ascomycota	Saccharomycetes	Saccharomycetales	Debaryomycetaceae	Meyerozyma
Otu001911	Fungi	Fungi_unclassified	Fungi_unclassified	Fungi_unclassified	Fungi_unclassified	Fungi_unclassified
Otu001912	Fungi	Ascomycota	Eurotiomycetes	Eurotiales	Aspergillaceae	Talaromyces
Otu001913	Fungi	Ascomycota	Ascomycota_unclassified	Ascomycota_unclassified	Ascomycota_unclassified	Ascomycota_unclassified
Otu001914	Fungi	Ascomycota	Eurotiomycetes	Eurotiales	Aspergillaceae	Talaromyces
Otu001915	Fungi	unclassified	unclassified	unclassified	unclassified	unclassified
Otu001916	Fungi	Ascomycota	Taphrinomycetes	Taphrinales	Protomycetaceae	Protomyces
Otu001918	Fungi	Fungi_unclassified	Fungi_unclassified	Fungi_unclassified	Fungi_unclassified	Fungi_unclassified
Otu001919	Fungi	Ascomycota	Sordariomycetes	Hypocreales	Hypocreaceae	Trichoderma
Otu001920	Fungi	Chytridiomycota	unclassified	unclassified	unclassified	unclassified
Otu001922	Fungi	Ascomycota	Sordariomycetes	Sordariales	Podosporaceae	Podospora
Otu001923	Fungi	Fungi_unclassified	Fungi_unclassified	Fungi_unclassified	Fungi_unclassified	Fungi_unclassified
Otu001924	Fungi	Ascomycota	Dothideomycetes	Pleosporales	Lophiostomataceae	Neovaginatispora
Otu001926	Fungi	Fungi_unclassified	Fungi_unclassified	Fungi_unclassified	Fungi_unclassified	Fungi_unclassified
Otu001928	Fungi	Fungi_unclassified	Fungi_unclassified	Fungi_unclassified	Fungi_unclassified	Fungi_unclassified
Otu001929	Fungi	Fungi_unclassified	Fungi_unclassified	Fungi_unclassified	Fungi_unclassified	Fungi_unclassified
Otu001930	Fungi	Ascomycota	Sordariomycetes	Hypocreales	Nectriaceae	Fusarium
Otu001931	Fungi	Ascomycota	Sordariomycetes	Sordariomycetes_unclassified	Sordariomycetes_unclassified	Sordariomycetes_unclassified
Otu001933	Fungi	Fungi_unclassified	Fungi_unclassified	Fungi_unclassified	Fungi_unclassified	Fungi_unclassified
Otu001936	Fungi	Fungi_unclassified	Fungi_unclassified	Fungi_unclassified	Fungi_unclassified	Fungi_unclassified
Otu001937	Fungi	Fungi_unclassified	Fungi_unclassified	Fungi_unclassified	Fungi_unclassified	Fungi_unclassified
Otu001938	Fungi	Ascomycota	Sordariomycetes	Sordariomycetes_unclassified	Sordariomycetes_unclassified	Sordariomycetes_unclassified
Otu001939	Fungi	Mortierellomycota	Mortierellomycetes	Mortierellales	Mortierellaceae	Mortierellaceae_unclassified
Otu001943	Fungi	Fungi_unclassified	Fungi_unclassified	Fungi_unclassified	Fungi_unclassified	Fungi_unclassified
Otu001944	Fungi	Ascomycota	Sordariomycetes	Coniochaetales	Coniochaetaceae	Coniochaetaceae_unclassified
Otu001945	Fungi	Ascomycota	Dothideomycetes	Pleosporales	Pleosporales_unclassified	Pleosporales_unclassified
Otu001946	Fungi	Ascomycota	Ascomycota_unclassified	Ascomycota_unclassified	Ascomycota_unclassified	Ascomycota_unclassified
Otu001947	Fungi	Ascomycota	Eurotiomycetes	Eurotiomycetes_unclassified	Eurotiomycetes_unclassified	Eurotiomycetes_unclassified
Otu001948	Fungi	Rozellomycota	Rozellomycotina_cls_Incertae_sedis	GS11	unclassified	unclassified
Otu001949	Fungi	Fungi_unclassified	Fungi_unclassified	Fungi_unclassified	Fungi_unclassified	Fungi_unclassified
Otu001953	Fungi	Ascomycota	Sordariomycetes	Sordariomycetes_unclassified	Sordariomycetes_unclassified	Sordariomycetes_unclassified
Otu001954	Fungi	Ascomycota	Sordariomycetes	Hypocreales	Nectriaceae	Fusarium
Otu001955	Fungi	Fungi_unclassified	Fungi_unclassified	Fungi_unclassified	Fungi_unclassified	Fungi_unclassified
Otu001957	Fungi	Ascomycota	Sordariomycetes	Sordariales	Chaetomiaceae	Chaetomium
Otu001959	Fungi	Basidiomycota	Tremellomycetes	Tremellales	Bulleribasidiaceae	Vishniacozyma
Otu001960	Fungi	Chytridiomycota	Spizellomycetes	Spizellomycetales	unclassified	unclassified
Otu001961	Fungi	Fungi_unclassified	Fungi_unclassified	Fungi_unclassified	Fungi_unclassified	Fungi_unclassified
Otu001963	Fungi	Ascomycota	Sordariomycetes	Hypocreales	Hypocreales_fam_Incertae_sedis	Sarocladium
Otu001964	Fungi	Ascomycota	Pezizomycetes	Pezizales	Pyronemataceae	Scutellinia
Otu001966	Fungi	Ascomycota	Ascomycota_unclassified	Ascomycota_unclassified	Ascomycota_unclassified	Ascomycota_unclassified
Otu001967	Fungi	Ascomycota	Eurotiomycetes	Eurotiales	Trichocomaceae	Sagenomella
Otu001968	Fungi	Basidiomycota	Agaricomycetes	Agaricales	Psathyrellaceae	Coprinellus
Otu001971	Fungi	Ascomycota	Dothideomycetes	Pleosporales	Phaeosphaeriaceae	Ophiosphaerella
Otu001972	Fungi	unclassified	unclassified	unclassified	unclassified	unclassified
Otu001974	Fungi	Ascomycota	Sordariomycetes	Sordariomycetes_unclassified	Sordariomycetes_unclassified	Sordariomycetes_unclassified
Otu001975	Fungi	Fungi_unclassified	Fungi_unclassified	Fungi_unclassified	Fungi_unclassified	Fungi_unclassified
Otu001977	Fungi	Olpidiomycota	Olpidiomycetes	Olpidiales	Olpidiaceae	Olpidium
Otu001978	Fungi	Ascomycota	Sordariomycetes	Xylariales	Xylariales_fam_Incertae_sedis	Fusidium
Otu001979	Fungi	Ascomycota	Eurotiomycetes	Chaetothyriales	Herpotrichiellaceae	Exophiala
Otu001980	Fungi	Fungi_unclassified	Fungi_unclassified	Fungi_unclassified	Fungi_unclassified	Fungi_unclassified
Otu001981	Fungi	Ascomycota	Sordariomycetes	Glomerellales	Plectosphaerellaceae	Plectosphaerellaceae_unclassified
Otu001982	Fungi	Fungi_unclassified	Fungi_unclassified	Fungi_unclassified	Fungi_unclassified	Fungi_unclassified
Otu001983	Fungi	Ascomycota	Sordariomycetes	Sordariales	Lasiosphaeriaceae	Schizothecium
Otu001984	Fungi	Ascomycota	Dothideomycetes	Tubeufiales	Tubeufiaceae	unclassified
Otu001985	Fungi	Fungi_unclassified	Fungi_unclassified	Fungi_unclassified	Fungi_unclassified	Fungi_unclassified
Otu001986	Fungi	Ascomycota	Sordariomycetes	Branch06	unclassified	unclassified
Otu001988	Fungi	Ascomycota	Sordariomycetes	Diaporthales	Melanconidaceae	Melanconiella
Otu001989	Fungi	Fungi_unclassified	Fungi_unclassified	Fungi_unclassified	Fungi_unclassified	Fungi_unclassified
Otu001990	Fungi	Basidiomycota	Agaricomycetes	Agaricales	Lycoperdaceae	Holocotylon
Otu001991	Fungi	Ascomycota	Sordariomycetes	Coniochaetales	Coniochaetaceae	Coniochaetaceae_unclassified
Otu001992	Fungi	Basidiomycota	Basidiomycota_unclassified	Basidiomycota_unclassified	Basidiomycota_unclassified	Basidiomycota_unclassified
Otu001994	Fungi	unclassified	unclassified	unclassified	unclassified	unclassified
Otu001995	Fungi	Ascomycota	Ascomycota_unclassified	Ascomycota_unclassified	Ascomycota_unclassified	Ascomycota_unclassified
Otu001996	Fungi	Basidiomycota	Tremellomycetes	Tremellales	Trimorphomycetaceae	Saitozyma
Otu001997	Fungi	Ascomycota	Orbiliomycetes	Orbiliales	Orbiliaceae	Arthrobotrys
Otu001998	Fungi	Ascomycota	Dothideomycetes	Venturiales	Sympoventuriaceae	Scolecobasidium
Otu002000	Fungi	unclassified	unclassified	unclassified	unclassified	unclassified
Otu002001	Fungi	Mortierellomycota	Mortierellomycetes	Mortierellales	Mortierellaceae	Mortierellaceae_unclassified
Otu002002	Fungi	Ascomycota	Dothideomycetes	Pleosporales	Phaeosphaeriaceae	Phaeosphaeriaceae_unclassified
Otu002004	Fungi	Ascomycota	Ascomycota_unclassified	Ascomycota_unclassified	Ascomycota_unclassified	Ascomycota_unclassified
Otu002005	Fungi	Ascomycota	Sordariomycetes	Hypocreales	Hypocreaceae	Trichoderma
Otu002006	Fungi	Fungi_unclassified	Fungi_unclassified	Fungi_unclassified	Fungi_unclassified	Fungi_unclassified
Otu002008	Fungi	Ascomycota	Sordariomycetes	Glomerellales	Plectosphaerellaceae	Plectosphaerellaceae_unclassified
Otu002009	Fungi	Ascomycota	Orbiliomycetes	Orbiliales	Orbiliaceae	Arthrobotrys
Otu002010	Fungi	Ascomycota	Sordariomycetes	Glomerellales	Plectosphaerellaceae	Plectosphaerella
Otu002011	Fungi	Ascomycota	Sordariomycetes	Sordariales	Podosporaceae	Cladorrhinum
Otu002013	Fungi	Fungi_unclassified	Fungi_unclassified	Fungi_unclassified	Fungi_unclassified	Fungi_unclassified
Otu002014	Fungi	unclassified	unclassified	unclassified	unclassified	unclassified
Otu002015	Fungi	Ascomycota	Sordariomycetes	Sordariales	Chaetomiaceae	Chaetomiaceae_unclassified
Otu002016	Fungi	Ascomycota	Sordariomycetes	Glomerellales	Plectosphaerellaceae	Plectosphaerella
Otu002017	Fungi	Ascomycota	Sordariomycetes	Hypocreales	Ophiocordycipitaceae	Hirsutella
Otu002018	Fungi	unclassified	unclassified	unclassified	unclassified	unclassified
Otu002019	Fungi	Fungi_unclassified	Fungi_unclassified	Fungi_unclassified	Fungi_unclassified	Fungi_unclassified
Otu002020	Fungi	Fungi_unclassified	Fungi_unclassified	Fungi_unclassified	Fungi_unclassified	Fungi_unclassified
Otu002021	Fungi	Fungi_unclassified	Fungi_unclassified	Fungi_unclassified	Fungi_unclassified	Fungi_unclassified
Otu002022	Fungi	Fungi_unclassified	Fungi_unclassified	Fungi_unclassified	Fungi_unclassified	Fungi_unclassified
Otu002023	Fungi	Mortierellomycota	Mortierellomycetes	Mortierellales	Mortierellaceae	Mortierellaceae_unclassified
Otu002025	Fungi	Mucoromycota	Mucoromycetes	Mucorales	Mucoraceae	Actinomucor
Otu002026	Fungi	Mortierellomycota	Mortierellomycetes	Mortierellales	Mortierellaceae	Mortierellaceae_unclassified
Otu002027	Fungi	Fungi_unclassified	Fungi_unclassified	Fungi_unclassified	Fungi_unclassified	Fungi_unclassified
Otu002031	Fungi	Fungi_unclassified	Fungi_unclassified	Fungi_unclassified	Fungi_unclassified	Fungi_unclassified
Otu002033	Fungi	Ascomycota	Sordariomycetes	Glomerellales	Plectosphaerellaceae	Furcasterigmium
Otu002034	Fungi	Ascomycota	Sordariomycetes	Hypocreales	Nectriaceae	Fusarium
Otu002035	Fungi	Ascomycota	Orbiliomycetes	Orbiliomycetes_unclassified	Orbiliomycetes_unclassified	Orbiliomycetes_unclassified
Otu002037	Fungi	Ascomycota	Sordariomycetes	Hypocreales	Hypocreales_unclassified	Hypocreales_unclassified
Otu002038	Fungi	Ascomycota	Sordariomycetes	Hypocreales	Nectriaceae	Fusarium
Otu002039	Fungi	Fungi_unclassified	Fungi_unclassified	Fungi_unclassified	Fungi_unclassified	Fungi_unclassified
Otu002041	Fungi	Fungi_unclassified	Fungi_unclassified	Fungi_unclassified	Fungi_unclassified	Fungi_unclassified
Otu002042	Fungi	Ascomycota	Sordariomycetes	Hypocreales	Hypocreaceae	Trichoderma
Otu002046	Fungi	Ascomycota	Sordariomycetes	Hypocreales	Nectriaceae	Nectriaceae_unclassified
Otu002047	Fungi	Ascomycota	Sordariomycetes	Sordariomycetes_unclassified	Sordariomycetes_unclassified	Sordariomycetes_unclassified
Otu002048	Fungi	Chytridiomycota	unclassified	unclassified	unclassified	unclassified
Otu002050	Fungi	Ascomycota	Sordariomycetes	Sordariales	Sordariales_unclassified	Sordariales_unclassified
Otu002052	Fungi	Fungi_unclassified	Fungi_unclassified	Fungi_unclassified	Fungi_unclassified	Fungi_unclassified
Otu002053	Fungi	Fungi_unclassified	Fungi_unclassified	Fungi_unclassified	Fungi_unclassified	Fungi_unclassified
Otu002054	Fungi	unclassified	unclassified	unclassified	unclassified	unclassified
Otu002055	Fungi	unclassified	unclassified	unclassified	unclassified	unclassified
Otu002056	Fungi	Ascomycota	Ascomycota_unclassified	Ascomycota_unclassified	Ascomycota_unclassified	Ascomycota_unclassified
Otu002057	Fungi	Ascomycota	Eurotiomycetes	Eurotiales	Aspergillaceae	Penicillium
Otu002058	Fungi	Ascomycota	Orbiliomycetes	Orbiliales	Orbiliaceae	Arthrobotrys
Otu002060	Fungi	Chytridiomycota	Spizellomycetes	Spizellomycetales	Spizellomycetales_unclassified	Spizellomycetales_unclassified
Otu002061	Fungi	Fungi_unclassified	Fungi_unclassified	Fungi_unclassified	Fungi_unclassified	Fungi_unclassified
Otu002063	Fungi	Mucoromycota	Mucoromycetes	Mucorales	Cunninghamellaceae	Absidia
Otu002064	Fungi	Fungi_unclassified	Fungi_unclassified	Fungi_unclassified	Fungi_unclassified	Fungi_unclassified
Otu002065	Fungi	Ascomycota	Sordariomycetes	Glomerellales	Plectosphaerellaceae	Plectosphaerellaceae_unclassified
Otu002067	Fungi	Ascomycota	Dothideomycetes	Venturiales	Sympoventuriaceae	Sympoventuriaceae_unclassified
Otu002068	Fungi	Ascomycota	Eurotiomycetes	Eurotiales	Aspergillaceae	Penicillium
Otu002070	Fungi	Ascomycota	Sordariomycetes	Hypocreales	Hypocreaceae	Trichoderma
Otu002072	Fungi	Ascomycota	Dothideomycetes	Pleosporales	Cucurbitariaceae	Pyrenochaetopsis
Otu002077	Fungi	Ascomycota	Sordariomycetes	Hypocreales	Nectriaceae	Fusarium
Otu002078	Fungi	Ascomycota	Sordariomycetes	Sordariales	Chaetomiaceae	Chaetomiaceae_unclassified
Otu002079	Fungi	Ascomycota	Sordariomycetes	Hypocreales	Bionectriaceae	Clonostachys
Otu002080	Fungi	Basidiomycota	Agaricomycetes	Agaricales	Agaricales_unclassified	Agaricales_unclassified
Otu002081	Fungi	Ascomycota	Dothideomycetes	Pleosporales	Didymellaceae	Didymellaceae_unclassified
Otu002082	Fungi	Ascomycota	Sordariomycetes	Sordariales	Sordariales_unclassified	Sordariales_unclassified
Otu002083	Fungi	unclassified	unclassified	unclassified	unclassified	unclassified
Otu002084	Fungi	Ascomycota	Sordariomycetes	Sordariales	Chaetomiaceae	Humicola
Otu002086	Fungi	Fungi_unclassified	Fungi_unclassified	Fungi_unclassified	Fungi_unclassified	Fungi_unclassified
Otu002087	Fungi	Chytridiomycota	unclassified	unclassified	unclassified	unclassified
Otu002089	Fungi	Ascomycota	Eurotiomycetes	Eurotiales	Aspergillaceae	Talaromyces
Otu002090	Fungi	Fungi_unclassified	Fungi_unclassified	Fungi_unclassified	Fungi_unclassified	Fungi_unclassified
Otu002091	Fungi	Fungi_unclassified	Fungi_unclassified	Fungi_unclassified	Fungi_unclassified	Fungi_unclassified
Otu002094	Fungi	Fungi_unclassified	Fungi_unclassified	Fungi_unclassified	Fungi_unclassified	Fungi_unclassified
Otu002096	Fungi	Basidiomycota	Agaricomycetes	Polyporales	Ganodermataceae	Ganoderma
Otu002097	Fungi	Ascomycota	Dothideomycetes	Pleosporales	Didymosphaeriaceae	Didymosphaeriaceae_unclassified
Otu002098	Fungi	Ascomycota	Ascomycota_unclassified	Ascomycota_unclassified	Ascomycota_unclassified	Ascomycota_unclassified
Otu002099	Fungi	Fungi_unclassified	Fungi_unclassified	Fungi_unclassified	Fungi_unclassified	Fungi_unclassified
Otu002101	Fungi	Ascomycota	Ascomycota_unclassified	Ascomycota_unclassified	Ascomycota_unclassified	Ascomycota_unclassified
Otu002102	Fungi	Ascomycota	Sordariomycetes	Sordariales	Chaetomiaceae	Chaetomiaceae_unclassified
Otu002104	Fungi	Fungi_unclassified	Fungi_unclassified	Fungi_unclassified	Fungi_unclassified	Fungi_unclassified
Otu002105	Fungi	Basidiomycota	Agaricomycetes	Agaricales	Lycoperdaceae	Lycoperdon
Otu002106	Fungi	Fungi_unclassified	Fungi_unclassified	Fungi_unclassified	Fungi_unclassified	Fungi_unclassified
Otu002109	Fungi	Rozellomycota	Rozellomycotina_cls_Incertae_sedis	GS05	unclassified	unclassified
Otu002113	Fungi	Fungi_unclassified	Fungi_unclassified	Fungi_unclassified	Fungi_unclassified	Fungi_unclassified
Otu002115	Fungi	Ascomycota	Ascomycota_unclassified	Ascomycota_unclassified	Ascomycota_unclassified	Ascomycota_unclassified
Otu002116	Fungi	Ascomycota	Eurotiomycetes	Eurotiales	Aspergillaceae	Penicillium
Otu002117	Fungi	Fungi_unclassified	Fungi_unclassified	Fungi_unclassified	Fungi_unclassified	Fungi_unclassified
Otu002118	Fungi	Fungi_unclassified	Fungi_unclassified	Fungi_unclassified	Fungi_unclassified	Fungi_unclassified
Otu002119	Fungi	Ascomycota	Sordariomycetes	Sordariales	Chaetomiaceae	Chaetomiaceae_unclassified
Otu002120	Fungi	Chytridiomycota	Spizellomycetes	Spizellomycetales	Powellomycetaceae	Powellomyces
Otu002122	Fungi	Ascomycota	Ascomycota_unclassified	Ascomycota_unclassified	Ascomycota_unclassified	Ascomycota_unclassified
Otu002123	Fungi	Basidiomycota	Microbotryomycetes	Microbotryomycetes_ord_Incertae_sedis	Chrysozymaceae	Udeniozyma
Otu002124	Fungi	Fungi_unclassified	Fungi_unclassified	Fungi_unclassified	Fungi_unclassified	Fungi_unclassified
Otu002125	Fungi	unclassified	unclassified	unclassified	unclassified	unclassified
Otu002126	Fungi	Basidiomycota	Microbotryomycetes	Sporidiobolales	Sporidiobolaceae	Rhodosporidiobolus
Otu002128	Fungi	Ascomycota	Dothideomycetes	Pleosporales	Didymellaceae	Didymellaceae_unclassified
Otu002129	Fungi	Ascomycota	Sordariomycetes	Hypocreales	Hypocreales_unclassified	Hypocreales_unclassified
Otu002130	Fungi	unclassified	unclassified	unclassified	unclassified	unclassified
Otu002131	Fungi	Ascomycota	Orbiliomycetes	Orbiliales	unclassified	unclassified
Otu002132	Fungi	Fungi_unclassified	Fungi_unclassified	Fungi_unclassified	Fungi_unclassified	Fungi_unclassified
Otu002133	Fungi	Fungi_unclassified	Fungi_unclassified	Fungi_unclassified	Fungi_unclassified	Fungi_unclassified
Otu002135	Fungi	Fungi_unclassified	Fungi_unclassified	Fungi_unclassified	Fungi_unclassified	Fungi_unclassified
Otu002136	Fungi	Chytridiomycota	Rhizophydiomycetes	Rhizophydiales	Alphamycetaceae	Betamyces
Otu002138	Fungi	Fungi_unclassified	Fungi_unclassified	Fungi_unclassified	Fungi_unclassified	Fungi_unclassified
Otu002139	Fungi	Chytridiomycota	Spizellomycetes	Spizellomycetales	unclassified	unclassified
Otu002140	Fungi	Fungi_unclassified	Fungi_unclassified	Fungi_unclassified	Fungi_unclassified	Fungi_unclassified
Otu002141	Fungi	unclassified	unclassified	unclassified	unclassified	unclassified
Otu002142	Fungi	Fungi_unclassified	Fungi_unclassified	Fungi_unclassified	Fungi_unclassified	Fungi_unclassified
Otu002144	Fungi	Ascomycota	Sordariomycetes	Hypocreales	Hypocreaceae	Trichoderma
Otu002145	Fungi	Basidiomycota	Tremellomycetes	Tremellales	Bulleribasidiaceae	Dioszegia
Otu002146	Fungi	Ascomycota	Leotiomycetes	Helotiales	Helotiaceae	Glarea
Otu002147	Fungi	Fungi_unclassified	Fungi_unclassified	Fungi_unclassified	Fungi_unclassified	Fungi_unclassified
Otu002150	Fungi	Fungi_unclassified	Fungi_unclassified	Fungi_unclassified	Fungi_unclassified	Fungi_unclassified
Otu002151	Fungi	Fungi_unclassified	Fungi_unclassified	Fungi_unclassified	Fungi_unclassified	Fungi_unclassified
Otu002152	Fungi	Fungi_unclassified	Fungi_unclassified	Fungi_unclassified	Fungi_unclassified	Fungi_unclassified
Otu002154	Fungi	Basidiomycota	Agaricomycetes	Hymenochaetales	Schizoporaceae	Schizoporaceae_unclassified
Otu002157	Fungi	Ascomycota	Sordariomycetes	Hypocreales	Clavicipitaceae	unclassified
Otu002161	Fungi	Basidiomycota	Agaricomycetes	Sebacinales	Serendipitaceae	Serendipita
Otu002163	Fungi	Ascomycota	Eurotiomycetes	Eurotiales	Aspergillaceae	Penicillium
Otu002164	Fungi	Ascomycota	Eurotiomycetes	Chaetothyriales	Trichomeriaceae	Arthrocladium
Otu002166	Fungi	unclassified	unclassified	unclassified	unclassified	unclassified
Otu002168	Fungi	Ascomycota	Ascomycota_unclassified	Ascomycota_unclassified	Ascomycota_unclassified	Ascomycota_unclassified
Otu002169	Fungi	Fungi_unclassified	Fungi_unclassified	Fungi_unclassified	Fungi_unclassified	Fungi_unclassified
Otu002170	Fungi	Fungi_unclassified	Fungi_unclassified	Fungi_unclassified	Fungi_unclassified	Fungi_unclassified
Otu002171	Fungi	Fungi_unclassified	Fungi_unclassified	Fungi_unclassified	Fungi_unclassified	Fungi_unclassified
Otu002174	Fungi	Ascomycota	Sordariomycetes	Sordariales	Lasiosphaeriaceae	Schizothecium
Otu002175	Fungi	Chytridiomycota	Spizellomycetes	Spizellomycetales	Spizellomycetaceae	Spizellomyces
Otu002176	Fungi	Fungi_unclassified	Fungi_unclassified	Fungi_unclassified	Fungi_unclassified	Fungi_unclassified
Otu002177	Fungi	Ascomycota	Sordariomycetes	Hypocreales	Nectriaceae	Nectriaceae_unclassified
Otu002178	Fungi	Chytridiomycota	Spizellomycetes	Spizellomycetales	Spizellomycetaceae	Kochiomyces
Otu002179	Fungi	Fungi_unclassified	Fungi_unclassified	Fungi_unclassified	Fungi_unclassified	Fungi_unclassified
Otu002180	Fungi	unclassified	unclassified	unclassified	unclassified	unclassified
Otu002181	Fungi	Mucoromycota	Mucoromycetes	Mucorales	Mucoraceae	Mucoraceae_unclassified
Otu002182	Fungi	Fungi_unclassified	Fungi_unclassified	Fungi_unclassified	Fungi_unclassified	Fungi_unclassified
Otu002184	Fungi	Fungi_unclassified	Fungi_unclassified	Fungi_unclassified	Fungi_unclassified	Fungi_unclassified
Otu002186	Fungi	Fungi_unclassified	Fungi_unclassified	Fungi_unclassified	Fungi_unclassified	Fungi_unclassified
Otu002189	Fungi	Rozellomycota	Rozellomycotina_cls_Incertae_sedis	GS05	unclassified	unclassified
Otu002190	Fungi	Ascomycota	Leotiomycetes	Helotiales	Helotiales_unclassified	Helotiales_unclassified
Otu002193	Fungi	Ascomycota	Sordariomycetes	Sordariales	Sordariaceae	Diplogelasinospora
Otu002194	Fungi	Basidiomycota	Agaricomycetes	Cantharellales	Hydnaceae	Sistotrema
Otu002195	Fungi	Fungi_unclassified	Fungi_unclassified	Fungi_unclassified	Fungi_unclassified	Fungi_unclassified
Otu002196	Fungi	Fungi_unclassified	Fungi_unclassified	Fungi_unclassified	Fungi_unclassified	Fungi_unclassified
Otu002197	Fungi	Fungi_unclassified	Fungi_unclassified	Fungi_unclassified	Fungi_unclassified	Fungi_unclassified
Otu002198	Fungi	Ascomycota	Sordariomycetes	Hypocreales	Nectriaceae	Nectriaceae_unclassified
Otu002200	Fungi	Mucoromycota	Mucoromycetes	Mucorales	Mucoraceae	Mucoraceae_unclassified
Otu002202	Fungi	Fungi_unclassified	Fungi_unclassified	Fungi_unclassified	Fungi_unclassified	Fungi_unclassified
Otu002203	Fungi	Chytridiomycota	Spizellomycetes	Spizellomycetales	unclassified	unclassified
Otu002205	Fungi	Fungi_unclassified	Fungi_unclassified	Fungi_unclassified	Fungi_unclassified	Fungi_unclassified
Otu002206	Fungi	unclassified	unclassified	unclassified	unclassified	unclassified
Otu002207	Fungi	Basidiomycota	Atractiellomycetes	Atractiellales	Phleogenaceae	Bourdotigloea
Otu002208	Fungi	Fungi_unclassified	Fungi_unclassified	Fungi_unclassified	Fungi_unclassified	Fungi_unclassified
Otu002212	Fungi	Glomeromycota	Glomeromycetes	Gigasporales	Gigasporaceae	Gigaspora
Otu002214	Fungi	Fungi_unclassified	Fungi_unclassified	Fungi_unclassified	Fungi_unclassified	Fungi_unclassified
Otu002215	Fungi	Ascomycota	Sordariomycetes	Sordariales	Chaetomiaceae	Chaetomiaceae_unclassified
Otu002216	Fungi	Fungi_unclassified	Fungi_unclassified	Fungi_unclassified	Fungi_unclassified	Fungi_unclassified
Otu002217	Fungi	Basidiomycota	Agaricomycetes	Agaricales	Entolomataceae	Entolomataceae_unclassified
Otu002218	Fungi	Fungi_unclassified	Fungi_unclassified	Fungi_unclassified	Fungi_unclassified	Fungi_unclassified
Otu002219	Fungi	Basidiomycota	Agaricomycetes	Sebacinales	Serendipitaceae	Serendipita
Otu002220	Fungi	Ascomycota	Ascomycota_unclassified	Ascomycota_unclassified	Ascomycota_unclassified	Ascomycota_unclassified
Otu002221	Fungi	Fungi_unclassified	Fungi_unclassified	Fungi_unclassified	Fungi_unclassified	Fungi_unclassified
Otu002222	Fungi	Fungi_unclassified	Fungi_unclassified	Fungi_unclassified	Fungi_unclassified	Fungi_unclassified
Otu002224	Fungi	Basidiomycota	Tremellomycetes	Tremellales	Trimorphomycetaceae	Saitozyma
Otu002226	Fungi	Basidiomycota	Agaricomycetes	Sebacinales	Serendipitaceae	Serendipita
Otu002227	Fungi	Fungi_unclassified	Fungi_unclassified	Fungi_unclassified	Fungi_unclassified	Fungi_unclassified
Otu002231	Fungi	Ascomycota	Dothideomycetes	Venturiales	Sympoventuriaceae	Verruconis
Otu002232	Fungi	Chytridiomycota	unclassified	unclassified	unclassified	unclassified
Otu002236	Fungi	Rozellomycota	Rozellomycotina_cls_Incertae_sedis	GS09	unclassified	unclassified
Otu002237	Fungi	Ascomycota	Leotiomycetes	Helotiales	Helotiales_unclassified	Helotiales_unclassified
Otu002242	Fungi	Ascomycota	Ascomycota_unclassified	Ascomycota_unclassified	Ascomycota_unclassified	Ascomycota_unclassified
Otu002243	Fungi	Basidiomycota	Basidiomycota_unclassified	Basidiomycota_unclassified	Basidiomycota_unclassified	Basidiomycota_unclassified
Otu002244	Fungi	Fungi_unclassified	Fungi_unclassified	Fungi_unclassified	Fungi_unclassified	Fungi_unclassified
Otu002245	Fungi	Ascomycota	Ascomycota_unclassified	Ascomycota_unclassified	Ascomycota_unclassified	Ascomycota_unclassified
Otu002246	Fungi	Ascomycota	Dothideomycetes	Pleosporales	Lophiostomataceae	Flabellascoma
Otu002248	Fungi	Mortierellomycota	Mortierellomycetes	Mortierellales	Mortierellaceae	Mortierellaceae_unclassified
Otu002249	Fungi	Chytridiomycota	unclassified	unclassified	unclassified	unclassified
Otu002251	Fungi	Fungi_unclassified	Fungi_unclassified	Fungi_unclassified	Fungi_unclassified	Fungi_unclassified
Otu002252	Fungi	Fungi_unclassified	Fungi_unclassified	Fungi_unclassified	Fungi_unclassified	Fungi_unclassified
Otu002253	Fungi	Fungi_unclassified	Fungi_unclassified	Fungi_unclassified	Fungi_unclassified	Fungi_unclassified
Otu002254	Fungi	Ascomycota	Ascomycota_unclassified	Ascomycota_unclassified	Ascomycota_unclassified	Ascomycota_unclassified
Otu002255	Fungi	Ascomycota	Saccharomycetes	Saccharomycetales	Phaffomycetaceae	Cyberlindnera
Otu002256	Fungi	Chytridiomycota	Spizellomycetes	Spizellomycetales	Spizellomycetaceae	Gaertneriomyces
Otu002257	Fungi	Basidiomycota	Agaricomycetes	Sebacinales	Sebacinales_unclassified	Sebacinales_unclassified
Otu002259	Fungi	Ascomycota	Eurotiomycetes	Eurotiomycetes_unclassified	Eurotiomycetes_unclassified	Eurotiomycetes_unclassified
Otu002260	Fungi	Ascomycota	Sordariomycetes	Glomerellales	Plectosphaerellaceae	Gibellulopsis
Otu002261	Fungi	Fungi_unclassified	Fungi_unclassified	Fungi_unclassified	Fungi_unclassified	Fungi_unclassified
Otu002262	Fungi	Fungi_unclassified	Fungi_unclassified	Fungi_unclassified	Fungi_unclassified	Fungi_unclassified
Otu002265	Fungi	Basidiomycota	Basidiomycota_unclassified	Basidiomycota_unclassified	Basidiomycota_unclassified	Basidiomycota_unclassified
Otu002266	Fungi	Ascomycota	Dothideomycetes	Pleosporales	Pleosporales_unclassified	Pleosporales_unclassified
Otu002268	Fungi	Ascomycota	Ascomycota_unclassified	Ascomycota_unclassified	Ascomycota_unclassified	Ascomycota_unclassified
Otu002271	Fungi	Fungi_unclassified	Fungi_unclassified	Fungi_unclassified	Fungi_unclassified	Fungi_unclassified
Otu002272	Fungi	Fungi_unclassified	Fungi_unclassified	Fungi_unclassified	Fungi_unclassified	Fungi_unclassified
Otu002273	Fungi	Ascomycota	Dothideomycetes	Pleosporales	Pleosporales_unclassified	Pleosporales_unclassified
Otu002274	Fungi	Ascomycota	Ascomycota_unclassified	Ascomycota_unclassified	Ascomycota_unclassified	Ascomycota_unclassified
Otu002275	Fungi	Ascomycota	Sordariomycetes	Hypocreales	Ophiocordycipitaceae	Hirsutella
Otu002276	Fungi	Ascomycota	Sordariomycetes	Hypocreales	Nectriaceae	Fusarium
Otu002277	Fungi	Basidiomycota	Agaricomycetes	Agaricales	Bolbitiaceae	Conocybe
Otu002278	Fungi	Fungi_unclassified	Fungi_unclassified	Fungi_unclassified	Fungi_unclassified	Fungi_unclassified
Otu002280	Fungi	Fungi_unclassified	Fungi_unclassified	Fungi_unclassified	Fungi_unclassified	Fungi_unclassified
Otu002281	Fungi	Ascomycota	Orbiliomycetes	unclassified	unclassified	unclassified
Otu002282	Fungi	Fungi_unclassified	Fungi_unclassified	Fungi_unclassified	Fungi_unclassified	Fungi_unclassified
Otu002283	Fungi	Ascomycota	Eurotiomycetes	Eurotiales	Aspergillaceae	Penicillium
Otu002284	Fungi	Fungi_unclassified	Fungi_unclassified	Fungi_unclassified	Fungi_unclassified	Fungi_unclassified
Otu002286	Fungi	Ascomycota	Sordariomycetes	Glomerellales	Plectosphaerellaceae	Plectosphaerellaceae_unclassified
Otu002288	Fungi	Ascomycota	Eurotiomycetes	Eurotiomycetes_unclassified	Eurotiomycetes_unclassified	Eurotiomycetes_unclassified
Otu002289	Fungi	Chytridiomycota	unclassified	unclassified	unclassified	unclassified
Otu002290	Fungi	Ascomycota	Ascomycota_unclassified	Ascomycota_unclassified	Ascomycota_unclassified	Ascomycota_unclassified
Otu002292	Fungi	Fungi_unclassified	Fungi_unclassified	Fungi_unclassified	Fungi_unclassified	Fungi_unclassified
Otu002293	Fungi	Ascomycota	Ascomycota_unclassified	Ascomycota_unclassified	Ascomycota_unclassified	Ascomycota_unclassified
Otu002294	Fungi	Ascomycota	Ascomycota_unclassified	Ascomycota_unclassified	Ascomycota_unclassified	Ascomycota_unclassified
Otu002298	Fungi	Fungi_unclassified	Fungi_unclassified	Fungi_unclassified	Fungi_unclassified	Fungi_unclassified
Otu002300	Fungi	Basidiomycota	Agaricomycetes	Sebacinales	Serendipitaceae	Serendipita
Otu002301	Fungi	Fungi_unclassified	Fungi_unclassified	Fungi_unclassified	Fungi_unclassified	Fungi_unclassified
Otu002302	Fungi	Ascomycota	Ascomycota_unclassified	Ascomycota_unclassified	Ascomycota_unclassified	Ascomycota_unclassified
Otu002303	Fungi	Mucoromycota	Mucoromycetes	Mucorales	Mucorales_unclassified	Mucorales_unclassified
Otu002304	Fungi	Fungi_unclassified	Fungi_unclassified	Fungi_unclassified	Fungi_unclassified	Fungi_unclassified
Otu002305	Fungi	Fungi_unclassified	Fungi_unclassified	Fungi_unclassified	Fungi_unclassified	Fungi_unclassified
Otu002306	Fungi	Rozellomycota	unclassified	unclassified	unclassified	unclassified
Otu002308	Fungi	Fungi_unclassified	Fungi_unclassified	Fungi_unclassified	Fungi_unclassified	Fungi_unclassified
Otu002309	Fungi	Fungi_unclassified	Fungi_unclassified	Fungi_unclassified	Fungi_unclassified	Fungi_unclassified
Otu002310	Fungi	Ascomycota	Sordariomycetes	Sordariales	Chaetomiaceae	Chaetomiaceae_unclassified
Otu002311	Fungi	Fungi_unclassified	Fungi_unclassified	Fungi_unclassified	Fungi_unclassified	Fungi_unclassified
Otu002312	Fungi	Ascomycota	Sordariomycetes	Sordariales	Sordariaceae	unclassified
Otu002313	Fungi	Fungi_unclassified	Fungi_unclassified	Fungi_unclassified	Fungi_unclassified	Fungi_unclassified
Otu002315	Fungi	Fungi_unclassified	Fungi_unclassified	Fungi_unclassified	Fungi_unclassified	Fungi_unclassified
Otu002317	Fungi	Ascomycota	Sordariomycetes	Glomerellales	Plectosphaerellaceae	Plectosphaerellaceae_unclassified
Otu002318	Fungi	Ascomycota	Sordariomycetes	Glomerellales	Plectosphaerellaceae	Gibellulopsis
Otu002319	Fungi	unclassified	unclassified	unclassified	unclassified	unclassified
Otu002320	Fungi	Ascomycota	Orbiliomycetes	Orbiliomycetes_unclassified	Orbiliomycetes_unclassified	Orbiliomycetes_unclassified
Otu002321	Fungi	Fungi_unclassified	Fungi_unclassified	Fungi_unclassified	Fungi_unclassified	Fungi_unclassified
Otu002322	Fungi	Ascomycota	Sordariomycetes	Glomerellales	Plectosphaerellaceae	Gibellulopsis
Otu002323	Fungi	unclassified	unclassified	unclassified	unclassified	unclassified
Otu002324	Fungi	Basidiomycota	Agaricomycetes	Cantharellales	Ceratobasidiaceae	Rhizoctonia
Otu002327	Fungi	Ascomycota	Sordariomycetes	Sordariales	Chaetomiaceae	Chaetomiaceae_unclassified
Otu002329	Fungi	Basidiomycota	Agaricomycetes	Agaricales	Agaricales_unclassified	Agaricales_unclassified
Otu002331	Fungi	Ascomycota	Eurotiomycetes	Chaetothyriales	Herpotrichiellaceae	Herpotrichiellaceae_unclassified
Otu002332	Fungi	Ascomycota	Sordariomycetes	Hypocreales	Nectriaceae	Nectriaceae_unclassified
Otu002333	Fungi	Ascomycota	Eurotiomycetes	Chaetothyriales	Cyphellophoraceae	Cyphellophora
Otu002335	Fungi	Fungi_unclassified	Fungi_unclassified	Fungi_unclassified	Fungi_unclassified	Fungi_unclassified
Otu002336	Fungi	Chytridiomycota	Spizellomycetes	Spizellomycetales	unclassified	unclassified
Otu002337	Fungi	Fungi_unclassified	Fungi_unclassified	Fungi_unclassified	Fungi_unclassified	Fungi_unclassified
Otu002338	Fungi	Basidiomycota	Microbotryomycetes	Microbotryomycetes_ord_Incertae_sedis	Chrysozymaceae	unclassified
Otu002339	Fungi	Ascomycota	Sordariomycetes	Glomerellales	Plectosphaerellaceae	Plectosphaerellaceae_unclassified
Otu002340	Fungi	Fungi_unclassified	Fungi_unclassified	Fungi_unclassified	Fungi_unclassified	Fungi_unclassified
Otu002341	Fungi	Fungi_unclassified	Fungi_unclassified	Fungi_unclassified	Fungi_unclassified	Fungi_unclassified
Otu002342	Fungi	Chytridiomycota	Spizellomycetes	Spizellomycetales	unclassified	unclassified
Otu002343	Fungi	Ascomycota	Sordariomycetes	Sordariales	Sordariales_unclassified	Sordariales_unclassified
Otu002344	Fungi	Ascomycota	Pezizomycetes	Pezizales	Pezizaceae	unclassified
Otu002346	Fungi	Fungi_unclassified	Fungi_unclassified	Fungi_unclassified	Fungi_unclassified	Fungi_unclassified
Otu002347	Fungi	Fungi_unclassified	Fungi_unclassified	Fungi_unclassified	Fungi_unclassified	Fungi_unclassified
Otu002348	Fungi	Ascomycota	Sordariomycetes	Hypocreales	Cordycipitaceae	Blackwellomyces
Otu002349	Fungi	unclassified	unclassified	unclassified	unclassified	unclassified
Otu002350	Fungi	Mortierellomycota	Mortierellomycetes	Mortierellales	Mortierellaceae	Mortierellaceae_unclassified
Otu002352	Fungi	Ascomycota	Ascomycota_unclassified	Ascomycota_unclassified	Ascomycota_unclassified	Ascomycota_unclassified
Otu002353	Fungi	Ascomycota	Sordariomycetes	Sordariales	Chaetomiaceae	Chaetomiaceae_unclassified
Otu002355	Fungi	Ascomycota	Sordariomycetes	Hypocreales	Niessliaceae	Eucasphaeria
Otu002358	Fungi	Ascomycota	Sordariomycetes	Hypocreales	Nectriaceae	Fusarium
Otu002359	Fungi	Ascomycota	Sordariomycetes	Coniochaetales	Coniochaetaceae	Coniochaetaceae_unclassified
Otu002360	Fungi	Fungi_unclassified	Fungi_unclassified	Fungi_unclassified	Fungi_unclassified	Fungi_unclassified
Otu002361	Fungi	Fungi_unclassified	Fungi_unclassified	Fungi_unclassified	Fungi_unclassified	Fungi_unclassified
Otu002362	Fungi	Basidiomycota	Tremellomycetes	Tremellales	Bulleribasidiaceae	Hannaella
Otu002363	Fungi	Mortierellomycota	Mortierellomycetes	Mortierellales	Mortierellaceae	Linnemannia
Otu002364	Fungi	Ascomycota	Dothideomycetes	Pleosporales	Phaeosphaeriaceae	Phaeosphaeriaceae_unclassified
Otu002365	Fungi	Fungi_unclassified	Fungi_unclassified	Fungi_unclassified	Fungi_unclassified	Fungi_unclassified
Otu002368	Fungi	Ascomycota	Ascomycota_unclassified	Ascomycota_unclassified	Ascomycota_unclassified	Ascomycota_unclassified
Otu002369	Fungi	Ascomycota	Sordariomycetes	Hypocreales	Hypocreales_unclassified	Hypocreales_unclassified
Otu002370	Fungi	Fungi_unclassified	Fungi_unclassified	Fungi_unclassified	Fungi_unclassified	Fungi_unclassified
Otu002371	Fungi	Ascomycota	Sordariomycetes	Sordariales	Podosporaceae	Cladorrhinum
Otu002372	Fungi	Fungi_unclassified	Fungi_unclassified	Fungi_unclassified	Fungi_unclassified	Fungi_unclassified
Otu002374	Fungi	Ascomycota	Ascomycota_unclassified	Ascomycota_unclassified	Ascomycota_unclassified	Ascomycota_unclassified
Otu002375	Fungi	Basidiomycota	Agaricomycetes	Agaricales	Psathyrellaceae	Coprinellus
Otu002377	Fungi	unclassified	unclassified	unclassified	unclassified	unclassified
Otu002378	Fungi	Ascomycota	Sordariomycetes	Glomerellales	Plectosphaerellaceae	Plectosphaerellaceae_unclassified
Otu002379	Fungi	Ascomycota	Eurotiomycetes	Chaetothyriales	Herpotrichiellaceae	Cladophialophora
Otu002380	Fungi	Ascomycota	Dothideomycetes	Pleosporales	Phaeosphaeriaceae	Paraphoma
Otu002382	Fungi	unclassified	unclassified	unclassified	unclassified	unclassified
Otu002383	Fungi	Fungi_unclassified	Fungi_unclassified	Fungi_unclassified	Fungi_unclassified	Fungi_unclassified
Otu002385	Fungi	Basidiomycota	Agaricomycetes	Agaricales	Psathyrellaceae	Parasola
Otu002387	Fungi	Fungi_unclassified	Fungi_unclassified	Fungi_unclassified	Fungi_unclassified	Fungi_unclassified
Otu002388	Fungi	Ascomycota	Sordariomycetes	Sordariomycetes_unclassified	Sordariomycetes_unclassified	Sordariomycetes_unclassified
Otu002389	Fungi	Ascomycota	Sordariomycetes	Sordariales	Chaetomiaceae	Chaetomiaceae_unclassified
Otu002390	Fungi	Ascomycota	Sordariomycetes	Hypocreales	Nectriaceae	Thelonectria
Otu002391	Fungi	Mucoromycota	Mucoromycetes	Mucorales	Mucoraceae	Mucor
Otu002392	Fungi	Ascomycota	Sordariomycetes	Glomerellales	Plectosphaerellaceae	Plectosphaerellaceae_unclassified
Otu002394	Fungi	Chytridiomycota	Chytridiomycota_unclassified	Chytridiomycota_unclassified	Chytridiomycota_unclassified	Chytridiomycota_unclassified
Otu002395	Fungi	Fungi_unclassified	Fungi_unclassified	Fungi_unclassified	Fungi_unclassified	Fungi_unclassified
Otu002397	Fungi	Ascomycota	Eurotiomycetes	Eurotiales	Aspergillaceae	Penicillium
Otu002400	Fungi	Fungi_unclassified	Fungi_unclassified	Fungi_unclassified	Fungi_unclassified	Fungi_unclassified
Otu002401	Fungi	Fungi_unclassified	Fungi_unclassified	Fungi_unclassified	Fungi_unclassified	Fungi_unclassified
Otu002402	Fungi	Ascomycota	Leotiomycetes	Helotiales	Helotiales_unclassified	Helotiales_unclassified
Otu002403	Fungi	Fungi_unclassified	Fungi_unclassified	Fungi_unclassified	Fungi_unclassified	Fungi_unclassified
Otu002404	Fungi	Ascomycota	Sordariomycetes	Glomerellales	Plectosphaerellaceae	Plectosphaerella
Otu002406	Fungi	unclassified	unclassified	unclassified	unclassified	unclassified
Otu002407	Fungi	Basidiomycota	Tremellomycetes	Filobasidiales	Piskurozymaceae	Solicoccozyma
Otu002408	Fungi	Chytridiomycota	Spizellomycetes	Spizellomycetales	Powellomycetaceae	Powellomyces
Otu002409	Fungi	Fungi_unclassified	Fungi_unclassified	Fungi_unclassified	Fungi_unclassified	Fungi_unclassified
Otu002410	Fungi	unclassified	unclassified	unclassified	unclassified	unclassified
Otu002411	Fungi	Fungi_unclassified	Fungi_unclassified	Fungi_unclassified	Fungi_unclassified	Fungi_unclassified
Otu002413	Fungi	Ascomycota	Sordariomycetes	Sordariales	Sordariales_unclassified	Sordariales_unclassified
Otu002414	Fungi	Basidiomycota	Agaricomycetes	Agaricales	Hygrophoraceae	Arrhenia
Otu002415	Fungi	Ascomycota	Sordariomycetes	Hypocreales	Bionectriaceae	Clonostachys
Otu002416	Fungi	Fungi_unclassified	Fungi_unclassified	Fungi_unclassified	Fungi_unclassified	Fungi_unclassified
Otu002417	Fungi	Ascomycota	Eurotiomycetes	Eurotiales	Aspergillaceae	Talaromyces
Otu002418	Fungi	Fungi_unclassified	Fungi_unclassified	Fungi_unclassified	Fungi_unclassified	Fungi_unclassified
Otu002419	Fungi	Ascomycota	Dothideomycetes	Pleosporales	Pleosporales_unclassified	Pleosporales_unclassified
Otu002420	Fungi	Chytridiomycota	Chytridiomycota_unclassified	Chytridiomycota_unclassified	Chytridiomycota_unclassified	Chytridiomycota_unclassified
Otu002421	Fungi	Ascomycota	Sordariomycetes	Sordariomycetes_unclassified	Sordariomycetes_unclassified	Sordariomycetes_unclassified
Otu002422	Fungi	Mortierellomycota	Mortierellomycetes	Mortierellales	Mortierellaceae	Mortierellaceae_unclassified
Otu002423	Fungi	Kickxellomycota	Ramicandelaberomycetes	Ramicandelaberales	Ramicandelaberaceae	Ramicandelaber
Otu002424	Fungi	Ascomycota	Dothideomycetes	Pleosporales	Pleosporaceae	Alternaria
Otu002425	Fungi	Chytridiomycota	Chytridiomycota_unclassified	Chytridiomycota_unclassified	Chytridiomycota_unclassified	Chytridiomycota_unclassified
Otu002426	Fungi	Ascomycota	Sordariomycetes	Sordariales	Podosporaceae	Podospora
Otu002429	Fungi	Fungi_unclassified	Fungi_unclassified	Fungi_unclassified	Fungi_unclassified	Fungi_unclassified
Otu002430	Fungi	Mortierellomycota	Mortierellomycetes	Mortierellales	Mortierellaceae	Mortierellaceae_unclassified
Otu002431	Fungi	Fungi_unclassified	Fungi_unclassified	Fungi_unclassified	Fungi_unclassified	Fungi_unclassified
Otu002433	Fungi	Fungi_unclassified	Fungi_unclassified	Fungi_unclassified	Fungi_unclassified	Fungi_unclassified
Otu002434	Fungi	Ascomycota	Sordariomycetes	Hypocreales	Hypocreales_unclassified	Hypocreales_unclassified
Otu002435	Fungi	Fungi_unclassified	Fungi_unclassified	Fungi_unclassified	Fungi_unclassified	Fungi_unclassified
Otu002437	Fungi	Fungi_unclassified	Fungi_unclassified	Fungi_unclassified	Fungi_unclassified	Fungi_unclassified
Otu002438	Fungi	unclassified	unclassified	unclassified	unclassified	unclassified
Otu002439	Fungi	Basidiomycota	Agaricomycetes	Polyporales	Ganodermataceae	Ganoderma
Otu002441	Fungi	Ascomycota	Sordariomycetes	Sordariales	Sordariales_unclassified	Sordariales_unclassified
Otu002442	Fungi	Ascomycota	Sordariomycetes	Glomerellales	Plectosphaerellaceae	Plectosphaerella
Otu002443	Fungi	Chytridiomycota	Chytridiomycota_unclassified	Chytridiomycota_unclassified	Chytridiomycota_unclassified	Chytridiomycota_unclassified
Otu002444	Fungi	Ascomycota	Sordariomycetes	Sordariales	Chaetomiaceae	Chaetomiaceae_unclassified
Otu002445	Fungi	unclassified	unclassified	unclassified	unclassified	unclassified
Otu002446	Fungi	Ascomycota	Dothideomycetes	Dothideomycetes_unclassified	Dothideomycetes_unclassified	Dothideomycetes_unclassified
Otu002449	Fungi	Chytridiomycota	Spizellomycetes	Spizellomycetales	unclassified	unclassified
Otu002450	Fungi	Ascomycota	Orbiliomycetes	Orbiliales	Orbiliaceae	Dactylella
Otu002451	Fungi	Chytridiomycota	Spizellomycetes	Spizellomycetales	unclassified	unclassified
Otu002452	Fungi	Ascomycota	Sordariomycetes	Myrmecridiales	Myrmecridiaceae	Myrmecridium
Otu002453	Fungi	Ascomycota	Ascomycota_unclassified	Ascomycota_unclassified	Ascomycota_unclassified	Ascomycota_unclassified
Otu002454	Fungi	Fungi_unclassified	Fungi_unclassified	Fungi_unclassified	Fungi_unclassified	Fungi_unclassified
Otu002455	Fungi	Fungi_unclassified	Fungi_unclassified	Fungi_unclassified	Fungi_unclassified	Fungi_unclassified
Otu002456	Fungi	Fungi_unclassified	Fungi_unclassified	Fungi_unclassified	Fungi_unclassified	Fungi_unclassified
Otu002457	Fungi	Fungi_unclassified	Fungi_unclassified	Fungi_unclassified	Fungi_unclassified	Fungi_unclassified
Otu002459	Fungi	Ascomycota	Sordariomycetes	Magnaporthales	Magnaporthaceae	Pseudophialophora
Otu002460	Fungi	Ascomycota	Eurotiomycetes	Chaetothyriales	Herpotrichiellaceae	Herpotrichiellaceae_unclassified
Otu002461	Fungi	Chytridiomycota	unclassified	unclassified	unclassified	unclassified
[truncated: 14,026 more rows]

## Sheet: Fig.3ABC,Fig.5AB,FigS2A
Source Data 3. Metadata file for 16S
Sample_ID	Rep	Sampling Time (coded as )	Farm Location	Variety	Susceptibility	Soil sampled zone
T27A	1	T1	Barnes	NC196	M	Root zone soil
T28A	2	T1	Barnes	NC196	M	Root zone soil
T29A	3	T1	Barnes	NC196	M	Root zone soil
T30A	4	T1	Barnes	NC196	M	Root zone soil
T31A	5	T1	Barnes	NC196	M	Root zone soil
T32A	6	T1	Barnes	NC196	M	Root zone soil
T33A	1	T2	Barnes	NC196	M	Root zone soil
T34A	2	T2	Barnes	NC196	M	Root zone soil
T35A	3	T2	Barnes	NC196	M	Root zone soil
T36A	4	T2	Barnes	NC196	M	Root zone soil
T37A	5	T2	Barnes	NC196	M	Root zone soil
T38A	6	T2	Barnes	NC196	M	Root zone soil
T39A	1	T3	Barnes	NC196	M	Root zone soil
T40A	2	T3	Barnes	NC196	M	Root zone soil
T41A	3	T3	Barnes	NC196	M	Root zone soil
T42A	4	T3	Barnes	NC196	M	Root zone soil
T43A	5	T3	Barnes	NC196	M	Root zone soil
T44A	6	T3	Barnes	NC196	M	Root zone soil
T45A	1	T4	Barnes	NC196	M	Root zone soil
T46A	2	T4	Barnes	NC196	M	Root zone soil
T47A	3	T4	Barnes	NC196	M	Root zone soil
T48A	4	T4	Barnes	NC196	M	Root zone soil
T49A	5	T4	Barnes	NC196	M	Root zone soil
T50A	6	T4	Barnes	NC196	M	Root zone soil
T51A	1	T6	Barnes	NC196	M	Root zone soil
T52A	2	T6	Barnes	NC196	M	Root zone soil
T53A	3	T6	Barnes	NC196	M	Root zone soil
T54A	4	T6	Barnes	NC196	M	Root zone soil
T55A	5	T6	Barnes	NC196	M	Root zone soil
T56A	6	T6	Barnes	NC196	M	Root zone soil
T57A	1	T1	C&C	NC196	M	Root zone soil
T58A	2	T1	C&C	NC196	M	Root zone soil
T59A	3	T1	C&C	NC196	M	Root zone soil
T60A	4	T1	C&C	NC196	M	Root zone soil
T61A	5	T1	C&C	NC196	M	Root zone soil
T62A	6	T1	C&C	NC196	M	Root zone soil
T63A	1	T2	C&C	NC196	M	Root zone soil
T64A	2	T2	C&C	NC196	M	Root zone soil
T65A	3	T2	C&C	NC196	M	Root zone soil
T66A	4	T2	C&C	NC196	M	Root zone soil
T67A	5	T2	C&C	NC196	M	Root zone soil
T68A	6	T2	C&C	NC196	M	Root zone soil
T69A	1	T3	C&C	NC196	M	Root zone soil
T70A	2	T3	C&C	NC196	M	Root zone soil
T71A	3	T3	C&C	NC196	M	Root zone soil
T72A	4	T3	C&C	NC196	M	Root zone soil
T73A	5	T3	C&C	NC196	M	Root zone soil
T74A	6	T3	C&C	NC196	M	Root zone soil
T75A	1	T4	C&C	NC196	M	Root zone soil
T76A	2	T4	C&C	NC196	M	Root zone soil
T77A	3	T4	C&C	NC196	M	Root zone soil
T78A	4	T4	C&C	NC196	M	Root zone soil
T79A	1	T5	C&C	NC196	M	Root zone soil
T80A	2	T5	C&C	NC196	M	Root zone soil
T81A	3	T5	C&C	NC196	M	Root zone soil
T82A	4	T5	C&C	NC196	M	Root zone soil
T83A	5	T5	C&C	NC196	M	Root zone soil
T84A	6	T5	C&C	NC196	M	Root zone soil
T85A	1	T1	Ferrel	NC196	M	Root zone soil
T86A	2	T1	Ferrel	NC196	M	Root zone soil
T87A	3	T1	Ferrel	NC196	M	Root zone soil
T88A	4	T1	Ferrel	NC196	M	Root zone soil
T89A	5	T1	Ferrel	NC196	M	Root zone soil
T90A	6	T1	Ferrel	NC196	M	Root zone soil
T91A	1	T2	Ferrel	NC196	M	Root zone soil
T92A	2	T2	Ferrel	NC196	M	Root zone soil
T93A	3	T2	Ferrel	NC196	M	Root zone soil
T94A	4	T2	Ferrel	NC196	M	Root zone soil
T95A	5	T2	Ferrel	NC196	M	Root zone soil
T96A	6	T2	Ferrel	NC196	M	Root zone soil
T97A	1	T3	Ferrel	NC196	M	Root zone soil
T98A	2	T3	Ferrel	NC196	M	Root zone soil
T99A	3	T3	Ferrel	NC196	M	Root zone soil
T100A	4	T3	Ferrel	NC196	M	Root zone soil
T101A	5	T3	Ferrel	NC196	M	Root zone soil
T102A	6	T3	Ferrel	NC196	M	Root zone soil
T103A	1	T4	Ferrel	NC196	M	Root zone soil
T104A	2	T4	Ferrel	NC196	M	Root zone soil
T105A	3	T4	Ferrel	NC196	M	Root zone soil
[truncated: 9 more rows]

## Sheet: Fig.3DEF,Fig.5CD,FigS2B
Source Data 4. Metadata file for ITS
[truncated: 89 more rows]

[truncated: 5 more sheets: Fig.1ABC, Fig.2, Fig.4,FigS3, Fig.1D, Fig.2;Fig.S1, Fig.5&6;Tab1,2,3_bacteria, Fig5&6;Tab1,2,3_fungi]
